# Supplementary material for: Comparative transcriptome analysis of emerging young and mature leaves of Bienertia sinuspersici, a single-cell C4 plant
Source: PeerJ. 2025 Apr 29;13:e19282. doi: 10.7717/peerj.19282 (PMC12047216; doi:10.7717/peerj.19282)
Supplement: Supplemental Information 2 [file peerj-13-19282-s002.xlsx]

## Sheet: AnnotatedTranscriptome
Name	Annotated Name	Length	e-Value	GO Names	Enzyme Names	InterPro GO IDs	InterPro GO Names	Total read count	Average coverage	MatureAll Reads	YoungAll Reads	MatureAll RPKM	YoungAll RPKM	M/Y 2FC	NOIseq - Probability	NOIseq - D	NOIseq - M	NOIseq - Ranking	Differential Expression
GZUJ98X01_(single)_trimmed_contig_10074	cytochrome p450	838	2.07e-75	P:obsolete oxidation-reduction process; F:iron ion binding; F:oxidoreductase activity, acting on paired donors, with incorporation or reduction of molecular oxygen; F:heme binding		P:GO:0055114; F:GO:0005506; F:GO:0016705; F:GO:0020037	P:obsolete oxidation-reduction process; F:iron ion binding; F:oxidoreductase activity, acting on paired donors, with incorporation or reduction of molecular oxygen; F:heme binding	1291	154.925	2517	689	19.01	5.21	1.8674	0.961	14.815	-2.175	-14.973	DE - Mature
GZUJ98X01_(single)_trimmed_contig_10378	transposon mutator sub-class	2188	2.91e-47	F:zinc ion binding		F:GO:0008270	F:zinc ion binding	1932	92.815	4079	1179	11.8	3.41	1.79094	0.955	9.049	-2.097	-9.289	DE - Mature
GZUJ98X01_(single)_trimmed_contig_10397	retrotransposon protein	1009	4.36e-71	P:DNA metabolic process; F:nucleic acid binding; F:catalytic activity		no IPS match	no IPS match	285	28.345	661	26	4.15	0.16	4.69697	0.95	4.018	-4.974	-6.394	DE - Mature
GZUJ98X01_(single)_trimmed_contig_10419	non-ltr retroelement reverse transcriptase	7700	1.12e-134	F:binding		no GO terms	no GO terms	2837	38.038	6948	1484	5.71	1.22	2.22661	0.929	4.729	-2.533	-5.364	DE - Mature
GZUJ98X01_(single)_trimmed_contig_10432	cytochrome p450 76c4	1522	9.91e-126	P:monoterpenoid biosynthetic process; P:obsolete oxidation-reduction process; F:iron ion binding; F:oxidoreductase activity, acting on paired donors, with incorporation or reduction of molecular oxygen, NAD(P)H as one donor, and incorporation of one atom of oxygen; F:heme binding; C:membrane	Acting on paired donors, with incorporation or reduction of molecular oxygen. The oxygen incorporated need not be derived from O(2)	P:GO:0055114; F:GO:0005506; F:GO:0016705; F:GO:0020037	P:obsolete oxidation-reduction process; F:iron ion binding; F:oxidoreductase activity, acting on paired donors, with incorporation or reduction of molecular oxygen; F:heme binding	1311	88.873	2817	424	11.72	1.76	2.73533	0.987	10.298	-3.038	-10.737	DE - Mature
GZUJ98X01_(single)_trimmed_contig_10446	diacylglycerol kinase 1-like	481	1.11e-76	P:protein kinase C-activating G protein-coupled receptor signaling pathway; P:phosphorylation; P:intracellular signal transduction; P:membrane fusion; F:NAD+ kinase activity; F:diacylglycerol kinase activity; F:calcium ion binding; C:cytoplasm	NAD(+) kinase; Diacylglycerol kinase (ATP)	P:GO:0007205; P:GO:0008152; F:GO:0003951; F:GO:0004143	P:protein kinase C-activating G protein-coupled receptor signaling pathway; P:metabolic process; F:NAD+ kinase activity; F:diacylglycerol kinase activity	147	31.63	323	86	4.25	1.13	1.91114	0.908	3.338	-2.215	-4.006	DE - Mature
GZUJ98X01_(single)_trimmed_contig_10504	uncharacterized calcium-binding protein at1g02270-like	635	6.15e-20	P:glycolytic process; P:response to cold; F:glyceraldehyde-3-phosphate dehydrogenase (NAD+) (phosphorylating) activity; F:endonuclease activity; F:exonuclease activity; F:calcium ion binding; C:nucleus; C:cytoplasmic vesicle	Glyceraldehyde-3-phosphate dehydrogenase (phosphorylating)	no IPS match	no IPS match	676	107.024	1207	326	12.03	3.25	1.88813	0.955	9.411	-2.194	-9.663	DE - Mature
GZUJ98X01_(single)_trimmed_contig_10677	auxin-induced protein 15a	289	2.85e-19	P:response to auxin; P:response to chitin; P:chlorophyll biosynthetic process; C:mitochondrion; C:chloroplast		no GO terms	no GO terms	187	66.26	418	47	9.16	1.03	3.1527	0.984	8.329	-3.459	-9.019	DE - Mature
GZUJ98X01_(single)_trimmed_contig_10773	uncharacterized hydrolase yugf-like	261	8.48e-32	P:maltose metabolic process; P:starch biosynthetic process; P:positive regulation of catalytic activity; F:protein dimerization activity; F:retinyl-palmitate esterase activity; F:carboxylic ester hydrolase activity; F:methyl indole-3-acetate esterase activity; F:methyl salicylate esterase activity; F:methyl jasmonate esterase activity; C:chloroplast envelope	Carboxylesterase; Acting on ester bonds	no GO terms	no GO terms	245	97.069	656	149	15.91	3.61	2.13986	0.966	12.997	-2.444	-13.225	DE - Mature
GZUJ98X01_(single)_trimmed_contig_10786	mitogen-activated protein kinase kinase	1366	3.15e-128	P:tryptophan catabolic process; P:defense response; P:response to wounding; P:response to salt stress; P:indoleacetic acid biosynthetic process; P:ethylene biosynthetic process; P:ethylene-activated signaling pathway; P:camalexin biosynthetic process; P:response to chitin; P:cysteine biosynthetic process; P:positive regulation of protein kinase activity; P:positive regulation of DNA-templated tra…	Transferring phosphorus-containing groups	P:GO:0006468; F:GO:0004672; F:GO:0004674; F:GO:0005524; F:GO:0016772	P:protein phosphorylation; F:protein kinase activity; F:protein serine/threonine kinase activity; F:ATP binding; F:transferase activity, transferring phosphorus-containing groups	1116	85.63	3367	833	15.6	3.86	2.01487	0.965	12.49	-2.321	-12.704	DE - Mature
GZUJ98X01_(single)_trimmed_contig_11100	protein	230	5.32e-26	P:obsolete activation of MAPKK activity; P:response to fungus; F:MAP kinase kinase kinase activity; F:calcium ion binding; F:ATP binding; F:polysaccharide binding; C:cell wall; C:integral component of membrane	Mitogen-activated protein kinase kinase kinase; Transferring phosphorus-containing groups	P:GO:0006468; F:GO:0004672; F:GO:0004674; F:GO:0005524; F:GO:0016772	P:protein phosphorylation; F:protein kinase activity; F:protein serine/threonine kinase activity; F:ATP binding; F:transferase activity, transferring phosphorus-containing groups	79	33.657	215	40	5.92	1.1	2.42809	0.958	5.031	-2.732	-5.725	DE - Mature
GZUJ98X01_(single)_trimmed_contig_11101	protein	314	2.83e-40	P:obsolete activation of MAPKK activity; P:response to fungus; P:response to zinc ion; P:response to nickel cation; P:response to cadmium ion; F:MAP kinase kinase kinase activity; F:calcium ion binding; F:ATP binding; F:polysaccharide binding; C:plasma membrane; C:plant-type cell wall; C:cell surface; C:integral component of membrane	Mitogen-activated protein kinase kinase kinase; Transferring phosphorus-containing groups	P:GO:0006468; F:GO:0004672; F:GO:0004674; F:GO:0005524; F:GO:0016772	P:protein phosphorylation; F:protein kinase activity; F:protein serine/threonine kinase activity; F:ATP binding; F:transferase activity, transferring phosphorus-containing groups	155	49.006	424	117	8.55	2.36	1.85714	0.944	6.645	-2.163	-6.988	DE - Mature
GZUJ98X01_(single)_trimmed_contig_11102	wakld_arath ame: full=wall-associated receptor kinase-like 4 flags: precursor	340	9.76e-41	P:obsolete activation of MAPKK activity; P:response to zinc ion; P:response to nickel cation; P:response to chitin; P:response to cadmium ion; P:protein autophosphorylation; P:defense response to fungus; F:MAP kinase kinase kinase activity; F:protein tyrosine kinase activity; F:calcium ion binding; F:ATP binding; F:polysaccharide binding; C:plasma membrane; C:plant-type cell wall; C:cell surface;…	Mitogen-activated protein kinase kinase kinase; Transferring phosphorus-containing groups; Transferring phosphorus-containing groups	P:GO:0006468; F:GO:0004672; F:GO:0005524; F:GO:0016772	P:protein phosphorylation; F:protein kinase activity; F:ATP binding; F:transferase activity, transferring phosphorus-containing groups	347	103.285	632	153	11.77	2.85	2.04608	0.96	9.47	-2.352	-9.758	DE - Mature
GZUJ98X01_(single)_trimmed_contig_11239	saur-like auxin-responsive protein	289	3.03e-26	P:response to cold; P:response to auxin; P:response to chitin; P:chlorophyll biosynthetic process; C:mitochondrion; C:plasma membrane; C:chloroplast		no GO terms	no GO terms	267	93.803	596	108	13.06	2.37	2.4622	0.982	11.15	-2.77	-11.489	DE - Mature
GZUJ98X01_(single)_trimmed_contig_11285	transmembrane 9 superfamily protein member	448	5.55e-51	C:Golgi apparatus; C:integral component of membrane; C:cytoplasmic vesicle		C:GO:0016021	C:integral component of membrane	230	58.444	420	116	5.93	1.64	1.85434	0.925	4.612	-2.162	-5.094	DE - Mature
GZUJ98X01_(single)_trimmed_contig_11396	prolyl 4-hydroxylase alpha subunit-like protein	1222	7.59e-24	P:cell morphogenesis; P:systemic acquired resistance; P:cell growth; P:peptidyl-proline hydroxylation to 4-hydroxy-L-proline; P:response to endoplasmic reticulum stress; P:Golgi vesicle transport; P:obsolete oxidation-reduction process; P:root hair cell development; F:procollagen-proline 4-dioxygenase activity; F:iron ion binding; F:L-ascorbic acid binding; C:extracellular region; C:nucleus; C:en…	Procollagen-proline 4-dioxygenase	no GO terms	no GO terms	500	42.764	1389	203	7.2	1.05	2.77761	0.972	6.35	-3.08	-7.057	DE - Mature
GZUJ98X01_(single)_trimmed_contig_1161	lycopene beta-cyclase	263	4.96e-40	P:carotenoid biosynthetic process; F:oxidoreductase activity, acting on paired donors, with incorporation or reduction of molecular oxygen		P:GO:0016117; F:GO:0016705	P:carotenoid biosynthetic process; F:oxidoreductase activity, acting on paired donors, with incorporation or reduction of molecular oxygen	135	53.802	322	87	7.75	2.09	1.89069	0.944	6.061	-2.194	-6.446	DE - Mature
GZUJ98X01_(single)_trimmed_contig_11694	disease resistance protein rga3-like	2033	4.17e-150	P:defense response; F:catalytic activity; F:protein binding; F:ADP binding		P:GO:0006952; F:GO:0005515; F:GO:0043531	P:defense response; F:protein binding; F:ADP binding	1289	66.207	2456	627	7.65	1.95	1.97199	0.944	6.073	-2.276	-6.485	DE - Mature
GZUJ98X01_(single)_trimmed_contig_11725	protein	1063	1.24e-95	C:obsolete intracellular part		no GO terms	no GO terms	1006	96.547	2869	258	17.09	1.54	3.47215	0.995	15.854	-3.781	-16.299	DE - Mature
GZUJ98X01_(single)_trimmed_contig_11740	glutaredoxin family protein	690	1.17e-28	P:cell redox homeostasis; P:anther development; F:arsenate reductase (glutaredoxin) activity; F:electron transfer activity; F:protein-disulfide reductase activity	Arsenate reductase (glutathione/glutaredoxin)	P:GO:0045454; F:GO:0009055; F:GO:0015035	P:cell redox homeostasis; F:electron transfer activity; F:protein-disulfide reductase activity	696	105.01	1574	27	14.44	0.25	5.852	0.995	14.251	-6.171	-15.53	DE - Mature
GZUJ98X01_(single)_trimmed_contig_11750	jacalin-like lectin domain-containing protein	764	6.7e-64	P:chlorophyll catabolic process; C:extracellular region		no GO terms	no GO terms	279	37.418	583	143	4.83	1.18	2.03324	0.908	3.875	-2.333	-4.523	DE - Mature
GZUJ98X01_(single)_trimmed_contig_11785	nbs-lrr type resistance protein	338	2e-11	P:defense response; F:ADP binding		no GO terms	no GO terms	107	31.151	196	43	3.67	0.81	2.17979	0.908	3.022	-2.494	-3.918	DE - Mature
GZUJ98X01_(single)_trimmed_contig_11856	photosystem i subunit vii	363	2.5e-20	P:photosynthetic electron transport in photosystem I; F:electron transfer activity; F:oxidoreductase activity; F:metal ion binding; F:4 iron, 4 sulfur cluster binding; C:photosystem I; C:chloroplast thylakoid membrane		F:GO:0051536	F:iron-sulfur cluster binding	155	41.851	303	87	5.28	1.52	1.79647	0.925	4.06	-2.106	-4.574	DE - Mature
GZUJ98X01_(single)_trimmed_contig_11903	fk506-binding protein	1090	5.24e-77	P:histone peptidyl-prolyl isomerization; P:protein folding; F:peptidyl-prolyl cis-trans isomerase activity; F:FK506 binding; C:nucleolus; C:chloroplast; C:membrane	Peptidylprolyl isomerase	P:GO:0006457	P:protein folding	1422	136.906	3348	1037	19.44	6.02	1.69119	0.961	14.583	-1.997	-14.719	DE - Mature
GZUJ98X01_(single)_trimmed_contig_11926	major latex	786	3.52e-48	P:defense response; P:response to biotic stimulus; C:chloroplast		P:GO:0006952; P:GO:0009607	P:defense response; P:response to biotic stimulus	401	51.494	913	50	7.35	0.4	4.19967	0.982	7.033	-4.497	-8.347	DE - Mature
GZUJ98X01_(single)_trimmed_contig_12028	uncharacterized membrane protein ylr241w-like	2366	0	C:extracellular region; C:chloroplast; C:membrane; C:cytoplasmic vesicle		C:GO:0016020	C:membrane	3040	141.483	5950	1762	15.92	4.71	1.75704	0.959	12.115	-2.062	-12.289	DE - Mature
GZUJ98X01_(single)_trimmed_contig_12133	phosphoinositide phospholipase c 2	1403	1.73e-128	P:lipid metabolic process; P:response to stress; P:response to abiotic stimulus; P:actin filament-based movement; P:intracellular signal transduction; P:Golgi localization; P:mitochondrion localization; P:peroxisome localization; P:response to oxygen-containing compound; F:phosphatidylinositol phospholipase C activity; F:protein binding; C:plasma membrane	Phosphoinositide phospholipase C	P:GO:0006629; P:GO:0007165; P:GO:0035556; F:GO:0004435; F:GO:0005515; F:GO:0008081	P:lipid metabolic process; P:signal transduction; P:intracellular signal transduction; F:phosphatidylinositol phospholipase C activity; F:protein binding; F:phosphoric diester hydrolase activity	1377	99.252	3628	891	16.37	4.02	2.02579	0.966	13.127	-2.332	-13.333	DE - Mature
GZUJ98X01_(single)_trimmed_contig_12459	hypothetical protein MTR_7g058970	575	1.72e-17	P:response to oxidative stress; P:biological_process; F:molecular_function; C:nucleus		no IPS match	no IPS match	518	90.607	1372	331	15.11	3.64	2.05349	0.965	12.166	-2.357	-12.392	DE - Mature
GZUJ98X01_(single)_trimmed_contig_12480	at3g13860 mcp4_7	534	9.04e-12	P:protein folding; P:response to cadmium ion; F:nucleotide binding; C:mitochondrion; C:vacuolar membrane		no IPS match	no IPS match	266	51.378	609	110	7.22	1.3	2.47349	0.966	6.169	-2.775	-6.765	DE - Mature
GZUJ98X01_(single)_trimmed_contig_12672	abc transporter family protein	273	6.6e-31	P:microtubule cytoskeleton organization; P:cytokinesis; P:obsolete ATP catabolic process; P:response to aluminum ion; P:transmembrane transport; F:ATP binding; F:microtubule binding; F:ABC-type xenobiotic transporter activity; F:ABC-type oligopeptide transporter activity; C:plant-type vacuole; C:vacuolar membrane; C:plasma membrane; C:integral component of membrane; C:ATP-binding cassette (ABC) t…	Acting on acid anhydrides; Acting on acid anhydrides	P:GO:0006810; P:GO:0055085; F:GO:0005524; F:GO:0042626; C:GO:0016021	P:transport; P:transmembrane transport; F:ATP binding; F:ATPase-coupled transmembrane transporter activity; C:integral component of membrane	245	90.755	505	117	11.71	2.71	2.11138	0.96	9.523	-2.416	-9.824	DE - Mature
GZUJ98X01_(single)_trimmed_contig_12725	hypothetical protein VITISV_020704	4198	1.35e-167	F:nucleic acid binding		F:GO:0003676	F:nucleic acid binding	2096	51.157	4787	1478	7.22	2.23	1.69496	0.936	5.42	-2.001	-5.777	DE - Mature
GZUJ98X01_(single)_trimmed_contig_12778	retrotransposon gag protein	6537	0	P:RNA-templated DNA biosynthetic process; F:RNA binding; F:RNA-directed DNA polymerase activity	RNA-directed DNA polymerase	P:GO:0006278; F:GO:0003723; F:GO:0003964	P:RNA-templated DNA biosynthetic process; F:RNA binding; F:RNA-directed DNA polymerase activity	1681	26.818	3798	706	3.68	0.68	2.4361	0.923	3.127	-2.733	-4.153	DE - Mature
GZUJ98X01_(single)_trimmed_contig_12830	tbc domain-containing protein	356	1.82e-62	P:positive regulation of GTPase activity; F:GTPase activator activity; C:cytoplasm; C:plasma membrane		P:GO:0043087; F:GO:0005096	P:regulation of GTPase activity; F:GTPase activator activity	78	22.051	326	54	5.8	0.96	2.59495	0.958	5.024	-2.9	-5.801	DE - Mature
GZUJ98X01_(single)_trimmed_contig_13036	gem-like protein 5	1262	6.38e-46	P:transport		no GO terms	no GO terms	861	70.143	3301	574	16.56	2.88	2.52356	0.986	14.24	-2.83	-14.518	DE - Mature
GZUJ98X01_(single)_trimmed_contig_13038	protein binding	487	2.63e-16	P:intracellular signal transduction; P:obsolete oxidation-reduction process; F:zinc ion binding; F:protein-disulfide reductase (NAD(P)) activity	Protein-disulfide reductase	no IPS match	no IPS match	259	53.201	759	202	9.87	2.63	1.90799	0.949	7.748	-2.216	-8.058	DE - Mature
GZUJ98X01_(single)_trimmed_contig_13598	ribosomal protein s2	4720	6.74e-146	P:translation; P:proton motive force-driven ATP synthesis; P:proton transmembrane transport; F:structural constituent of ribosome; F:proton transmembrane transporter activity; C:chloroplast thylakoid membrane; C:small ribosomal subunit; C:proton-transporting ATP synthase complex, coupling factor F(o)		P:GO:0015986; P:GO:1902600; F:GO:0015078; C:GO:0033177; C:GO:0045263	P:proton motive force-driven ATP synthesis; P:proton transmembrane transport; F:proton transmembrane transporter activity; C:proton-transporting two-sector ATPase complex, proton-transporting domain; C:proton-transporting ATP synthase complex, coupling factor F(o)	5228	124.094	11258	2128	15.1	2.85	2.40551	0.983	12.8	-2.709	-13.084	DE - Mature
GZUJ98X01_(single)_trimmed_contig_13784	beta-adaptin-like protein c	307	1.91e-11	P:intracellular protein transport; P:vesicle-mediated transport; C:clathrin adaptor complex		P:GO:0006886; P:GO:0016192; C:GO:0030117; C:GO:0030131	P:intracellular protein transport; P:vesicle-mediated transport; C:membrane coat; C:clathrin adaptor complex	132	44.984	318	70	6.56	1.44	2.18763	0.941	5.394	-2.49	-5.94	DE - Mature
GZUJ98X01_(single)_trimmed_contig_13911	beta glucosidase 11	254	2.54e-33	P:carbohydrate metabolic process; F:hydrolase activity, hydrolyzing O-glycosyl compounds; C:extracellular region		P:GO:0005975; F:GO:0004553	P:carbohydrate metabolic process; F:hydrolase activity, hydrolyzing O-glycosyl compounds	153	57.594	449	29	11.19	0.72	3.95807	0.991	10.614	-4.259	-11.436	DE - Mature
GZUJ98X01_(single)_trimmed_contig_14114	retrotransposon unclassified	5179	2.21e-74	P:defense response; P:signal transduction; P:DNA integration; F:nucleic acid binding; F:ADP binding		no GO terms	no GO terms	1678	33.549	3993	1015	4.88	1.24	1.97654	0.908	3.88	-2.282	-4.501	DE - Mature
GZUJ98X01_(single)_trimmed_contig_14165	zinc mym domain containing 1	3171	0	F:nucleic acid binding; F:protein dimerization activity		no GO terms	no GO terms	2195	78.578	4424	558	8.83	1.11	2.99185	0.978	7.937	-3.293	-8.593	DE - Mature
GZUJ98X01_(single)_trimmed_contig_14437	autoinhibited h atpase	510	8.81e-25	P:obsolete ATP catabolic process; P:ATP biosynthetic process; P:cation transport; P:sister chromatid cohesion; P:homologous chromosome pairing at meiosis; P:reciprocal meiotic recombination; P:response to salt stress; P:xylem development; P:regulation of chromosome organization; P:meiotic DNA double-strand break formation; P:cell wall macromolecule metabolic process; P:meiotic chromosome segregat…	Acting on acid anhydrides	F:GO:0000166; F:GO:0046872	F:nucleotide binding; F:metal ion binding	149	32.124	342	63	4.25	0.78	2.44592	0.923	3.615	-2.747	-4.54	DE - Mature
GZUJ98X01_(single)_trimmed_contig_14534	phosphopantothenate-cysteine ligase	630	4.81e-61	P:coenzyme A biosynthetic process; P:intracellular signal transduction; F:phosphopantothenate--cysteine ligase activity; C:nucleus; C:chloroplast; C:membrane	Phosphopantothenate--cysteine ligase (CTP)	no GO terms	no GO terms	653	105.562	1443	252	14.5	2.53	2.51884	0.984	12.461	-2.824	-12.776	DE - Mature
GZUJ98X01_(single)_trimmed_contig_14589	transposon mutator sub-class	2740	4.74e-34	P:transposition, DNA-mediated; F:nucleic acid binding; F:DNA binding; F:transposase activity; F:zinc ion binding; C:cytoplasmic vesicle		no GO terms	no GO terms	1387	53.259	3036	553	7.01	1.28	2.45327	0.958	5.985	-2.763	-6.592	DE - Mature
GZUJ98X01_(single)_trimmed_contig_14601	3 -partial	1238	4.82e-28	P:DNA metabolic process; P:cellular process; F:helicase activity		no GO terms	no GO terms	247	20.07	774	65	3.96	0.33	3.58496	0.928	3.692	-3.88	-5.355	DE - Mature
GZUJ98X01_(single)_trimmed_contig_14686	receptor-like protein kinase feronia-like	1144	5.12e-60	F:protein kinase activity		no GO terms	no GO terms	858	83.849	2004	614	11.09	3.4	1.70565	0.952	8.347	-2.013	-8.586	DE - Mature
GZUJ98X01_(single)_trimmed_contig_14744	linoleate 13s-lipoxygenase 2- chloroplastic	1762	0	P:response to wounding; P:response to fungus; P:jasmonic acid biosynthetic process; P:response to jasmonic acid; P:oxylipin biosynthetic process; P:obsolete oxidation-reduction process; F:iron ion binding; F:linoleate 13S-lipoxygenase activity; C:chloroplast thylakoid membrane; C:chloroplast stroma; C:chloroplast envelope	Linoleate 13S-lipoxygenase	P:GO:0055114; F:GO:0016702; F:GO:0046872	P:obsolete oxidation-reduction process; F:oxidoreductase activity, acting on single donors with incorporation of molecular oxygen, incorporation of two atoms of oxygen; F:metal ion binding	747	42.844	2295	57	8.25	0.2	5.36632	0.986	8.086	-5.637	-9.857	DE - Mature
GZUJ98X01_(single)_trimmed_contig_14768	transposon mariner sub-class	3565	7.01e-66	P:transposition, DNA-mediated; P:DNA integration; F:DNA binding; F:transposase activity		no IPS match	no IPS match	1185	36.711	2255	590	4	1.05	1.92961	0.908	3.159	-2.24	-3.873	DE - Mature
GZUJ98X01_(single)_trimmed_contig_14978	sulfate bicarbonate oxalate exchanger and transporter sat-1	461	1.23e-36	P:sulfate transport; P:transmembrane transport; F:secondary active sulfate transmembrane transporter activity; C:plasmodesma; C:integral component of membrane		P:GO:0008272; F:GO:0015116; C:GO:0016021	P:sulfate transport; F:sulfate transmembrane transporter activity; C:integral component of membrane	157	35.742	414	29	5.69	0.4	3.83036	0.966	5.367	-4.141	-6.779	DE - Mature
GZUJ98X01_(single)_trimmed_contig_15090	serine carboxypeptidase-like 31-like	700	7.25e-57	P:proteolysis; F:serine-type carboxypeptidase activity; C:extracellular region	Acting on peptide bonds (peptidases)	P:GO:0006508; F:GO:0004185	P:proteolysis; F:serine-type carboxypeptidase activity	588	84.627	1884	182	17.04	1.65	3.36839	0.995	15.718	-3.678	-16.143	DE - Mature
GZUJ98X01_(single)_trimmed_contig_15194	cyclin-dependent kinase f-4-like	496	1.39e-37	P:protein phosphorylation; P:protein N-linked glycosylation; P:positive regulation of translation; F:cyclin-dependent protein serine/threonine kinase activity; F:protein tyrosine kinase activity; F:ATP binding; F:RNA polymerase II CTD heptapeptide repeat kinase activity; C:nucleus; C:cytoplasm	Transferring phosphorus-containing groups; [RNA-polymerase]-subunit kinase; Cyclin-dependent kinase	no IPS match	no IPS match	298	60.073	739	6	9.43	0.08	6.88111	0.988	9.377	-7.25	-11.853	DE - Mature
GZUJ98X01_(single)_trimmed_contig_15230	serine threonine-protein phosphatase 7-like protein	765	5.19e-72	F:protein serine/threonine phosphatase activity; F:zinc ion binding; C:nucleus		no IPS match	no IPS match	176	23.847	558	72	4.62	0.6	2.94486	0.95	4.139	-3.26	-5.268	DE - Mature
GZUJ98X01_(single)_trimmed_contig_15275	peroxidase-like protein	226	4.13e-32	P:response to oxidative stress; P:obsolete oxidation-reduction process; F:peroxidase activity; F:heme binding; F:metal ion binding; C:cytoplasmic vesicle	Peroxidase	P:GO:0006979; P:GO:0055114; F:GO:0004601; F:GO:0020037	P:response to oxidative stress; P:obsolete oxidation-reduction process; F:peroxidase activity; F:heme binding	98	43.058	306	37	8.57	1.04	3.04271	0.98	7.739	-3.354	-8.434	DE - Mature
GZUJ98X01_(single)_trimmed_contig_15538	probable peptide nitrate transporter at1g59740-like	2939	0	P:oligopeptide transport; P:response to nematode; P:xylem development; P:cell wall macromolecule metabolic process; F:transporter activity; C:plasma membrane; C:integral component of membrane		P:GO:0006810; F:GO:0005215; C:GO:0016020	P:transport; F:transporter activity; C:membrane	2923	101.876	7667	1783	16.51	3.84	2.10416	0.966	13.418	-2.41	-13.632	DE - Mature
GZUJ98X01_(single)_trimmed_contig_15582	albumin-2	1071	8.83e-77	F:calcium ion binding; F:heme binding		no IPS match	no IPS match	556	53.521	1529	39	9.04	0.23	5.29662	0.986	8.858	-5.599	-10.479	DE - Mature
GZUJ98X01_(single)_trimmed_contig_15646	cc-nbs-lrr resistance protein	1817	6.33e-26	P:defense response; F:nucleotide binding; F:phosphoprotein phosphatase activity; F:ATP binding; F:hydrolase activity; F:ribonucleoside triphosphate phosphatase activity; F:ADP binding		no GO terms	no GO terms	900	51.118	1953	398	6.8	1.39	2.29045	0.958	5.687	-2.601	-6.253	DE - Mature
GZUJ98X01_(single)_trimmed_contig_15690	pyrroline-5-carboxylate synthetase	2248	0	P:proline biosynthetic process; P:response to oxidative stress; P:response to desiccation; P:response to abscisic acid; P:embryo development ending in seed dormancy; P:hyperosmotic salinity response; P:root development; P:obsolete oxidation-reduction process; F:glutamate 5-kinase activity; F:glutamate-5-semialdehyde dehydrogenase activity; C:chloroplast; C:membrane	Glutamate-5-semialdehyde dehydrogenase; Glutamate 5-kinase	no GO terms	no GO terms	2421	121.1	4983	1379	14.03	3.88	1.85439	0.957	10.899	-2.159	-11.111	DE - Mature
GZUJ98X01_(single)_trimmed_contig_1577	probable leucine-rich repeat receptor-like protein kinase at1g35710-like	615	2.64e-25	P:protein phosphorylation; P:transmembrane receptor protein tyrosine kinase signaling pathway; P:epidermis development; P:embryo development; F:protein serine/threonine kinase activity; F:ATP binding	Transferring phosphorus-containing groups	no GO terms	no GO terms	403	66.553	944	110	9.72	1.13	3.10463	0.984	8.808	-3.407	-9.444	DE - Mature
GZUJ98X01_(single)_trimmed_contig_15816	o-acyltransferase wsd1	1883	0	P:glycerolipid biosynthetic process; F:diacylglycerol O-acyltransferase activity	Diacylglycerol O-acyltransferase	P:GO:0045017; F:GO:0004144	P:glycerolipid biosynthetic process; F:diacylglycerol O-acyltransferase activity	955	52.652	1930	486	6.49	1.63	1.99335	0.936	5.171	-2.296	-5.657	DE - Mature
GZUJ98X01_(single)_trimmed_contig_15856	protein	509	1.43e-45	P:carbohydrate metabolic process; P:photosynthetic electron transport in photosystem I; P:leaf morphogenesis; P:mRNA modification; P:cell differentiation; P:positive regulation of DNA-templated transcription; F:catalytic activity; F:carbohydrate binding; C:chloroplast; C:membrane		P:GO:0005975; F:GO:0003824; F:GO:0030246	P:carbohydrate metabolic process; F:catalytic activity; F:carbohydrate binding	334	66.99	1105	273	13.74	3.4	2.01478	0.963	11.004	-2.323	-11.247	DE - Mature
GZUJ98X01_(single)_trimmed_contig_15865	arf1_5 -family small gtpase	480	1.02e-16	P:intracellular protein transport; P:small GTPase mediated signal transduction; P:response to cadmium ion; F:obsolete signal transducer activity; F:transporter activity; F:copper ion binding; F:GTP binding; C:vacuole; C:plasma membrane		F:GO:0005525	F:GTP binding	145	30.5	551	56	7.27	0.74	3.29636	0.975	6.674	-3.604	-7.585	DE - Mature
GZUJ98X01_(single)_trimmed_contig_15922	gtp cyclohydrolase ii	306	2.63e-21	P:riboflavin biosynthetic process; P:mRNA modification; F:GTP cyclohydrolase II activity; F:3,4-dihydroxy-2-butanone-4-phosphate synthase activity; C:chloroplast; C:membrane	GTP cyclohydrolase II; 3,4-dihydroxy-2-butanone-4-phosphate synthase	P:GO:0009231; F:GO:0003935	P:riboflavin biosynthetic process; F:GTP cyclohydrolase II activity	106	36.487	187	42	3.87	0.87	2.15325	0.908	3.168	-2.461	-4.011	DE - Mature
GZUJ98X01_(single)_trimmed_contig_15983	tetratricopeptide repeat -containing protein	1151	4.26e-18	P:thylakoid membrane organization; P:photosystem II oxygen evolving complex assembly; C:chloroplast		no IPS match	no IPS match	556	49.347	1314	270	7.23	1.49	2.27868	0.966	6.03	-2.589	-6.562	DE - Mature
GZUJ98X01_(single)_trimmed_contig_16005	glutaredoxin	1388	3.23e-42	P:methylglyoxal catabolic process to D-lactate via S-lactoyl-glutathione; P:cell redox homeostasis; P:anther development; F:arsenate reductase (glutaredoxin) activity; F:electron transfer activity; F:protein-disulfide reductase activity	Arsenate reductase (glutathione/glutaredoxin)	P:GO:0045454; F:GO:0009055; F:GO:0015035	P:cell redox homeostasis; F:electron transfer activity; F:protein-disulfide reductase activity	810	59.991	1732	487	7.9	2.22	1.83129	0.944	6.107	-2.136	-6.47	DE - Mature
GZUJ98X01_(single)_trimmed_contig_16032	ein2 -like nramp transporter	453	1.36e-23	P:establishment of planar polarity; P:response to molecule of bacterial origin; P:lipid transport; P:intra-Golgi vesicle-mediated transport; P:response to oxidative stress; P:cell death; P:response to heat; P:response to salt stress; P:response to jasmonic acid; P:positive regulation of abscisic acid-activated signaling pathway; P:jasmonic acid and ethylene-dependent systemic resistance, ethylene…		P:GO:0006810; F:GO:0005215; C:GO:0016020	P:transport; F:transporter activity; C:membrane	120	27.711	496	96	6.93	1.34	2.37062	0.958	5.85	-2.675	-6.433	DE - Mature
GZUJ98X01_(single)_trimmed_contig_16406	polyneuridine-aldehyde esterase	1306	1.21e-95	F:methyl jasmonate esterase activity	Acting on ester bonds	no GO terms	no GO terms	1426	113.757	3553	108	17.22	0.52	5.04943	0.996	16.811	-5.346	-17.641	DE - Mature
GZUJ98X01_(single)_trimmed_contig_16460	dnaj heat shock n-terminal domain-containing protein	1145	3.55e-76	P:protein folding; P:response to stress; F:heat shock protein binding; F:unfolded protein binding; C:chloroplast; C:plastid		no GO terms	no GO terms	929	97.652	2291	326	12.67	1.8	2.81535	0.988	11.217	-3.119	-11.642	DE - Mature
GZUJ98X01_(single)_trimmed_contig_16602	cytochrome p450	1365	2.81e-56	P:tryptophan biosynthetic process; P:shade avoidance; P:induced systemic resistance; P:indoleacetic acid biosynthetic process; P:indole glucosinolate biosynthetic process; P:response to red light; P:defense response by callose deposition in cell wall; P:obsolete oxidation-reduction process; F:iron ion binding; F:electron transfer activity; F:oxidoreductase activity, acting on paired donors, with …	Acting on paired donors, with incorporation or reduction of molecular oxygen. The oxygen incorporated need not be derived from O(2)	P:GO:0055114; F:GO:0005506; F:GO:0016705; F:GO:0020037	P:obsolete oxidation-reduction process; F:iron ion binding; F:oxidoreductase activity, acting on paired donors, with incorporation or reduction of molecular oxygen; F:heme binding	695	52.301	1616	118	7.49	0.55	3.76746	0.982	7.057	-4.081	-8.152	DE - Mature
GZUJ98X01_(single)_trimmed_contig_16662	auxin response factor 4	320	4e-41	P:regulation of DNA-templated transcription; P:auxin-activated signaling pathway; P:vegetative phase change; P:abaxial cell fate specification; F:DNA binding; F:DNA-binding transcription factor activity; F:protein dimerization activity; C:nucleus		P:GO:0006355; F:GO:0046983; C:GO:0005634	P:regulation of DNA-templated transcription; F:protein dimerization activity; C:nucleus	351	106.591	767	142	15.17	2.81	2.43258	0.983	12.91	-2.739	-13.198	DE - Mature
GZUJ98X01_(single)_trimmed_contig_16788	cyclase family protein	2104	2.72e-77	P:response to salt stress; C:cell wall; C:endoplasmic reticulum; C:Golgi apparatus; C:chloroplast; C:cytoplasmic vesicle		no GO terms	no GO terms	951	47.148	2614	263	7.87	0.79	3.31644	0.981	7.23	-3.619	-8.085	DE - Mature
GZUJ98X01_(single)_trimmed_contig_16907	protein	791	2.67e-36	P:biological_process; F:molecular_function		no GO terms	no GO terms	288	37.139	725	162	5.8	1.3	2.15754	0.929	4.757	-2.468	-5.359	DE - Mature
GZUJ98X01_(single)_trimmed_contig_17066	protein phloem protein 2-like a1-like	1772	2.29e-43	P:response to insect; F:proteoglycan binding		no GO terms	no GO terms	1496	85.62	3994	513	14.27	1.83	2.96307	0.99	12.795	-3.267	-13.206	DE - Mature
GZUJ98X01_(single)_trimmed_contig_17195	udp-glucose flavonoid 3-o-glucosyltransferase 6	2492	5.69e-112	P:metabolic process; F:transferase activity; F:glycosyltransferase activity; F:hexosyltransferase activity		no GO terms	no GO terms	771	31.826	2286	32	5.81	0.08	6.18239	0.967	5.746	-6.465	-8.649	DE - Mature
GZUJ98X01_(single)_trimmed_contig_17279	ent-kaurenoic acid oxidase	1914	9.3e-27	P:gibberellin biosynthetic process; P:obsolete oxidation-reduction process; F:iron ion binding; F:electron transfer activity; F:oxygen binding; F:heme binding; F:ent-kaurenoate oxidase activity; C:mitochondrion; C:endoplasmic reticulum		P:GO:0055114; F:GO:0005506; F:GO:0016705; F:GO:0020037	P:obsolete oxidation-reduction process; F:iron ion binding; F:oxidoreductase activity, acting on paired donors, with incorporation or reduction of molecular oxygen; F:heme binding	803	42.949	1544	445	5.11	1.47	1.79751	0.908	3.919	-2.101	-4.447	DE - Mature
GZUJ98X01_(single)_trimmed_contig_17519	cytochrome p450	1866	0	P:seed development; F:monooxygenase activity; F:oxidoreductase activity, acting on paired donors, with incorporation or reduction of molecular oxygen; F:oxygen binding; F:metal ion binding; C:chloroplast		no IPS match	no IPS match	527	29.221	1620	226	5.5	0.77	2.8365	0.95	4.879	-3.148	-5.806	DE - Mature
GZUJ98X01_(single)_trimmed_contig_17796	proteasome subunit alpha	523	2.07e-76	P:gluconeogenesis; P:glycolytic process; P:ubiquitin-dependent protein catabolic process; P:response to salt stress; P:response to cadmium ion; F:nucleic acid binding; F:threonine-type endopeptidase activity; C:nucleus; C:vacuole; C:proteasome core complex, alpha-subunit complex; C:cytosolic ribosome	Acting on peptide bonds (peptidases)	P:GO:0051603; F:GO:0004298; C:GO:0005839	P:proteolysis involved in protein catabolic process; F:threonine-type endopeptidase activity; C:proteasome core complex	271	55.424	588	128	7.12	1.55	2.19961	0.941	5.868	-2.506	-6.381	DE - Mature
GZUJ98X01_(single)_trimmed_contig_17844	probable atp-dependent rna helicase dhx36-like	1042	3.69e-30	F:RNA binding; F:helicase activity; F:ATP binding		no IPS match	no IPS match	513	51.198	1098	173	6.67	1.05	2.6673	0.958	5.825	-2.972	-6.539	DE - Mature
GZUJ98X01_(single)_trimmed_contig_17862	protein	1899	0	C:extracellular region		no GO terms	no GO terms	591	31.561	1811	468	6.04	1.56	1.953	0.925	4.779	-2.258	-5.285	DE - Mature
GZUJ98X01_(single)_trimmed_contig_18147	galactinol synthase	1234	3.31e-180	P:galactose metabolic process; P:response to heat; P:response to cold; P:response to water deprivation; P:response to high light intensity; P:response to salt stress; P:response to abscisic acid; P:carbohydrate biosynthetic process; P:response to hydrogen peroxide; F:metal ion binding; F:inositol 3-alpha-galactosyltransferase activity; C:nucleus; C:cytoplasm	Inositol 3-alpha-galactosyltransferase	F:GO:0016757	F:glycosyltransferase activity	398	33.244	1018	219	5.22	1.12	2.22055	0.929	4.317	-2.523	-5	DE - Mature
GZUJ98X01_(single)_trimmed_contig_18155	binding protein	611	2.49e-16	P:biological_process; F:molecular_function; C:chloroplast		no GO terms	no GO terms	538	92.123	1357	274	14.06	2.84	2.30763	0.982	11.772	-2.614	-12.059	DE - Mature
GZUJ98X01_(single)_trimmed_contig_18279	photosystem ii protein d1	1467	0	P:DNA-templated transcription elongation; P:response to herbicide; P:photosynthetic electron transport in photosystem II; P:photosystem II assembly; F:iron ion binding; F:protein binding; F:chlorophyll binding; F:oxidoreductase activity; F:electron transporter, transferring electrons within the cyclic electron transport pathway of photosynthesis activity; C:photosystem II; C:chloroplast thylakoid…		P:GO:0009772; P:GO:0019684; F:GO:0009055; F:GO:0045156	P:photosynthetic electron transport in photosystem II; P:photosynthesis, light reaction; F:electron transfer activity; F:electron transporter, transferring electrons within the cyclic electron transport pathway of photosynthesis activity	1606	113.271	3414	735	14.73	3.17	2.2162	0.965	12.176	-2.522	-12.434	DE - Mature
GZUJ98X01_(single)_trimmed_contig_18309	beta-amylase	261	8.42e-29	P:starch catabolic process; P:response to herbivore; F:beta-amylase activity	Beta-amylase	P:GO:0000272; P:GO:0005975; F:GO:0016161	P:polysaccharide catabolic process; P:carbohydrate metabolic process; F:beta-amylase activity	307	116.08	700	185	16.98	4.49	1.91905	0.961	13.358	-2.226	-13.543	DE - Mature
GZUJ98X01_(single)_trimmed_contig_18348	metallophosphatase domain-containing protein	305	1.33e-33	C:cytoplasm		no GO terms	no GO terms	250	83.554	666	76	13.82	1.58	3.12876	0.992	12.556	-3.437	-13.018	DE - Mature
GZUJ98X01_(single)_trimmed_contig_18807	glutaredoxin	532	9.55e-43	P:cell redox homeostasis; P:anther development; F:arsenate reductase (glutaredoxin) activity; F:electron transfer activity; F:protein-disulfide reductase activity	Arsenate reductase (glutathione/glutaredoxin)	no IPS match	no IPS match	266	51.667	810	46	9.64	0.55	4.13153	0.988	9.202	-4.444	-10.219	DE - Mature
GZUJ98X01_(single)_trimmed_contig_19009	caffeic acid methyltransferase	961	1.74e-79	P:metabolic process; F:O-methyltransferase activity; F:protein dimerization activity; C:obsolete cell part	Transferring one-carbon groups	F:GO:0008171; F:GO:0046983	F:O-methyltransferase activity; F:protein dimerization activity	624	65.918	1010	293	6.65	1.93	1.78475	0.936	5.096	-2.091	-5.508	DE - Mature
GZUJ98X01_(single)_trimmed_contig_19405	phospholipase c	454	1.91e-31	P:intracellular signal transduction; F:phosphatidylinositol phospholipase C activity; F:calcium ion binding	Phosphoinositide phospholipase C	P:GO:0035556; F:GO:0004435; F:GO:0005509	P:intracellular signal transduction; F:phosphatidylinositol phospholipase C activity; F:calcium ion binding	263	59.698	775	3	10.81	0.04	8.07815	0.991	10.78	-8.319	-13.617	DE - Mature
GZUJ98X01_(single)_trimmed_contig_19470	isoflavone 2 -hydroxylase-like	423	2.95e-38	P:response to stimulus; P:obsolete oxidation-reduction process; F:monooxygenase activity; F:iron ion binding; F:oxidoreductase activity, acting on paired donors, with incorporation or reduction of molecular oxygen; F:heme binding; C:obsolete cell part		P:GO:0055114; F:GO:0005506; F:GO:0016705; F:GO:0020037	P:obsolete oxidation-reduction process; F:iron ion binding; F:oxidoreductase activity, acting on paired donors, with incorporation or reduction of molecular oxygen; F:heme binding	322	76.631	845	11	12.65	0.16	6.30492	0.993	12.522	-6.569	-14.141	DE - Mature
GZUJ98X01_(single)_trimmed_contig_19506	phd finger-containing protein	374	1.05e-38	P:gravitropism; F:metal ion binding; C:nucleus; C:plasmodesma		no IPS match	no IPS match	295	77.652	672	105	11.37	1.78	2.67528	0.979	9.944	-2.984	-10.382	DE - Mature
GZUJ98X01_(single)_trimmed_contig_19522	snare protein	249	2.26e-11	P:vesicle-mediated transport; C:integral component of membrane		no IPS match	no IPS match	213	85.414	399	79	10.14	2.01	2.33479	0.975	8.526	-2.642	-8.926	DE - Mature
GZUJ98X01_(single)_trimmed_contig_19543	receptor protein kinase clavata1	1550	1.47e-109	P:protein phosphorylation; P:transmembrane receptor protein tyrosine kinase signaling pathway; P:signal complex assembly; P:regulation of meristem structural organization; P:cell differentiation; F:obsolete signal transducer, downstream of receptor, with serine/threonine kinase activity; F:ATP binding; F:oxidoreductase activity; F:receptor serine/threonine kinase binding; F:identical protein bind…	Transferring phosphorus-containing groups	F:GO:0005515	F:protein binding	1055	70.122	1959	586	8	2.39	1.74299	0.944	6.069	-2.047	-6.405	DE - Mature
GZUJ98X01_(single)_trimmed_contig_19649	vam6 vps39-like protein	236	2.01e-19	P:carbohydrate metabolic process; P:intracellular protein transport; F:GTPase regulator activity; C:plasmodesma		no GO terms	no GO terms	49	19.686	149	10	4	0.27	3.88897	0.928	3.783	-4.203	-5.655	DE - Mature
GZUJ98X01_(single)_trimmed_contig_19689	protein phosphatase	881	2.1e-50	P:metabolic process; P:response to cold; P:response to water deprivation; P:response to abscisic acid; P:hyperosmotic salinity response; F:protein serine/threonine phosphatase activity; F:metal ion binding; C:nucleus; C:cytoplasm		no IPS match	no IPS match	1109	129.07	2441	709	17.54	5.09	1.78491	0.96	13.429	-2.09	-13.59	DE - Mature
GZUJ98X01_(single)_trimmed_contig_20326	trna-specific adenosine deaminase	1336	1.01e-80	P:metabolic process; P:embryo development ending in seed dormancy; F:zinc ion binding; F:hydrolase activity; C:chloroplast		F:GO:0003824; F:GO:0008270; F:GO:0016787	F:catalytic activity; F:zinc ion binding; F:hydrolase activity	571	44.001	1385	154	6.56	0.73	3.16773	0.966	5.977	-3.475	-6.913	DE - Mature
GZUJ98X01_(single)_trimmed_contig_20392	auxin-induced protein 5ng4	854	2.34e-69	C:membrane		C:GO:0016020	C:membrane	996	121.444	2385	600	17.68	4.45	1.99024	0.961	14.092	-2.297	-14.278	DE - Mature
GZUJ98X01_(single)_trimmed_contig_20417	prolyl oligopeptidase	2450	0	P:proteolysis; P:cellulose biosynthetic process; P:Golgi vesicle transport; F:serine-type endopeptidase activity; F:serine-type exopeptidase activity; C:cytosol; C:chloroplast	Acting on peptide bonds (peptidases)	P:GO:0006508; F:GO:0004252; F:GO:0008236; F:GO:0070008	P:proteolysis; F:serine-type endopeptidase activity; F:serine-type peptidase activity; F:serine-type exopeptidase activity	892	37.136	2225	33	5.75	0.09	5.99749	0.967	5.684	-6.381	-8.546	DE - Mature
GZUJ98X01_(single)_trimmed_contig_20461	dwnn a cchc-type zinc finger	843	8.02e-33	P:cellular process		no GO terms	no GO terms	277	32.877	747	29	5.61	0.22	4.67243	0.966	5.437	-4.993	-7.382	DE - Mature
GZUJ98X01_(single)_trimmed_contig_20564	auxin-induced protein 5ng4-like	1281	4.51e-154	P:glucosinolate biosynthetic process; C:cytoplasm; C:membrane		C:GO:0016020	C:membrane	834	66.959	2082	217	10.29	1.07	3.26556	0.987	9.428	-3.568	-10.081	DE - Mature
GZUJ98X01_(single)_trimmed_contig_2072	upf0235 protein c15orf40 homolog	843	7.75e-45	P:biological_process; F:molecular_function; C:nucleus		no GO terms	no GO terms	998	121.752	1938	426	14.55	3.2	2.18488	0.964	11.974	-2.492	-12.231	DE - Mature
GZUJ98X01_(single)_trimmed_contig_20992	cytochrome c oxidase subunit 5c-like isoform x1	485	7.18e-20	F:cytochrome-c oxidase activity; C:mitochondrial respirasome	Acting on a heme group of donors	no GO terms	no GO terms	142	30.769	310	95	4.05	1.24	1.70758	0.908	3.045	-2.012	-3.65	DE - Mature
GZUJ98X01_(single)_trimmed_contig_21029	beta- -glucanase	1374	8.39e-123	P:carbohydrate metabolic process; F:hydrolase activity, hydrolyzing O-glycosyl compounds		P:GO:0005975; F:GO:0004553	P:carbohydrate metabolic process; F:hydrolase activity, hydrolyzing O-glycosyl compounds	297	21.83	854	176	3.93	0.81	2.27854	0.923	3.281	-2.585	-4.177	DE - Mature
GZUJ98X01_(single)_trimmed_contig_21034	rna polymerase sigma factor chloroplastic mitochondrial-like	488	8.34e-52	P:DNA-templated transcription initiation; P:chloroplast organization; P:response to red light; P:photosystem II assembly; P:response to far red light; P:myo-inositol hexakisphosphate biosynthetic process; P:positive regulation of DNA-templated transcription; P:cellular response to blue light; F:DNA binding; F:DNA-binding transcription factor activity; F:DNA-directed 5'-3' RNA polymerase activity;…	DNA-directed RNA polymerase	P:GO:0006352; P:GO:0006355; F:GO:0003677; F:GO:0003700; F:GO:0016987	P:DNA-templated transcription initiation; P:regulation of DNA-templated transcription; F:DNA binding; F:DNA-binding transcription factor activity; F:sigma factor activity	522	108.402	1134	325	14.71	4.22	1.80148	0.958	11.308	-2.109	-11.503	DE - Mature
GZUJ98X01_(single)_trimmed_contig_21136	homeobox-leucine zipper protein athb-12-like	1333	4.6e-59	P:regulation of DNA-templated transcription; F:transcription cis-regulatory region binding; F:DNA-binding transcription factor activity; C:nucleus		P:GO:0006355; F:GO:0000976; F:GO:0003677; F:GO:0003700; F:GO:0043565; C:GO:0005634	P:regulation of DNA-templated transcription; F:transcription cis-regulatory region binding; F:DNA binding; F:DNA-binding transcription factor activity; F:sequence-specific DNA binding; C:nucleus	1227	94.162	3247	997	15.42	4.73	1.70489	0.958	11.599	-2.009	-11.771	DE - Mature
GZUJ98X01_(single)_trimmed_contig_21153	isocitrate dehydrogenase	241	2.07e-50	P:gluconeogenesis; P:glycolytic process; P:tricarboxylic acid cycle; P:isocitrate metabolic process; P:ubiquitin-dependent protein catabolic process; P:NADP metabolic process; P:water transport; P:hyperosmotic response; P:Golgi organization; P:response to temperature stimulus; P:photorespiration; P:defense response to bacterium; P:regulation of transport; P:response to misfolded protein; P:protea…	Isocitrate dehydrogenase (NADP(+))	P:GO:0006102; P:GO:0055114; F:GO:0004450; F:GO:0016616	P:isocitrate metabolic process; P:obsolete oxidation-reduction process; F:isocitrate dehydrogenase (NADP+) activity; F:oxidoreductase activity, acting on the CH-OH group of donors, NAD or NADP as acceptor	57	24.49	182	31	4.78	0.81	2.56102	0.945	4.125	-2.86	-5.019	DE - Mature
GZUJ98X01_(single)_trimmed_contig_21511	probable acyl-activating enzyme peroxisomal-like	267	3.92e-15	P:metabolic process; F:catalytic activity		no IPS match	no IPS match	81	28.479	396	39	9.39	0.92	3.35142	0.985	8.647	-3.65	-9.386	DE - Mature
GZUJ98X01_(single)_trimmed_contig_21651	auxin efflux carrier component	1348	5.64e-158	P:pollen development; P:auxin polar transport; P:auxin homeostasis; P:transmembrane transport; P:endoplasmic reticulum to cytosol auxin transport; F:auxin:proton symporter activity; C:endoplasmic reticulum; C:integral component of membrane		P:GO:0055085; C:GO:0016021	P:transmembrane transport; C:integral component of membrane	665	50.182	1841	30	8.65	0.14	5.9492	0.986	8.538	-6.245	-10.578	DE - Mature
GZUJ98X01_(single)_trimmed_contig_21884	PREDICTED: uncharacterized protein LOC100792266	480	3.24e-65	C:chloroplast		no GO terms	no GO terms	421	90.592	744	174	9.81	2.29	2.09891	0.954	7.962	-2.402	-8.316	DE - Mature
GZUJ98X01_(single)_trimmed_contig_22038	glutamine amidotransferase class-i domain-containing protein	1281	5.19e-122	P:protein targeting to vacuole; P:defense response; P:glucosinolate metabolic process; P:Golgi vesicle transport; P:membrane fusion; F:peptidase activity; C:mitochondrion; C:cytosol		no GO terms	no GO terms	316	25.085	887	35	4.38	0.17	4.68732	0.95	4.247	-4.969	-6.537	DE - Mature
GZUJ98X01_(single)_trimmed_contig_22437	hydroquinone glucosyltransferase	1258	5.46e-124	P:metabolic process; P:response to chemical; F:quercetin 3-O-glucosyltransferase activity		P:GO:0008152; F:GO:0016758	P:metabolic process; F:hexosyltransferase activity	869	71.05	2597	599	13.07	3.01	2.11842	0.962	10.638	-2.422	-10.91	DE - Mature
GZUJ98X01_(single)_trimmed_contig_22808	transposon mutator sub-class	601	4.88e-24	F:nucleic acid binding; C:intracellular membrane-bounded organelle		no IPS match	no IPS match	236	39.003	402	111	4.23	1.17	1.85415	0.908	3.291	-2.163	-3.938	DE - Mature
GZUJ98X01_(single)_trimmed_contig_22981	fgenesh protein 66	291	1.56e-17	P:methylglyoxal catabolic process to D-lactate via S-lactoyl-glutathione; P:cell redox homeostasis; F:arsenate reductase (glutaredoxin) activity; F:electron transfer activity; F:protein-disulfide reductase activity	Arsenate reductase (glutathione/glutaredoxin)	P:GO:0045454; F:GO:0009055; F:GO:0015035	P:cell redox homeostasis; F:electron transfer activity; F:protein-disulfide reductase activity	70	25.275	178	27	3.87	0.59	2.71355	0.923	3.4	-3.027	-4.552	DE - Mature
GZUJ98X01_(single)_trimmed_contig_23032	glutaredoxin	727	3.28e-48	P:cell redox homeostasis; P:anther development; F:arsenate reductase (glutaredoxin) activity; F:electron transfer activity; F:protein-disulfide reductase activity	Arsenate reductase (glutathione/glutaredoxin)	no IPS match	no IPS match	544	74.938	1002	251	8.73	2.19	1.99505	0.944	6.962	-2.303	-7.333	DE - Mature
GZUJ98X01_(single)_trimmed_contig_23139	hypothetical protein	769	6.24e-56	F:nucleic acid binding; F:zinc ion binding		no GO terms	no GO terms	324	42.852	658	121	5.42	1	2.43829	0.945	4.614	-2.749	-5.371	DE - Mature
GZUJ98X01_(single)_trimmed_contig_23373	para-aminobenzoate synthase-like	531	9.04e-59	P:para-aminobenzoic acid biosynthetic process; P:embryo development ending in seed dormancy; P:chorismate metabolic process; P:folic acid biosynthetic process; F:anthranilate synthase activity; F:4-amino-4-deoxychorismate synthase activity; C:chloroplast	Anthranilate synthase; Aminodeoxychorismate synthase	no GO terms	no GO terms	283	56.175	535	154	6.38	1.84	1.79385	0.925	4.897	-2.103	-5.329	DE - Mature
GZUJ98X01_(single)_trimmed_contig_23498	uncharacterized membrane protein ylr241w-like	991	1.52e-40	C:extracellular region; C:membrane; C:cytoplasmic vesicle		C:GO:0016020	C:membrane	1314	145.676	2902	784	18.54	5.01	1.88776	0.961	14.497	-2.194	-14.662	DE - Mature
GZUJ98X01_(single)_trimmed_contig_23641	JHL23C09.13	1470	6.75e-15	P:RNA-templated DNA biosynthetic process; P:DNA integration; F:nucleic acid binding; F:RNA binding; F:RNA-directed DNA polymerase activity; F:RNA-DNA hybrid ribonuclease activity		no GO terms	no GO terms	1207	85.99	3670	895	15.81	3.85	2.03791	0.965	12.696	-2.342	-12.91	DE - Mature
GZUJ98X01_(single)_trimmed_contig_23695	diacylglycerol kinase 2	202	4.91e-16	P:protein kinase C-activating G protein-coupled receptor signaling pathway; P:response to cold; P:response to wounding; P:phosphorylation; P:intracellular signal transduction; P:Golgi vesicle transport; P:leaf development; P:lateral root development; F:NAD+ kinase activity; F:diacylglycerol kinase activity; C:nucleus	NAD(+) kinase; Diacylglycerol kinase (ATP)	no IPS match	no IPS match	135	64.812	330	88	10.34	2.76	1.9055	0.953	8.117	-2.213	-8.413	DE - Mature
GZUJ98X01_(single)_trimmed_contig_23743	quinone oxidoreductase	491	8.52e-40	P:response to symbiotic fungus; P:obsolete oxidation-reduction process; F:nucleotide binding; F:alcohol dehydrogenase activity, zinc-dependent; F:zinc ion binding; C:cytosol		no IPS match	no IPS match	336	70.593	738	102	9.52	1.32	2.85042	0.982	8.457	-3.161	-9.029	DE - Mature
GZUJ98X01_(single)_trimmed_contig_23851	hydrophobic protein lti6a	435	7.34e-29	P:response to cold; P:response to water deprivation; P:response to abscisic acid; P:hyperosmotic salinity response; C:plasma membrane; C:integral component of membrane; C:cytoplasmic vesicle		no GO terms	no GO terms	161	38.616	324	69	4.72	1	2.23879	0.908	3.906	-2.537	-4.657	DE - Mature
GZUJ98X01_(single)_trimmed_contig_23908	reverse transcriptase	225	1.89e-27	P:DNA integration; F:nucleic acid binding; F:zinc ion binding		no GO terms	no GO terms	79	35.276	177	45	4.98	1.27	1.97132	0.908	3.959	-2.282	-4.569	DE - Mature
GZUJ98X01_(single)_trimmed_contig_23987	protein	605	5.88e-49	P:RNA methylation; P:mRNA export from nucleus; P:protein import into nucleus; F:RNA binding; C:nucleolus; C:cytosol		no IPS match	no IPS match	335	55.264	743	89	7.77	0.93	3.06261	0.98	7.026	-3.367	-7.792	DE - Mature
GZUJ98X01_(single)_trimmed_contig_2404	alpha-soluble nsf attachment protein	649	4.38e-32	P:intracellular protein transport; F:soluble NSF attachment protein activity; C:vacuole; C:vacuolar membrane; C:plasma membrane; C:plasmodesma; C:chloroplast; C:membrane		no GO terms	no GO terms	203	32.505	506	51	4.94	0.5	3.30451	0.952	4.537	-3.616	-5.802	DE - Mature
GZUJ98X01_(single)_trimmed_contig_24063	isovaleryl- dehydrogenase	396	8.58e-84	P:leucine catabolic process; P:response to sucrose; P:response to fructose; P:obsolete oxidation-reduction process; F:ATP binding; F:isovaleryl-CoA dehydrogenase activity; F:flavin adenine dinucleotide binding; C:mitochondrial matrix	Acting on the CH-CH group of donors	P:GO:0008152; P:GO:0055114; F:GO:0003995; F:GO:0016627; F:GO:0050660	P:metabolic process; P:obsolete oxidation-reduction process; F:acyl-CoA dehydrogenase activity; F:oxidoreductase activity, acting on the CH-CH group of donors; F:flavin adenine dinucleotide binding	360	94.313	670	85	10.71	1.36	2.97728	0.985	9.619	-3.285	-10.164	DE - Mature
GZUJ98X01_(single)_trimmed_contig_24426	protein	1739	1.04e-76	C:extracellular region; C:mitochondrion; C:plant-type cell wall; C:plasmodesma		no GO terms	no GO terms	348	20.496	879	10	3.2	0.04	6.32193	0.923	3.173	-6.764	-7.471	DE - Mature
GZUJ98X01_(single)_trimmed_contig_24447	n2227-like domain-containing protein	1017	8.67e-111	P:nucleotide biosynthetic process; C:nucleus		no GO terms	no GO terms	597	60.958	1347	309	8.38	1.92	2.12584	0.948	6.834	-2.43	-7.253	DE - Mature
GZUJ98X01_(single)_trimmed_contig_24473	leucine-rich repeat receptor-like protein kinase pxl2-like	1157	1.57e-18	P:response to molecule of bacterial origin; P:protein phosphorylation; P:transmembrane receptor protein tyrosine kinase signaling pathway; P:procambium histogenesis; P:stomatal complex morphogenesis; P:stamen development; P:obsolete oxidation-reduction process; F:protein serine/threonine kinase activity; F:ATP binding; F:oxidoreductase activity; C:plasma membrane; C:integral component of membrane…	Transferring phosphorus-containing groups	no GO terms	no GO terms	1161	102.599	2553	633	13.97	3.46	2.01349	0.963	11.175	-2.318	-11.413	DE - Mature
GZUJ98X01_(single)_trimmed_contig_24483	cellulose synthase	524	3.19e-44	P:defense response; P:signal transduction; P:plant-type primary cell wall biogenesis; P:cellulose biosynthetic process; F:zinc ion binding; F:cellulose synthase (UDP-forming) activity; F:ADP binding; C:Golgi apparatus; C:integral component of membrane	Cellulose synthase (UDP-forming)	no IPS match	no IPS match	150	29.851	337	101	4.07	1.22	1.73815	0.908	3.087	-2.044	-3.702	DE - Mature
GZUJ98X01_(single)_trimmed_contig_24525	cysteine-rich receptor-like protein kinase 29-like	1385	3.11e-144	P:phosphorylation; F:nucleotide binding; F:protein kinase activity		no IPS match	no IPS match	604	44.949	1278	355	5.84	1.62	1.84997	0.925	4.532	-2.154	-5.018	DE - Mature
GZUJ98X01_(single)_trimmed_contig_24574	non-ltr retroelement reverse transcriptase	1623	4.03e-98	F:nucleic acid binding; F:RNA-DNA hybrid ribonuclease activity	Ribonuclease H	F:GO:0003676; F:GO:0004523	F:nucleic acid binding; F:RNA-DNA hybrid ribonuclease activity	426	27.381	1104	143	4.31	0.56	2.94419	0.928	3.858	-3.255	-5.047	DE - Mature
GZUJ98X01_(single)_trimmed_contig_24606	hydroxycinnamoyl shikimate quinate hydroxycinnamoyltransferase-like protein	1593	0	P:response to nitrate; P:suberin biosynthetic process; P:nitrate transmembrane transport; P:cell wall pectin biosynthetic process; F:anthranilate N-benzoyltransferase activity; F:hydroxycinnamoyltransferase activity; C:cytoplasm	Anthranilate N-benzoyltransferase	F:GO:0016747	F:acyltransferase activity, transferring groups other than amino-acyl groups	1333	85.137	2759	758	10.96	3.01	1.86441	0.953	8.534	-2.17	-8.805	DE - Mature
GZUJ98X01_(single)_trimmed_contig_24749	octicosapeptide phox bem1p domain-containing protein	251	1.6e-19	P:ethylene biosynthetic process; P:response to chitin; F:protein binding; C:nucleus		no GO terms	no GO terms	176	72.06	492	130	12.41	3.28	1.91974	0.955	9.764	-2.226	-10.014	DE - Mature
GZUJ98X01_(single)_trimmed_contig_24991	pm27 protein	696	5.61e-52	P:nuclear-transcribed mRNA catabolic process; P:biological_process; F:molecular_function; C:nucleus		no GO terms	no GO terms	416	64.115	1129	197	10.27	1.79	2.5204	0.976	8.826	-2.825	-9.267	DE - Mature
GZUJ98X01_(single)_trimmed_contig_25000	aluminum-induced protein	1069	5.16e-149	P:response to auxin; P:response to aluminum ion; C:cytoplasm; C:plasma membrane		no GO terms	no GO terms	194	19.094	1309	351	7.75	2.08	1.89761	0.944	6.075	-2.205	-6.463	DE - Mature
GZUJ98X01_(single)_trimmed_contig_25154	cation-transporting atpase	545	3.47e-105	P:obsolete ATP catabolic process; P:cation transport; P:xenobiotic transmembrane transport; P:cellular metal ion homeostasis; P:endoplasmic reticulum to Golgi vesicle-mediated transport; P:intra-Golgi vesicle-mediated transport; P:pollen germination; P:meristem maintenance; P:pollen maturation; P:glucuronoxylan metabolic process; P:cellular response to phosphate starvation; P:xylan biosynthetic p…	Acting on acid anhydrides	P:GO:0006812; F:GO:0016887; C:GO:0016021	P:cation transport; F:ATP hydrolysis activity; C:integral component of membrane	433	80.341	910	188	10.57	2.18	2.27758	0.975	8.81	-2.581	-9.18	DE - Mature
GZUJ98X01_(single)_trimmed_contig_25276	peroxidase 2	334	8.38e-20	P:response to oxidative stress; P:obsolete oxidation-reduction process; F:peroxidase activity; F:heme binding	Peroxidase	P:GO:0006979; P:GO:0055114; F:GO:0004601; F:GO:0020037	P:response to oxidative stress; P:obsolete oxidation-reduction process; F:peroxidase activity; F:heme binding	342	97.82	904	263	17.13	4.98	1.78231	0.96	13.111	-2.087	-13.276	DE - Mature
GZUJ98X01_(single)_trimmed_contig_25288	homeobox-leucine zipper protein athb-52	606	4.81e-45	P:regulation of DNA-templated transcription; P:response to blue light; P:response to absence of light; F:DNA-binding transcription factor activity; F:sequence-specific DNA binding; C:nucleus		P:GO:0006355; F:GO:0003677; F:GO:0003700; F:GO:0043565; C:GO:0005634	P:regulation of DNA-templated transcription; F:DNA binding; F:DNA-binding transcription factor activity; F:sequence-specific DNA binding; C:nucleus	148	24.842	359	6	3.75	0.06	5.96578	0.928	3.702	-6.209	-7.229	DE - Mature
GZUJ98X01_(single)_trimmed_contig_25295	myosin-j heavy chain-like	217	1.08e-36	P:mRNA splicing, via spliceosome; F:cytoskeletal motor activity; F:ATP binding; C:spliceosomal complex; C:plasma membrane; C:cell plate; C:chloroplast; C:phragmoplast; C:myosin complex		F:GO:0003774; F:GO:0005524; C:GO:0016459	F:cytoskeletal motor activity; F:ATP binding; C:myosin complex	179	78.954	417	125	12.17	3.65	1.73736	0.955	9.222	-2.044	-9.446	DE - Mature
GZUJ98X01_(single)_trimmed_contig_25347	acid phosphatase 1	566	1.23e-58	F:acid phosphatase activity; C:vacuolar membrane; C:cytosol	Acid phosphatase	F:GO:0003993	F:acid phosphatase activity	195	34.913	543	31	6.07	0.35	4.11627	0.967	5.797	-4.437	-7.3	DE - Mature
GZUJ98X01_(single)_trimmed_contig_2538	fggy carbohydrate kinase domain-containing isoform 2	591	1.02e-84	P:carbohydrate metabolic process; F:phosphotransferase activity, alcohol group as acceptor		P:GO:0005975; F:GO:0016773	P:carbohydrate metabolic process; F:phosphotransferase activity, alcohol group as acceptor	635	108.865	1393	294	14.92	3.15	2.24382	0.965	12.383	-2.55	-12.643	DE - Mature
GZUJ98X01_(single)_trimmed_contig_25460	purine permease	1860	2.21e-123	P:purine nucleobase transport; P:cytokinin transport; P:nucleobase-containing compound transport; P:cellular response to phosphate starvation; P:regulation of phosphorus metabolic process; F:purine nucleobase transmembrane transporter activity; F:purine nucleoside transmembrane transporter activity; C:integral component of plasma membrane; C:chloroplast		C:GO:0016020	C:membrane	1017	56.199	2026	512	6.9	1.74	1.98751	0.936	5.49	-2.29	-5.948	DE - Mature
GZUJ98X01_(single)_trimmed_contig_25683	calcineurin b-like protein-interacting protein kinase	1509	1.14e-95	P:protein phosphorylation; P:signal transduction; F:calmodulin-dependent protein kinase activity; F:ATP binding	Calcium/calmodulin-dependent protein kinase	P:GO:0006468; P:GO:0007165; F:GO:0004672; F:GO:0005524; F:GO:0016772	P:protein phosphorylation; P:signal transduction; F:protein kinase activity; F:ATP binding; F:transferase activity, transferring phosphorus-containing groups	624	42.553	1877	73	7.87	0.31	4.66602	0.982	7.632	-4.99	-9.119	DE - Mature
GZUJ98X01_(single)_trimmed_contig_25755	calcium-binding protein cml27	266	2.41e-24	P:response to cold; P:obsolete cellular process involved in reproduction; P:root hair elongation; P:pollen tube development; F:calcium ion binding; C:nucleus; C:vacuole; C:plasma membrane		F:GO:0005509	F:calcium ion binding	99	36.184	252	53	6	1.26	2.25154	0.929	4.981	-2.555	-5.598	DE - Mature
GZUJ98X01_(single)_trimmed_contig_25758	protein	1321	8.68e-174	P:response to oxidative stress; P:obsolete oxidation-reduction process; F:peroxidase activity; F:heme binding	Peroxidase	P:GO:0006979; P:GO:0055114; F:GO:0004601; F:GO:0020037	P:response to oxidative stress; P:obsolete oxidation-reduction process; F:peroxidase activity; F:heme binding	548	42.895	1568	94	7.51	0.45	4.06082	0.982	7.155	-4.366	-8.382	DE - Mature
GZUJ98X01_(single)_trimmed_contig_25768	ribonuclease h-like protein	473	3.47e-13	P:biological_process; C:nucleus		no IPS match	no IPS match	118	25.92	349	57	4.67	0.76	2.61935	0.945	4.057	-2.92	-4.998	DE - Mature
GZUJ98X01_(single)_trimmed_contig_25984	gras family transcription factor	1125	1.58e-165	P:regulation of DNA-templated transcription; C:obsolete intracellular part		no GO terms	no GO terms	583	57.7	1282	297	7.21	1.67	2.11015	0.941	5.866	-2.416	-6.344	DE - Mature
GZUJ98X01_(single)_trimmed_contig_25986	protein	1542	1.51e-24	C:chloroplast		no GO terms	no GO terms	506	34.747	1078	315	4.43	1.29	1.77994	0.908	3.382	-2.081	-3.971	DE - Mature
GZUJ98X01_(single)_trimmed_contig_26015	sc3 protein	438	4.84e-13	P:endocytosis; C:membrane; C:obsolete cell part		no IPS match	no IPS match	122	28.808	326	28	4.71	0.4	3.55766	0.95	4.388	-3.847	-5.835	DE - Mature
GZUJ98X01_(single)_trimmed_contig_26140	ethylene-responsive transcription factor 1a	745	7.88e-61	P:response to stress; P:hormone-mediated signaling pathway; P:response to chitin; P:positive regulation of DNA-templated transcription; F:DNA binding; F:DNA-binding transcription factor activity; C:nucleus		P:GO:0006355; F:GO:0003677; F:GO:0003700	P:regulation of DNA-templated transcription; F:DNA binding; F:DNA-binding transcription factor activity	443	61.293	1192	310	10.13	2.63	1.9455	0.953	8.004	-2.249	-8.314	DE - Mature
GZUJ98X01_(single)_trimmed_contig_26221	ribosomal protein	1582	5.28e-156	F:hydrolase activity, acting on ester bonds		F:GO:0016788	F:hydrolase activity, acting on ester bonds	519	34.629	1120	242	4.48	0.97	2.20744	0.908	3.701	-2.516	-4.476	DE - Mature
GZUJ98X01_(single)_trimmed_contig_26263	far-red impaired response protein	1957	1.12e-97	P:response to red or far red light; F:zinc ion binding; C:nucleus		no GO terms	no GO terms	554	28.844	1236	92	4	0.3	3.73697	0.928	3.76	-4.054	-5.529	DE - Mature
GZUJ98X01_(single)_trimmed_contig_26312	ent-kaurenoic acid oxidase	815	4.36e-60	P:gibberellin biosynthetic process; P:obsolete oxidation-reduction process; F:iron ion binding; F:electron transfer activity; F:oxygen binding; F:heme binding; F:ent-kaurenoate oxidase activity; C:mitochondrion; C:endoplasmic reticulum		P:GO:0055114; F:GO:0005506; F:GO:0016705; F:GO:0020037	P:obsolete oxidation-reduction process; F:iron ion binding; F:oxidoreductase activity, acting on paired donors, with incorporation or reduction of molecular oxygen; F:heme binding	801	100.525	1772	531	13.76	4.12	1.73976	0.956	10.435	-2.045	-10.634	DE - Mature
GZUJ98X01_(single)_trimmed_contig_26345	protein	578	4.09e-42	P:RNA methylation; P:mRNA export from nucleus; P:protein import into nucleus; F:RNA binding; C:nucleolus; C:cytosol		no IPS match	no IPS match	612	112.151	1152	214	12.62	2.34	2.43113	0.98	10.729	-2.734	-11.072	DE - Mature
GZUJ98X01_(single)_trimmed_contig_26413	dehydrin 4	1039	1.9e-11	P:response to stress; P:response to water; P:terpenoid biosynthetic process		no IPS match	no IPS match	534	52.397	2777	154	16.92	0.94	4.16993	0.996	16.173	-4.478	-16.781	DE - Mature
GZUJ98X01_(single)_trimmed_contig_26587	pentatricopeptide repeat-containing	257	7.37e-28	P:biological_process; F:molecular_function		no GO terms	no GO terms	214	83.883	678	57	16.7	1.4	3.57635	0.996	15.576	-3.878	-16.052	DE - Mature
GZUJ98X01_(single)_trimmed_contig_26936	u-box domain-containing protein 5-like	389	1.68e-24	P:protein ubiquitination; F:ubiquitin-protein transferase activity; F:ligase activity; C:ubiquitin ligase complex		no IPS match	no IPS match	103	28.969	235	28	3.82	0.46	3.05387	0.923	3.458	-3.375	-4.832	DE - Mature
GZUJ98X01_(single)_trimmed_contig_27148	mitogen-activated protein kinase 2	308	2.61e-66	P:MAPK cascade; P:cell morphogenesis; P:protein phosphorylation; P:protein targeting to membrane; P:positive regulation of flavonoid biosynthetic process; P:regulation of plant-type hypersensitive response; P:cell growth; P:response to hydrogen peroxide; P:Golgi vesicle transport; F:MAP kinase activity; F:ATP binding; C:nucleus	Mitogen-activated protein kinase	no GO terms	no GO terms	66	25.175	204	39	4.19	0.8	2.38888	0.923	3.547	-2.693	-4.454	DE - Mature
GZUJ98X01_(single)_trimmed_contig_27167	acyl-protein thioesterase	492	1.5e-85	P:regulation of plant-type hypersensitive response; P:defense response to other organism; F:retinyl-palmitate esterase activity; F:carboxylic ester hydrolase activity; F:methyl indole-3-acetate esterase activity; F:methyl salicylate esterase activity; F:methyl jasmonate esterase activity; C:plasma membrane	Carboxylesterase; Acting on ester bonds	F:GO:0016787	F:hydrolase activity	173	34.752	407	81	5.24	1.04	2.33298	0.945	4.397	-2.635	-5.126	DE - Mature
GZUJ98X01_(single)_trimmed_contig_27274	plant-specific domain tigr01589 family protein	781	2.39e-31	P:fatty acid beta-oxidation; P:developmental process; C:chloroplast		no GO terms	no GO terms	369	49.031	750	23	6.08	0.19	5	0.967	5.933	-5.333	-7.977	DE - Mature
GZUJ98X01_(single)_trimmed_contig_27300	cytochrome p450	357	6.47e-38	P:obsolete oxidation-reduction process; F:iron ion binding; F:electron transfer activity; F:heme binding; F:aromatase activity	Unspecific monooxygenase	P:GO:0055114; F:GO:0005506; F:GO:0016705; F:GO:0020037	P:obsolete oxidation-reduction process; F:iron ion binding; F:oxidoreductase activity, acting on paired donors, with incorporation or reduction of molecular oxygen; F:heme binding	168	49.796	476	18	8.44	0.32	4.7211	0.986	8.188	-5.031	-9.61	DE - Mature
GZUJ98X01_(single)_trimmed_contig_2730	udp-glycosyltransferase 85a2-like	1591	2.73e-116	P:metabolic process; F:hexosyltransferase activity		P:GO:0008152; F:GO:0016758	P:metabolic process; F:hexosyltransferase activity	1697	107.473	4679	1208	18.62	4.81	1.95274	0.961	14.74	-2.26	-14.912	DE - Mature
GZUJ98X01_(single)_trimmed_contig_27346	two-component response regulator arr2	1899	8.86e-87	P:regulation of DNA-templated transcription; F:DNA binding; F:chromatin binding; F:DNA-binding transcription factor activity; C:nucleus		no GO terms	no GO terms	504	27.115	1420	89	4.73	0.3	3.97881	0.952	4.497	-4.302	-6.223	DE - Mature
GZUJ98X01_(single)_trimmed_contig_27371	alpha subunit	3176	1.24e-13	P:urea catabolic process; F:urease activity; F:nickel cation binding; C:cytoplasm	Urease	no IPS match	no IPS match	994	31.734	2302	489	4.59	0.97	2.24244	0.908	3.803	-2.541	-4.574	DE - Mature
GZUJ98X01_(single)_trimmed_contig_27408	gdsl esterase lipase at4g10955-like	1509	8.36e-108	P:lipid metabolic process; F:triglyceride lipase activity; F:hydrolase activity		no IPS match	no IPS match	782	54.485	1879	128	7.88	0.54	3.86716	0.982	7.454	-4.182	-8.547	DE - Mature
GZUJ98X01_(single)_trimmed_contig_27467	xyloglucan endotransglucosylase hydrolase protein 2	1338	4.1e-150	P:cellular glucan metabolic process; P:cell wall organization or biogenesis; F:cellulase activity; F:xyloglucan:xyloglucosyl transferase activity; C:cell wall; C:apoplast	Xyloglucan:xyloglucosyl transferase; Cellulase	P:GO:0005975; P:GO:0006073; F:GO:0004553; F:GO:0016762; C:GO:0005618; C:GO:0048046	P:carbohydrate metabolic process; P:cellular glucan metabolic process; F:hydrolase activity, hydrolyzing O-glycosyl compounds; F:xyloglucan:xyloglucosyl transferase activity; C:cell wall; C:apoplast	784	59.627	1815	206	8.59	0.97	3.1466	0.98	7.805	-3.445	-8.531	DE - Mature
GZUJ98X01_(single)_trimmed_contig_27499	nucleotide pyrophosphatase	229	3.64e-36	P:regulation of carbohydrate metabolic process; F:acid phosphatase activity; F:protein serine/threonine phosphatase activity; F:metal ion binding; C:extracellular region; C:mitochondrion; C:endosome; C:Golgi apparatus; C:trans-Golgi network; C:chloroplast; C:cytoplasmic vesicle	Acid phosphatase	no GO terms	no GO terms	70	29.275	284	7	7.85	0.19	5.36862	0.982	7.7	-5.648	-9.55	DE - Mature
GZUJ98X01_(single)_trimmed_contig_27504	beta-amylase	366	5.48e-63	P:polysaccharide catabolic process; F:beta-amylase activity	Beta-amylase	P:GO:0000272; P:GO:0005975; F:GO:0016161	P:polysaccharide catabolic process; P:carbohydrate metabolic process; F:beta-amylase activity	289	84.956	854	229	14.77	3.96	1.8991	0.959	11.576	-2.205	-11.784	DE - Mature
GZUJ98X01_(single)_trimmed_contig_27505	a chain crystal structures of soybean beta-amylase reacted with beta-maltose and maltal: active site components and their apparent role in catalysis	293	4.36e-28	P:polysaccharide catabolic process; F:beta-amylase activity	Beta-amylase	P:GO:0000272; P:GO:0005975; F:GO:0016161	P:polysaccharide catabolic process; P:carbohydrate metabolic process; F:beta-amylase activity	162	57.754	458	101	9.9	2.18	2.1831	0.957	8.136	-2.487	-8.508	DE - Mature
GZUJ98X01_(single)_trimmed_contig_27565	PREDICTED: uncharacterized protein LOC100784188	715	3.82e-14	P:thylakoid membrane organization; P:photosystem II oxygen evolving complex assembly		no IPS match	no IPS match	215	32.554	621	73	5.5	0.65	3.08092	0.952	4.979	-3.395	-6.026	DE - Mature
GZUJ98X01_(single)_trimmed_contig_27581	rhomboid-like protein 12	228	3.85e-13	P:proteolysis; F:serine-type endopeptidase activity; C:mitochondrion; C:integral component of membrane	Acting on peptide bonds (peptidases)	no GO terms	no GO terms	77	33.474	237	40	6.58	1.11	2.56753	0.958	5.686	-2.873	-6.371	DE - Mature
GZUJ98X01_(single)_trimmed_contig_28101	kda class vi heat shock	706	5.64e-66	P:response to heat; P:response to high light intensity; P:response to hydrogen peroxide; C:cytoplasm		no IPS match	no IPS match	450	65.592	1202	187	10.78	1.68	2.68182	0.979	9.428	-2.99	-9.891	DE - Mature
GZUJ98X01_(single)_trimmed_contig_28362	ethylene-responsive transcription factor 1b-like	1219	2.75e-32	P:regulation of DNA-templated transcription; F:DNA binding; F:DNA-binding transcription factor activity		P:GO:0006355; F:GO:0003677; F:GO:0003700	P:regulation of DNA-templated transcription; F:DNA binding; F:DNA-binding transcription factor activity	463	38.339	1168	228	6.07	1.18	2.36291	0.958	5.112	-2.663	-5.764	DE - Mature
GZUJ98X01_(single)_trimmed_contig_28571	probable xyloglucan endotransglucosylase hydrolase protein 8-like	1161	5.87e-138	P:cellular glucan metabolic process; F:hydrolase activity, hydrolyzing O-glycosyl compounds; F:xyloglucan:xyloglucosyl transferase activity; C:cell wall; C:cytoplasmic vesicle; C:apoplast	Xyloglucan:xyloglucosyl transferase	P:GO:0005975; P:GO:0006073; F:GO:0004553; F:GO:0016762; C:GO:0005618; C:GO:0048046	P:carbohydrate metabolic process; P:cellular glucan metabolic process; F:hydrolase activity, hydrolyzing O-glycosyl compounds; F:xyloglucan:xyloglucosyl transferase activity; C:cell wall; C:apoplast	571	50.966	1327	333	7.24	1.82	1.99205	0.936	5.771	-2.301	-6.213	DE - Mature
GZUJ98X01_(single)_trimmed_contig_28633	unknown	542	7.45e-11	P:endoplasmic reticulum to Golgi vesicle-mediated transport; C:cis-Golgi network		P:GO:0006888; C:GO:0005801	P:endoplasmic reticulum to Golgi vesicle-mediated transport; C:cis-Golgi network	126	23.38	364	2	4.25	0.02	7.73132	0.95	4.236	-7.814	-8.888	DE - Mature
GZUJ98X01_(single)_trimmed_contig_28645	wall-associated receptor kinase-like 9-like	1203	4.96e-111	P:obsolete activation of MAPKK activity; P:response to fungus; P:response to zinc ion; P:response to nickel cation; P:response to cadmium ion; F:MAP kinase kinase kinase activity; F:calcium ion binding; F:ATP binding; F:polysaccharide binding; C:plasma membrane; C:plant-type cell wall; C:cell surface; C:integral component of membrane	Mitogen-activated protein kinase kinase kinase; Transferring phosphorus-containing groups	P:GO:0006468; F:GO:0004672; F:GO:0004674; F:GO:0005524; F:GO:0016772	P:protein phosphorylation; F:protein kinase activity; F:protein serine/threonine kinase activity; F:ATP binding; F:transferase activity, transferring phosphorus-containing groups	524	45.221	1018	228	5.36	1.2	2.1592	0.929	4.39	-2.465	-5.034	DE - Mature
GZUJ98X01_(single)_trimmed_contig_28646	wall-associated receptor kinase-like 8-like	1337	1.71e-46	F:transferase activity, transferring phosphorus-containing groups; F:polysaccharide binding		F:GO:0030247	F:polysaccharide binding	443	33.797	1003	265	4.75	1.25	1.926	0.908	3.737	-2.226	-4.35	DE - Mature
GZUJ98X01_(single)_trimmed_contig_28811	cysteine-rich receptor-like protein kinase 25-like	925	1.04e-40	F:kinase activity		no GO terms	no GO terms	298	33.274	891	260	6.1	1.78	1.77693	0.925	4.662	-2.083	-5.106	DE - Mature
GZUJ98X01_(single)_trimmed_contig_28885	cationic peroxidase 1-like	1224	1.81e-124	P:hydrogen peroxide catabolic process; P:obsolete oxidation-reduction process; F:peroxidase activity; F:heme binding; F:metal ion binding; C:extracellular region; C:cytoplasmic vesicle	Peroxidase	P:GO:0006979; P:GO:0055114; F:GO:0004601; F:GO:0020037	P:response to oxidative stress; P:obsolete oxidation-reduction process; F:peroxidase activity; F:heme binding	462	37.76	1033	194	5.34	1	2.41684	0.945	4.534	-2.719	-5.287	DE - Mature
GZUJ98X01_(single)_trimmed_contig_28946	ubiquitin-conjugating enzyme	800	3.12e-85	P:ubiquitin-dependent protein catabolic process; P:UV protection; P:vegetative to reproductive phase transition of meristem; P:histone H2B ubiquitination; F:ubiquitin-protein transferase activity; C:nucleus; C:cytosol	Forming carbon-nitrogen bonds	no GO terms	no GO terms	259	33.005	576	161	4.56	1.27	1.84421	0.908	3.53	-2.145	-4.131	DE - Mature
GZUJ98X01_(single)_trimmed_contig_28988	ring-h2 finger protein	1064	1.89e-23	P:metabolic process; P:response to chitin; P:regulation of defense response; P:intracellular signal transduction; P:cellular response to organic substance; P:defense response to other organism; P:cellular response to oxygen-containing compound; F:protein binding; F:zinc ion binding		F:GO:0005515; F:GO:0008270	F:protein binding; F:zinc ion binding	292	28.358	804	64	4.78	0.38	3.65294	0.95	4.479	-3.957	-5.976	DE - Mature
GZUJ98X01_(single)_trimmed_contig_29142	hsf domain class transcription factor	880	5.12e-26	P:regulation of DNA-templated transcription; P:toxin catabolic process; P:response to heat; F:DNA-binding transcription factor activity; F:sequence-specific DNA binding; C:nucleus		P:GO:0006355; P:GO:0009408; F:GO:0003700; F:GO:0043565; C:GO:0005634	P:regulation of DNA-templated transcription; P:response to heat; F:DNA-binding transcription factor activity; F:sequence-specific DNA binding; C:nucleus	274	32.207	858	193	6.17	1.39	2.15019	0.941	5.053	-2.458	-5.619	DE - Mature
GZUJ98X01_(single)_trimmed_contig_29307	protein transparent testa 12-like	629	4.5e-31	P:xenobiotic transmembrane transport; P:fruit ripening; F:antiporter activity; F:xenobiotic transmembrane transporter activity; C:plasma membrane		no GO terms	no GO terms	662	110.386	1330	316	13.39	3.18	2.07406	0.962	10.821	-2.379	-11.079	DE - Mature
GZUJ98X01_(single)_trimmed_contig_29480	hypothetical protein	1250	1.09e-15	P:RNA-templated DNA biosynthetic process; F:RNA binding; F:RNA-directed DNA polymerase activity		no IPS match	no IPS match	464	38.653	1145	182	5.8	0.92	2.65635	0.958	5.057	-2.959	-5.859	DE - Mature
GZUJ98X01_(single)_trimmed_contig_29490	serine carboxypeptidase-like 31-like	1622	1.19e-116	P:proteolysis; F:serine-type carboxypeptidase activity; C:extracellular region	Acting on peptide bonds (peptidases)	P:GO:0006508; F:GO:0004185	P:proteolysis; F:serine-type carboxypeptidase activity	1369	86.621	3529	387	13.77	1.51	3.18891	0.992	12.561	-3.495	-13.038	DE - Mature
GZUJ98X01_(single)_trimmed_contig_29492	conserved hypothetical protein	1177	1.48e-19	P:autophagy; P:biological_process; P:response to salt stress; F:molecular_function; C:nucleus		no IPS match	no IPS match	977	85.902	2149	538	11.56	2.89	2	0.955	9.224	-2.304	-9.508	DE - Mature
GZUJ98X01_(single)_trimmed_contig_29536	udp-glycosyltransferase 85a2	348	8.19e-35	P:protein targeting to membrane; P:metabolic process; P:salicylic acid mediated signaling pathway; P:jasmonic acid mediated signaling pathway; P:regulation of plant-type hypersensitive response; P:endoplasmic reticulum unfolded protein response; F:glucuronosyltransferase activity; F:trans-zeatin O-beta-D-glucosyltransferase activity; F:cis-zeatin O-beta-D-glucosyltransferase activity; C:nucleus; …	Glucuronosyltransferase; Trans-zeatin O-beta-D-glucosyltransferase; Cis-zeatin O-beta-D-glucosyltransferase	P:GO:0008152; F:GO:0016758	P:metabolic process; F:hexosyltransferase activity	294	84.365	914	218	16.63	3.97	2.06658	0.966	13.429	-2.374	-13.637	DE - Mature
GZUJ98X01_(single)_trimmed_contig_29812	probable leucine-rich repeat receptor-like protein kinase at1g35710-like	2108	0	P:phosphorylation; F:kinase activity; F:oxidoreductase activity; C:obsolete cell part		no IPS match	no IPS match	722	35.376	1486	368	4.46	1.11	2.00648	0.908	3.571	-2.32	-4.258	DE - Mature
GZUJ98X01_(single)_trimmed_contig_29989	dctp pyrophosphatase 1	742	6.26e-50	F:hydrolase activity; C:cytoplasm		no GO terms	no GO terms	356	49.666	827	100	7.06	0.85	3.05413	0.974	6.37	-3.354	-7.199	DE - Mature
GZUJ98X01_(single)_trimmed_contig_30102	auxin-responsive family protein	692	4.44e-20	P:response to auxin; P:response to red light; P:response to far red light; C:mitochondrion; C:chloroplast		no GO terms	no GO terms	376	55.91	971	97	8.88	0.89	3.31868	0.985	8.171	-3.629	-8.941	DE - Mature
GZUJ98X01_(single)_trimmed_contig_30392	bromodomain protein	3299	3.19e-41	P:histone acetylation; F:DNA binding; F:histone acetyltransferase activity; C:nucleus; C:plastid	Histone acetyltransferase	no IPS match	no IPS match	1037	32.668	2284	478	4.38	0.92	2.25123	0.908	3.643	-2.562	-4.454	DE - Mature
GZUJ98X01_(single)_trimmed_contig_30417	nad-dependent gfo idh family	224	1.87e-18	P:obsolete oxidation-reduction process; F:oxidoreductase activity; C:cytosol; C:plasma membrane		no IPS match	no IPS match	110	53.192	231	21	6.53	0.59	3.4683	0.975	6.053	-3.765	-7.128	DE - Mature
GZUJ98X01_(single)_trimmed_contig_30578	protein	1286	4.56e-147	C:plant-type cell wall		no GO terms	no GO terms	746	59.212	1959	181	9.64	0.89	3.43716	0.985	8.929	-3.742	-9.682	DE - Mature
GZUJ98X01_(single)_trimmed_contig_3061	glycosyl hydrolase family 10 expressed	2217	8.5e-32	P:carbohydrate metabolic process; F:hydrolase activity, hydrolyzing O-glycosyl compounds; C:extracellular region; C:mitochondrion		no GO terms	no GO terms	1697	77.572	3356	482	9.58	1.38	2.79536	0.982	8.476	-3.106	-9.027	DE - Mature
GZUJ98X01_(single)_trimmed_contig_30789	udp-glycosyltransferase 85a1	400	9.35e-14	F:UDP-glucosyltransferase activity		no GO terms	no GO terms	117	30.28	277	60	4.38	0.95	2.20493	0.908	3.618	-2.513	-4.405	DE - Mature
GZUJ98X01_(single)_trimmed_contig_30840	u-box domain-containing protein 42	1644	1.38e-158	F:binding; F:ligase activity; C:nucleus		F:GO:0005488	F:binding	533	35.58	1118	323	4.31	1.24	1.79735	0.908	3.301	-2.097	-3.911	DE - Mature
GZUJ98X01_(single)_trimmed_contig_30868	wall-associated receptor kinase 2-like	1125	1.34e-53	P:biological_process; P:cellular process; P:response to stimulus; F:calcium ion binding; F:protein binding; F:transferase activity, transferring phosphorus-containing groups; F:polysaccharide binding		F:GO:0005509; F:GO:0005515; F:GO:0030247	F:calcium ion binding; F:protein binding; F:polysaccharide binding	882	86.946	2037	446	11.46	2.51	2.19085	0.96	9.439	-2.497	-9.764	DE - Mature
GZUJ98X01_(single)_trimmed_contig_31324	probable -trehalose-phosphate synthase	287	3.19e-48	P:trehalose biosynthetic process; P:glucose catabolic process; F:alpha,alpha-trehalose-phosphate synthase (UDP-forming) activity; F:trehalose-phosphatase activity; C:nucleus; C:cytosol	Alpha,alpha-trehalose-phosphate synthase (UDP-forming); Trehalose-phosphatase	P:GO:0005992; F:GO:0003824	P:trehalose biosynthetic process; F:catalytic activity	85	29.436	212	52	4.68	1.15	2.02487	0.908	3.751	-2.333	-4.418	DE - Mature
GZUJ98X01_(single)_trimmed_contig_31373	seed maturation protein lea 4	916	1.42e-18	P:response to stress; P:response to abiotic stimulus; P:embryo development; P:seed development		P:GO:0009790	P:embryo development	272	30.039	905	38	6.25	0.26	4.58727	0.975	6.046	-4.88	-7.77	DE - Mature
GZUJ98X01_(single)_trimmed_contig_31602	saur-like auxin-responsive protein	332	2.34e-19	P:response to cold; P:response to auxin; P:response to chitin; P:defense response to bacterium; C:mitochondrion; C:plasma membrane; C:chloroplast		no GO terms	no GO terms	115	32.247	420	109	8.01	2.08	1.94522	0.944	6.332	-2.252	-6.72	DE - Mature
GZUJ98X01_(single)_trimmed_contig_32393	homocysteine s-methyltransferase	765	6.15e-64	P:RNA splicing, via endonucleolytic cleavage and ligation; P:DNA replication; P:DNA methylation; P:cell population proliferation; P:methionine biosynthetic process; P:RNAi-mediated antiviral immune response; P:vegetative phase change; P:S-methylmethionine cycle; P:post-translational protein modification; P:positive regulation of DNA-templated transcription; P:histone H3-K9 methylation; F:S-adenos…	Homocysteine S-methyltransferase	no GO terms	no GO terms	243	32.844	616	135	5.1	1.12	2.187	0.929	4.197	-2.496	-4.883	DE - Mature
GZUJ98X01_(single)_trimmed_contig_32442	ethylene receptor	274	3.77e-41	P:response to molecule of bacterial origin; P:regulation of DNA-templated transcription; P:signal transduction; P:response to heat; P:response to insect; P:response to salt stress; P:cytokinin metabolic process; P:detection of ethylene stimulus; P:response to auxin; P:response to abscisic acid; P:response to gibberellin; P:negative regulation of ethylene-activated signaling pathway; P:regulation …	Transferring phosphorus-containing groups	F:GO:0005524	F:ATP binding	263	97.23	634	66	14.65	1.52	3.26876	0.993	13.424	-3.57	-13.891	DE - Mature
GZUJ98X01_(single)_trimmed_contig_32566	mate efflux family protein	383	3.11e-40	P:xenobiotic transmembrane transport; F:antiporter activity; F:xenobiotic transmembrane transporter activity; C:plasma membrane; C:plastid		no GO terms	no GO terms	182	47.337	494	89	8.17	1.47	2.47452	0.966	6.98	-2.779	-7.513	DE - Mature
GZUJ98X01_(single)_trimmed_contig_32602	replication factor a protein	558	5.36e-26	P:telomere maintenance; P:DNA repair; P:DNA duplex unwinding; F:DNA binding; F:DNA helicase activity; F:helicase activity; F:ATP binding		no IPS match	no IPS match	161	27.93	491	41	5.57	0.47	3.56694	0.966	5.198	-3.888	-6.491	DE - Mature
GZUJ98X01_(single)_trimmed_contig_32657	cytochrome p450	669	4.41e-36	P:iron ion transport; P:cellular response to iron ion starvation; P:response to nitrate; P:nitrate transmembrane transport; F:oxidoreductase activity; F:oxygen binding; F:metal ion binding; C:mitochondrion; C:cytoplasmic vesicle		no IPS match	no IPS match	142	21.067	383	60	3.62	0.57	2.66696	0.923	3.167	-2.98	-4.349	DE - Mature
GZUJ98X01_(single)_trimmed_contig_32682	metal-nicotianamine transporter ysl1	2412	0	P:oligopeptide transport; P:response to iron ion; P:iron ion transmembrane transport; P:seed development; F:iron ion transmembrane transporter activity; F:binding; F:oligopeptide transmembrane transporter activity; F:iron-nicotianamine transmembrane transporter activity; C:plasma membrane		P:GO:0055085	P:transmembrane transport	655	28.004	1465	233	3.85	0.61	2.65798	0.923	3.353	-2.958	-4.471	DE - Mature
GZUJ98X01_(single)_trimmed_contig_32876	transposon mutator sub-class	2470	2.86e-61	P:transposition, DNA-mediated; F:nucleic acid binding; F:DNA binding; F:transposase activity; F:zinc ion binding; C:cytoplasmic vesicle		no GO terms	no GO terms	617	25.999	1660	93	4.25	0.24	4.14636	0.95	4.065	-4.464	-6.037	DE - Mature
GZUJ98X01_(single)_trimmed_contig_33299	methenyltetrahydrofolate synthase domain-containing	214	1.79e-34	P:maltose metabolic process; P:folic acid-containing compound biosynthetic process; P:carotenoid biosynthetic process; P:starch biosynthetic process; F:ATP binding; F:5-formyltetrahydrofolate cyclo-ligase activity; C:chloroplast	5-formyltetrahydrofolate cyclo-ligase	P:GO:0009396; F:GO:0005524; F:GO:0030272	P:folic acid-containing compound biosynthetic process; F:ATP binding; F:5-formyltetrahydrofolate cyclo-ligase activity	263	117.523	648	191	19.17	5.65	1.76253	0.961	14.609	-2.068	-14.755	DE - Mature
GZUJ98X01_(single)_trimmed_contig_33468	terpenoid cylase protein prenyltransferase alpha-alpha toroid	1024	1.71e-18	F:hydrolase activity, acting on ester bonds; C:mitochondrion; C:ribosome		no GO terms	no GO terms	384	38.874	914	8	5.65	0.05	6.82018	0.967	5.615	-7.142	-9.085	DE - Mature
GZUJ98X01_(single)_trimmed_contig_33495	phosphoinositide phospholipase c 2	1099	5.89e-44	P:lipid metabolic process; P:response to cold; P:response to water deprivation; P:response to salt stress; P:response to abscisic acid; P:actin filament-based movement; P:intracellular signal transduction; P:Golgi localization; P:mitochondrion localization; P:peroxisome localization; F:phosphatidylinositol phospholipase C activity; F:obsolete signal transducer activity; F:calcium ion binding; C:p…	Phosphoinositide phospholipase C	P:GO:0035556; F:GO:0004435; F:GO:0005509	P:intracellular signal transduction; F:phosphatidylinositol phospholipase C activity; F:calcium ion binding	568	51.286	1698	382	9.78	2.2	2.15233	0.957	8.007	-2.458	-8.376	DE - Mature
GZUJ98X01_(single)_trimmed_contig_33512	inositol-tetrakisphosphate 1-kinase 1-like	695	4.96e-19	P:myo-inositol hexakisphosphate biosynthetic process; P:inositol trisphosphate metabolic process; P:inositol phosphorylation; F:magnesium ion binding; F:ATP binding; F:inositol tetrakisphosphate 1-kinase activity; F:inositol-1,3,4-trisphosphate 6-kinase activity; F:inositol-1,3,4-trisphosphate 5-kinase activity; C:mitochondrion; C:cytosol	Inositol-tetrakisphosphate 1-kinase; Inositol-1,3,4-trisphosphate 5/6-kinase	no GO terms	no GO terms	297	43.459	749	170	6.82	1.55	2.1375	0.941	5.574	-2.445	-6.087	DE - Mature
GZUJ98X01_(single)_trimmed_contig_33648	ring finger protein	307	3.43e-26	P:obsolete animal organ senescence; F:nucleic acid binding; F:zinc ion binding; C:nucleus		no IPS match	no IPS match	41	13.463	195	31	4.02	0.64	2.65105	0.923	3.506	-2.959	-4.588	DE - Mature
GZUJ98X01_(single)_trimmed_contig_33969	ycf1 partial	2340	5.6e-145	C:integral component of membrane; C:chloroplast membrane		no GO terms	no GO terms	913	49.612	1975	581	5.34	1.57	1.76608	0.925	4.075	-2.071	-4.571	DE - Mature
GZUJ98X01_(single)_trimmed_contig_33972	plasma membrane h atpase	2860	0	P:obsolete ATP catabolic process; P:ATP biosynthetic process; P:sister chromatid cohesion; P:homologous chromosome pairing at meiosis; P:reciprocal meiotic recombination; P:response to salt stress; P:xylem development; P:regulation of chromosome organization; P:meiotic DNA double-strand break formation; P:cell wall macromolecule metabolic process; P:meiotic chromosome segregation; P:proton transm…	Acting on acid anhydrides	P:GO:0006200; P:GO:0006754; P:GO:0006812; F:GO:0000166; F:GO:0016887; F:GO:0019829; F:GO:0046872; C:GO:0016021	P:obsolete ATP catabolic process; P:ATP biosynthetic process; P:cation transport; F:nucleotide binding; F:ATP hydrolysis activity; F:ATPase-coupled cation transmembrane transporter activity; F:metal ion binding; C:integral component of membrane	1444	62.697	3206	601	7.1	1.33	2.41639	0.966	6.025	-2.721	-6.611	DE - Mature
GZUJ98X01_(single)_trimmed_contig_34121	ubiquitin-conjugating enzyme e2	780	8.32e-72	P:ubiquitin-dependent protein catabolic process; P:protein ubiquitination; F:ubiquitin-protein transferase activity; F:ATP binding; C:nucleus; C:cytoplasm; C:plasma membrane	Forming carbon-nitrogen bonds	F:GO:0016881	F:acid-amino acid ligase activity	690	91.764	1755	104	14.24	0.84	4.08342	0.994	13.571	-4.383	-14.261	DE - Mature
GZUJ98X01_(single)_trimmed_contig_34288	probable leucine-rich repeat receptor-like protein kinase at4g00330-like	367	1.27e-40	P:protein phosphorylation; P:anion transport; P:systemic acquired resistance; P:salicylic acid biosynthetic process; P:transmembrane transport; P:organic substance transport; F:calmodulin-dependent protein kinase activity; F:calmodulin binding; F:ATP binding; F:ion transmembrane transporter activity; F:carbohydrate transmembrane transporter activity; F:secondary active transmembrane transporter a…	Calcium/calmodulin-dependent protein kinase	P:GO:0006468; F:GO:0004672; F:GO:0005524; F:GO:0016772	P:protein phosphorylation; F:protein kinase activity; F:ATP binding; F:transferase activity, transferring phosphorus-containing groups	111	31.422	298	8	5.14	0.14	5.19827	0.966	5.032	-5.525	-7.473	DE - Mature
GZUJ98X01_(single)_trimmed_contig_34524	late embryogenis abundant protein 5	682	9.47e-20	P:MAPK cascade; P:response to reactive oxygen species; P:protein targeting to membrane; P:response to cold; P:response to wounding; P:abscisic acid-activated signaling pathway; P:systemic acquired resistance, salicylic acid mediated signaling pathway; P:jasmonic acid mediated signaling pathway; P:regulation of plant-type hypersensitive response; P:cellular response to phosphate starvation; P:gala…		no IPS match	no IPS match	142	20.95	548	76	5.09	0.71	2.84177	0.95	4.519	-3.156	-5.512	DE - Mature
GZUJ98X01_(single)_trimmed_contig_34808	wall-associated receptor kinase-like 8-like	325	1.35e-29	P:obsolete activation of MAPKK activity; F:MAP kinase kinase kinase activity; F:calcium ion binding; F:ATP binding; F:polysaccharide binding; C:integral component of membrane	Mitogen-activated protein kinase kinase kinase; Transferring phosphorus-containing groups	P:GO:0006468; F:GO:0004672; F:GO:0005524; F:GO:0016772	P:protein phosphorylation; F:protein kinase activity; F:ATP binding; F:transferase activity, transferring phosphorus-containing groups	287	87.751	682	152	13.28	2.96	2.16559	0.962	10.897	-2.472	-11.174	DE - Mature
GZUJ98X01_(single)_trimmed_contig_34816	cytochrome c oxidoreductase	497	2.88e-24	P:water transport; P:response to salt stress; P:response to fructose; P:fructose export from vacuole to cytoplasm; F:sugar transmembrane transporter activity; C:integral component of plasma membrane; C:plant-type vacuole membrane		C:GO:0016021	C:integral component of membrane	366	76.099	1348	325	17.17	4.14	2.05219	0.966	13.831	-2.358	-14.031	DE - Mature
GZUJ98X01_(single)_trimmed_contig_34910	e3 sumo-protein ligase siz1-like	239	5.28e-18	P:response to stress; P:response to abiotic stimulus; P:cellular process; P:regulation of response to stimulus; P:regulation of cellular process; F:binding		no IPS match	no IPS match	130	53.565	307	76	8.13	2.01	2.01606	0.948	6.508	-2.32	-6.909	DE - Mature
GZUJ98X01_(single)_trimmed_contig_34991	nitrate transporter -like	1993	0	P:oligopeptide transport; P:response to nematode; P:regulation of stomatal movement; P:abscisic acid transport; F:calcium ion binding; F:abscisic acid transmembrane transporter activity; C:plasma membrane		P:GO:0006810; F:GO:0005215; C:GO:0016020	P:transport; F:transporter activity; C:membrane	553	29.118	1332	286	4.23	0.91	2.21672	0.908	3.499	-2.525	-4.315	DE - Mature
GZUJ98X01_(single)_trimmed_contig_35063	retrotransposon ty3-gypsy subclass	1529	7.73e-48	F:nucleic acid binding; F:zinc ion binding		F:GO:0003676; F:GO:0008270	F:nucleic acid binding; F:zinc ion binding	486	32.619	1482	426	6.14	1.76	1.80266	0.925	4.713	-2.105	-5.161	DE - Mature
GZUJ98X01_(single)_trimmed_contig_35625	auxin-induced protein 5ng4-like	1618	3.96e-104	C:extracellular region; C:membrane		C:GO:0016020	C:membrane	1040	66.338	2496	323	9.77	1.26	2.95493	0.982	8.75	-3.256	-9.336	DE - Mature
GZUJ98X01_(single)_trimmed_contig_35662	unnamed protein product	289	1.84e-18	P:regulation of RNA biosynthetic process		no IPS match	no IPS match	142	48.82	278	75	6.09	1.64	1.89275	0.925	4.764	-2.196	-5.246	DE - Mature
GZUJ98X01_(single)_trimmed_contig_3636	mitogen-activated protein kinase kinase kinase 1-like	764	1.74e-18	P:obsolete activation of MAPKK activity; P:response to cold; P:response to wounding; P:response to salt stress; P:response to cadmium ion; F:DNA binding; F:MAP kinase kinase kinase activity; F:ATP binding; F:kinase binding; C:nucleus; C:plastid	Mitogen-activated protein kinase kinase kinase; Transferring phosphorus-containing groups	no IPS match	no IPS match	270	41.831	495	135	4.1	1.12	1.87213	0.908	3.199	-2.18	-3.871	DE - Mature
GZUJ98X01_(single)_trimmed_contig_36445	protein	1361	1.04e-108	P:autophagy; F:glycosyltransferase activity; C:extracellular region; C:cytosol		no GO terms	no GO terms	377	29.247	894	252	4.16	1.17	1.83007	0.908	3.212	-2.133	-3.856	DE - Mature
GZUJ98X01_(single)_trimmed_contig_36582	retrotransposon ty1-copia subclass	2172	2.39e-15	P:DNA integration; F:nucleic acid binding; F:exonuclease activity; F:zinc ion binding; C:intracellular anatomical structure		no GO terms	no GO terms	574	26.551	1447	227	4.22	0.66	2.67671	0.923	3.685	-2.978	-4.738	DE - Mature
GZUJ98X01_(single)_trimmed_contig_36867	u-box domain-containing protein 33-like	754	1.71e-57	P:protein phosphorylation; P:response to stress; P:protein ubiquitination; F:protein serine/threonine kinase activity; F:ubiquitin-protein transferase activity; F:ATP binding; C:ubiquitin ligase complex	Transferring phosphorus-containing groups; Forming carbon-nitrogen bonds	no IPS match	no IPS match	292	40.462	606	185	5.09	1.55	1.7154	0.908	3.834	-2.018	-4.333	DE - Mature
GZUJ98X01_(single)_trimmed_contig_37066	glutamyl-trna amidotransferase subunit a	713	1.74e-60	P:phosphatidylglycerol biosynthetic process; P:mitochondrial translation; P:glutaminyl-tRNAGln biosynthesis via transamidation; F:ATP binding; F:transferase activity; F:hydrolase activity; F:glutaminyl-tRNA synthase (glutamine-hydrolyzing) activity; C:mitochondrion; C:chloroplast stroma; C:glutamyl-tRNA(Gln) amidotransferase complex	Glutaminyl-tRNA synthase (glutamine-hydrolyzing)	F:GO:0016884	F:carbon-nitrogen ligase activity, with glutamine as amido-N-donor	121	19.52	435	48	3.86	0.43	3.16619	0.928	3.52	-3.486	-4.954	DE - Mature
GZUJ98X01_(single)_trimmed_contig_37177	udp-glycosyltransferase 82a1-like	1538	3.42e-131	F:UDP-glycosyltransferase activity; F:hexosyltransferase activity		no IPS match	no IPS match	391	27.603	1112	261	4.58	1.07	2.09774	0.908	3.711	-2.397	-4.418	DE - Mature
GZUJ98X01_(single)_trimmed_contig_37245	n-hydroxycinnamoyl benzoyltransferase	1297	1.59e-49	F:transferase activity		no IPS match	no IPS match	446	34.958	1058	304	5.16	1.48	1.80177	0.908	3.967	-2.105	-4.491	DE - Mature
GZUJ98X01_(single)_trimmed_contig_37503	catalase	332	6.76e-70	P:hydrogen peroxide catabolic process; P:obsolete oxidation-reduction process; F:catalase activity; F:heme binding; F:metal ion binding	Catalase	P:GO:0006979; P:GO:0055114; F:GO:0004096; F:GO:0020037	P:response to oxidative stress; P:obsolete oxidation-reduction process; F:catalase activity; F:heme binding	328	100.527	918	284	17.5	5.42	1.69099	0.96	13.133	-1.999	-13.284	DE - Mature
GZUJ98X01_(single)_trimmed_contig_37540	single-stranded dna-binding protein	359	3.58e-34	P:DNA replication; F:single-stranded DNA binding; C:mitochondrion		F:GO:0003697	F:single-stranded DNA binding	191	53.415	570	105	10.05	1.85	2.4416	0.975	8.56	-2.747	-8.99	DE - Mature
GZUJ98X01_(single)_trimmed_contig_37582	cc-nbs-lrr resistance protein	580	3.01e-19	P:defense response; F:nucleotide binding; F:phosphoprotein phosphatase activity; F:ATP binding; F:hydrolase activity; F:ribonucleoside triphosphate phosphatase activity; F:ADP binding		no GO terms	no GO terms	170	29.952	420	57	4.58	0.62	2.88501	0.95	4.084	-3.187	-5.18	DE - Mature
GZUJ98X01_(single)_trimmed_contig_37583	peroxidase 4	233	1.87e-17	P:response to oxidative stress; P:obsolete oxidation-reduction process; F:peroxidase activity; F:heme binding	Peroxidase	P:GO:0006979; P:GO:0055114; F:GO:0004601; F:GO:0020037	P:response to oxidative stress; P:obsolete oxidation-reduction process; F:peroxidase activity; F:heme binding	99	46.584	190	8	5.16	0.22	4.5518	0.952	4.99	-4.876	-6.977	DE - Mature
GZUJ98X01_(single)_trimmed_contig_3801	sucrose phosphate synthase	1797	1.83e-12	P:sucrose biosynthetic process; F:sucrose-phosphate synthase activity; C:cytosol; C:plasma membrane; C:plasmodesma	Sucrose-phosphate synthase	no GO terms	no GO terms	1116	62.789	5275	1576	18.58	5.55	1.74319	0.961	14.102	-2.049	-14.25	DE - Mature
GZUJ98X01_(single)_trimmed_contig_3810	guanine nucleotide-binding protein subunit beta-like protein	553	2.99e-35	P:embryo development; P:acquisition of desiccation tolerance in seed		no IPS match	no IPS match	349	64.557	861	194	9.86	2.22	2.15103	0.957	8.066	-2.456	-8.431	DE - Mature
GZUJ98X01_(single)_trimmed_contig_38374	phytoene synthase	630	2.73e-28	P:biosynthetic process; F:transferase activity, transferring alkyl or aryl (other than methyl) groups		P:GO:0009058; F:GO:0016740	P:biosynthetic process; F:transferase activity	166	26.927	434	76	4.36	0.76	2.52026	0.923	3.746	-2.82	-4.689	DE - Mature
GZUJ98X01_(single)_trimmed_contig_38773	arf gtpase	481	4.68e-51	F:protein binding		F:GO:0005515	F:protein binding	185	38.944	383	93	5.04	1.22	2.04654	0.929	4.054	-2.348	-4.684	DE - Mature
GZUJ98X01_(single)_trimmed_contig_39164	nucleolar complex protein 2 homolog	371	2.17e-35	P:pyrimidine ribonucleotide biosynthetic process; P:obsolete transcription factor import into nucleus; F:binding; F:oxidoreductase activity; C:cytosol		no GO terms	no GO terms	147	41.698	293	78	5	1.33	1.9105	0.908	3.926	-2.215	-4.508	DE - Mature
GZUJ98X01_(single)_trimmed_contig_39505	uncharacterized ribonuclease sll1290-like	269	3.21e-27	P:rRNA processing; P:tRNA metabolic process; P:embryo development ending in seed dormancy; P:chloroplast relocation; P:thylakoid membrane organization; F:3'-5'-exoribonuclease activity; F:RNA binding; F:exoribonuclease II activity; C:mitochondrion; C:chloroplast	Acting on ester bonds; Exoribonuclease II	no GO terms	no GO terms	100	35.874	241	65	5.67	1.53	1.88982	0.925	4.437	-2.196	-4.951	DE - Mature
GZUJ98X01_(single)_trimmed_contig_3964	octicosapeptide phox bem1p domain-containing protein	1574	2.37e-21	P:biological_process; F:molecular_function; F:protein binding; C:nucleus		no IPS match	no IPS match	1251	82.229	4539	624	18.26	2.51	2.86293	0.993	16.237	-3.169	-16.543	DE - Mature
GZUJ98X01_(single)_trimmed_contig_40463	protein	323	1.59e-24	P:biological_process; F:molecular_function		no GO terms	no GO terms	128	40.238	339	38	6.64	0.74	3.16559	0.974	6.046	-3.463	-6.968	DE - Mature
GZUJ98X01_(single)_trimmed_contig_40810	ap2 domain-containing transcription factor	678	1.04e-31	P:protein targeting to membrane; P:response to brassinosteroid; P:negative regulation of flower development; P:positive regulation of flavonoid biosynthetic process; P:regulation of plant-type hypersensitive response; P:negative regulation of DNA-templated transcription; P:leaf development; P:lateral root development; F:DNA binding; F:DNA-binding transcription factor activity; C:nucleus		P:GO:0006355; F:GO:0003677; F:GO:0003700	P:regulation of DNA-templated transcription; F:DNA binding; F:DNA-binding transcription factor activity	89	13.621	470	89	4.39	0.83	2.40304	0.923	3.719	-2.707	-4.6	DE - Mature
GZUJ98X01_(single)_trimmed_contig_41103	oxoprolinase family protein	629	6.74e-79	P:glutathione catabolic process; F:5-oxoprolinase (ATP-hydrolyzing) activity; C:cytosol; C:plasmodesma	5-oxoprolinase (ATP-hydrolyzing)	no GO terms	no GO terms	231	40.568	568	98	5.72	0.99	2.53051	0.945	4.922	-2.841	-5.683	DE - Mature
GZUJ98X01_(single)_trimmed_contig_41217	strictosidine synthase family protein	239	3.82e-42	P:alkaloid biosynthetic process; F:strictosidine synthase activity; C:extracellular region; C:vacuolar membrane; C:endoplasmic reticulum; C:plasma membrane; C:chloroplast	Strictosidine synthase	no GO terms	no GO terms	64	25.464	158	36	4.19	0.95	2.14095	0.908	3.416	-2.44	-4.198	DE - Mature
GZUJ98X01_(single)_trimmed_contig_41743	thaumatin-like protein	310	2.3e-23	P:xylan metabolic process		no GO terms	no GO terms	69	23.529	194	58	3.96	1.18	1.74671	0.908	3.006	-2.048	-3.637	DE - Mature
GZUJ98X01_(single)_trimmed_contig_41903	ring-h2 finger protein atl48-like	416	3.4e-12	F:protein binding; F:zinc ion binding		F:GO:0005515; F:GO:0008270	F:protein binding; F:zinc ion binding	179	42.505	657	198	10	3.01	1.73216	0.949	7.566	-2.036	-7.835	DE - Mature
GZUJ98X01_(single)_trimmed_contig_4191	arogenate dehydrogenase	1765	3.5e-109	P:threonine catabolic process; P:tyrosine biosynthetic process; P:obsolete oxidation-reduction process; F:nucleotide binding; F:prephenate dehydrogenase (NADP+) activity; F:prephenate dehydrogenase (NAD+) activity; C:mitochondrion; C:chloroplast	Prephenate dehydrogenase; Prephenate dehydrogenase (NADP(+))	P:GO:0006571; P:GO:0055114; F:GO:0004665; F:GO:0008977	P:tyrosine biosynthetic process; P:obsolete oxidation-reduction process; F:prephenate dehydrogenase (NADP+) activity; F:prephenate dehydrogenase (NAD+) activity	1125	67.101	3151	904	11.3	3.24	1.80226	0.952	8.685	-2.107	-8.937	DE - Mature
GZUJ98X01_(single)_trimmed_contig_42004	retroelement pol polyprotein	496	1.65e-67	F:nucleic acid binding		F:GO:0003676	F:nucleic acid binding	79	16.032	361	29	4.61	0.37	3.63917	0.95	4.311	-3.944	-5.843	DE - Mature
GZUJ98X01_(single)_trimmed_contig_4225	beta-amylase	1089	7.48e-105	P:polysaccharide catabolic process; F:beta-amylase activity; F:cation binding; C:chloroplast	Beta-amylase	P:GO:0000272; P:GO:0005975; F:GO:0016161	P:polysaccharide catabolic process; P:carbohydrate metabolic process; F:beta-amylase activity	649	64.027	1833	69	10.66	0.4	4.73606	0.991	10.339	-5.037	-11.5	DE - Mature
GZUJ98X01_(single)_trimmed_contig_42348	nac domain-containing	664	1e-96	P:regulation of DNA-templated transcription; P:response to bacterium; P:multidimensional cell growth; P:flower development; P:leaf senescence; P:innate immune response; F:DNA binding; F:DNA-binding transcription factor activity; C:nucleus		P:GO:0006355; F:GO:0003677	P:regulation of DNA-templated transcription; F:DNA binding	417	62.44	1185	133	11.3	1.27	3.15342	0.989	10.279	-3.461	-10.847	DE - Mature
GZUJ98X01_(single)_trimmed_contig_43027	peroxidase 4	1189	9.18e-118	P:response to oxidative stress; P:obsolete oxidation-reduction process; F:peroxidase activity; F:heme binding; F:metal ion binding	Peroxidase	no GO terms	no GO terms	399	34.443	1297	33	6.91	0.18	5.26262	0.976	6.768	-5.602	-8.786	DE - Mature
GZUJ98X01_(single)_trimmed_contig_43088	dof zinc finger	323	2.72e-38	P:regulation of DNA-templated transcription; F:DNA binding		no IPS match	no IPS match	194	60.483	590	138	11.56	2.7	2.09811	0.96	9.382	-2.402	-9.685	DE - Mature
GZUJ98X01_(single)_trimmed_contig_43239	unnamed protein product	360	5.88e-53	P:protein folding; P:response to heat; P:response to salt stress; P:regulation of ATP-dependent activity; F:ATP binding; F:heat shock protein binding; F:metal ion binding; F:unfolded protein binding; C:cell wall; C:nucleolus; C:plasma membrane		P:GO:0006457; F:GO:0051082	P:protein folding; F:unfolded protein binding	50	13.761	237	68	4.17	1.2	1.79701	0.908	3.203	-2.107	-3.834	DE - Mature
GZUJ98X01_(single)_trimmed_contig_43626	glycine-rich protein	485	7.73e-17	P:protein glycosylation; C:extracellular region; C:vacuole; C:plasmodesma; C:chloroplast		no IPS match	no IPS match	190	39.177	367	91	4.79	1.19	2.00906	0.908	3.832	-2.318	-4.479	DE - Mature
GZUJ98X01_(single)_trimmed_contig_43741	retrotransposon unclassified	551	3.65e-32	P:DNA recombination; F:DNA binding; F:catalytic activity; F:metal ion binding; C:plastid		no GO terms	no GO terms	111	19.822	330	30	3.79	0.34	3.47859	0.928	3.515	-3.765	-5.151	DE - Mature
GZUJ98X01_(single)_trimmed_contig_43821	cytochrome p450 78a3-like	349	9.01e-50	P:obsolete oxidation-reduction process; F:iron ion binding; F:electron transfer activity; F:oxygen binding; F:heme binding; F:flavonoid 3',5'-hydroxylase activity; C:chloroplast	Acting on paired donors, with incorporation or reduction of molecular oxygen. The oxygen incorporated need not be derived from O(2)	P:GO:0055114; F:GO:0005506; F:GO:0016705; F:GO:0020037	P:obsolete oxidation-reduction process; F:iron ion binding; F:oxidoreductase activity, acting on paired donors, with incorporation or reduction of molecular oxygen; F:heme binding	79	22.292	246	25	4.46	0.45	3.30905	0.95	4.098	-3.605	-5.458	DE - Mature
GZUJ98X01_(single)_trimmed_contig_43836	boron transporter	289	1.04e-37	P:iron ion transport; P:response to boron-containing substance; P:cellular response to iron ion starvation; P:response to nitrate; P:nitrate transmembrane transport; P:borate transmembrane transport; F:solute:inorganic anion antiporter activity; F:borate efflux transmembrane transporter activity; C:endosome; C:vacuole; C:integral component of membrane; C:lateral plasma membrane; C:columella		P:GO:0006820; F:GO:0005452; C:GO:0016020	P:anion transport; F:solute:inorganic anion antiporter activity; C:membrane	98	34.907	224	49	4.91	1.07	2.19811	0.929	4.041	-2.499	-4.751	DE - Mature
GZUJ98X01_(single)_trimmed_contig_44548	osmotin-like protein	873	6.27e-69	P:response to stress		no GO terms	no GO terms	197	24.387	916	133	6.64	0.96	2.79008	0.964	5.866	-3.09	-6.63	DE - Mature
GZUJ98X01_(single)_trimmed_contig_44589	transportin-3-like isoform 2	305	3.28e-36	P:protein import into nucleus; P:regulation of RNA splicing; F:obsolete protein transporter activity; F:small GTPase binding; C:nuclear pore		F:GO:0005488	F:binding	161	53.036	316	93	6.56	1.93	1.76509	0.936	5.001	-2.071	-5.413	DE - Mature
GZUJ98X01_(single)_trimmed_contig_4466	ac091774_5 senescence-associated protein	204	1.22e-14	P:response to cold; P:response to water deprivation; P:response to high light intensity; P:response to salt stress; C:cytoplasm; C:plasma membrane		no GO terms	no GO terms	39	17.877	122	5	3.79	0.16	4.56605	0.928	3.663	-4.915	-6.13	DE - Mature
GZUJ98X01_(single)_trimmed_contig_4479	cell division protein isolog	241	1.39e-18	P:chloroplast fission; F:metallopeptidase activity; F:ATP hydrolysis activity; C:chloroplast envelope	Deleted entry	no IPS match	no IPS match	48	18.394	164	28	4.31	0.74	2.54209	0.923	3.716	-2.856	-4.687	DE - Mature
GZUJ98X01_(single)_trimmed_contig_4512	probable peptide nitrate transporter at1g59740-like	630	1.75e-51	P:oligopeptide transport; P:response to nematode; P:xylem development; P:cell wall macromolecule metabolic process; F:transporter activity; C:plasma membrane; C:integral component of membrane		P:GO:0006810; F:GO:0005215; C:GO:0016020	P:transport; F:transporter activity; C:membrane	614	99.002	1528	294	15.35	2.95	2.37945	0.983	12.974	-2.684	-13.248	DE - Mature
GZUJ98X01_(single)_trimmed_contig_45236	g-type lectin s-receptor-like serine threonine-protein kinase at1g11330-like	766	1.58e-12	P:protein autophosphorylation; F:protein serine/threonine kinase activity; F:ATP binding; C:plasma membrane	Transferring phosphorus-containing groups	no IPS match	no IPS match	179	23.482	506	95	4.18	0.79	2.40358	0.923	3.549	-2.719	-4.471	DE - Mature
GZUJ98X01_(single)_trimmed_contig_45364	40s ribosomal protein s28	441	2.63e-25	P:rRNA export from nucleus; P:translation; F:structural constituent of ribosome; C:cell wall; C:plasma membrane; C:cytosolic small ribosomal subunit		no IPS match	no IPS match	115	26.687	294	54	4.22	0.78	2.4357	0.923	3.596	-2.751	-4.527	DE - Mature
GZUJ98X01_(single)_trimmed_contig_45937	calmodulin	753	1.85e-101	P:detection of calcium ion; P:acetyl-CoA metabolic process; P:response to mechanical stimulus; P:pollen germination; P:regulation of photomorphogenesis; P:calcium-mediated signaling; P:protein catabolic process; P:Golgi vesicle transport; P:obsolete oxidation-reduction process; P:membrane fusion; F:calcium ion binding; F:protein binding; F:2-alkenal reductase [NAD(P)+] activity; C:nucleus; C:vacu…	2-alkenal reductase (NAD(P)(+))	F:GO:0005509	F:calcium ion binding	250	34.425	561	167	4.72	1.4	1.75336	0.908	3.583	-2.054	-4.13	DE - Mature
GZUJ98X01_(single)_trimmed_contig_459	af244921_1 peroxidase prx12 precursor	307	2.69e-14	P:response to oxidative stress; P:obsolete oxidation-reduction process; F:peroxidase activity; F:heme binding; F:metal ion binding	Peroxidase	no GO terms	no GO terms	90	30.967	317	16	6.54	0.33	4.30875	0.975	6.274	-4.614	-7.788	DE - Mature
GZUJ98X01_(single)_trimmed_contig_460	af244921_1 peroxidase prx12 precursor	744	5.57e-107	P:hydrogen peroxide catabolic process; P:obsolete oxidation-reduction process; F:peroxidase activity; F:heme binding; F:metal ion binding; C:extracellular region; C:cytoplasmic vesicle	Peroxidase	P:GO:0006979; P:GO:0055114; F:GO:0004601; F:GO:0020037	P:response to oxidative stress; P:obsolete oxidation-reduction process; F:peroxidase activity; F:heme binding	540	73.409	1384	223	11.78	1.9	2.63227	0.981	10.249	-2.94	-10.662	DE - Mature
GZUJ98X01_(single)_trimmed_contig_46170	reverse transcriptase	225	1.81e-27	P:DNA integration; F:nucleic acid binding; F:zinc ion binding		no GO terms	no GO terms	64	27.053	132	28	3.71	0.79	2.23149	0.908	3.079	-2.543	-3.993	DE - Mature
GZUJ98X01_(single)_trimmed_contig_46277	rna-directed dna polymerase reverse transcriptase-related family protein	462	2.22e-25	C:intracellular membrane-bounded organelle; C:obsolete cytoplasmic part		no GO terms	no GO terms	109	23.578	292	27	4	0.37	3.4344	0.928	3.705	-3.741	-5.265	DE - Mature
GZUJ98X01_(single)_trimmed_contig_46693	cellulose synthase-like protein g3	244	3.44e-25	P:cellulose biosynthetic process; F:cellulose synthase (UDP-forming) activity; C:membrane	Cellulose synthase (UDP-forming)	P:GO:0030244; F:GO:0016760; C:GO:0016020	P:cellulose biosynthetic process; F:cellulose synthase (UDP-forming) activity; C:membrane	62	25.631	189	9	4.9	0.23	4.41308	0.952	4.718	-4.698	-6.658	DE - Mature
GZUJ98X01_(single)_trimmed_contig_46784	ethylene responsive element binding factor 2	574	1.92e-22	P:respiratory burst involved in defense response; P:ethylene biosynthetic process; P:response to abscisic acid; P:induced systemic resistance, jasmonic acid mediated signaling pathway; P:ethylene-activated signaling pathway; P:response to chitin; P:intracellular signal transduction; P:positive regulation of DNA-templated transcription; F:DNA binding; F:DNA-binding transcription factor activity; C…		P:GO:0006355; F:GO:0003677; F:GO:0003700	P:regulation of DNA-templated transcription; F:DNA binding; F:DNA-binding transcription factor activity	107	19.176	718	201	7.92	2.22	1.83494	0.944	6.13	-2.143	-6.494	DE - Mature
GZUJ98X01_(single)_trimmed_contig_4700	protein	1272	1.55e-118	P:aerobic respiration; P:NAD biosynthetic process; P:iron-sulfur cluster assembly; P:quinolinate biosynthetic process; P:positive regulation of sulfur metabolic process; P:positive regulation of transferase activity; F:enzyme activator activity; F:quinolinate synthetase A activity; F:protein homodimerization activity; F:4 iron, 4 sulfur cluster binding; C:chloroplast		P:GO:0009435; F:GO:0008987	P:NAD biosynthetic process; F:quinolinate synthetase A activity	1456	120.765	3558	859	17.71	4.28	2.04888	0.966	14.26	-2.356	-14.453	DE - Mature
GZUJ98X01_(single)_trimmed_contig_47263	non-specific lipid transfer protein	698	1.07e-60	P:lipid transport; F:lipid binding		no IPS match	no IPS match	336	51.777	819	123	7.43	1.12	2.72986	0.972	6.53	-3.041	-7.204	DE - Mature
GZUJ98X01_(single)_trimmed_contig_47269	inositol phosphate kinase	654	7.47e-37	P:phosphorylation; P:inositol trisphosphate metabolic process; F:magnesium ion binding; F:ATP binding; F:inositol tetrakisphosphate 1-kinase activity; F:inositol-1,3,4-trisphosphate 6-kinase activity; F:inositol-1,3,4-trisphosphate 5-kinase activity; C:intracellular anatomical structure	Inositol-tetrakisphosphate 1-kinase; Inositol-1,3,4-trisphosphate 5/6-kinase	P:GO:0032957; F:GO:0000287; F:GO:0005524; F:GO:0047325; F:GO:0052725; F:GO:0052726; C:GO:0005622	P:inositol trisphosphate metabolic process; F:magnesium ion binding; F:ATP binding; F:inositol tetrakisphosphate 1-kinase activity; F:inositol-1,3,4-trisphosphate 6-kinase activity; F:inositol-1,3,4-trisphosphate 5-kinase activity; C:intracellular anatomical structure	446	69.638	894	244	8.65	2.36	1.87391	0.944	6.748	-2.179	-7.091	DE - Mature
GZUJ98X01_(single)_trimmed_contig_4735	retroelement pol poly	4389	0	P:protein phosphorylation; P:DNA integration; P:obsolete oxidation-reduction process; F:nucleic acid binding; F:protein kinase activity; F:ATP binding; F:zinc ion binding; F:oxidoreductase activity; F:transferase activity, transferring phosphorus-containing groups; C:cellular_component		no IPS match	no IPS match	2377	55.224	5126	162	7.39	0.23	5.00587	0.982	7.21	-5.29	-8.942	DE - Mature
GZUJ98X01_(single)_trimmed_contig_4757	apospory-associated protein c	1414	1.07e-14	P:galactose metabolic process; P:response to abscisic acid; P:glucosinolate biosynthetic process; F:aldose 1-epimerase activity; F:carbohydrate binding; C:nucleus; C:cytosol; C:plasma membrane; C:plant-type cell wall	Aldose 1-epimerase	no GO terms	no GO terms	937	68.618	2386	297	10.68	1.33	3.00541	0.985	9.614	-3.312	-10.168	DE - Mature
GZUJ98X01_(single)_trimmed_contig_4834	hypothetical protein mapping: ARALYDRAFT_918030	230	2.09e-30	P:aerobic respiration; P:NAD biosynthetic process; P:iron-sulfur cluster assembly; P:quinolinate biosynthetic process; P:positive regulation of sulfur metabolic process; P:positive regulation of transferase activity; F:enzyme activator activity; F:quinolinate synthetase A activity; F:protein homodimerization activity; F:4 iron, 4 sulfur cluster binding; C:chloroplast		no IPS match	no IPS match	163	69.526	498	109	13.71	3	2.19219	0.964	11.288	-2.498	-11.561	DE - Mature
GZUJ98X01_(single)_trimmed_contig_48649	predicted protein	507	7.12e-47	P:maltose metabolic process; P:systemic acquired resistance; P:gibberellic acid mediated signaling pathway; P:seed dormancy process; P:starch biosynthetic process; P:regulation of defense response; P:positive regulation of catalytic activity; C:nucleus; C:mitochondrion; C:chloroplast		no GO terms	no GO terms	452	93.132	1382	206	17.26	2.57	2.74759	0.992	15.186	-3.052	-15.49	DE - Mature
GZUJ98X01_(single)_trimmed_contig_49116	acidic endochitinase	1143	5.39e-136	P:polysaccharide catabolic process; P:chitin catabolic process; F:lysozyme activity; F:chitinase activity; C:extracellular space	Chitinase; Lysozyme	P:GO:0005975; F:GO:0004553	P:carbohydrate metabolic process; F:hydrolase activity, hydrolyzing O-glycosyl compounds	433	39.497	1097	177	6.08	0.98	2.63322	0.958	5.287	-2.938	-6.048	DE - Mature
GZUJ98X01_(single)_trimmed_contig_50599	protein	272	3.01e-47	P:response to superoxide; P:protein phosphorylation; P:fatty acid beta-oxidation; P:lipid transport; P:intra-Golgi vesicle-mediated transport; P:cell death; P:pollen development; P:gravitropism; P:pollen germination; P:salicylic acid mediated signaling pathway; P:ethylene-activated signaling pathway; P:lithium ion transport; P:protein import into peroxisome matrix; P:cellular macromolecule catabo…	Transferring phosphorus-containing groups	F:GO:0005488	F:binding	45	16.449	135	1	3.14	0.02	7.29462	0.923	3.125	-7.383	-8.017	DE - Mature
GZUJ98X01_(single)_trimmed_contig_51373	2-oxoglutarate and fe -dependent oxygenase-like protein	255	1.28e-41	P:obsolete oxidation-reduction process; F:2-oxoglutarate-dependent dioxygenase activity; C:nucleus; C:mitochondrion; C:plasmodesma	Acting on paired donors, with incorporation or reduction of molecular oxygen. The oxygen incorporated need not be derived from O(2)	no GO terms	no GO terms	97	37.922	313	83	7.77	2.06	1.91527	0.944	6.108	-2.221	-6.499	DE - Mature
GZUJ98X01_(single)_trimmed_contig_51605	glutaredoxin	302	6.59e-32	P:cell redox homeostasis; P:anther development; F:electron transfer activity; F:protein-disulfide reductase activity; C:cytoplasm		P:GO:0045454; F:GO:0009055; F:GO:0015035	P:cell redox homeostasis; F:electron transfer activity; F:protein-disulfide reductase activity	53	17.924	173	19	3.63	0.4	3.1819	0.923	3.307	-3.493	-4.81	DE - Mature
GZUJ98X01_(single)_trimmed_contig_5164	at5g21222-like protein	277	7.07e-23	P:protein phosphorylation; F:protein serine/threonine kinase activity; F:ATP binding; C:mitochondrion	Transferring phosphorus-containing groups	no GO terms	no GO terms	361	128.061	798	11	18.24	0.25	6.18903	0.997	18.047	-6.487	-19.178	DE - Mature
GZUJ98X01_(single)_trimmed_contig_51651	cytochrome p450	205	5.88e-16	P:obsolete oxidation-reduction process; F:monooxygenase activity; F:iron ion binding; F:electron transfer activity; F:oxidoreductase activity, acting on paired donors, with incorporation or reduction of molecular oxygen; F:heme binding		P:GO:0055114; F:GO:0005506; F:GO:0016705; F:GO:0020037	P:obsolete oxidation-reduction process; F:iron ion binding; F:oxidoreductase activity, acting on paired donors, with incorporation or reduction of molecular oxygen; F:heme binding	49	23.234	352	75	10.87	2.32	2.22816	0.96	9.003	-2.537	-9.354	DE - Mature
GZUJ98X01_(single)_trimmed_contig_5187	gag-pol polyprotein	10869	4.43e-163	F:metal ion binding		no GO terms	no GO terms	7676	71.209	17279	1892	10.06	1.1	3.19305	0.987	9.179	-3.497	-9.823	DE - Mature
GZUJ98X01_(single)_trimmed_contig_52454	probable nad h-dependent oxidoreductase 1-like	340	6.81e-30	P:iron ion transport; P:obsolete oxidation-reduction process; F:6'-deoxychalcone synthase activity; F:codeinone reductase (NADPH) activity; C:cytosol	6'-deoxychalcone synthase; Codeinone reductase (NADPH)	no GO terms	no GO terms	93	27.2	213	33	3.97	0.61	2.70226	0.923	3.471	-2.996	-4.586	DE - Mature
GZUJ98X01_(single)_trimmed_contig_525	cytochrome p450	1226	9.21e-153	P:obsolete oxidation-reduction process; F:monooxygenase activity; F:iron ion binding; F:oxidoreductase activity, acting on paired donors, with incorporation or reduction of molecular oxygen; F:oxygen binding; F:heme binding; C:endoplasmic reticulum		P:GO:0055114; F:GO:0005506; F:GO:0016705; F:GO:0020037	P:obsolete oxidation-reduction process; F:iron ion binding; F:oxidoreductase activity, acting on paired donors, with incorporation or reduction of molecular oxygen; F:heme binding	1633	139.319	3643	830	18.81	4.29	2.13245	0.967	15.355	-2.44	-15.548	DE - Mature
GZUJ98X01_(single)_trimmed_contig_52764	copper-binding family protein	1440	6.84e-29	P:metal ion transport; F:metal ion binding		P:GO:0030001; F:GO:0046872	P:metal ion transport; F:metal ion binding	624	44.25	2954	796	12.99	3.5	1.89197	0.957	10.163	-2.198	-10.398	DE - Mature
GZUJ98X01_(single)_trimmed_contig_52853	ethylene-responsive transcription factor erf098-like	695	2.48e-27	P:regulation of DNA-templated transcription; P:ethylene-activated signaling pathway; P:response to chitin; F:DNA binding; F:DNA-binding transcription factor activity; C:nucleus		P:GO:0006355; F:GO:0003677; F:GO:0003700	P:regulation of DNA-templated transcription; F:DNA binding; F:DNA-binding transcription factor activity	162	24.357	452	31	4.12	0.28	3.87915	0.928	3.892	-4.172	-5.705	DE - Mature
GZUJ98X01_(single)_trimmed_contig_5300	cystinosin homolog	907	1.22e-70	C:vacuolar membrane; C:plasma membrane; C:chloroplast; C:cytoplasmic vesicle		no GO terms	no GO terms	751	85.641	1374	415	9.59	2.9	1.72548	0.949	7.252	-2.033	-7.532	DE - Mature
GZUJ98X01_(single)_trimmed_contig_5350	af385697_1 at5g10580 f12b17_70	1026	4.99e-82	P:iron ion transport; P:cellular response to iron ion starvation; P:response to nitrate; P:nitrate transmembrane transport; C:extracellular region; C:mitochondrion		no GO terms	no GO terms	338	33.737	768	70	4.74	0.43	3.46248	0.95	4.392	-3.762	-5.783	DE - Mature
GZUJ98X01_(single)_trimmed_contig_5357	dehydrin	1030	6.85e-39	P:response to stress; P:response to water		P:GO:0006950; P:GO:0009415	P:response to stress; P:response to water	1376	137.072	3217	903	19.77	5.55	1.83275	0.961	15.294	-2.139	-15.443	DE - Mature
GZUJ98X01_(single)_trimmed_contig_5466	retrotransposon ty1-copia expressed	1696	3.78e-28	F:nucleic acid binding		F:GO:0003676	F:nucleic acid binding	780	47.661	2183	160	8.15	0.6	3.76377	0.982	7.671	-4.076	-8.687	DE - Mature
GZUJ98X01_(single)_trimmed_contig_5485	hexose transporter	293	5.9e-17	P:carbohydrate transmembrane transport; P:obsolete oxidation-reduction process; F:carbohydrate:proton symporter activity; F:2-alkenal reductase [NAD(P)+] activity; C:mitochondrion; C:integral component of membrane	2-alkenal reductase (NAD(P)(+))	P:GO:0055085; F:GO:0022857; C:GO:0016021	P:transmembrane transport; F:transmembrane transporter activity; C:integral component of membrane	119	40.106	306	37	6.61	0.8	3.04658	0.966	5.969	-3.354	-6.847	DE - Mature
GZUJ98X01_(single)_trimmed_contig_5521	transcriptional activator demeter-like	3156	1.83e-117	P:DNA repair; P:DNA methylation; P:regulation of DNA-templated transcription; P:negative regulation of cellular process; F:hydrolase activity; F:lyase activity; F:4 iron, 4 sulfur cluster binding		P:GO:0006281; F:GO:0003824; F:GO:0051539	P:DNA repair; F:catalytic activity; F:4 iron, 4 sulfur cluster binding	1546	49.991	3417	884	6.85	1.77	1.95235	0.936	5.424	-2.257	-5.874	DE - Mature
GZUJ98X01_(single)_trimmed_contig_56605	caffeic acid methyltransferase	623	1.09e-98	P:inositol metabolic process; P:response to stress; P:phenylpropanoid biosynthetic process; P:methylation; F:O-methyltransferase activity; F:inositol 4-methyltransferase activity; F:protein dimerization activity	Inositol 4-methyltransferase; Transferring one-carbon groups	F:GO:0008171; F:GO:0046983	F:O-methyltransferase activity; F:protein dimerization activity	671	111.022	1532	471	15.57	4.79	1.70067	0.958	11.704	-2.008	-11.875	DE - Mature
GZUJ98X01_(single)_trimmed_contig_57251	zinc finger protein 3-like	831	9.49e-56	F:metal ion binding		F:GO:0046872	F:metal ion binding	133	16.878	506	44	3.85	0.34	3.50125	0.928	3.586	-3.829	-5.246	DE - Mature
GZUJ98X01_(single)_trimmed_contig_5733	PREDICTED: uncharacterized protein LOC100785323	1228	5.08e-18	P:tRNA modification; P:queuosine biosynthetic process; F:zinc ion binding; F:queuine tRNA-ribosyltransferase activity		no GO terms	no GO terms	1135	96.109	2227	526	11.48	2.71	2.08276	0.96	9.294	-2.388	-9.596	DE - Mature
GZUJ98X01_(single)_trimmed_contig_5787	beta- -glucanase	1220	3.26e-142	P:carbohydrate metabolic process; P:response to stimulus; F:glucan endo-1,3-beta-D-glucosidase activity	Glucan endo-1,3-beta-D-glucosidase	no IPS match	no IPS match	1019	85.884	2706	186	14.04	0.97	3.85541	0.994	13.27	-4.169	-13.91	DE - Mature
GZUJ98X01_(single)_trimmed_contig_6389	glycoside hydrolase family 28 protein polygalacturonase family protein	416	3.57e-59	P:carbohydrate metabolic process; F:polygalacturonase activity; C:extracellular region; C:vacuolar membrane; C:plasma membrane; C:cytoplasmic vesicle	Endo-polygalacturonase	no GO terms	no GO terms	388	95.733	1178	85	17.93	1.29	3.79693	0.996	16.892	-4.099	-17.382	DE - Mature
GZUJ98X01_(single)_trimmed_contig_642	leucine-rich repeat transmembrane protein	1269	2.26e-101	P:protein phosphorylation; P:transmembrane receptor protein tyrosine kinase signaling pathway; P:embryo sac egg cell differentiation; P:obsolete oxidation-reduction process; F:protein serine/threonine kinase activity; F:ATP binding; F:2-alkenal reductase [NAD(P)+] activity; C:plasma membrane; C:integral component of membrane; C:cytoplasmic vesicle	Transferring phosphorus-containing groups; 2-alkenal reductase (NAD(P)(+))	P:GO:0006468; F:GO:0004672; F:GO:0005524; F:GO:0016772	P:protein phosphorylation; F:protein kinase activity; F:ATP binding; F:transferase activity, transferring phosphorus-containing groups	423	35.708	1243	33	6.2	0.16	5.27612	0.975	6.072	-5.541	-8.22	DE - Mature
GZUJ98X01_(single)_trimmed_contig_64804	glutathione s-	382	1.33e-26	P:response to stress; P:response to abiotic stimulus; P:cellular process; P:response to inorganic substance; F:transferase activity; F:lyase activity; C:chloroplast		no IPS match	no IPS match	130	34.688	289	63	4.79	1.04	2.20344	0.908	3.948	-2.504	-4.675	DE - Mature
GZUJ98X01_(single)_trimmed_contig_6630	laccase-17-like	1797	0	P:response to water deprivation; P:lignin catabolic process; P:obsolete oxidation-reduction process; F:copper ion binding; F:hydroquinone:oxygen oxidoreductase activity; C:apoplast	Laccase	P:GO:0046274; P:GO:0055114; F:GO:0005507; F:GO:0016491; F:GO:0052716; C:GO:0048046	P:lignin catabolic process; P:obsolete oxidation-reduction process; F:copper ion binding; F:oxidoreductase activity; F:hydroquinone:oxygen oxidoreductase activity; C:apoplast	613	35.092	1629	75	5.74	0.26	4.46447	0.967	5.529	-4.747	-7.287	DE - Mature
GZUJ98X01_(single)_trimmed_contig_6640	eukaryotic translation initiation factor 2d-like	1152	2.53e-117	P:translational initiation; F:translation initiation factor activity; F:protein binding		P:GO:0006413; F:GO:0003743; F:GO:0005515	P:translational initiation; F:translation initiation factor activity; F:protein binding	1165	110.017	2507	321	13.78	1.76	2.96893	0.99	12.359	-3.271	-12.784	DE - Mature
GZUJ98X01_(single)_trimmed_contig_6668	gag-pol polyprotein	3113	5.44e-79	P:macromolecule metabolic process; P:primary metabolic process; F:binding		no GO terms	no GO terms	2586	83.368	4985	1169	10.14	2.38	2.09102	0.957	8.22	-2.398	-8.563	DE - Mature
GZUJ98X01_(single)_trimmed_contig_67012	pentatricopeptide repeat-containing protein chloroplastic-like	310	3.38e-25	C:chloroplast		no IPS match	no IPS match	175	61.768	280	80	5.72	1.63	1.81114	0.925	4.4	-2.113	-4.881	DE - Mature
GZUJ98X01_(single)_trimmed_contig_6861	cat eye syndrome critical region protein	1330	5.62e-58	F:copper ion binding; F:zinc ion binding; C:mitochondrion		no GO terms	no GO terms	1106	84.292	3879	438	18.46	2.08	3.14975	0.995	16.789	-3.453	-17.14	DE - Mature
GZUJ98X01_(single)_trimmed_contig_6943	cobra-like protein	1411	0	P:lignin metabolic process; P:cell wall modification involved in abscission; P:plant-type secondary cell wall biogenesis; P:xylem development; P:cellulose microfibril organization; P:glucuronoxylan metabolic process; P:cell growth; P:xylan biosynthetic process; C:vacuolar membrane; C:plasma membrane; C:secondary cell wall; C:anchored component of membrane		P:GO:0010215; P:GO:0016049; C:GO:0031225	P:cellulose microfibril organization; P:cell growth; C:anchored component of membrane	731	52.886	1642	395	7.37	1.77	2.05792	0.941	5.938	-2.361	-6.39	DE - Mature
GZUJ98X01_(single)_trimmed_contig_6967	cat eye syndrome critical region protein	247	4.28e-20	F:copper ion binding; F:zinc ion binding; C:mitochondrion		no GO terms	no GO terms	183	76.223	401	44	10.28	1.13	3.18545	0.987	9.372	-3.494	-10.002	DE - Mature
GZUJ98X01_(single)_trimmed_contig_6968	anion exchanger family protein	2548	0	P:borate transport; P:cellular response to boron-containing substance levels; F:solute:inorganic anion antiporter activity; F:borate efflux transmembrane transporter activity; C:plasma membrane; C:integral component of membrane		P:GO:0006820; F:GO:0005452; C:GO:0016020; C:GO:0016021	P:anion transport; F:solute:inorganic anion antiporter activity; C:membrane; C:integral component of membrane	1141	46.286	2621	171	6.51	0.42	3.9542	0.975	6.173	-4.244	-7.491	DE - Mature
GZUJ98X01_(single)_trimmed_contig_7064	nqr_arath ame: full=nadph:quinone oxidoreductase gi	894	1.23e-62	P:MAPK cascade; P:glycolytic process; P:protein targeting to membrane; P:fatty acid beta-oxidation; P:water transport; P:hyperosmotic response; P:response to oxidative stress; P:Golgi organization; P:response to temperature stimulus; P:response to salt stress; P:salicylic acid biosynthetic process; P:systemic acquired resistance, salicylic acid mediated signaling pathway; P:jasmonic acid mediated…	NAD(P)H dehydrogenase (quinone)	F:GO:0016491	F:oxidoreductase activity	999	111.147	2569	396	18.19	2.8	2.69965	0.992	15.935	-3.004	-16.215	DE - Mature
GZUJ98X01_(single)_trimmed_contig_7095	heavy-metal-associated domain-containing protein	390	8.58e-29	P:metal ion transport; F:metal ion binding; C:extracellular region		no GO terms	no GO terms	128	33.813	577	41	9.37	0.67	3.80582	0.986	8.834	-4.121	-9.748	DE - Mature
GZUJ98X01_(single)_trimmed_contig_72892	glycine-rich rna-binding protein	347	3.81e-40	P:mRNA export from nucleus; P:circadian rhythm; P:response to cold; P:response to salt stress; P:response to abscisic acid; P:response to zinc ion; P:regulation of stomatal movement; P:vegetative to reproductive phase transition of meristem; P:RNA secondary structure unwinding; P:DNA duplex unwinding; P:innate immune response; P:response to cadmium ion; F:nucleotide binding; F:double-stranded DNA…		F:GO:0000166; F:GO:0003676	F:nucleotide binding; F:nucleic acid binding	43	12.732	236	65	4.31	1.19	1.85673	0.908	3.349	-2.166	-3.988	DE - Mature
GZUJ98X01_(single)_trimmed_contig_7404	hypothetical protein	1428	9.46e-12	P:RNA-templated DNA biosynthetic process; F:nucleic acid binding; F:RNA binding; F:RNA-directed DNA polymerase activity		no IPS match	no IPS match	283	20.216	769	20	3.41	0.09	5.2437	0.923	3.34	-5.571	-6.495	DE - Mature
GZUJ98X01_(single)_trimmed_contig_7446	snf2 domain-containing protein	3093	0	P:nuclear-transcribed mRNA catabolic process; P:DNA metabolic process; P:chromatin organization; P:protein N-linked glycosylation; P:calcium ion transport; P:glucuronoxylan metabolic process; P:post-transcriptional gene silencing by RNA; P:xylan biosynthetic process; P:meristem development; P:regulation of cellular process; P:small regulatory ncRNA processing; F:DNA binding; F:catalytic activity;…		F:GO:0003677; F:GO:0005515; F:GO:0005524; F:GO:0008270	F:DNA binding; F:protein binding; F:ATP binding; F:zinc ion binding	2942	96.527	6580	1191	13.47	2.44	2.4648	0.982	11.504	-2.772	-11.833	DE - Mature
GZUJ98X01_(single)_trimmed_contig_7654	cytochrome p450 83b1	341	4.26e-20	P:cellular process; P:response to stimulus; P:obsolete oxidation-reduction process; F:iron ion binding; F:oxidoreductase activity, acting on paired donors, with incorporation or reduction of molecular oxygen, NAD(P)H as one donor, and incorporation of one atom of oxygen; F:heme binding	Acting on paired donors, with incorporation or reduction of molecular oxygen. The oxygen incorporated need not be derived from O(2)	P:GO:0055114; F:GO:0005506; F:GO:0016705; F:GO:0020037	P:obsolete oxidation-reduction process; F:iron ion binding; F:oxidoreductase activity, acting on paired donors, with incorporation or reduction of molecular oxygen; F:heme binding	169	49.188	519	124	9.64	2.3	2.0674	0.954	7.779	-2.371	-8.132	DE - Mature
GZUJ98X01_(single)_trimmed_contig_7674	cytosolic enolase 3-like	1325	0	P:glycolytic process; F:magnesium ion binding; F:phosphopyruvate hydratase activity; C:phosphopyruvate hydratase complex; C:nucleus	Phosphopyruvate hydratase	P:GO:0006096; F:GO:0000287; F:GO:0004634; C:GO:0000015	P:glycolytic process; F:magnesium ion binding; F:phosphopyruvate hydratase activity; C:phosphopyruvate hydratase complex	667	56.542	1393	212	6.66	1.01	2.72117	0.964	5.84	-3.022	-6.576	DE - Mature
GZUJ98X01_(single)_trimmed_contig_7702	ring finger containing	476	2.77e-43	F:metal ion binding		no GO terms	no GO terms	320	66.704	854	115	11.36	1.53	2.89236	0.987	10.128	-3.199	-10.621	DE - Mature
GZUJ98X01_(single)_trimmed_contig_7834	f-box family protein	2008	4.92e-70	P:response to wounding; P:response to sucrose; P:response to fructose; F:protein binding; F:carbohydrate binding; C:nucleus		no IPS match	no IPS match	1893	97.19	4434	833	13.98	2.63	2.41023	0.982	11.863	-2.718	-12.171	DE - Mature
GZUJ98X01_(single)_trimmed_contig_80916	molybdopterin biosynthesis protein cnx1-like	699	2.59e-41	P:MAPK cascade; P:protein targeting to membrane; P:Mo-molybdopterin cofactor biosynthetic process; P:response to cold; P:auxin-activated signaling pathway; P:abscisic acid-activated signaling pathway; P:systemic acquired resistance, salicylic acid mediated signaling pathway; P:jasmonic acid mediated signaling pathway; P:regulation of plant-type hypersensitive response; P:endoplasmic reticulum unf…		P:GO:0006777	P:Mo-molybdopterin cofactor biosynthetic process	87	14.192	517	45	4.68	0.41	3.51281	0.95	4.356	-3.828	-5.799	DE - Mature
GZUJ98X01_(single)_trimmed_contig_8167	iaa-amino acid hydrolase	415	1.44e-63	P:proteolysis; P:metabolic process; P:response to wounding; P:response to fungus; P:jasmonic acid metabolic process; P:jasmonic acid biosynthetic process; P:response to jasmonic acid; P:auxin metabolic process; P:regulation of systemic acquired resistance; F:metallopeptidase activity; F:IAA-amino acid conjugate hydrolase activity; F:hydrolase activity; F:hippurate hydrolase activity; C:extracellu…		no GO terms	no GO terms	201	48.46	606	125	9.24	1.91	2.27432	0.972	7.707	-2.583	-8.129	DE - Mature
GZUJ98X01_(single)_trimmed_contig_8168	iaa-amino acid hydrolase	479	2.21e-77	P:metabolic process; F:hydrolase activity		P:GO:0008152; F:GO:0016787	P:metabolic process; F:hydrolase activity	478	101.981	1318	311	17.42	4.11	2.08353	0.966	14.104	-2.389	-14.305	DE - Mature
GZUJ98X01_(single)_trimmed_contig_81	conserved hypothetical protein	608	8.83e-18	P:response to oxidative stress		no IPS match	no IPS match	543	92.289	1416	137	14.74	1.43	3.36565	0.994	13.599	-3.676	-14.087	DE - Mature
GZUJ98X01_(single)_trimmed_contig_820	integral membrane protein that regulates cation conductance	454	2.98e-21	P:endoplasmic reticulum to Golgi vesicle-mediated transport; C:nucleolus; C:vacuolar membrane; C:endoplasmic reticulum; C:Golgi apparatus; C:plasma membrane; C:plasmodesma; C:plastid		no GO terms	no GO terms	128	26.985	414	5	5.77	0.07	6.36507	0.967	5.721	-6.677	-8.793	DE - Mature
GZUJ98X01_(single)_trimmed_contig_8261	sulfate transporter	2981	0	P:sulfate transport; P:transmembrane transport; F:secondary active sulfate transmembrane transporter activity; C:integral component of membrane		P:GO:0008272; P:GO:0055085; F:GO:0008271; F:GO:0015116; C:GO:0016020; C:GO:0016021	P:sulfate transport; P:transmembrane transport; F:secondary active sulfate transmembrane transporter activity; F:sulfate transmembrane transporter activity; C:membrane; C:integral component of membrane	2306	82.41	4423	1338	9.39	2.84	1.72523	0.949	7.099	-2.031	-7.384	DE - Mature
GZUJ98X01_(single)_trimmed_contig_84346	probable leucine-rich repeat receptor-like protein kinase at1g35710-like	443	4.23e-23	P:response to UV		no GO terms	no GO terms	38	8.253	790	92	11.29	1.31	3.10741	0.989	10.233	-3.408	-10.786	DE - Mature
GZUJ98X01_(single)_trimmed_contig_8436	phosphoinositide phospholipase c 2-like	902	5.39e-121	P:lipid metabolic process; P:signal transduction; P:intracellular signal transduction; F:phosphatidylinositol phospholipase C activity; F:phospholipase C activity; F:obsolete signal transducer activity; F:calcium ion binding; F:phosphoric diester hydrolase activity; C:nucleus		no IPS match	no IPS match	987	110.369	2115	391	14.84	2.74	2.43724	0.983	12.633	-2.741	-12.927	DE - Mature
GZUJ98X01_(single)_trimmed_contig_8495	hat family dimerization domain containing protein	1764	4.82e-72	P:carbohydrate metabolic process; P:obsolete GTP catabolic process; P:translational elongation; F:nucleotide binding; F:nucleic acid binding; F:DNA binding; F:translation elongation factor activity; F:catalytic activity; F:GTPase activity; F:exonuclease activity; F:hydrolase activity, hydrolyzing O-glycosyl compounds; F:GTP binding; F:protein dimerization activity; C:plastid		no GO terms	no GO terms	945	58.359	1734	357	6.22	1.28	2.28077	0.958	5.19	-2.586	-5.799	DE - Mature
GZUJ98X01_(single)_trimmed_contig_8861	histidine phosphotransfer protein	1131	4.21e-49	P:phosphorelay signal transduction system; P:cytokinin-activated signaling pathway; P:obsolete oxidation-reduction process; P:regulation of cytokinin-activated signaling pathway; F:obsolete signal transducer activity; F:histidine phosphotransfer kinase activity; F:oxidoreductase activity; F:transferase activity, transferring phosphorus-containing groups; F:2-alkenal reductase [NAD(P)+] activity; …		no GO terms	no GO terms	1242	113.868	2975	134	16.65	0.75	4.47249	0.996	16.057	-4.779	-16.753	DE - Mature
GZUJ98X01_(single)_trimmed_contig_9003	cellulose synthase-like protein g3	1742	0	P:cellulose biosynthetic process; F:cellulose synthase (UDP-forming) activity; C:membrane	Cellulose synthase (UDP-forming)	P:GO:0030244; F:GO:0016760; C:GO:0016020	P:cellulose biosynthetic process; F:cellulose synthase (UDP-forming) activity; C:membrane	582	42.684	1267	46	4.6	0.17	4.75803	0.95	4.472	-5.09	-6.775	DE - Mature
GZUJ98X01_(single)_trimmed_contig_9116	peroxidase 2	728	1.89e-60	P:response to oxidative stress; P:obsolete oxidation-reduction process; F:peroxidase activity; F:oxidoreductase activity; F:heme binding; F:metal ion binding		no GO terms	no GO terms	989	136.341	1875	542	16.3	4.71	1.79107	0.959	12.501	-2.096	-12.676	DE - Mature
GZUJ98X01_(single)_trimmed_contig_9162	glutaredoxin	375	7.5e-23	P:methylglyoxal catabolic process to D-lactate via S-lactoyl-glutathione; P:cell redox homeostasis; P:anther development; F:arsenate reductase (glutaredoxin) activity; F:electron transfer activity; F:protein-disulfide reductase activity; C:cellular_component		no GO terms	no GO terms	252	65.259	581	91	9.81	1.54	2.67132	0.976	8.572	-2.981	-9.075	DE - Mature
GZUJ98X01_(single)_trimmed_contig_9178	splicing arginine serine-rich interacting	383	4.15e-14	P:regulation of DNA-templated transcription; F:DNA binding; F:zinc ion binding; F:metal ion binding; C:viral envelope		no IPS match	no IPS match	183	48.885	346	101	5.72	1.67	1.77617	0.925	4.372	-2.082	-4.842	DE - Mature
GZUJ98X01_(single)_trimmed_contig_9197	auxin efflux carrier component	471	3.39e-48	P:transmembrane transport; C:integral component of membrane		P:GO:0055085; C:GO:0016021	P:transmembrane transport; C:integral component of membrane	159	32.777	427	58	5.74	0.78	2.8795	0.964	5.112	-3.186	-6.024	DE - Mature
GZUJ98X01_(single)_trimmed_contig_9198	auxin efflux carrier component	355	4.71e-15	P:transmembrane transport; C:integral component of membrane		P:GO:0055085; C:GO:0016021	P:transmembrane transport; C:integral component of membrane	178	51.107	461	83	8.22	1.48	2.47354	0.972	7.029	-2.78	-7.558	DE - Mature
GZUJ98X01_(single)_trimmed_contig_9287	retrotransposon unclassified	2280	2.19e-12	P:DNA integration; F:nucleic acid binding; F:zinc ion binding		no IPS match	no IPS match	1936	86.361	4667	24	12.96	0.07	7.5325	0.993	12.914	-7.909	-15.143	DE - Mature
GZUJ98X01_(single)_trimmed_contig_9320	myb-related protein 1	2599	5.54e-120	F:DNA binding; F:chromatin binding; F:DNA-binding transcription factor activity; C:nucleus; C:mitochondrion		no IPS match	no IPS match	1448	57.187	3577	747	8.71	1.82	2.25873	0.954	7.246	-2.566	-7.687	DE - Mature
GZUJ98X01_(single)_trimmed_contig_9385	probable aspartic protease at2g35615-like	1831	2.37e-82	P:proteolysis; F:aspartic-type endopeptidase activity	Acting on peptide bonds (peptidases)	P:GO:0006508; F:GO:0004190	P:proteolysis; F:aspartic-type endopeptidase activity	1761	98.644	4275	488	14.78	1.69	3.12855	0.993	13.425	-3.437	-13.858	DE - Mature
GZUJ98X01_(single)_trimmed_contig_9456	ubiquinone biosynthesis protein	505	2.54e-49	P:ubiquinone biosynthetic process		P:GO:0006744	P:ubiquinone biosynthetic process	177	35.927	412	92	5.16	1.15	2.16574	0.929	4.235	-2.469	-4.902	DE - Mature
GZUJ98X01_(single)_trimmed_contig_9755	glutaredoxin	877	2.22e-42	P:cell redox homeostasis; F:electron transfer activity; F:protein-disulfide reductase activity		no IPS match	no IPS match	549	63.837	1909	160	13.78	1.15	3.58287	0.993	12.855	-3.883	-13.429	DE - Mature
GZUJ98X01_(single)_trimmed_contig_9798	udp-glucuronosyl udp-glucosyltransferase	214	7.04e-24	P:metabolic process; F:hexosyltransferase activity		P:GO:0008152; F:GO:0016758	P:metabolic process; F:hexosyltransferase activity	154	68.57	428	123	12.66	3.64	1.79827	0.955	9.725	-2.105	-9.95	DE - Mature
GZUJ98X01_(single)_trimmed_contig_9849	cytosolic alpha-amylase	950	1.04e-168	P:carbohydrate metabolic process; F:alpha-amylase activity; F:calcium ion binding	Alpha-amylase	P:GO:0005975; F:GO:0003824; F:GO:0004556; F:GO:0005509; F:GO:0043169	P:carbohydrate metabolic process; F:catalytic activity; F:alpha-amylase activity; F:calcium ion binding; F:cation binding	1137	123.518	2253	665	15.01	4.43	1.76055	0.958	11.437	-2.066	-11.622	DE - Mature
GZUJ98X01_(single)_trimmed_contig_9871	hat family dimerization domain protein	2876	0	F:nucleic acid binding; F:protein dimerization activity		F:GO:0003676; F:GO:0046983	F:nucleic acid binding; F:protein dimerization activity	2626	100.806	4707	1125	10.36	2.48	2.06261	0.957	8.364	-2.371	-8.693	DE - Mature
GZUJ98X01_(single)_trimmed_contig_10023	atp-dependent protease la domain-containing protein	273	2e-39	P:MAPK cascade; P:regulation of DNA-templated transcription; P:proteolysis; P:protein targeting to membrane; P:response to bacterium; P:systemic acquired resistance, salicylic acid mediated signaling pathway; P:jasmonic acid mediated signaling pathway; P:photosystem II assembly; P:regulation of hydrogen peroxide metabolic process; P:regulation of plant-type hypersensitive response; P:negative reg…		no GO terms	no GO terms	1023	382.619	3504	488	81.25	11.32	2.84349	0.996	72.152	-3.15	-72.221	DE - Mature
GZUJ98X01_(single)_trimmed_contig_10031	phosphatidylinositol-specific phospholipase c	368	1.41e-18	P:lipid metabolic process; P:intracellular signal transduction; F:phosphatidylinositol phospholipase C activity	Phosphoinositide phospholipase C	P:GO:0006629; P:GO:0035556; F:GO:0004435; F:GO:0008081	P:lipid metabolic process; P:intracellular signal transduction; F:phosphatidylinositol phospholipase C activity; F:phosphoric diester hydrolase activity	526	144.084	1343	36	23.1	0.62	5.21948	0.998	22.618	-5.527	-23.284	DE - Mature
GZUJ98X01_(single)_trimmed_contig_10072	conserved hypothetical protein	693	2.62e-16	P:response to oxidative stress; F:molecular_function; C:nucleus		no IPS match	no IPS match	1057	159.983	2499	798	22.83	7.29	1.64694	0.9	16.944	-1.953	-17.056	DE - Mature
GZUJ98X01_(single)_trimmed_contig_10075	cytochrome p450	997	8.44e-72	P:obsolete oxidation-reduction process; F:iron ion binding; F:oxidoreductase activity, acting on paired donors, with incorporation or reduction of molecular oxygen; F:heme binding		P:GO:0055114; F:GO:0005506; F:GO:0016705; F:GO:0020037	P:obsolete oxidation-reduction process; F:iron ion binding; F:oxidoreductase activity, acting on paired donors, with incorporation or reduction of molecular oxygen; F:heme binding	1826	184.852	4524	450	28.73	2.86	3.32847	0.998	26.433	-3.636	-26.682	DE - Mature
GZUJ98X01_(single)_trimmed_contig_10134	cyclophilin	397	7.67e-77	P:protein folding; F:peptidyl-prolyl cis-trans isomerase activity	Peptidylprolyl isomerase	P:GO:0006457; F:GO:0003755	P:protein folding; F:peptidyl-prolyl cis-trans isomerase activity	1742	446.72	4388	986	69.97	15.72	2.15414	0.971	57.294	-2.46	-57.347	DE - Mature
GZUJ98X01_(single)_trimmed_contig_10319	phospholipase c	822	2.18e-105	P:lipid metabolic process; P:intracellular signal transduction; F:phosphatidylinositol phospholipase C activity; F:obsolete signal transducer activity; F:calcium ion binding; F:protein binding	Phosphoinositide phospholipase C	P:GO:0006629; P:GO:0007165; P:GO:0035556; F:GO:0004435; F:GO:0005515; F:GO:0008081	P:lipid metabolic process; P:signal transduction; P:intracellular signal transduction; F:phosphatidylinositol phospholipase C activity; F:protein binding; F:phosphoric diester hydrolase activity	2032	256.745	4762	215	36.67	1.66	4.46535	0.999	35.36	-4.775	-35.681	DE - Mature
GZUJ98X01_(single)_trimmed_contig_1037	protein thylakoid chloroplastic-like	495	1.59e-14	P:DNA-templated transcription; P:signal transduction; P:phospholipid biosynthetic process; P:plastid organization; P:regulation of gene expression; P:photosynthesis, light reaction; P:regulation of cellular protein metabolic process; P:ncRNA metabolic process; P:cellular component biogenesis; P:protein transmembrane import into intracellular organelle; P:protein targeting to chloroplast; P:membra…		no GO terms	no GO terms	4433	875.693	12461	427	159.37	5.46	4.86734	1	155.058	-5.173	-155.144	DE - Mature
GZUJ98X01_(single)_trimmed_contig_10558	benzoquinone reductase	228	1.5e-28	P:response to auxin; P:negative regulation of DNA-templated transcription; P:obsolete oxidation-reduction process; F:FMN binding; F:2-hydroxy-1,4-benzoquinone reductase activity; C:vacuole; C:plasma membrane; C:plasmodesma; C:cytoplasmic vesicle	2-hydroxy-1,4-benzoquinone reductase	F:GO:0010181; F:GO:0016491	F:FMN binding; F:oxidoreductase activity	429	177.776	2067	49	57.39	1.36	5.39912	1	56.332	-5.705	-56.62	DE - Mature
GZUJ98X01_(single)_trimmed_contig_10701	auxin-induced protein 15a	436	7.57e-25	P:response to cold; P:response to auxin; P:response to chitin; P:chlorophyll biosynthetic process; P:defense response to bacterium; C:mitochondrion; C:plasma membrane; C:chloroplast		no GO terms	no GO terms	792	187.076	2020	374	29.33	5.43	2.43335	0.988	24.955	-2.739	-25.105	DE - Mature
GZUJ98X01_(single)_trimmed_contig_10707	poly -specific endoribonuclease-b-like	218	1.2e-14	C:plastid		no IPS match	no IPS match	330	150.005	727	120	21.11	3.48	2.60077	0.987	18.306	-2.905	-18.535	DE - Mature
GZUJ98X01_(single)_trimmed_contig_10970	hypothetical protein VITISV_006791	388	7.33e-12	P:DNA-templated transcription; P:regulation of DNA-templated transcription; P:embryonic pattern specification; P:cotyledon development; P:regulation of cell cycle; F:DNA binding; F:DNA-binding transcription factor activity; C:nucleus		no IPS match	no IPS match	865	220.572	3172	729	51.75	11.89	2.12181	0.971	42.163	-2.427	-42.233	DE - Mature
GZUJ98X01_(single)_trimmed_contig_1098	jacalin-like lectin domain containing protein	873	7.77e-19	P:protein phosphorylation; P:defense response; F:nucleotide binding; F:protein kinase activity; F:protein serine/threonine kinase activity; F:ATP binding; F:transferase activity, transferring phosphorus-containing groups; F:ADP binding		no GO terms	no GO terms	46840	5394.57	128722	2789	933.44	20.22	5.5287	1	917.728	-5.834	-917.747	DE - Mature
GZUJ98X01_(single)_trimmed_contig_11114	4-hydroxy-3-methylbut-2-en-1-yl diphosphate synthase	411	5.99e-30	P:sulfur amino acid metabolic process; P:MAPK cascade; P:pentose-phosphate shunt; P:regulation of translation; P:glycine catabolic process; P:protein targeting to membrane; P:unsaturated fatty acid biosynthetic process; P:phosphatidylglycerol biosynthetic process; P:vitamin metabolic process; P:cellular amino acid biosynthetic process; P:aromatic amino acid family metabolic process; P:lipoate met…	(E)-4-hydroxy-3-methylbut-2-enyl-diphosphate synthase (ferredoxin)	P:GO:0016114; P:GO:0055114; F:GO:0046429	P:terpenoid biosynthetic process; P:obsolete oxidation-reduction process; F:4-hydroxy-3-methylbut-2-en-1-yl diphosphate synthase activity	1257	305.623	2721	485	41.91	7.47	2.48811	0.989	35.894	-2.794	-36.003	DE - Mature
GZUJ98X01_(single)_trimmed_contig_11163	u-box domain-containing protein	274	3.76e-40	P:response to chitin; P:protein ubiquitination; F:ubiquitin-protein transferase activity; C:ubiquitin ligase complex; C:cytoplasm	Forming carbon-nitrogen bonds	P:GO:0016567; F:GO:0004842; C:GO:0000151	P:protein ubiquitination; F:ubiquitin-protein transferase activity; C:ubiquitin ligase complex	311	110.325	1484	507	34.29	11.71	1.55005	0.902	24.829	-1.855	-24.898	DE - Mature
GZUJ98X01_(single)_trimmed_contig_11463	syringolide-induced protein b15-3-5	372	4.79e-29	F:acid phosphatase activity; C:cytoplasmic vesicle	Acid phosphatase	no IPS match	no IPS match	575	155.435	1298	430	22.09	7.32	1.59348	0.9	16.181	-1.9	-16.292	DE - Mature
GZUJ98X01_(single)_trimmed_contig_11506	uncharacterized acetyltransferase at3g50280-like	398	3.53e-28	F:nucleic acid binding; F:acyltransferase activity, transferring groups other than amino-acyl groups		F:GO:0016747	F:acyltransferase activity, transferring groups other than amino-acyl groups	1044	255.261	3678	282	58.5	4.49	3.70365	1	54.913	-4.011	-55.059	DE - Mature
GZUJ98X01_(single)_trimmed_contig_1172	mannose-specific recombinant lectin	392	2.68e-14	P:protein phosphorylation; F:nucleotide binding; F:protein kinase activity; F:protein serine/threonine kinase activity; F:ATP binding; F:transferase activity, transferring phosphorus-containing groups; F:metal ion binding		no GO terms	no GO terms	4341	1088.32	12939	14	208.96	0.23	9.82738	1	208.924	-10.158	-209.171	DE - Mature
GZUJ98X01_(single)_trimmed_contig_11797	telomere repeat binding factor 1	222	8.26e-34	P:cytokinesis by cell plate formation; P:nucleosome assembly; P:regulation of DNA-templated transcription; P:response to salt stress; P:response to ethylene; P:response to auxin; P:response to abscisic acid; P:response to gibberellin; P:response to salicylic acid; P:response to jasmonic acid; P:glucuronoxylan metabolic process; P:xylan biosynthetic process; P:response to cadmium ion; F:chromatin …		no IPS match	no IPS match	492	223.261	1265	357	36.07	10.18	1.82506	0.964	27.858	-2.131	-27.939	DE - Mature
GZUJ98X01_(single)_trimmed_contig_11911	rna polymerase sigma factor rpod-like	906	9.03e-140	P:DNA-templated transcription initiation; P:chloroplast organization; P:response to red light; P:photosystem II assembly; P:response to far red light; P:myo-inositol hexakisphosphate biosynthetic process; P:positive regulation of DNA-templated transcription; P:cellular response to blue light; F:DNA binding; F:DNA-binding transcription factor activity; F:DNA-directed 5'-3' RNA polymerase activity;…	DNA-directed RNA polymerase	P:GO:0006352; P:GO:0006355; F:GO:0003677; F:GO:0003700; F:GO:0016987	P:DNA-templated transcription initiation; P:regulation of DNA-templated transcription; F:DNA binding; F:DNA-binding transcription factor activity; F:sigma factor activity	3351	387.764	5618	1861	39.26	13	1.59455	0.903	28.757	-1.9	-28.82	DE - Mature
GZUJ98X01_(single)_trimmed_contig_11956	proline-rich family protein	411	2.54e-21	P:chloroplast relocation; P:leaf morphogenesis; P:thylakoid membrane organization; P:carotenoid biosynthetic process; P:cell differentiation; P:ncRNA metabolic process; P:plastid transcription; P:glycerophospholipid biosynthetic process; F:kinase activity; F:phosphotransferase activity, alcohol group as acceptor; C:chloroplast thylakoid membrane		no GO terms	no GO terms	905	217.2	2186	378	33.67	5.82	2.53237	0.989	28.982	-2.838	-29.12	DE - Mature
GZUJ98X01_(single)_trimmed_contig_11970	protein	411	2.78e-28	P:regulation of DNA-templated transcription; P:response to abiotic stimulus; P:flower development; P:determination of dorsal/ventral asymmetry; F:DNA binding; F:chromatin binding; F:DNA-binding transcription factor activity; C:nucleus; C:chloroplast		F:GO:0003677	F:DNA binding	597	147.049	1899	45	29.25	0.69	5.4057	0.999	28.71	-5.705	-29.271	DE - Mature
GZUJ98X01_(single)_trimmed_contig_12475	abc transporter family protein	445	1.05e-67	P:gluconeogenesis; P:glycolytic process; P:obsolete ATP catabolic process; P:mRNA export from nucleus; P:protein import into nucleus; P:cytoskeleton organization; P:response to salt stress; P:proteasomal protein catabolic process; P:defense response to bacterium; P:response to cadmium ion; F:ATP binding; F:ABC-type phosphonate transporter activity; C:mitochondrion; C:cytosol	Acting on acid anhydrides	F:GO:0005524; F:GO:0016887	F:ATP binding; F:ATP hydrolysis activity	1241	287.169	2774	612	39.46	8.71	2.17965	0.97	32.444	-2.486	-32.539	DE - Mature
GZUJ98X01_(single)_trimmed_contig_12587	x intrinsic protein	603	1.65e-74	P:transport; F:transporter activity; C:membrane		P:GO:0006810; F:GO:0005215; C:GO:0016020	P:transport; F:transporter activity; C:membrane	1882	314.643	5898	757	61.92	7.95	2.96138	0.996	55.531	-3.268	-55.627	DE - Mature
GZUJ98X01_(single)_trimmed_contig_12588	x intrinsic protein	603	2.52e-73	P:transport; F:transporter activity; C:membrane		P:GO:0006810; F:GO:0005215; C:GO:0016020	P:transport; F:transporter activity; C:membrane	2400	404.126	6364	1624	66.81	17.05	1.97029	0.966	53.059	-2.276	-53.107	DE - Mature
GZUJ98X01_(single)_trimmed_contig_12636	nad-dependent sorbitol dehydrogenase	220	4.93e-24	P:obsolete oxidation-reduction process; F:nucleotide binding; F:L-iditol 2-dehydrogenase activity; F:zinc ion binding; C:cytosol; C:plasmodesma	L-iditol 2-dehydrogenase	no GO terms	no GO terms	460	201.391	1027	306	29.55	8.81	1.74594	0.964	22.446	-2.053	-22.539	DE - Mature
GZUJ98X01_(single)_trimmed_contig_13125	transcription factor une10-like	1863	3.36e-85	P:regulation of DNA-templated transcription; P:biological_process; F:protein dimerization activity		P:GO:0006355; F:GO:0046983	P:regulation of DNA-templated transcription; F:protein dimerization activity	3777	207.291	10954	3753	37.22	12.75	1.54558	0.902	26.926	-1.851	-26.989	DE - Mature
GZUJ98X01_(single)_trimmed_contig_13174	erd6-like transporter	1161	5.4e-129	P:carbohydrate transport; P:transmembrane transport; F:oxidoreductase activity; F:transmembrane transporter activity; C:integral component of membrane		P:GO:0055085; F:GO:0022857; C:GO:0016021	P:transmembrane transport; F:transmembrane transporter activity; C:integral component of membrane	631	52.165	3723	1098	20.3	5.99	1.76085	0.961	15.468	-2.068	-15.606	DE - Mature
GZUJ98X01_(single)_trimmed_contig_13528	protein disulfide isomerase l-2	444	2.56e-71	P:protein folding; P:N-terminal protein myristoylation; P:glycerol ether metabolic process; P:response to oxidative stress; P:cellulose biosynthetic process; P:cell redox homeostasis; P:Golgi vesicle transport; F:protein disulfide isomerase activity; F:dolichyl-diphosphooligosaccharide-protein glycotransferase activity; F:electron transfer activity; F:protein-disulfide reductase activity; C:extra…	Protein disulfide-isomerase; Glycosyltransferases	no GO terms	no GO terms	591	132.36	1361	81	19.41	1.15	4.07709	0.997	18.484	-4.377	-18.995	DE - Mature
GZUJ98X01_(single)_trimmed_contig_1389	zinc finger ccch domain-containing protein 66-like	641	1.13e-77	F:protein binding		F:GO:0005515	F:protein binding	937	152.226	2661	373	26.28	3.68	2.83619	0.994	23.317	-3.141	-23.528	DE - Mature
GZUJ98X01_(single)_trimmed_contig_14007	1-aminocyclopropane-1-carboxylic acid oxidase	1357	4.52e-163	P:iron ion transport; P:ethylene biosynthetic process; P:cellular response to iron ion starvation; P:response to nitrate; P:nitrate transmembrane transport; P:brassinosteroid biosynthetic process; P:obsolete oxidation-reduction process; F:1-aminocyclopropane-1-carboxylate oxidase activity; F:2-oxoglutarate-dependent dioxygenase activity; C:cytoplasm	Acting on paired donors, with incorporation or reduction of molecular oxygen. The oxygen incorporated need not be derived from O(2); Aminocyclopropanecarboxylate oxidase	no GO terms	no GO terms	2504	189.258	7644	1153	35.66	5.38	2.72863	0.995	31.332	-3.035	-31.478	DE - Mature
GZUJ98X01_(single)_trimmed_contig_14139	1-aminocyclopropane-1-carboxylate oxidase-like protein	1343	6.05e-144	P:response to water deprivation; P:response to wounding; P:jasmonic acid mediated signaling pathway; P:hyperosmotic salinity response; P:obsolete oxidation-reduction process; F:2-oxoglutarate-dependent dioxygenase activity; C:cytoplasm	Acting on paired donors, with incorporation or reduction of molecular oxygen. The oxygen incorporated need not be derived from O(2)	P:GO:0055114; F:GO:0016491; F:GO:0016706	P:obsolete oxidation-reduction process; F:oxidoreductase activity; F:2-oxoglutarate-dependent dioxygenase activity	1647	123.928	4229	496	19.93	2.34	3.09036	0.996	18.056	-3.398	-18.373	DE - Mature
GZUJ98X01_(single)_trimmed_contig_14336	senescence dehydration-associated protein	239	1.08e-17	C:nucleus		no GO terms	no GO terms	736	300.452	1949	519	51.63	13.75	1.90878	0.966	40.533	-2.215	-40.594	DE - Mature
GZUJ98X01_(single)_trimmed_contig_1453	conserved hypothetical protein	422	3.43e-49	C:extracellular region; C:mitochondrion; C:chloroplast		no GO terms	no GO terms	1183	274.194	2425	839	36.38	12.59	1.53087	0.902	26.216	-1.837	-26.28	DE - Mature
GZUJ98X01_(single)_trimmed_contig_14543	polcalcin jun	1038	5.2e-54	F:calcium ion binding		F:GO:0005509	F:calcium ion binding	1464	144.736	3897	375	23.77	2.29	3.37572	0.997	21.933	-3.683	-22.24	DE - Mature
GZUJ98X01_(single)_trimmed_contig_14631	thioredoxin h2	639	2.6e-42	P:glycerol ether metabolic process; P:organelle organization; P:cell redox homeostasis; F:protein-disulfide reductase activity; C:obsolete cytoplasmic part		P:GO:0006662; P:GO:0045454; F:GO:0015035	P:glycerol ether metabolic process; P:cell redox homeostasis; F:protein-disulfide reductase activity	979	157.671	2211	170	21.9	1.68	3.7044	0.998	20.557	-4.007	-20.944	DE - Mature
GZUJ98X01_(single)_trimmed_contig_14919	yellow stripe-like protein	2478	2.21e-35	P:oligopeptide transport; P:transmembrane transport; F:oligopeptide transmembrane transporter activity; C:vacuolar membrane; C:chloroplast; C:integral component of membrane		no IPS match	no IPS match	3619	148.826	9780	2168	24.99	5.54	2.17339	0.969	20.52	-2.479	-20.669	DE - Mature
GZUJ98X01_(single)_trimmed_contig_15096	amino acid	602	6.25e-48	P:amino acid transport; F:amino acid transmembrane transporter activity; C:plasma membrane; C:integral component of membrane		no GO terms	no GO terms	1544	258.814	4062	1092	42.72	11.48	1.89579	0.965	33.45	-2.201	-33.523	DE - Mature
GZUJ98X01_(single)_trimmed_contig_15126	kinase interacting kip1-like family protein	2518	0	C:vacuolar membrane		no GO terms	no GO terms	5675	236.615	12207	3274	30.69	8.23	1.8988	0.965	24.049	-2.205	-24.15	DE - Mature
GZUJ98X01_(single)_trimmed_contig_15228	zinc finger an1 domain-containing stress-associated protein 12	1029	8.45e-71	P:protein targeting to membrane; P:toxin catabolic process; P:response to water deprivation; P:response to wounding; P:response to ethylene; P:response to auxin; P:abscisic acid-activated signaling pathway; P:salicylic acid mediated signaling pathway; P:jasmonic acid mediated signaling pathway; P:response to chitin; P:heat acclimation; P:regulation of plant-type hypersensitive response; P:respons…		F:GO:0008270	F:zinc ion binding	5196	516.785	11170	1288	68.72	7.92	3.11716	0.998	62.355	-3.422	-62.448	DE - Mature
GZUJ98X01_(single)_trimmed_contig_15566	cbl-interacting serine threonine-protein kinase 21	1947	0	P:protein phosphorylation; P:signal transduction; F:protein serine/threonine kinase activity; F:ATP binding; C:nucleus	Transferring phosphorus-containing groups	P:GO:0006468; P:GO:0007165; F:GO:0004672; F:GO:0004674; F:GO:0005524; F:GO:0016772	P:protein phosphorylation; P:signal transduction; F:protein kinase activity; F:protein serine/threonine kinase activity; F:ATP binding; F:transferase activity, transferring phosphorus-containing groups	4421	235.318	8349	1987	27.15	6.46	2.07135	0.969	21.936	-2.377	-22.064	DE - Mature
GZUJ98X01_(single)_trimmed_contig_16287	thioredoxin-like 1-1	483	2.61e-36	P:glycerol ether metabolic process; P:cell redox homeostasis; F:electron transfer activity; F:protein-disulfide reductase activity; F:oxidoreductase activity, acting on a sulfur group of donors, disulfide as acceptor; C:chloroplast stroma; C:chloroplast membrane		no IPS match	no IPS match	2241	473.414	3765	1218	49.35	15.96	1.62859	0.903	36.46	-1.934	-36.511	DE - Mature
GZUJ98X01_(single)_trimmed_contig_1640	f-box protein skip28-like	1282	1.4e-74	F:protein binding		F:GO:0005515	F:protein binding	5731	460.224	11041	4134	54.52	20.41	1.41751	0.9	38.035	-1.723	-38.074	DE - Mature
GZUJ98X01_(single)_trimmed_contig_16699	protease inhibitor seed storage lipid transfer protein family protein	778	9.32e-43	P:proteolysis; P:lipid transport; F:peptidase activity; F:lipid binding; C:extracellular region		no GO terms	no GO terms	1700	220.167	5702	1005	46.4	8.18	2.50395	0.99	39.811	-2.81	-39.91	DE - Mature
GZUJ98X01_(single)_trimmed_contig_1677	predicted protein	851	5.08e-52	C:plastid		no IPS match	no IPS match	3321	401.839	6043	2233	44.95	16.61	1.43627	0.9	31.539	-1.742	-31.587	DE - Mature
GZUJ98X01_(single)_trimmed_contig_16896	uridylate kinase	942	2.25e-85	P:UMP biosynthetic process; P:nucleotide phosphorylation; F:cytidylate kinase activity; F:uridine kinase activity; F:ATP binding; F:uridylate kinase activity; F:nucleoside triphosphate adenylate kinase activity; C:nucleus; C:cytosol; C:apoplast	Uridine/cytidine kinase; Transferring phosphorus-containing groups; Nucleoside-triphosphate--adenylate kinase; UMP/CMP kinase	P:GO:0006139; P:GO:0046939; F:GO:0005524; F:GO:0016776; F:GO:0019205; F:GO:0050145	P:nucleobase-containing compound metabolic process; P:nucleotide phosphorylation; F:ATP binding; F:phosphotransferase activity, phosphate group as acceptor; F:nucleobase-containing compound kinase activity; F:nucleoside monophosphate kinase activity	2101	224.423	5533	408	37.18	2.74	3.76228	0.999	34.991	-4.067	-35.226	DE - Mature
GZUJ98X01_(single)_trimmed_contig_16963	mlp-like protein 28	811	9.96e-27	P:defense response; P:response to biotic stimulus		P:GO:0006952; P:GO:0009607	P:defense response; P:response to biotic stimulus	2633	332.404	6203	551	48.42	4.3	3.49319	0.999	44.973	-3.799	-45.133	DE - Mature
GZUJ98X01_(single)_trimmed_contig_17304	atp-dependent zinc metalloprotease ftsh chloroplastic-like	765	1.37e-130	P:proteolysis; P:PSII associated light-harvesting complex II catabolic process; P:cell division; F:ATP-dependent peptidase activity; F:metalloendopeptidase activity; F:ATP binding; F:zinc ion binding; F:microtubule severing ATPase activity; C:chloroplast thylakoid membrane; C:chloroplast envelope; C:integral component of membrane	Acting on peptide bonds (peptidases); Acting on acid anhydrides	P:GO:0006508; F:GO:0004222; F:GO:0005524	P:proteolysis; F:metalloendopeptidase activity; F:ATP binding	1881	263.093	3950	1128	32.69	9.33	1.8089	0.964	25.154	-2.114	-25.243	DE - Mature
GZUJ98X01_(single)_trimmed_contig_17318	atp-dependent protease la domain-containing protein	493	2.71e-31	P:MAPK cascade; P:regulation of DNA-templated transcription; P:proteolysis; P:protein targeting to membrane; P:response to bacterium; P:systemic acquired resistance, salicylic acid mediated signaling pathway; P:jasmonic acid mediated signaling pathway; P:photosystem II assembly; P:regulation of hydrogen peroxide metabolic process; P:regulation of plant-type hypersensitive response; P:negative reg…		P:GO:0006508; F:GO:0004176	P:proteolysis; F:ATP-dependent peptidase activity	2021	410.58	8376	620	107.56	7.96	3.75623	1	101.188	-4.062	-101.27	DE - Mature
GZUJ98X01_(single)_trimmed_contig_17355	n-hydroxycinnamoyl benzoyltransferase-like protein	232	2.89e-16	F:acyltransferase activity, transferring groups other than amino-acyl groups; C:cytoplasm		F:GO:0016747	F:acyltransferase activity, transferring groups other than amino-acyl groups	523	216.647	2072	140	56.54	3.82	3.88763	1	53.487	-4.193	-53.651	DE - Mature
GZUJ98X01_(single)_trimmed_contig_17637	copper ion binding protein	369	1.45e-30	F:copper ion binding; C:nucleus		no GO terms	no GO terms	793	213.648	1815	216	31.14	3.71	3.06928	0.997	28.161	-3.377	-28.363	DE - Mature
GZUJ98X01_(single)_trimmed_contig_17677	delta-1-pyrroline-5-carboxylate dehydrogenase 1 protein	795	1.81e-102	P:response to salt stress; P:proline catabolic process to glutamate; P:obsolete oxidation-reduction process; P:reactive oxygen species metabolic process; F:1-pyrroline-5-carboxylate dehydrogenase activity; F:3-chloroallyl aldehyde dehydrogenase activity; F:aldehyde dehydrogenase (NAD+) activity; F:zinc ion binding; F:cobalt ion binding; C:mitochondrion; C:chloroplast	Acting on the CH-NH group of donors; Aldehyde dehydrogenase (NAD(+)); Acting on the aldehyde or oxo group of donors	P:GO:0008152; P:GO:0055114; F:GO:0016491; F:GO:0016620	P:metabolic process; P:obsolete oxidation-reduction process; F:oxidoreductase activity; F:oxidoreductase activity, acting on the aldehyde or oxo group of donors, NAD or NADP as acceptor	1485	194.104	2914	882	23.2	7.02	1.72458	0.962	17.535	-2.03	-17.653	DE - Mature
GZUJ98X01_(single)_trimmed_contig_18321	upf0548 protein at2g17695	250	1.65e-16	C:chloroplast envelope		no GO terms	no GO terms	453	187.628	1680	428	42.54	10.84	1.97246	0.965	33.799	-2.279	-33.875	DE - Mature
GZUJ98X01_(single)_trimmed_contig_18444	chloroplast oxygen-evolving complex thylakoid lumenal protein	226	1.21e-32	P:pentose-phosphate shunt; P:rRNA processing; P:plastid organization; P:stomatal complex morphogenesis; P:photosystem II assembly; P:positive regulation of catalytic activity; F:calcium ion binding; C:chloroplast thylakoid lumen; C:photosystem II oxygen evolving complex; C:extrinsic component of membrane; C:chloroplast photosystem II		no IPS match	no IPS match	539	229.42	1787	209	50.06	5.85	3.09715	0.998	45.353	-3.402	-45.481	DE - Mature
GZUJ98X01_(single)_trimmed_contig_18515	mki67 fha domain-interacting nucleolar phospho	245	3.34e-22	P:RNA methylation; P:chromatin organization; P:protein import into nucleus; P:protein maturation; F:nucleotide binding; F:RNA binding; C:nucleolus; C:mitochondrion; C:chloroplast		F:GO:0000166; F:GO:0003676	F:nucleotide binding; F:nucleic acid binding	584	228.445	1402	294	36.23	7.6	2.25311	0.97	30.103	-2.56	-30.211	DE - Mature
GZUJ98X01_(single)_trimmed_contig_1868	b chain crystal structure of a plant albumin from cicer arietinum showing hemagglutination	399	7.94e-22	F:calcium ion binding; F:heme binding		no GO terms	no GO terms	6538	1643.04	17874	868	283.59	13.77	4.36421	1	272.646	-4.67	-272.686	DE - Mature
GZUJ98X01_(single)_trimmed_contig_18	cbl-interacting serine threonine-protein kinase 6-like	2027	5.38e-149	P:protein phosphorylation; P:multicellular organism development; P:response to water deprivation; P:stomatal movement; P:basipetal auxin transport; P:calcium-mediated signaling; P:hyperosmotic salinity response; F:calmodulin-dependent protein kinase activity; F:protein binding; F:ATP binding; C:plasma membrane	Calcium/calmodulin-dependent protein kinase	P:GO:0006468; P:GO:0007165; F:GO:0004672; F:GO:0004674; F:GO:0005524; F:GO:0016772	P:protein phosphorylation; P:signal transduction; F:protein kinase activity; F:protein serine/threonine kinase activity; F:ATP binding; F:transferase activity, transferring phosphorus-containing groups	18252	933.328	63840	4911	199.38	15.34	3.70015	1	187.108	-4.006	-187.15	DE - Mature
GZUJ98X01_(single)_trimmed_contig_1932	at4g23490 f16g20_190	1304	1.1e-74	F:glycosyltransferase activity; C:Golgi apparatus		no GO terms	no GO terms	3297	258.92	9735	1265	47.26	6.14	2.94431	0.996	42.323	-3.25	-42.448	DE - Mature
GZUJ98X01_(single)_trimmed_contig_194	sodium-coupled neutral amino acid transporter	1966	8.95e-101	P:amino acid transmembrane transport; P:phosphatidylinositol biosynthetic process; P:response to sucrose; P:response to fructose; F:amine transmembrane transporter activity; F:amino acid transmembrane transporter activity; C:vacuolar membrane; C:plasma membrane; C:integral component of membrane		no GO terms	no GO terms	2936	152.118	6226	1230	20.05	3.96	2.34003	0.986	16.856	-2.646	-17.062	DE - Mature
GZUJ98X01_(single)_trimmed_contig_20253	acylamino-acid-releasing enzyme	595	2.4e-91	P:proteolysis; P:response to cadmium ion; F:serine-type endopeptidase activity; F:serine-type aminopeptidase activity; C:nucleus; C:vacuole; C:cytosol; C:chloroplast	Acting on peptide bonds (peptidases)	P:GO:0006508; F:GO:0008236	P:proteolysis; F:serine-type peptidase activity	1140	194.131	2510	270	26.71	2.87	3.21826	0.997	24.399	-3.523	-24.652	DE - Mature
GZUJ98X01_(single)_trimmed_contig_20391	auxin-induced protein 5ng4	663	1.62e-76	C:membrane		C:GO:0016020	C:membrane	1387	211.442	3728	614	35.6	5.86	2.6029	0.989	30.876	-2.908	-31.013	DE - Mature
GZUJ98X01_(single)_trimmed_contig_20669	wound-induced protein 1-like	733	2e-54	P:biological_process; F:molecular_function; C:cellular_component		no GO terms	no GO terms	1620	233.468	3728	1140	32.2	9.85	1.70887	0.964	24.25	-2.015	-24.334	DE - Mature
GZUJ98X01_(single)_trimmed_contig_2147	delta-12 desaturase	254	9.75e-44	P:lipid metabolic process		P:GO:0006629	P:lipid metabolic process	614	228.606	2211	219	55.11	5.46	3.33534	0.999	50.727	-3.642	-50.858	DE - Mature
GZUJ98X01_(single)_trimmed_contig_21663	amino acid binding	386	1.64e-51	P:dolichol biosynthetic process; F:amino acid binding; C:chloroplast		no GO terms	no GO terms	570	145.49	1420	342	23.29	5.61	2.05364	0.968	18.765	-2.36	-18.913	DE - Mature
GZUJ98X01_(single)_trimmed_contig_21801	beta-glucosidase 11-like	315	5.14e-36	P:carbohydrate metabolic process; P:anthocyanin-containing compound biosynthetic process; P:pigmentation; F:beta-glucosidase activity; F:hexosyltransferase activity; C:plant-type vacuole	Beta-glucosidase	P:GO:0005975; F:GO:0004553	P:carbohydrate metabolic process; F:hydrolase activity, hydrolyzing O-glycosyl compounds	672	211.333	1474	226	29.62	4.54	2.70581	0.995	25.968	-3.011	-26.142	DE - Mature
GZUJ98X01_(single)_trimmed_contig_21930	chloroplast chaperonin 10	409	2.26e-13	P:protein folding; P:tryptophan catabolic process; P:indoleacetic acid biosynthetic process; F:chaperone binding; C:chloroplast stroma; C:chloroplast envelope		no GO terms	no GO terms	479	126.024	1404	209	21.73	3.23	2.75008	0.994	19.128	-3.054	-19.371	DE - Mature
GZUJ98X01_(single)_trimmed_contig_21967	xyloglucan endotransglucosylase hydrolase	218	2.43e-35	P:cellular glucan metabolic process; P:response to water deprivation; P:glucosinolate biosynthetic process; F:hydrolase activity, hydrolyzing O-glycosyl compounds; F:xyloglucan:xyloglucosyl transferase activity; C:cell wall; C:apoplast	Xyloglucan:xyloglucosyl transferase	P:GO:0006073; F:GO:0016762; C:GO:0005618; C:GO:0048046	P:cellular glucan metabolic process; F:xyloglucan:xyloglucosyl transferase activity; C:cell wall; C:apoplast	392	176.083	1447	160	42.02	4.65	3.17577	0.998	38.289	-3.483	-38.447	DE - Mature
GZUJ98X01_(single)_trimmed_contig_22281	s-like rnase	282	1.42e-27	P:aging; P:negative regulation of autophagy; P:rRNA catabolic process; F:RNA binding; F:ribonuclease T2 activity; C:extracellular region; C:vacuole; C:endoplasmic reticulum; C:ER body	Acting on ester bonds	F:GO:0003723; F:GO:0033897	F:RNA binding; F:ribonuclease T2 activity	328	115.535	1026	40	23.03	0.9	4.67745	0.998	22.322	-4.987	-22.872	DE - Mature
GZUJ98X01_(single)_trimmed_contig_22341	dwnn a cchc-type zinc finger	688	6.25e-37	P:protein dephosphorylation; P:sister chromatid cohesion; P:small non-coding RNA-dependent heterochromatin formation; P:meiotic chromosome segregation; F:nucleic acid binding; F:zinc ion binding; C:nucleus		no GO terms	no GO terms	904	135.747	2640	192	24.29	1.77	3.77854	0.998	22.879	-4.087	-23.241	DE - Mature
GZUJ98X01_(single)_trimmed_contig_22494	monothiol glutaredoxin-s17	226	2.46e-32	P:nuclear division; P:nucleolus organization; P:response to heat; P:auxin polar transport; P:cell redox homeostasis; P:regulation of cell cycle; P:reactive oxygen species metabolic process; F:electron transfer activity; F:protein-disulfide reductase activity; C:cytosol		P:GO:0045454; F:GO:0009055; F:GO:0015035	P:cell redox homeostasis; F:electron transfer activity; F:protein-disulfide reductase activity	199	82.708	761	156	21.32	4.37	2.2865	0.986	17.795	-2.592	-17.982	DE - Mature
GZUJ98X01_(single)_trimmed_contig_23015	PREDICTED: uncharacterized protein LOC100786557	263	5.17e-13	P:methylation; F:methyltransferase activity; C:chloroplast		no GO terms	no GO terms	996	371.707	2629	740	63.28	17.81	1.82906	0.965	48.908	-2.135	-48.955	DE - Mature
GZUJ98X01_(single)_trimmed_contig_2320	f-box family protein	488	4.15e-79	P:response to molecule of bacterial origin; P:ubiquitin-dependent protein catabolic process; P:signal transduction; P:response to auxin; P:auxin-activated signaling pathway; P:stomatal complex morphogenesis; P:pollen maturation; P:lateral root formation; P:cellular response to phosphate starvation; P:protein ubiquitination; P:regulation of circadian rhythm; P:stamen development; F:inositol hexaki…		no GO terms	no GO terms	857	184.473	2625	364	34.05	4.72	2.8508	0.995	30.255	-3.156	-30.419	DE - Mature
GZUJ98X01_(single)_trimmed_contig_23451	nad kinase chloroplastic-like	440	1.74e-13	P:NADP biosynthetic process; P:metabolic process; P:pyridine nucleotide biosynthetic process; P:NAD metabolic process; F:NAD+ kinase activity; F:calmodulin binding		no IPS match	no IPS match	1348	303.243	3852	1027	55.42	14.78	1.90676	0.966	43.5	-2.213	-43.556	DE - Mature
GZUJ98X01_(single)_trimmed_contig_2350	heavy metal transport detoxification domain-containing protein	489	9.41e-15	P:metal ion transport; F:metal ion binding		P:GO:0030001; F:GO:0046872	P:metal ion transport; F:metal ion binding	1036	221.039	2212	354	28.64	4.58	2.64461	0.989	24.947	-2.949	-25.121	DE - Mature
GZUJ98X01_(single)_trimmed_contig_235	type 2 ribosome-inactivating protein precursor	561	1.99e-20	P:negative regulation of translation; F:rRNA N-glycosylase activity	rRNA N-glycosylase	P:GO:0017148; F:GO:0030598	P:negative regulation of translation; F:rRNA N-glycosylase activity	2983	547.922	8218	580	92.74	6.55	3.82362	1	87.504	-4.131	-87.601	DE - Mature
GZUJ98X01_(single)_trimmed_contig_23913	medium-chain-fatty-acid-- ligase-like	245	6.44e-45	P:acetate metabolic process; P:glyoxylate cycle; P:butyrate metabolic process; F:acetate-CoA ligase activity; F:o-succinylbenzoate-CoA ligase activity; F:AMP binding; F:butyrate-CoA ligase activity; C:mitochondrion; C:peroxisome	Acetate--CoA ligase; Medium-chain acyl-CoA ligase; o-succinylbenzoate--CoA ligase	P:GO:0008152; F:GO:0003824	P:metabolic process; F:catalytic activity	241	98.988	815	107	21.06	2.76	2.93177	0.993	18.836	-3.235	-19.112	DE - Mature
GZUJ98X01_(single)_trimmed_contig_24748	octicosapeptide phox bem1p domain-containing protein	280	1.75e-19	P:ethylene biosynthetic process; P:response to chitin; F:protein binding; C:nucleus		no GO terms	no GO terms	374	142.414	1694	161	38.3	3.64	3.39533	0.999	35.381	-3.701	-35.574	DE - Mature
GZUJ98X01_(single)_trimmed_contig_24831	chaperone protein dnaj-like protein	603	1.7e-47	F:heat shock protein binding; F:unfolded protein binding; C:cytoplasm		no GO terms	no GO terms	1040	185.521	2045	448	21.47	4.7	2.19159	0.968	17.677	-2.496	-17.853	DE - Mature
GZUJ98X01_(single)_trimmed_contig_2587	ubiquitin-conjugating enzyme e2	1126	1.24e-68	P:postreplication repair; P:ubiquitin-dependent protein catabolic process; P:fatty acid beta-oxidation; P:protein import into peroxisome matrix; P:protein ubiquitination; P:DNA endoreduplication; P:proteasome-mediated ubiquitin-dependent protein catabolic process; P:proteasome assembly; P:cellular macromolecule catabolic process; P:Golgi vesicle transport; P:regulation of transport; P:regulation …		no IPS match	no IPS match	2357	213.507	8996	2632	50.58	14.8	1.77297	0.965	38.635	-2.079	-38.691	DE - Mature
GZUJ98X01_(single)_trimmed_contig_2626	probable protein phosphatase 2c 73-like	1448	3.49e-32	P:metabolic process; P:response to cold; P:response to water deprivation; P:response to abscisic acid; P:hyperosmotic salinity response; F:catalytic activity; F:phosphoprotein phosphatase activity; F:protein serine/threonine phosphatase activity; F:hydrolase activity; C:cellular_component; C:nucleus; C:cytoplasm		no IPS match	no IPS match	5071	358.545	13818	2745	60.41	12	2.33175	0.989	50.74	-2.638	-50.809	DE - Mature
GZUJ98X01_(single)_trimmed_contig_26283	class iv chitinase	455	4.67e-59	P:carbohydrate metabolic process; P:chitin catabolic process; P:somatic embryogenesis; P:cell wall macromolecule catabolic process; P:response to other organism; F:chitinase activity; F:chitin binding; C:plasma membrane; C:plant-type cell wall; C:cytoplasmic vesicle; C:apoplast	Chitinase	P:GO:0006032; P:GO:0016998; F:GO:0004568	P:chitin catabolic process; P:cell wall macromolecule catabolic process; F:chitinase activity	1551	349.56	2676	601	37.23	8.36	2.15489	0.97	30.49	-2.461	-30.589	DE - Mature
GZUJ98X01_(single)_trimmed_contig_26284	class iv chitinase	721	1.7e-113	P:carbohydrate metabolic process; P:chitin catabolic process; P:cell wall macromolecule catabolic process; F:chitinase activity; F:chitin binding; C:cell wall	Chitinase	P:GO:0005975; P:GO:0006032; P:GO:0016998; F:GO:0004568	P:carbohydrate metabolic process; P:chitin catabolic process; P:cell wall macromolecule catabolic process; F:chitinase activity	1910	279.094	5489	731	48.2	6.42	2.90839	0.996	43.034	-3.215	-43.154	DE - Mature
GZUJ98X01_(single)_trimmed_contig_26325	PREDICTED: uncharacterized protein LOC100255767	800	1.63e-29	F:molecular_function; C:cellular_component		no GO terms	no GO terms	1288	153.415	5836	1235	46.18	9.77	2.24084	0.971	38.304	-2.546	-38.388	DE - Mature
GZUJ98X01_(single)_trimmed_contig_2709	zinc finger ran-binding domain-containing protein 2-like	783	1.83e-50	P:biological_process; P:phosphorylation; F:zinc ion binding; F:kinase activity; C:intracellular anatomical structure; C:nucleus		no IPS match	no IPS match	5911	791.955	19913	411	161	3.32	5.59973	1	158.423	-5.904	-158.533	DE - Mature
GZUJ98X01_(single)_trimmed_contig_2731	udp-glycosyltransferase 85a1	809	1.93e-82	P:metabolic process; F:hexosyltransferase activity		P:GO:0008152; F:GO:0016758	P:metabolic process; F:hexosyltransferase activity	2347	301.309	4541	1475	35.53	11.54	1.62239	0.902	26.216	-1.928	-26.287	DE - Mature
GZUJ98X01_(single)_trimmed_contig_2765	myosin heavy chain	464	1.15e-28	P:DNA repair; P:biological_process; P:response to abscisic acid; P:response to cadmium ion; P:nucleic acid phosphodiester bond hydrolysis; F:molecular_function; F:nuclease activity; F:ATP binding; F:zinc ion binding; C:cytoplasm; C:cytosol; C:plasma membrane		no GO terms	no GO terms	2075	435.58	5775	843	78.79	11.5	2.77638	0.996	69.537	-3.082	-69.606	DE - Mature
GZUJ98X01_(single)_trimmed_contig_27905	peroxisomal biogenesis factor 11 family protein	407	1.69e-12	P:pentose-phosphate shunt; P:peroxisome fission; F:identical protein binding; C:integral component of peroxisomal membrane		no GO terms	no GO terms	881	224.418	2493	785	38.78	12.21	1.66725	0.903	28.92	-1.973	-28.988	DE - Mature
GZUJ98X01_(single)_trimmed_contig_2910	uncharacterized wd repeat-containing protein alr3466-like	1603	1.86e-146	F:protein binding		F:GO:0005515	F:protein binding	5479	348.235	13154	2124	51.95	8.39	2.63038	0.99	45.195	-2.937	-45.29	DE - Mature
GZUJ98X01_(single)_trimmed_contig_2959	hypothetical protein MTR_6g023580	1428	5.14e-20	P:protein targeting to membrane; P:positive regulation of flavonoid biosynthetic process; P:regulation of plant-type hypersensitive response; P:response to cadmium ion; F:molecular_function; C:nucleus		no GO terms	no GO terms	5715	419.667	12495	3724	55.39	16.51	1.74629	0.965	42.068	-2.052	-42.118	DE - Mature
GZUJ98X01_(single)_trimmed_contig_2961	riboflavin biosynthesis protein chloroplastic-like	1969	0	P:riboflavin biosynthetic process; F:GTP cyclohydrolase II activity; F:3,4-dihydroxy-2-butanone-4-phosphate synthase activity	GTP cyclohydrolase II; 3,4-dihydroxy-2-butanone-4-phosphate synthase	P:GO:0009231; F:GO:0003935; F:GO:0008686	P:riboflavin biosynthetic process; F:GTP cyclohydrolase II activity; F:3,4-dihydroxy-2-butanone-4-phosphate synthase activity	8661	453.676	18348	4553	58.99	14.64	2.01055	0.971	47.184	-2.317	-47.24	DE - Mature
GZUJ98X01_(single)_trimmed_contig_2994	chaperone protein dnaj chloroplastic-like	1050	1.09e-12	P:protein folding; F:heat shock protein binding; F:unfolded protein binding		no GO terms	no GO terms	3123	309.026	13577	3080	81.86	18.57	2.14018	0.971	66.884	-2.446	-66.929	DE - Mature
GZUJ98X01_(single)_trimmed_contig_30039	stem-specific protein expressed	232	3.34e-12	P:response to auxin; P:response to aluminum ion; C:plasma membrane		no GO terms	no GO terms	515	205.233	2674	705	72.97	19.24	1.92319	0.966	57.445	-2.229	-57.488	DE - Mature
GZUJ98X01_(single)_trimmed_contig_3055	enzyme of the cupin superfamily	498	4.27e-44	P:maltose metabolic process; P:starch biosynthetic process; P:isopentenyl diphosphate biosynthetic process, methylerythritol 4-phosphate pathway; C:nucleus; C:chloroplast		no GO terms	no GO terms	3332	662.502	7006	1134	89.06	14.42	2.62671	0.99	77.455	-2.933	-77.51	DE - Mature
GZUJ98X01_(single)_trimmed_contig_30598	vacuolar-processing enzyme	596	4.17e-42	P:proteolysis; P:vacuolar protein processing; P:Golgi vesicle transport; P:membrane fusion; F:cysteine-type endopeptidase activity; C:lytic vacuole	Acting on peptide bonds (peptidases)	P:GO:0006508; F:GO:0004197	P:proteolysis; F:cysteine-type endopeptidase activity	717	131.738	1899	133	20.17	1.41	3.83844	0.997	19.042	-4.142	-19.487	DE - Mature
GZUJ98X01_(single)_trimmed_contig_3077	af195115_13 contains weak similarity to cerevisiae bob1 protein pir:s45444	494	1.33e-53	F:glycosyltransferase activity; C:extracellular region; C:nucleus; C:endoplasmic reticulum; C:Golgi apparatus		no GO terms	no GO terms	548	113.765	1972	184	25.27	2.36	3.42057	0.998	23.38	-3.728	-23.676	DE - Mature
GZUJ98X01_(single)_trimmed_contig_3189	dna binding	497	5.42e-31	P:regulation of DNA-templated transcription; P:toxin catabolic process; P:response to heat; F:DNA-binding transcription factor activity; F:sequence-specific DNA binding; C:nucleus		P:GO:0009408; F:GO:0003700; C:GO:0005634	P:response to heat; F:DNA-binding transcription factor activity; C:nucleus	571	114.515	1649	331	21	4.22	2.31507	0.986	17.606	-2.623	-17.801	DE - Mature
GZUJ98X01_(single)_trimmed_contig_319	jacalin-like lectin domain containing expressed	852	3.02e-28	P:cellular process; F:monosaccharide binding		no GO terms	no GO terms	68245	8076.47	183965	854	1366.92	6.35	7.74996	1	1362.75	-8.057	-1362.78	DE - Mature
GZUJ98X01_(single)_trimmed_contig_3221	hypothetical protein MTR_2g063200	1100	2.27e-160	F:heat shock protein binding; F:unfolded protein binding; C:cytoplasm		no IPS match	no IPS match	5536	520.138	12657	2954	72.84	17	2.0992	0.971	59.132	-2.405	-59.181	DE - Mature
GZUJ98X01_(single)_trimmed_contig_3242	unnamed protein product	1587	1.43e-82	P:para-aminobenzoic acid metabolic process; C:plasma membrane; C:integral component of membrane		C:GO:0016021	C:integral component of membrane	5353	342.64	9843	3065	39.26	12.23	1.68264	0.903	29.395	-1.989	-29.462	DE - Mature
GZUJ98X01_(single)_trimmed_contig_3268	beta- -glucanase	1230	1.46e-81	P:carbohydrate metabolic process; F:hydrolase activity, hydrolyzing O-glycosyl compounds		P:GO:0005975; F:GO:0004553	P:carbohydrate metabolic process; F:hydrolase activity, hydrolyzing O-glycosyl compounds	2490	209.019	6574	559	33.84	2.88	3.55459	0.999	31.53	-3.862	-31.766	DE - Mature
GZUJ98X01_(single)_trimmed_contig_3341	unnamed protein product	1565	8.77e-85	P:biological_process; F:molecular_function; C:nucleus		no IPS match	no IPS match	2800	181.795	5447	1821	22.03	7.37	1.57973	0.9	16.087	-1.887	-16.197	DE - Mature
GZUJ98X01_(single)_trimmed_contig_339	beta-amylase chloroplastic-like isoform 2	297	9.01e-42	P:maltose biosynthetic process; P:starch catabolic process; P:response to cold; F:beta-amylase activity; F:cation binding; C:chloroplast stroma	Beta-amylase	P:GO:0000272; P:GO:0005975; F:GO:0016161	P:polysaccharide catabolic process; P:carbohydrate metabolic process; F:beta-amylase activity	3164	1064.2	8909	938	189.9	19.99	3.24789	0.999	173.847	-3.554	-173.884	DE - Mature
GZUJ98X01_(single)_trimmed_contig_3534	ring finger protein 10-like	698	2.25e-19	P:sister chromatid cohesion; P:reciprocal meiotic recombination; P:regulation of chromosome organization; P:meiotic DNA double-strand break formation; P:meiotic chromosome segregation		no GO terms	no GO terms	944	141.781	2599	881	23.57	7.99	1.56068	0.9	17.121	-1.867	-17.222	DE - Mature
GZUJ98X01_(single)_trimmed_contig_3545	sucrose phosphate synthase	442	1.95e-65	P:sucrose biosynthetic process; F:sucrose-phosphate synthase activity	Sucrose-phosphate synthase	no GO terms	no GO terms	1247	289.059	3527	349	50.52	5	3.33685	0.999	46.506	-3.643	-46.648	DE - Mature
GZUJ98X01_(single)_trimmed_contig_35495	unnamed protein product	220	1.47e-15	C:nucleus		no GO terms	no GO terms	479	215.273	1547	103	44.52	2.96	3.91078	0.999	42.148	-4.215	-42.358	DE - Mature
GZUJ98X01_(single)_trimmed_contig_35	f-box family protein	1519	5.67e-97	F:protein binding		F:GO:0005515	F:protein binding	3310	223.826	15690	3080	65.39	12.84	2.34842	0.989	55.046	-2.655	-55.11	DE - Mature
GZUJ98X01_(single)_trimmed_contig_3613	s-adenosyl-l-methionine synthetase	278	3.27e-36	P:methionine metabolic process; P:S-adenosylmethionine biosynthetic process; P:one-carbon metabolic process; P:response to cold; P:response to salt stress; P:lignin biosynthetic process; F:methionine adenosyltransferase activity; F:ATP binding; F:metal ion binding; C:cell wall; C:nucleolus; C:cytoplasm; C:plasma membrane	Methionine adenosyltransferase	no GO terms	no GO terms	2246	745.439	12395	621	282.26	14.14	4.31917	1	271.012	-4.625	-271.052	DE - Mature
GZUJ98X01_(single)_trimmed_contig_37006	protein	315	2.46e-24	P:pentose-phosphate shunt; P:peroxisome fission; F:identical protein binding; C:integral component of peroxisomal membrane		P:GO:0016559; C:GO:0005779	P:peroxisome fission; C:integral component of peroxisomal membrane	714	217.457	3320	973	66.72	19.55	1.77095	0.965	50.941	-2.077	-50.983	DE - Mature
GZUJ98X01_(single)_trimmed_contig_3702	probable membrane-associated 30 kda chloroplastic-like	424	2.7e-62	P:thylakoid membrane organization; P:vesicle organization; P:modulation by virus of host process; C:plastid chromosome; C:chloroplast thylakoid membrane; C:chloroplast stroma; C:chloroplast inner membrane		no GO terms	no GO terms	1123	258.474	2454	792	36.64	11.83	1.63097	0.903	27.094	-1.937	-27.163	DE - Mature
GZUJ98X01_(single)_trimmed_contig_3721	proteophosphoglycan ppg4	3362	4.35e-24	P:DNA topological change; P:neurogenesis; F:DNA binding; F:DNA topoisomerase type I (single strand cut, ATP-independent) activity; F:extracellular matrix structural constituent; C:chromosome; C:extracellular matrix		no IPS match	no IPS match	3998	122.252	12119	435	22.82	0.82	4.79853	0.998	22.173	-5.106	-22.753	DE - Mature
GZUJ98X01_(single)_trimmed_contig_3838	probable plastid-lipid-associated protein chloroplastic-like	755	5.64e-70	P:pentose-phosphate shunt; P:thylakoid membrane organization; F:structural molecule activity; C:chloroplast thylakoid membrane; C:chloroplast envelope		F:GO:0005198; C:GO:0009507	F:structural molecule activity; C:chloroplast	2981	391.43	7872	930	66.01	7.8	3.08114	0.998	59.741	-3.387	-59.837	DE - Mature
GZUJ98X01_(single)_trimmed_contig_3840	kinase-like domain containing partial	856	7.29e-99	P:protein phosphorylation; P:transmembrane receptor protein tyrosine kinase signaling pathway; F:G protein-coupled receptor kinase activity; F:ATP binding; C:extracellular region; C:nucleus; C:cytosol; C:plasma membrane; C:integral component of membrane; C:cytoplasmic vesicle	[G-protein-coupled receptor] kinase	P:GO:0006468; F:GO:0004672; F:GO:0005524; F:GO:0016772	P:protein phosphorylation; F:protein kinase activity; F:ATP binding; F:transferase activity, transferring phosphorus-containing groups	1722	212.928	3649	1115	26.99	8.25	1.70996	0.963	20.331	-2.016	-20.43	DE - Mature
GZUJ98X01_(single)_trimmed_contig_3852	aldehyde dehydrogenase	332	7.34e-28	P:vegetative to reproductive phase transition of meristem; P:protein desumoylation; P:response to cadmium ion; P:hydrogen peroxide biosynthetic process; P:obsolete oxidation-reduction process; F:retinal dehydrogenase activity; F:3-chloroallyl aldehyde dehydrogenase activity; F:aldehyde dehydrogenase (NAD+) activity; F:ATP binding; C:mitochondrion; C:chloroplast	Retinal dehydrogenase; Aldehyde dehydrogenase (NAD(+)); Acting on the aldehyde or oxo group of donors	P:GO:0008152; P:GO:0055114; F:GO:0016491; F:GO:0016620	P:metabolic process; P:obsolete oxidation-reduction process; F:oxidoreductase activity; F:oxidoreductase activity, acting on the aldehyde or oxo group of donors, NAD or NADP as acceptor	1436	430.247	3684	663	70.25	12.64	2.4745	0.989	60.063	-2.78	-60.127	DE - Mature
GZUJ98X01_(single)_trimmed_contig_387	zinc finger ran-binding domain-containing protein 2-like	388	3.18e-31	F:zinc ion binding; C:nucleus		F:GO:0008270	F:zinc ion binding	3161	834.83	8707	662	142.06	10.8	3.7174	1	133.421	-4.023	-133.482	DE - Mature
GZUJ98X01_(single)_trimmed_contig_388	binding protein	241	4.79e-11	C:nucleus		no GO terms	no GO terms	971	416.834	2567	156	67.43	4.1	4.03969	1	64.161	-4.346	-64.308	DE - Mature
GZUJ98X01_(single)_trimmed_contig_4107	probable xyloglucan endotransglucosylase hydrolase protein 23	314	8.79e-50	P:cellular glucan metabolic process; F:hydrolase activity, hydrolyzing O-glycosyl compounds; F:xyloglucan:xyloglucosyl transferase activity; C:cell wall; C:apoplast	Xyloglucan:xyloglucosyl transferase	P:GO:0005975; F:GO:0004553	P:carbohydrate metabolic process; F:hydrolase activity, hydrolyzing O-glycosyl compounds	828	259.777	2030	692	40.93	13.95	1.55289	0.902	29.663	-1.859	-29.721	DE - Mature
GZUJ98X01_(single)_trimmed_contig_4117	jasmonate-induced protein	639	3.96e-14	F:monosaccharide binding		no GO terms	no GO terms	11603	1846.89	32927	1151	326.21	11.4	4.8387	1	317.211	-5.144	-317.253	DE - Mature
GZUJ98X01_(single)_trimmed_contig_4176	peroxidase 4	1401	2.24e-137	P:response to oxidative stress; P:obsolete oxidation-reduction process; F:peroxidase activity; F:heme binding; F:metal ion binding; C:cell wall; C:obsolete cytoplasmic part; C:apoplast	Peroxidase	P:GO:0006979; P:GO:0055114; F:GO:0004601; F:GO:0020037	P:response to oxidative stress; P:obsolete oxidation-reduction process; F:peroxidase activity; F:heme binding	5770	423.291	16088	906	72.7	4.09	4.15178	1	69.434	-4.456	-69.576	DE - Mature
GZUJ98X01_(single)_trimmed_contig_41	chlorophyllide a chloroplastic-like	532	1.69e-44	P:aromatic amino acid family biosynthetic process; P:leaf morphogenesis; P:chlorophyll biosynthetic process; P:cysteine biosynthetic process; P:cell differentiation; P:positive regulation of DNA-templated transcription; P:obsolete oxidation-reduction process; F:iron ion binding; F:chlorophyllide a oxygenase [overall] activity; F:oxidoreductase activity, acting on paired donors, with incorporation…	Chlorophyllide a oxygenase	P:GO:0055114; F:GO:0010277	P:obsolete oxidation-reduction process; F:chlorophyllide a oxygenase [overall] activity	4752	918.094	12440	740	148.03	8.81	4.0706	1	141.009	-4.377	-141.077	DE - Mature
GZUJ98X01_(single)_trimmed_contig_4278	chitinase	215	3.06e-18	P:polysaccharide catabolic process; P:chitin catabolic process; P:defense response; P:cell wall macromolecule catabolic process; F:chitinase activity; F:chitin binding; C:extracellular space; C:cell wall	Chitinase	F:GO:0008061	F:chitin binding	349	161.363	1596	238	46.99	7.01	2.74487	0.996	41.354	-3.051	-41.467	DE - Mature
GZUJ98X01_(single)_trimmed_contig_4295	PREDICTED: uncharacterized protein LOC100807336	431	4.04e-18	C:mitochondrion; C:integral component of membrane		no GO terms	no GO terms	1027	243.121	2405	340	35.33	4.99	2.82378	0.995	31.308	-3.128	-31.464	DE - Mature
GZUJ98X01_(single)_trimmed_contig_4314	receptor protein kinase perk1	1651	1.8e-168	P:response to wounding; P:response to fungus; P:protein autophosphorylation; P:regulation of unidimensional cell growth; P:plant-type cell wall cellulose metabolic process; P:cell wall pectin metabolic process; F:protein serine/threonine kinase activity; F:ATP binding; C:plasma membrane; C:plastid	Transferring phosphorus-containing groups	P:GO:0006468; F:GO:0004672; F:GO:0004674; F:GO:0005524; F:GO:0016772	P:protein phosphorylation; F:protein kinase activity; F:protein serine/threonine kinase activity; F:ATP binding; F:transferase activity, transferring phosphorus-containing groups	3567	218.738	10591	1482	40.61	5.68	2.83787	0.995	36.039	-3.143	-36.176	DE - Mature
GZUJ98X01_(single)_trimmed_contig_4447	atp-dependent zinc metalloprotease ftsh chloroplastic-like	372	8.44e-56	P:obsolete ATP catabolic process; P:proteolysis; P:microtubule nucleation; P:chloroplast fission; P:cell division; F:metalloendopeptidase activity; F:ATP binding; F:microtubule severing ATPase activity; C:plasma membrane; C:chloroplast envelope	Acting on peptide bonds (peptidases); Acting on acid anhydrides	P:GO:0006508; F:GO:0004222; F:GO:0005524	P:proteolysis; F:metalloendopeptidase activity; F:ATP binding	1037	285.258	2717	752	46.24	12.8	1.853	0.965	35.911	-2.159	-35.976	DE - Mature
GZUJ98X01_(single)_trimmed_contig_4488	uncharacterized isochorismatase family protein pnca	287	1.15e-28	P:response to abscisic acid; P:pyridine nucleotide salvage; F:nicotinamidase activity; C:nucleus; C:cytoplasm	Nicotinamidase	P:GO:0008152; F:GO:0003824	P:metabolic process; F:catalytic activity	1475	500.652	3407	940	75.15	20.73	1.85805	0.965	58.42	-2.164	-58.46	DE - Mature
GZUJ98X01_(single)_trimmed_contig_4493	vacuolar processing enzyme	1026	9.13e-169	P:proteolysis; P:vacuolar protein processing; F:cysteine-type endopeptidase activity; C:lytic vacuole	Acting on peptide bonds (peptidases)	P:GO:0006508; F:GO:0004197	P:proteolysis; F:cysteine-type endopeptidase activity	2699	274.382	7739	634	47.75	3.91	3.61026	0.999	44.618	-3.916	-44.79	DE - Mature
GZUJ98X01_(single)_trimmed_contig_4505	protein iq-domain 32-like	733	5.74e-24	C:obsolete intracellular part		no GO terms	no GO terms	2653	372.72	7235	1074	62.49	9.28	2.75143	0.996	55.022	-3.058	-55.106	DE - Mature
GZUJ98X01_(single)_trimmed_contig_46357	acyl-activating enzyme 7	209	6.59e-34	P:acetate metabolic process; P:glyoxylate cycle; P:butyrate metabolic process; F:acetate-CoA ligase activity; F:o-succinylbenzoate-CoA ligase activity; F:AMP binding; F:butyrate-CoA ligase activity; C:mitochondrion; C:peroxisome	Acetate--CoA ligase; Medium-chain acyl-CoA ligase; o-succinylbenzoate--CoA ligase	no GO terms	no GO terms	124	57.703	785	199	23.78	6.03	1.97952	0.963	18.915	-2.286	-19.053	DE - Mature
GZUJ98X01_(single)_trimmed_contig_4915	ef hand family expressed	1054	1.67e-40	P:organelle localization; F:calcium ion binding		F:GO:0005509	F:calcium ion binding	20650	1991.84	73181	2144	439.55	12.88	5.09282	1	429.434	-5.399	-429.468	DE - Mature
GZUJ98X01_(single)_trimmed_contig_4971	ascorbate peroxidase	1130	1.98e-90	P:response to oxidative stress; P:obsolete oxidation-reduction process; F:L-ascorbate peroxidase activity; F:heme binding; C:mitochondrion; C:vacuolar membrane; C:peroxisomal membrane; C:Golgi apparatus; C:cytosol; C:plasmodesma; C:chloroplast envelope	L-ascorbate peroxidase	no IPS match	no IPS match	29778	2740.57	83592	703	468.31	3.94	6.89312	1	465.454	-7.2	-465.509	DE - Mature
GZUJ98X01_(single)_trimmed_contig_5034	alpha-glucosidase yihq	2871	0	P:carbohydrate metabolic process; F:carbohydrate binding; F:maltose alpha-glucosidase activity; C:plastid	Alpha-glucosidase	P:GO:0005975; F:GO:0004553	P:carbohydrate metabolic process; F:hydrolase activity, hydrolyzing O-glycosyl compounds	5114	181.808	12393	2043	27.33	4.5	2.60249	0.989	23.7	-2.907	-23.877	DE - Mature
GZUJ98X01_(single)_trimmed_contig_51005	pinus taeda anonymous locus umn_2174_01 genomic sequence	244	1.04e-11	F:glycosyltransferase activity		no IPS match	no IPS match	20	7.697	1116	80	28.95	2.08	3.79891	0.999	27.295	-4.108	-27.603	DE - Mature
GZUJ98X01_(single)_trimmed_contig_5205	zinc finger ran-binding domain-containing protein 2-like	263	1.04e-13	F:zinc ion binding; C:nucleus		no IPS match	no IPS match	1327	522.369	3617	268	87.06	6.45	3.75464	1	81.904	-4.06	-82.005	DE - Mature
GZUJ98X01_(single)_trimmed_contig_5215	peroxisomal membrane protein 11b-like	338	4.7e-43	P:pentose-phosphate shunt; P:peroxisome fission; F:identical protein binding; C:integral component of peroxisomal membrane		P:GO:0016559; C:GO:0005779	P:peroxisome fission; C:integral component of peroxisomal membrane	408	116.16	1700	280	31.84	5.24	2.6032	0.989	27.618	-2.908	-27.77	DE - Mature
GZUJ98X01_(single)_trimmed_contig_5236	unnamed protein product	2884	2.15e-16	P:proteolysis; F:cysteine-type peptidase activity	Acting on peptide bonds (peptidases)	P:GO:0006508; F:GO:0008234	P:proteolysis; F:cysteine-type peptidase activity	5515	208.311	14653	4670	32.16	10.25	1.64964	0.902	23.889	-1.956	-23.969	DE - Mature
GZUJ98X01_(single)_trimmed_contig_5290	molybdopterin partial	469	2.97e-69	P:MAPK cascade; P:protein targeting to membrane; P:Mo-molybdopterin cofactor biosynthetic process; P:response to cold; P:auxin-activated signaling pathway; P:abscisic acid-activated signaling pathway; P:systemic acquired resistance, salicylic acid mediated signaling pathway; P:jasmonic acid mediated signaling pathway; P:regulation of plant-type hypersensitive response; P:endoplasmic reticulum unf…		P:GO:0006777; P:GO:0032324	P:Mo-molybdopterin cofactor biosynthetic process; P:molybdopterin cofactor biosynthetic process	799	170.488	1780	518	24.03	6.99	1.78147	0.963	18.384	-2.087	-18.502	DE - Mature
GZUJ98X01_(single)_trimmed_contig_5295	phosphoglycerate bisphosphoglycerate mutase family protein	427	1.75e-37	P:metabolic process; F:phosphoglycerate mutase activity; C:mitochondrion; C:chloroplast	Intramolecular transferases	no GO terms	no GO terms	1651	399.628	4129	945	61.22	14.01	2.12755	0.971	49.918	-2.433	-49.977	DE - Mature
GZUJ98X01_(single)_trimmed_contig_5411	cytochrome p450	689	8.15e-75	P:response to red or far red light; P:indole-containing compound biosynthetic process; P:defense response to bacterium; P:carboxylic acid biosynthetic process; P:obsolete oxidation-reduction process; F:iron ion binding; F:electron transfer activity; F:oxidoreductase activity, acting on paired donors, with incorporation or reduction of molecular oxygen, NAD(P)H as one donor, and incorporation of o…	Acting on paired donors, with incorporation or reduction of molecular oxygen. The oxygen incorporated need not be derived from O(2)	P:GO:0055114; F:GO:0005506; F:GO:0016705; F:GO:0020037	P:obsolete oxidation-reduction process; F:iron ion binding; F:oxidoreductase activity, acting on paired donors, with incorporation or reduction of molecular oxygen; F:heme binding	1142	170.894	2364	595	21.72	5.47	1.98941	0.963	17.311	-2.296	-17.462	DE - Mature
GZUJ98X01_(single)_trimmed_contig_5433	btb poz and taz domain-containing protein 3	991	1.98e-56	P:regulation of DNA-templated transcription; P:embryo sac development; P:pollen development; P:response to wounding; P:response to salt stress; P:response to auxin; P:response to gibberellin; P:response to salicylic acid; P:response to jasmonic acid; P:proximal/distal pattern formation; P:floral organ abscission; P:histone acetylation; P:response to hydrogen peroxide; P:flower morphogenesis; P:ph…	Histone acetyltransferase	P:GO:0006355; F:GO:0003712; F:GO:0004402; F:GO:0008270; C:GO:0005634	P:regulation of DNA-templated transcription; F:transcription coregulator activity; F:histone acetyltransferase activity; F:zinc ion binding; C:nucleus	1525	158.39	3685	820	23.54	5.24	2.16748	0.969	19.317	-2.474	-19.474	DE - Mature
GZUJ98X01_(single)_trimmed_contig_5513	protein proton gradient regulation	223	2.18e-27	P:response to water deprivation; P:response to blue light; P:response to high light intensity; P:response to sucrose; P:photosynthetic electron transport in photosystem I; P:response to red light; P:photoprotection; P:regulation of proton transport; P:response to far red light; P:cellular response to light intensity; F:electron transfer activity; C:chloroplast thylakoid membrane		no GO terms	no GO terms	842	371.471	3437	412	97.57	11.7	3.05993	0.999	88.173	-3.366	-88.237	DE - Mature
GZUJ98X01_(single)_trimmed_contig_55216	snakin-1	395	1.01e-32	P:defense response; P:response to gibberellin; C:extracellular region; C:cell wall		no GO terms	no GO terms	74	17.195	3236	1086	51.86	17.41	1.57471	0.903	37.81	-1.881	-37.857	DE - Mature
GZUJ98X01_(single)_trimmed_contig_5720	amino acid permease	2246	1.26e-162	P:aspartate transmembrane transport; P:tryptophan transport; F:acidic amino acid transmembrane transporter activity; F:neutral amino acid transmembrane transporter activity; C:plasma membrane; C:integral component of membrane		no IPS match	no IPS match	5658	260.098	12413	1511	34.99	4.26	3.03802	0.998	31.565	-3.344	-31.741	DE - Mature
GZUJ98X01_(single)_trimmed_contig_5926	brassinosteroid-regulated protein bru1	367	6.55e-45	P:cellular glucan metabolic process; P:aging; P:gibberellic acid mediated signaling pathway; P:response to brassinosteroid; P:plant-type cell wall loosening; F:hydrolase activity, hydrolyzing O-glycosyl compounds; F:xyloglucan:xyloglucosyl transferase activity; C:Golgi apparatus; C:plasma membrane; C:plant-type cell wall; C:apoplast	Xyloglucan:xyloglucosyl transferase	P:GO:0005975; F:GO:0004553	P:carbohydrate metabolic process; F:hydrolase activity, hydrolyzing O-glycosyl compounds	556	147.605	1664	530	28.7	9.14	1.65078	0.902	21.323	-1.957	-21.413	DE - Mature
GZUJ98X01_(single)_trimmed_contig_6025	cdgsh iron-sulfur domain-containing protein 2-like	271	5.46e-15	P:pentose-phosphate shunt; P:leaf senescence; P:mRNA modification; P:iron ion homeostasis; P:reactive oxygen species metabolic process; F:ATP binding; F:ribonucleoside triphosphate phosphatase activity; F:2 iron, 2 sulfur cluster binding; C:mitochondrion; C:chloroplast stroma	Nucleoside-triphosphate phosphatase	F:GO:0051537; C:GO:0043231	F:2 iron, 2 sulfur cluster binding; C:intracellular membrane-bounded organelle	317	120.624	840	142	19.62	3.32	2.56307	0.987	16.951	-2.87	-17.193	DE - Mature
GZUJ98X01_(single)_trimmed_contig_617	nitrate transporter -like	2283	0	P:polyamine catabolic process; P:iron ion transport; P:oligopeptide transport; P:phenylpropanoid metabolic process; P:auxin-activated signaling pathway; P:cellular response to iron ion starvation; P:response to nitrate; P:nitrate transmembrane transport; P:nitrate assimilation; P:cellular modified amino acid biosynthetic process; P:response to cadmium ion; F:nitrate transmembrane transporter acti…		no GO terms	no GO terms	5281	235.864	12565	1238	34.84	3.43	3.34446	0.999	32.088	-3.649	-32.295	DE - Mature
GZUJ98X01_(single)_trimmed_contig_6233	glycine max farnesylated protein gmfp5	1103	2.15e-17	P:response to chitin; P:metal ion transport; F:metal ion binding; C:plasma membrane		P:GO:0030001; F:GO:0046872	P:metal ion transport; F:metal ion binding	2492	239.885	7366	2654	42.28	15.23	1.47306	0.9	29.976	-1.779	-30.029	DE - Mature
GZUJ98X01_(single)_trimmed_contig_639	protein chloroplastic	758	1.72e-50	P:response to metal ion; P:photoperiodism, flowering; P:protein homotrimerization; F:copper ion binding; C:chloroplast		P:GO:0010038	P:response to metal ion	4148	551.582	9046	1852	75.55	15.47	2.28796	0.989	63.083	-2.594	-63.136	DE - Mature
GZUJ98X01_(single)_trimmed_contig_6622	predicted protein	3812	8.68e-77	P:carbohydrate metabolic process; P:gibberellic acid mediated signaling pathway; P:seed dormancy process; P:cellular carbohydrate metabolic process; C:mitochondrion; C:plastid		no GO terms	no GO terms	4886	133.052	12857	2421	21.35	4.02	2.40897	0.986	18.112	-2.715	-18.315	DE - Mature
GZUJ98X01_(single)_trimmed_contig_6671	valyl trna synthetase	313	4.55e-22	P:tRNA aminoacylation for protein translation; P:embryo development ending in seed dormancy; F:aminoacyl-tRNA ligase activity; F:ATP binding; C:mitochondrion; C:cytosol; C:chloroplast	Forming carbon-oxygen bonds	no GO terms	no GO terms	725	232.003	1569	403	31.73	8.15	1.96098	0.965	25.158	-2.267	-25.26	DE - Mature
GZUJ98X01_(single)_trimmed_contig_6687	e3 ubiquitin-protein ligase atl6-like	1833	8.62e-50	P:metabolic process; P:cellular process; P:defense response to other organism; F:protein binding; F:zinc ion binding		F:GO:0005515; F:GO:0008270	F:protein binding; F:zinc ion binding	5540	310.236	16472	5830	56.89	20.14	1.49811	0.901	40.63	-1.804	-40.671	DE - Mature
GZUJ98X01_(single)_trimmed_contig_6708	upf0235 protein c15orf40 homolog	1872	4.14e-23	C:nucleus; C:chloroplast		no IPS match	no IPS match	2737	147.721	8484	1066	28.69	3.6	2.99448	0.995	25.793	-3.298	-26.003	DE - Mature
GZUJ98X01_(single)_trimmed_contig_6849	uncharacterized conserved expressed	1515	8.06e-136	C:mitochondrion; C:chloroplast		no GO terms	no GO terms	5761	384.307	10039	3282	41.95	13.71	1.61344	0.903	30.877	-1.919	-30.937	DE - Mature
GZUJ98X01_(single)_trimmed_contig_6862	cat eye syndrome critical region protein	705	1.89e-37	F:copper ion binding; F:zinc ion binding; C:mitochondrion		no IPS match	no IPS match	1084	157.509	2713	276	24.36	2.48	3.2961	0.998	22.373	-3.603	-22.661	DE - Mature
GZUJ98X01_(single)_trimmed_contig_7105	protein iq-domain 14-like	1127	5.64e-37	F:protein binding; C:obsolete cell part		F:GO:0005515	F:protein binding	3598	320.195	8388	2744	47.12	15.41	1.61247	0.903	34.674	-1.918	-34.727	DE - Mature
GZUJ98X01_(single)_trimmed_contig_7372	unnamed protein product	997	4.22e-22	P:DNA-templated transcription termination		P:GO:0006353	P:DNA-templated transcription termination	3220	331.327	5999	1763	38.09	11.19	1.7672	0.964	29.057	-2.073	-29.131	DE - Mature
GZUJ98X01_(single)_trimmed_contig_7447	cysteine proteinase inhibitor cpi-3	1022	5.39e-12	P:negative regulation of peptidase activity; F:cysteine-type endopeptidase inhibitor activity; F:peptidase inhibitor activity		no GO terms	no GO terms	7147	744.48	17974	367	111.34	2.27	5.61614	1	109.576	-5.92	-109.736	DE - Mature
GZUJ98X01_(single)_trimmed_contig_74877	universal stress protein	330	1.06e-34	P:response to molecule of fungal origin; P:response to stress; C:vacuole; C:Golgi apparatus; C:plasma membrane		no IPS match	no IPS match	174	46.936	1988	695	38.14	13.33	1.51663	0.902	27.372	-1.822	-27.432	DE - Mature
GZUJ98X01_(single)_trimmed_contig_7609	hypothetical protein	364	1.63e-19	C:extracellular region		no IPS match	no IPS match	413	117.783	1172	207	20.38	3.6	2.50109	0.987	17.483	-2.807	-17.707	DE - Mature
GZUJ98X01_(single)_trimmed_contig_7613	transmembrane protein 45b-like	969	3.79e-89	C:membrane		no GO terms	no GO terms	1666	173.603	3247	988	21.21	6.45	1.71737	0.962	16.003	-2.022	-16.13	DE - Mature
GZUJ98X01_(single)_trimmed_contig_7643	octicosapeptide phox bem1p domain-containing protein	1015	1.14e-30	P:ethylene biosynthetic process; P:response to chitin; F:protein binding; C:nucleus		F:GO:0005515	F:protein binding	2587	257.914	8375	976	52.24	6.09	3.10064	0.998	47.345	-3.407	-47.467	DE - Mature
GZUJ98X01_(single)_trimmed_contig_770	monooxygenase 1	2275	6.31e-103	P:response to bacterium; F:protein binding; F:zinc ion binding; C:endoplasmic reticulum		F:GO:0005515; F:GO:0008270	F:protein binding; F:zinc ion binding	9463	427.142	23333	3310	64.93	9.21	2.81761	0.996	57.519	-3.123	-57.603	DE - Mature
GZUJ98X01_(single)_trimmed_contig_7766	calcium ion binding	1265	1.92e-60	F:calcium ion binding; C:plastid		no GO terms	no GO terms	3634	297.264	6874	2113	34.4	10.57	1.70243	0.964	25.865	-2.008	-25.943	DE - Mature
GZUJ98X01_(single)_trimmed_contig_7835	f-box protein pp2-a13-like	261	1.83e-18	P:response to wounding; P:response to sucrose; P:response to fructose; F:protein binding; F:carbohydrate binding; C:nucleus		F:GO:0005515	F:protein binding	237	87.418	1116	249	27.07	6.04	2.16407	0.969	22.199	-2.47	-22.336	DE - Mature
GZUJ98X01_(single)_trimmed_contig_7863	pentatricopeptide repeat-containing protein chloroplastic-like	293	9.38e-31	P:rRNA processing; P:tRNA metabolic process; P:chloroplast relocation; P:leaf morphogenesis; P:chloroplast-nucleus signaling pathway; P:thylakoid membrane organization; P:stomatal complex morphogenesis; P:photosystem II assembly; P:cell differentiation; P:mitochondria-nucleus signaling pathway; P:regulation of protein dephosphorylation; P:plastid transcription; P:protein targeting to chloroplast;…		no GO terms	no GO terms	551	190.785	1462	285	31.59	6.16	2.35847	0.988	26.626	-2.665	-26.759	DE - Mature
GZUJ98X01_(single)_trimmed_contig_7869	umuc-like dna repair family	1752	9.54e-67	P:macromolecule metabolic process; P:primary metabolic process; F:catalytic activity; C:mitochondrion; C:plastid		no GO terms	no GO terms	3818	226.256	7363	1596	26.61	5.77	2.20533	0.969	21.956	-2.512	-22.099	DE - Mature
GZUJ98X01_(single)_trimmed_contig_786	rwd domain-containing protein 1-like	774	3.84e-29	C:cytoplasm		no GO terms	no GO terms	1287	169.359	2796	445	22.87	3.64	2.65145	0.988	19.939	-2.957	-20.157	DE - Mature
GZUJ98X01_(single)_trimmed_contig_7957	iaa-amino acid hydrolase ilr1-like 6-like	828	1.43e-88	P:proteolysis; P:response to wounding; P:response to fungus; P:jasmonic acid biosynthetic process; P:response to jasmonic acid; P:auxin metabolic process; P:regulation of systemic acquired resistance; F:metallopeptidase activity; F:IAA-amino acid conjugate hydrolase activity; F:hippurate hydrolase activity; C:extracellular region; C:cytoplasmic vesicle	Hippurate hydrolase	P:GO:0008152; F:GO:0016787	P:metabolic process; F:hydrolase activity	1158	141.03	3067	679	23.45	5.19	2.17578	0.969	19.264	-2.481	-19.423	DE - Mature
GZUJ98X01_(single)_trimmed_contig_8204	medium-chain-fatty-acid-- ligase-like	245	6.44e-45	P:metabolic process; F:catalytic activity		P:GO:0008152; F:GO:0003824	P:metabolic process; F:catalytic activity	484	193.922	1713	485	44.26	12.53	1.82062	0.965	34.149	-2.126	-34.216	DE - Mature
GZUJ98X01_(single)_trimmed_contig_8235	f-box kelch repeat-containing f-box family protein	950	7.06e-82	F:protein binding		F:GO:0005515	F:protein binding	1932	213.316	6074	1177	40.48	7.84	2.36828	0.989	34.156	-2.673	-34.26	DE - Mature
GZUJ98X01_(single)_trimmed_contig_8244	chitinase-like protein	215	3.08e-18	F:chitin binding		F:GO:0008061	F:chitin binding	260	114.809	968	115	28.5	3.39	3.0716	0.997	25.782	-3.379	-26.002	DE - Mature
GZUJ98X01_(single)_trimmed_contig_8467	protein disulfide isomerase	329	9.73e-53	P:cell redox homeostasis		P:GO:0045454	P:cell redox homeostasis	813	240.386	1481	523	28.5	10.06	1.50233	0.901	20.371	-1.808	-20.451	DE - Mature
GZUJ98X01_(single)_trimmed_contig_8520	histone h3	835	1.92e-89	P:nucleosome assembly; P:cell population proliferation; F:DNA binding; F:protein binding; F:protein heterodimerization activity; C:nucleosome; C:nucleus; C:chromosome; C:plastid		no IPS match	no IPS match	3883	482.257	9442	1150	71.59	8.72	3.03736	0.998	64.578	-3.343	-64.665	DE - Mature
GZUJ98X01_(single)_trimmed_contig_8540	kda class i heat shock	824	7.95e-16	P:response to stress; P:response to oxidative stress; P:response to high light intensity; P:response to hydrogen peroxide; C:cytoplasm		no IPS match	no IPS match	1256	154.311	4684	1080	35.99	8.3	2.11641	0.97	29.295	-2.423	-29.395	DE - Mature
GZUJ98X01_(single)_trimmed_contig_8658	f-box kelch-repeat protein	580	2.14e-22	P:biological_process; F:molecular_function		no IPS match	no IPS match	1091	200.378	2113	413	23.06	4.51	2.35419	0.987	19.43	-2.661	-19.612	DE - Mature
GZUJ98X01_(single)_trimmed_contig_8780	receptor protein	3501	0	P:MAPK cascade; P:obsolete activation of MAPKK activity; P:response to molecule of bacterial origin; P:protein phosphorylation; P:N-terminal protein myristoylation; P:protein targeting to membrane; P:response to oxidative stress; P:signal transduction; P:transmembrane receptor protein tyrosine kinase signaling pathway; P:systemic acquired resistance; P:seed germination; P:positive regulation of f…		no IPS match	no IPS match	5716	169.251	11502	2617	20.8	4.73	2.13667	0.968	16.982	-2.442	-17.157	DE - Mature
GZUJ98X01_(single)_trimmed_contig_9122	50s ribosomal protein l9	203	1.64e-15	P:translation; P:isopentenyl diphosphate biosynthetic process, methylerythritol 4-phosphate pathway; P:ribosome biogenesis; F:RNA binding; F:structural constituent of ribosome; F:rRNA binding; C:plastid large ribosomal subunit; C:intracellular anatomical structure; C:ribosome; C:chloroplast; C:plastid; C:chloroplast stroma; C:chloroplast envelope; C:ribonucleoprotein complex		no GO terms	no GO terms	172	88.542	1315	190	41.01	5.93	2.78987	0.995	36.241	-3.097	-36.373	DE - Mature
GZUJ98X01_(single)_trimmed_contig_9130	aaa family atpase cdc48 subfamily	3740	0	F:ATP binding; F:ribonucleoside triphosphate phosphatase activity	Nucleoside-triphosphate phosphatase	F:GO:0000166; F:GO:0005524; F:GO:0017111	F:nucleotide binding; F:ATP binding; F:ribonucleoside triphosphate phosphatase activity	7352	205.862	15065	5302	25.5	8.97	1.50732	0.9	18.253	-1.813	-18.343	DE - Mature
GZUJ98X01_(single)_trimmed_contig_9212	glutaredoxin	375	8.93e-29	P:cell redox homeostasis; P:anther development; F:arsenate reductase (glutaredoxin) activity; F:electron transfer activity; F:protein-disulfide reductase activity; C:cellular_component		no IPS match	no IPS match	696	186.213	1390	211	23.47	3.56	2.72087	0.994	20.599	-3.026	-20.82	DE - Mature
GZUJ98X01_(single)_trimmed_contig_9223	e3 ubiquitin-protein ligase rha1b-like	874	4.27e-32	F:protein binding; F:zinc ion binding		F:GO:0005515; F:GO:0008270	F:protein binding; F:zinc ion binding	5230	589.78	18564	1543	134.46	11.18	3.58818	1	125.512	-3.895	-125.573	DE - Mature
GZUJ98X01_(single)_trimmed_contig_9588	phytoene desaturase	230	3.87e-21	P:regulation of proton transport; P:carotenoid biosynthetic process; P:carotene biosynthetic process; P:protein autophosphorylation; P:obsolete oxidation-reduction process; F:phytoene dehydrogenase activity; F:oxidoreductase activity; F:oxidoreductase activity, acting on paired donors, with incorporation or reduction of molecular oxygen; C:chloroplast; C:chromoplast; C:chloroplast thylakoid; C:pl…		no IPS match	no IPS match	373	158.117	952	161	26.2	4.43	2.56419	0.988	22.635	-2.87	-22.816	DE - Mature
GZUJ98X01_(single)_trimmed_contig_9778	pi-phospholipase c plc4	1080	1.73e-86	P:lipid metabolic process; P:intracellular signal transduction; F:phosphatidylinositol phospholipase C activity; F:calcium ion binding	Phosphoinositide phospholipase C	P:GO:0006629; P:GO:0035556; F:GO:0004435; F:GO:0005509; F:GO:0008081	P:lipid metabolic process; P:intracellular signal transduction; F:phosphatidylinositol phospholipase C activity; F:calcium ion binding; F:phosphoric diester hydrolase activity	1540	150.178	3500	207	20.52	1.21	4.08395	0.997	19.548	-4.386	-20.034	DE - Mature
GZUJ98X01_(single)_trimmed_contig_9962	protein	911	7.05e-70	P:biological_process; F:molecular_function; C:mitochondrion; C:endoplasmic reticulum		no GO terms	no GO terms	864	95.674	3770	963	26.2	6.69	1.96949	0.964	20.8	-2.275	-20.924	DE - Mature
GZUJ98X01_(single)_trimmed_contig_9988	sucrose-phosphate synthase	431	2.96e-77	P:sucrose metabolic process; P:biosynthetic process; F:transferase activity; F:glycosyltransferase activity; F:sucrose-phosphate synthase activity; C:nucleus; C:cytosol; C:plasma membrane; C:plasmodesma		no GO terms	no GO terms	1832	429.285	4456	1385	65.45	20.34	1.68607	0.903	49.03	-1.992	-49.07	DE - Mature
GZUJ98X01_(single)_trimmed_contig_9991	phosphatidylinositol-specific phospholipase c	368	5.2e-18	P:lipid metabolic process; P:intracellular signal transduction; F:phosphatidylinositol phospholipase C activity	Phosphoinositide phospholipase C	P:GO:0006629; P:GO:0035556; F:GO:0004435; F:GO:0008081	P:lipid metabolic process; P:intracellular signal transduction; F:phosphatidylinositol phospholipase C activity; F:phosphoric diester hydrolase activity	521	150.723	1204	112	20.71	1.93	3.42365	0.997	19.167	-3.732	-19.527	DE - Mature
GZUJ98X01_(single)_trimmed_contig_1005	magnesium-protoporphyrin ix monomethyl ester	218	4.39e-33	P:rRNA processing; P:unsaturated fatty acid biosynthetic process; P:response to light stimulus; P:chloroplast organization; P:thylakoid membrane organization; P:photosystem II assembly; P:chlorophyll biosynthetic process; P:regulation of lipid metabolic process; P:isopentenyl diphosphate biosynthetic process, methylerythritol 4-phosphate pathway; P:cysteine biosynthetic process; P:oxylipin biosyn…	Magnesium-protoporphyrin IX monomethyl ester (oxidative) cyclase	P:GO:0055114; F:GO:0016491; F:GO:0046872	P:obsolete oxidation-reduction process; F:oxidoreductase activity; F:metal ion binding	6543	2955.82	22296	6823	647.47	198.14	1.70829	0.966	487.535	-2.014	-487.539	DE - Mature
GZUJ98X01_(single)_trimmed_contig_1019	stem-specific protein	2815	8.54e-111	P:response to hypoxia; P:systemic acquired resistance, salicylic acid mediated signaling pathway; P:regulation of hydrogen peroxide metabolic process; F:protein binding; C:nucleus; C:cytosol; C:plasma membrane; C:plasmodesma		no GO terms	no GO terms	19319	708.776	38699	12746	87.03	28.66	1.60247	0.904	63.888	-1.908	-63.916	DE - Mature
GZUJ98X01_(single)_trimmed_contig_10280	af239218_1 plastid-specific ribosomal protein 3 precursor	245	7.82e-22	P:translation; F:structural constituent of ribosome; F:rRNA binding; C:ribosome; C:chloroplast		no IPS match	no IPS match	3810	1494.48	1648	7644	42.58	197.52	-2.21375	0.904	117.274	1.908	117.29	DE - Young
GZUJ98X01_(single)_trimmed_contig_102	ribulose- -bisphosphate carboxylase oxygenase small subunit	1200	1.15e-59	P:photorespiration; P:reductive pentose-phosphate cycle; P:obsolete oxidation-reduction process; F:monooxygenase activity; F:ribulose-bisphosphate carboxylase activity; C:chloroplast	Ribulose-bisphosphate carboxylase	no GO terms	no GO terms	433873	37072.8	2105173	653172	11105.9	3445.83	1.68841	0.904	8324.4	-1.994	-8324.4	DE - Mature
GZUJ98X01_(single)_trimmed_contig_10322	dehydration-responsive element binding protein	519	4.65e-41	P:regulation of DNA-templated transcription; F:DNA binding; F:DNA-binding transcription factor activity; C:nucleus		P:GO:0006355; F:GO:0003677; F:GO:0003700	P:regulation of DNA-templated transcription; F:DNA binding; F:DNA-binding transcription factor activity	3500	661.829	7943	1881	96.89	22.94	2.07848	0.971	78.382	-2.384	-78.419	DE - Mature
GZUJ98X01_(single)_trimmed_contig_103319	xyloglucan endotransglycosylase-related protein xtr-7	254	1.05e-45	P:cellular glucan metabolic process; F:hydrolase activity, hydrolyzing O-glycosyl compounds; F:xyloglucan:xyloglucosyl transferase activity; C:cell wall; C:apoplast	Xyloglucan:xyloglucosyl transferase	P:GO:0005975; F:GO:0004553	P:carbohydrate metabolic process; F:hydrolase activity, hydrolyzing O-glycosyl compounds	33	11.736	1662	9032	41.42	225.11	-2.44223	0.966	140.773	2.136	140.79	DE - Young
GZUJ98X01_(single)_trimmed_contig_10343	histone h2a	628	2.02e-39	P:RNA methylation; P:nucleosome assembly; P:cell population proliferation; F:DNA binding; F:protein heterodimerization activity; C:nucleosome; C:nucleolus		P:GO:0006334; F:GO:0003677; F:GO:0046982; C:GO:0000786; C:GO:0005634	P:nucleosome assembly; F:DNA binding; F:protein heterodimerization activity; C:nucleosome; C:nucleus	28235	4456.95	16267	95131	163.98	958.98	-2.54798	0.966	612.19	2.242	612.194	DE - Young
GZUJ98X01_(single)_trimmed_contig_10353	gamma carbonic anhydrase	425	2.98e-61	P:pentose-phosphate shunt; P:ubiquitin-dependent protein catabolic process; P:response to salt stress; P:photorespiration; P:starch biosynthetic process; P:second-messenger-mediated signaling; P:response to cadmium ion; P:response to misfolded protein; P:proteasome core complex assembly; F:carbonate dehydratase activity; F:transferase activity; C:mitochondrial respiratory chain complex I	Carbonic anhydrase	no GO terms	no GO terms	2430	560.16	1851	8326	27.57	124.02	-2.1694	0.903	72.803	1.863	72.827	DE - Young
GZUJ98X01_(single)_trimmed_contig_10555	udp-glycosyltransferase 75d1-like	307	1.42e-39	P:metabolic process; F:hexosyltransferase activity		P:GO:0008152; F:GO:0016758	P:metabolic process; F:hexosyltransferase activity	2576	840.466	9189	2911	189.49	60.03	1.65837	0.904	141.028	-1.964	-141.042	DE - Mature
GZUJ98X01_(single)_trimmed_contig_1058	ribulose-phosphate 3- chloroplastic-like	417	2.84e-48	P:carbohydrate metabolic process; F:racemase and epimerase activity, acting on carbohydrates and derivatives		P:GO:0005975; P:GO:0008152; F:GO:0003824; F:GO:0016857	P:carbohydrate metabolic process; P:metabolic process; F:catalytic activity; F:racemase and epimerase activity, acting on carbohydrates and derivatives	11633	2804.57	26283	9036	399.01	137.18	1.54035	0.903	288.249	-1.846	-288.255	DE - Mature
GZUJ98X01_(single)_trimmed_contig_10616	histone h2a	856	3.68e-42	P:RNA methylation; P:nucleosome assembly; P:cell population proliferation; F:DNA binding; F:protein heterodimerization activity; C:nucleosome; C:nucleolus		P:GO:0006334; F:GO:0003677; F:GO:0046982; C:GO:0000786; C:GO:0005634	P:nucleosome assembly; F:DNA binding; F:protein heterodimerization activity; C:nucleosome; C:nucleus	9663	1137.48	5164	24299	38.19	179.71	-2.2344	0.904	107.253	1.928	107.27	DE - Young
GZUJ98X01_(single)_trimmed_contig_1097	glyceraldehyde-3-phosphate dehydrogenase b subunit	337	2.75e-51	P:obsolete oxidation-reduction process; F:oxidoreductase activity, acting on the aldehyde or oxo group of donors, NAD or NADP as acceptor		P:GO:0055114; F:GO:0016620	P:obsolete oxidation-reduction process; F:oxidoreductase activity, acting on the aldehyde or oxo group of donors, NAD or NADP as acceptor	11995	3625.99	32484	12114	610.22	227.57	1.42302	0.901	426.441	-1.729	-426.444	DE - Mature
GZUJ98X01_(single)_trimmed_contig_11001	late embryogenesis-like protein	261	4.08e-18	P:cell morphogenesis; P:gluconeogenesis; P:glycolytic process; P:response to desiccation; P:response to salt stress; P:embryo development ending in seed dormancy; P:cell growth; P:cysteine biosynthetic process; P:response to cadmium ion; P:Golgi vesicle transport; C:Golgi apparatus; C:cytosol; C:plasma membrane; C:plasmodesma		no GO terms	no GO terms	2482	962.387	1500	7991	36.38	193.82	-2.4135	0.966	120.491	2.107	120.509	DE - Young
GZUJ98X01_(single)_trimmed_contig_1102	lipid transfer	845	1.68e-31	P:lipid transport; C:anchored component of plasma membrane		no IPS match	no IPS match	22851	2767.5	11551	49714	86.54	372.45	-2.10561	0.901	214.897	1.8	214.904	DE - Young
GZUJ98X01_(single)_trimmed_contig_11084	phosphoglycerate kinase	443	2.45e-71	P:glycolytic process; P:phosphorylation; P:response to endoplasmic reticulum stress; P:response to arsenic-containing substance; P:response to cadmium ion; F:phosphoglycerate kinase activity; C:nucleus; C:vacuolar membrane; C:Golgi apparatus; C:cytosol; C:plasma membrane; C:plasmodesma; C:chloroplast stroma; C:apoplast	Phosphoglycerate kinase	P:GO:0006096; F:GO:0004618	P:glycolytic process; F:phosphoglycerate kinase activity	17822	3991.72	12139	46902	173.47	670.25	-1.95001	0.901	368.966	1.644	368.97	DE - Young
GZUJ98X01_(single)_trimmed_contig_1109	uncharacterized isochorismatase family protein pnca	801	1.12e-58	P:metabolic process; F:catalytic activity		P:GO:0008152; F:GO:0003824	P:metabolic process; F:catalytic activity	5761	723.33	10439	3145	82.5	24.86	1.73057	0.965	62.441	-2.037	-62.474	DE - Mature
GZUJ98X01_(single)_trimmed_contig_1131	plasma membrane h+atpase	1784	0	P:obsolete ATP catabolic process; P:ATP biosynthetic process; P:cation transport; F:nucleotide binding; F:ATPase-coupled cation transmembrane transporter activity; F:metal ion binding; C:integral component of membrane		P:GO:0006200; P:GO:0006754; P:GO:0006812; F:GO:0000166; F:GO:0016887; F:GO:0019829; F:GO:0046872; C:GO:0016021	P:obsolete ATP catabolic process; P:ATP biosynthetic process; P:cation transport; F:nucleotide binding; F:ATP hydrolysis activity; F:ATPase-coupled cation transmembrane transporter activity; F:metal ion binding; C:integral component of membrane	23234	1338.97	39490	16242	140.13	57.64	1.28162	0.9	93.576	-1.588	-93.59	DE - Mature
GZUJ98X01_(single)_trimmed_contig_11430	caffeic acid o-methyltransferase	1149	1.54e-133	P:metabolic process; F:O-methyltransferase activity; F:protein dimerization activity	Transferring one-carbon groups	F:GO:0008168; F:GO:0008171; F:GO:0046983	F:methyltransferase activity; F:O-methyltransferase activity; F:protein dimerization activity	21528	1916.31	8062	49151	44.42	270.81	-2.608	0.966	174.766	2.302	174.781	DE - Young
GZUJ98X01_(single)_trimmed_contig_1156	eukaryotic elongation factor 1a	344	6.27e-59	F:GTP binding		F:GO:0005525	F:GTP binding	2723	776.427	2093	8442	38.52	155.36	-2.01194	0.901	87.217	1.706	87.233	DE - Young
GZUJ98X01_(single)_trimmed_contig_11930	af469064_1polyamine oxidase	290	5.82e-12	P:obsolete oxidation-reduction process; F:oxidoreductase activity		P:GO:0055114; F:GO:0016491	P:obsolete oxidation-reduction process; F:oxidoreductase activity	14357	4706.12	3636	52657	79.37	1149.49	-3.85626	0.999	851.075	3.55	851.082	DE - Young
GZUJ98X01_(single)_trimmed_contig_1224	histone h3	397	8.76e-45	P:nucleosome assembly; F:DNA binding; F:protein heterodimerization activity; C:nucleosome		P:GO:0006334; F:GO:0003677; F:GO:0046982; C:GO:0000786	P:nucleosome assembly; F:DNA binding; F:protein heterodimerization activity; C:nucleosome	23931	6070.06	8693	66735	138.62	1064.17	-2.94052	0.989	722.719	2.635	722.723	DE - Young
GZUJ98X01_(single)_trimmed_contig_1225	histone h3-like	286	3.05e-21	P:nucleosome assembly; F:DNA binding; F:protein heterodimerization activity; C:nucleosome; C:nucleus		no IPS match	no IPS match	15380	5264.85	11169	47878	247.23	1059.79	-2.09985	0.901	610.485	1.794	610.488	DE - Young
GZUJ98X01_(single)_trimmed_contig_1226	histone h3	362	1.28e-40	P:nucleosome assembly; F:DNA binding; F:protein heterodimerization activity; C:nucleosome		P:GO:0006334; F:GO:0003677; F:GO:0046982; C:GO:0000786	P:nucleosome assembly; F:DNA binding; F:protein heterodimerization activity; C:nucleosome	25802	7204.01	14679	56878	256.71	994.68	-1.95409	0.901	548.298	1.648	548.301	DE - Young
GZUJ98X01_(single)_trimmed_contig_1227	histone h3	331	2.89e-32	P:nucleosome assembly; F:DNA binding; F:protein heterodimerization activity; C:nucleosome		P:GO:0006334; F:GO:0003677; F:GO:0046982; C:GO:0000786	P:nucleosome assembly; F:DNA binding; F:protein heterodimerization activity; C:nucleosome	21235	6546.18	12378	68767	236.74	1315.22	-2.47393	0.966	827.757	2.168	827.76	DE - Young
GZUJ98X01_(single)_trimmed_contig_1230	histone h1	1536	1.04e-21	P:nucleosome assembly; F:DNA binding; C:nucleosome; C:nucleus		P:GO:0006334; F:GO:0003677; C:GO:0000786; C:GO:0005634	P:nucleosome assembly; F:DNA binding; C:nucleosome; C:nucleus	84403	5528.6	49938	196215	205.82	808.7	-1.97422	0.901	448.673	1.668	448.676	DE - Young
GZUJ98X01_(single)_trimmed_contig_1252	s-adenosylmethionine synthase-like isoform 2	296	5.45e-47	P:S-adenosylmethionine biosynthetic process; F:methionine adenosyltransferase activity; F:ATP binding	Methionine adenosyltransferase	P:GO:0006556; F:GO:0004478; F:GO:0005524	P:S-adenosylmethionine biosynthetic process; F:methionine adenosyltransferase activity; F:ATP binding	4440	1512.37	11891	1794	254.32	38.37	2.72859	0.996	223.437	-3.035	-223.458	DE - Mature
GZUJ98X01_(single)_trimmed_contig_1261	hypothetical protein VITISV_011279	1406	4.22e-35	P:response to oxidative stress; P:response to cadmium ion; C:nuclear speck		no IPS match	no IPS match	23326	1759.95	44959	17890	202.43	80.55	1.32947	0.9	137.369	-1.635	-137.379	DE - Mature
GZUJ98X01_(single)_trimmed_contig_126	adenylyl-sulfate reductase	1596	0	P:sulfate assimilation; P:indoleacetic acid biosynthetic process; P:cysteine biosynthetic process; P:sulfate reduction; P:glucosinolate biosynthetic process; P:cell redox homeostasis; F:phosphoadenylyl-sulfate reductase (thioredoxin) activity; F:adenylyl-sulfate reductase activity; F:adenylyl-sulfate reductase (glutathione) activity; C:chloroplast thylakoid; C:chloroplast stroma	Adenylyl-sulfate reductase (glutathione); Adenylyl-sulfate reductase; Phosphoadenylyl-sulfate reductase (thioredoxin)	P:GO:0008152; P:GO:0019419; P:GO:0045454; P:GO:0055114; F:GO:0003824; F:GO:0016671	P:metabolic process; P:sulfate reduction; P:cell redox homeostasis; P:obsolete oxidation-reduction process; F:catalytic activity; F:oxidoreductase activity, acting on a sulfur group of donors, disulfide as acceptor	30483	1955.88	75627	22578	299.98	89.56	1.74394	0.966	227.696	-2.05	-227.705	DE - Mature
GZUJ98X01_(single)_trimmed_contig_1279	inorganic pyrophosphatase 2-like	1409	6.23e-87	P:metabolic process; F:phosphatase activity		P:GO:0008152; F:GO:0016791	P:metabolic process; F:phosphatase activity	87533	6412.59	189441	38777	851.16	174.23	2.28844	0.989	710.727	-2.594	-710.732	DE - Mature
GZUJ98X01_(single)_trimmed_contig_12835	b- -glucanase	960	0	P:carbohydrate metabolic process; F:hydrolase activity, hydrolyzing O-glycosyl compounds		P:GO:0005975; F:GO:0004553	P:carbohydrate metabolic process; F:hydrolase activity, hydrolyzing O-glycosyl compounds	7982	861.356	4264	17666	28.12	116.5	-2.05066	0.901	66.165	1.745	66.188	DE - Young
GZUJ98X01_(single)_trimmed_contig_1295	fructose-bisphosphate aldolase	2374	8.72e-178	P:maltose metabolic process; P:response to hypoxia; P:glycolytic process; P:pentose-phosphate shunt; P:anthocyanin-containing compound biosynthetic process; P:leaf morphogenesis; P:mRNA modification; P:starch biosynthetic process; P:cell differentiation; P:positive regulation of DNA-templated transcription; F:fructose-bisphosphate aldolase activity; C:chloroplast	Fructose-bisphosphate aldolase	no IPS match	no IPS match	42662	1850.39	89235	32629	237.96	87.01	1.45147	0.901	167.693	-1.757	-167.702	DE - Mature
GZUJ98X01_(single)_trimmed_contig_13011	gdsl esterase lipase exl3	1336	2.92e-143	P:lipid metabolic process; P:glucosinolate biosynthetic process; P:sexual reproduction; F:lipase activity; F:acyltransferase activity; F:carboxylic ester hydrolase activity; C:extracellular region	Carboxylesterase; Acting on ester bonds	P:GO:0006629; F:GO:0016298; F:GO:0016787; F:GO:0016788	P:lipid metabolic process; F:lipase activity; F:hydrolase activity; F:hydrolase activity, acting on ester bonds	17837	1377.58	8105	35427	38.41	167.87	-2.12779	0.903	97.457	1.822	97.475	DE - Young
GZUJ98X01_(single)_trimmed_contig_13017	phosphofructokinase family protein	455	1.99e-94	P:fructose 6-phosphate metabolic process; P:glycolytic process; P:root epidermal cell differentiation; P:phosphorylation; F:6-phosphofructokinase activity; F:ATP binding; F:diphosphate-fructose-6-phosphate 1-phosphotransferase activity; C:plasma membrane; C:6-phosphofructokinase complex	Diphosphate--fructose-6-phosphate 1-phosphotransferase; 6-phosphofructokinase	P:GO:0006002; P:GO:0006096; F:GO:0003872; C:GO:0005945	P:fructose 6-phosphate metabolic process; P:glycolytic process; F:6-phosphofructokinase activity; C:6-phosphofructokinase complex	3004	661.138	6588	2545	91.66	35.41	1.37214	0.9	63.063	-1.678	-63.085	DE - Mature
GZUJ98X01_(single)_trimmed_contig_13022	histone 3	207	4.93e-19	P:nucleosome assembly; F:DNA binding; F:protein heterodimerization activity; C:nucleosome; C:nucleus		no GO terms	no GO terms	6279	3136.41	4762	19948	145.64	610.07	-2.06657	0.901	348.105	1.761	348.11	DE - Young
GZUJ98X01_(single)_trimmed_contig_13023	histone h3	208	4.53e-19	P:nucleosome assembly; F:DNA binding; F:protein heterodimerization activity; C:nucleosome; C:nucleus		no GO terms	no GO terms	4830	2390.85	2187	17831	66.56	542.7	-3.02743	0.989	372.701	2.721	372.711	DE - Young
GZUJ98X01_(single)_trimmed_contig_13049	protein	546	5.18e-57	P:lipid metabolic process; F:hydrolase activity, acting on ester bonds		P:GO:0006629; F:GO:0016787; F:GO:0016788	P:lipid metabolic process; F:hydrolase activity; F:hydrolase activity, acting on ester bonds	7444	1381.76	2752	16933	31.91	196.33	-2.6212	0.971	126.998	2.315	127.019	DE - Young
GZUJ98X01_(single)_trimmed_contig_13333	sucrose transporter	247	1.13e-28	P:sucrose transport; P:transmembrane transport; F:sucrose transmembrane transporter activity; F:transmembrane transporter activity; C:integral component of plasma membrane; C:integral component of membrane		no GO terms	no GO terms	1952	801.247	6381	1849	163.55	47.39	1.78708	0.966	125.3	-2.093	-125.317	DE - Mature
GZUJ98X01_(single)_trimmed_contig_1347	senescence-associated protein	574	3.87e-30	P:tryptophan catabolic process; P:response to oxidative stress; P:aging; P:response to wounding; P:indoleacetic acid biosynthetic process; P:response to sucrose; P:response to fructose; P:response to jasmonic acid; F:thiosulfate sulfurtransferase activity; F:protein binding; C:chloroplast	Thiosulfate sulfurtransferase	no GO terms	no GO terms	12667	2255.59	31744	12404	350.1	136.8	1.3557	0.901	239.611	-1.662	-239.616	DE - Mature
GZUJ98X01_(single)_trimmed_contig_13495	f-box kelch-repeat protein	1256	1.76e-91	P:negative regulation of cytokinin-activated signaling pathway; F:protein binding; C:SCF ubiquitin ligase complex		F:GO:0005515	F:protein binding	2888	237.21	12096	4789	60.97	24.14	1.33667	0.9	41.471	-1.643	-41.504	DE - Mature
GZUJ98X01_(single)_trimmed_contig_13510	elongation factor ts	243	2.24e-41	P:translational elongation; P:embryo development ending in seed dormancy; P:chloroplast relocation; P:thylakoid membrane organization; P:carotenoid biosynthetic process; P:isopentenyl diphosphate biosynthetic process, methylerythritol 4-phosphate pathway; P:ncRNA metabolic process; P:hydrogen peroxide catabolic process; P:response to cadmium ion; F:translation elongation factor activity; C:chloro…		P:GO:0006414; F:GO:0003746; C:GO:0005622	P:translational elongation; F:translation elongation factor activity; C:intracellular anatomical structure	5576	2328.32	3468	17247	90.35	449.32	-2.31415	0.966	273.308	2.008	273.315	DE - Young
GZUJ98X01_(single)_trimmed_contig_1423	hypothetical protein OsJ_14451	773	6.17e-11	P:protein phosphorylation; F:nucleotide binding; F:protein kinase activity; F:protein serine/threonine kinase activity; F:ATP binding; F:transferase activity, transferring phosphorus-containing groups		no IPS match	no IPS match	502	67.508	238792	3587	1955.64	29.38	6.05666	1	1933.24	-6.363	-1933.25	DE - Mature
GZUJ98X01_(single)_trimmed_contig_14450	kinesin like protein	677	8.4e-27	P:pentose-phosphate shunt; P:leaf senescence; P:mRNA modification; P:iron ion homeostasis; P:reactive oxygen species metabolic process; F:2 iron, 2 sulfur cluster binding; C:mitochondrion; C:chloroplast stroma		F:GO:0051537; C:GO:0043231	F:2 iron, 2 sulfur cluster binding; C:intracellular membrane-bounded organelle	7133	1080.62	2559	12710	23.93	118.85	-2.31225	0.965	72.263	2.006	72.291	DE - Young
GZUJ98X01_(single)_trimmed_contig_1487	conserved hypothetical protein	2099	0	C:mitochondrion		no GO terms	no GO terms	8729	427.541	21061	8306	63.52	25.05	1.3424	0.9	43.287	-1.648	-43.318	DE - Mature
GZUJ98X01_(single)_trimmed_contig_14968	zinc finger	835	2.08e-47	F:hydrolase activity; C:intracellular membrane-bounded organelle		no GO terms	no GO terms	13974	1706.77	5879	28556	44.57	216.5	-2.28022	0.904	130.652	1.974	130.666	DE - Young
GZUJ98X01_(single)_trimmed_contig_1497	chaperone protein chloroplastic-like	2153	0	F:nucleotide binding; F:protein binding; F:ATP binding; F:ribonucleoside triphosphate phosphatase activity	Nucleoside-triphosphate phosphatase	F:GO:0000166; F:GO:0005515; F:GO:0005524; F:GO:0017111	F:nucleotide binding; F:protein binding; F:ATP binding; F:ribonucleoside triphosphate phosphatase activity	47320	2264.54	104638	33110	307.68	97.36	1.66003	0.904	229.084	-1.966	-229.093	DE - Mature
GZUJ98X01_(single)_trimmed_contig_15098	protein	220	7.88e-23	F:DNA binding		no GO terms	no GO terms	1588	731.623	870	4204	25.03	120.97	-2.27292	0.904	72.874	1.967	72.901	DE - Young
GZUJ98X01_(single)_trimmed_contig_1522	lipoxygenase	1941	0	P:obsolete oxidation-reduction process; F:iron ion binding; F:linoleate 13S-lipoxygenase activity	Linoleate 13S-lipoxygenase	P:GO:0055114; F:GO:0005506; F:GO:0016165; F:GO:0016702; F:GO:0046872	P:obsolete oxidation-reduction process; F:iron ion binding; F:linoleate 13S-lipoxygenase activity; F:oxidoreductase activity, acting on single donors with incorporation of molecular oxygen, incorporation of two atoms of oxygen; F:metal ion binding	230121	11982.6	108766	545140	354.74	1777.99	-2.32541	0.966	1084.28	2.019	1084.28	DE - Young
GZUJ98X01_(single)_trimmed_contig_1523	probable linoleate 9s-lipoxygenase 5-like	262	3.95e-29	P:obsolete oxidation-reduction process; F:iron ion binding; F:protein binding; F:linoleate 13S-lipoxygenase activity	Linoleate 13S-lipoxygenase	P:GO:0055114; F:GO:0005506; F:GO:0005515; F:GO:0016165; F:GO:0016702; F:GO:0046872	P:obsolete oxidation-reduction process; F:iron ion binding; F:protein binding; F:linoleate 13S-lipoxygenase activity; F:oxidoreductase activity, acting on single donors with incorporation of molecular oxygen, incorporation of two atoms of oxygen; F:metal ion binding	5298	1941.64	2443	10833	59.03	261.76	-2.14872	0.903	152.817	1.843	152.828	DE - Young
GZUJ98X01_(single)_trimmed_contig_1538	rhomboid family protein	1738	2.03e-77	P:proteolysis; F:serine-type endopeptidase activity; C:integral component of membrane	Acting on peptide bonds (peptidases)	P:GO:0006508; F:GO:0004252; C:GO:0016021	P:proteolysis; F:serine-type endopeptidase activity; C:integral component of membrane	21745	1281.84	44215	13833	161.05	50.39	1.6763	0.904	120.379	-1.982	-120.395	DE - Mature
GZUJ98X01_(single)_trimmed_contig_15394	thaumatin-like protein	1121	2.82e-108	P:microtubule cytoskeleton organization; P:cytokinesis by cell plate formation; P:cell population proliferation; P:regulation of meristem growth; P:response to other organism; C:extracellular region; C:plasmodesma; C:membrane		no GO terms	no GO terms	14856	1345.67	8234	52246	46.5	295.05	-2.66566	0.971	192.307	2.36	192.322	DE - Young
GZUJ98X01_(single)_trimmed_contig_15486	histone h1 subtype 7	369	1.02e-11	P:nucleosome assembly; F:DNA binding; C:nucleosome; C:nucleus		P:GO:0006334; F:GO:0003677; C:GO:0000786; C:GO:0005634	P:nucleosome assembly; F:DNA binding; C:nucleosome; C:nucleus	9254	2616.4	3624	33931	62.17	582.13	-3.22705	0.99	409.009	2.921	409.02	DE - Young
GZUJ98X01_(single)_trimmed_contig_1562	chloroplast thioredoxin m-type	530	1.76e-54	P:glycerol ether metabolic process; P:cell redox homeostasis; F:protein-disulfide reductase activity		P:GO:0006662; P:GO:0045454; F:GO:0015035	P:glycerol ether metabolic process; P:cell redox homeostasis; F:protein-disulfide reductase activity	22930	4316.59	2126	46798	25.39	558.98	-4.46046	1	427.081	4.154	427.101	DE - Young
GZUJ98X01_(single)_trimmed_contig_1572	magnesium chelatase h subunit	941	2.82e-166	P:biosynthetic process		P:GO:0009058	P:biosynthetic process	14555	1559.36	31214	6943	209.99	46.71	2.16852	0.971	172.332	-2.474	-172.35	DE - Mature
GZUJ98X01_(single)_trimmed_contig_1598	probable histone -like	557	9.32e-39	P:nucleosome assembly; F:DNA binding; F:protein heterodimerization activity; C:nucleosome; C:nucleus		P:GO:0006334; F:GO:0003677; F:GO:0046982; C:GO:0000786; C:GO:0005634	P:nucleosome assembly; F:DNA binding; F:protein heterodimerization activity; C:nucleosome; C:nucleus	14421	2651.11	11642	54345	132.32	617.66	-2.22278	0.904	367.582	1.917	367.587	DE - Young
GZUJ98X01_(single)_trimmed_contig_1630	chaperonin cpn60- mitochondrial-like isoform 1	2327	0	P:protein refolding; F:ATP binding; C:cytoplasm		P:GO:0019538; P:GO:0042026; F:GO:0005524; C:GO:0005737	P:protein metabolic process; P:protein refolding; F:ATP binding; C:cytoplasm	55453	2471.2	31015	115130	84.38	313.21	-1.89216	0.9	169.107	1.586	169.114	DE - Young
GZUJ98X01_(single)_trimmed_contig_1631	polyadenylate-binding protein 2-like	724	2.68e-103	F:nucleotide binding; F:RNA binding		F:GO:0000166; F:GO:0003676; F:GO:0003723	F:nucleotide binding; F:nucleic acid binding; F:RNA binding	42803	6084.59	17671	93065	154.51	813.76	-2.3969	0.966	504.107	2.091	504.111	DE - Young
GZUJ98X01_(single)_trimmed_contig_16393	bzip transcription factor	465	8.16e-29	P:regulation of DNA-templated transcription; F:DNA-binding transcription factor activity; F:sequence-specific DNA binding		P:GO:0006355; F:GO:0003700; F:GO:0043565	P:regulation of DNA-templated transcription; F:DNA-binding transcription factor activity; F:sequence-specific DNA binding	1846	399.675	4965	2058	67.59	28.02	1.27035	0.9	44.962	-1.576	-44.99	DE - Mature
GZUJ98X01_(single)_trimmed_contig_163	chloroplast photosystem ii 10 kda protein	1000	1.22e-53	P:response to blue light; P:response to high light intensity; P:response to sucrose; P:response to red light; P:regulation of proton transport; P:response to far red light; P:photosystem II oxygen evolving complex assembly; P:cysteine biosynthetic process; C:chloroplast thylakoid membrane; C:photosystem II oxygen evolving complex		P:GO:0015979; C:GO:0009523; C:GO:0009654; C:GO:0042651	P:photosynthesis; C:photosystem II; C:photosystem II oxygen evolving complex; C:thylakoid membrane	452574	46091.3	936318	321345	5927.5	2034.32	1.54288	0.903	4284.92	-1.849	-4284.92	DE - Mature
GZUJ98X01_(single)_trimmed_contig_167	actin	431	2.33e-74	P:glucose catabolic process; P:gluconeogenesis; P:cytoskeleton organization; P:seed germination; P:proteasomal protein catabolic process; P:regulation of protein localization; P:root hair elongation; P:cell division; F:structural constituent of cytoskeleton; F:ATP binding; C:cell wall; C:nucleolus; C:mitochondrion; C:cytosol; C:cytoskeleton; C:plasma membrane; C:plasmodesma; C:chloroplast stroma;…		no GO terms	no GO terms	19869	4594.23	38840	13978	570.49	205.31	1.4744	0.901	404.697	-1.78	-404.701	DE - Mature
GZUJ98X01_(single)_trimmed_contig_1685	atp synthase	245	4e-34	P:proton motive force-driven ATP synthesis; F:proton-transporting ATP synthase activity, rotational mechanism; F:proton-transporting ATPase activity, rotational mechanism; C:proton-transporting ATP synthase complex, catalytic core F(1)		P:GO:0015986; F:GO:0046933; F:GO:0046961; C:GO:0045261	P:proton motive force-driven ATP synthesis; F:proton-transporting ATP synthase activity, rotational mechanism; F:proton-transporting ATPase activity, rotational mechanism; C:proton-transporting ATP synthase complex, catalytic core F(1)	1968	781.098	5019	1746	129.69	45.12	1.52323	0.903	93.259	-1.829	-93.277	DE - Mature
GZUJ98X01_(single)_trimmed_contig_169	light harvesting chlorophyll a b-binding protein	1336	2.16e-150	P:photosynthesis, light harvesting; P:obsolete protein-chromophore linkage; F:chlorophyll binding; F:metal ion binding; C:photosystem I; C:photosystem II; C:chloroplast thylakoid membrane; C:integral component of membrane		P:GO:0009765; C:GO:0016020	P:photosynthesis, light harvesting; C:membrane	629253	49225.2	1928081	627856	9136.22	2975.1	1.61866	0.904	6734.36	-1.925	-6734.36	DE - Mature
GZUJ98X01_(single)_trimmed_contig_16	bidirectional sugar transporter sweet14-like	1498	3.73e-77	P:carbohydrate transport; P:cellular response to organic substance; P:cellular response to oxygen-containing compound; F:sugar transmembrane transporter activity; C:plasma membrane; C:integral component of membrane		C:GO:0016021	C:integral component of membrane	18838	1261.87	51220	9357	216.46	39.54	2.45272	0.989	184.602	-2.759	-184.623	DE - Mature
GZUJ98X01_(single)_trimmed_contig_1702	60s ribosomal protein	512	6.65e-37	P:translation; F:structural constituent of ribosome; C:cell wall; C:plasma membrane; C:chloroplast; C:cytosolic large ribosomal subunit		no IPS match	no IPS match	25417	4984.37	10420	43559	128.84	538.59	-2.06361	0.901	307.052	1.758	307.057	DE - Young
GZUJ98X01_(single)_trimmed_contig_1703	60s ribosomal protein	512	3.9e-37	P:translation; F:structural constituent of ribosome; C:cell wall; C:plasma membrane; C:chloroplast; C:cytosolic large ribosomal subunit		no IPS match	no IPS match	7226	1415.41	15703	3600	194.16	44.51	2.12504	0.971	158.265	-2.431	-158.284	DE - Mature
GZUJ98X01_(single)_trimmed_contig_17071	flavanone 3-hydroxylase	808	1.62e-127	P:flavonoid biosynthetic process; P:obsolete oxidation-reduction process; F:oxidoreductase activity, acting on single donors with incorporation of molecular oxygen, incorporation of two atoms of oxygen; F:L-ascorbic acid binding; F:naringenin 3-dioxygenase activity; F:metal ion binding	Acting on single donors with incorporation of molecular oxygen (oxygenases). The oxygen incorporated need not be derived from O(2); Flavanone 3-dioxygenase	P:GO:0055114; F:GO:0016491; F:GO:0016706	P:obsolete oxidation-reduction process; F:oxidoreductase activity; F:2-oxoglutarate-dependent dioxygenase activity	9097	1110.3	7509	31128	58.83	243.89	-2.05161	0.901	138.55	1.746	138.561	DE - Young
GZUJ98X01_(single)_trimmed_contig_17226	jasmonate-induced protein	780	3.21e-14	F:monosaccharide binding		no GO terms	no GO terms	102247	11509	1899789	22389	15419.1	181.71	6.40694	1	15282.9	-6.713	-15282.9	DE - Mature
GZUJ98X01_(single)_trimmed_contig_1735	grx_s14 - glutaredoxin subgroup ii	463	1.65e-43	P:cell redox homeostasis; F:electron transfer activity; F:protein-disulfide reductase activity		P:GO:0045454; F:GO:0009055; F:GO:0015035	P:cell redox homeostasis; F:electron transfer activity; F:protein-disulfide reductase activity	11863	2521.45	29359	11902	401.43	162.74	1.30258	0.901	269.978	-1.609	-269.983	DE - Mature
GZUJ98X01_(single)_trimmed_contig_1757	post-illumination chlorophyll fluorescence increase protein	1186	3.85e-100	P:chlororespiration; C:chloroplast stroma; C:thylakoid		no GO terms	no GO terms	16118	1405.84	30724	11385	164	60.77	1.43226	0.901	114.921	-1.738	-114.934	DE - Mature
GZUJ98X01_(single)_trimmed_contig_17934	alpha-tubulin	217	4.42e-48	P:obsolete GTP catabolic process; P:microtubule-based process; P:protein polymerization; F:GTPase activity; F:structural constituent of cytoskeleton; F:GTP binding; C:cytoplasm; C:microtubule		P:GO:0006184; P:GO:0007017; P:GO:0051258; F:GO:0003924; F:GO:0005200; F:GO:0005525; C:GO:0005874; C:GO:0032991	P:obsolete GTP catabolic process; P:microtubule-based process; P:protein polymerization; F:GTPase activity; F:structural constituent of cytoskeleton; F:GTP binding; C:microtubule; C:protein-containing complex	1374	578.613	1093	6388	31.89	186.36	-2.54692	0.966	118.948	2.241	118.969	DE - Young
GZUJ98X01_(single)_trimmed_contig_1828	auxin-induced protein	1433	8.11e-66	P:regulation of DNA-templated transcription; F:protein dimerization activity; C:nucleus		P:GO:0006355; F:GO:0046983; C:GO:0005634	P:regulation of DNA-templated transcription; F:protein dimerization activity; C:nucleus	10477	758.605	19383	5260	85.63	23.24	1.88151	0.966	66.879	-2.188	-66.915	DE - Mature
GZUJ98X01_(single)_trimmed_contig_1869	vesicle-associated protein 4-2-like	1403	6.56e-72	P:N-terminal protein myristoylation; P:protein targeting to vacuole; P:response to gibberellin; P:regulation of protein localization; F:structural molecule activity; C:nucleus; C:plasma membrane; C:plastid		no GO terms	no GO terms	10234	745.129	23830	5951	107.53	26.85	2.00175	0.966	85.866	-2.308	-85.897	DE - Mature
GZUJ98X01_(single)_trimmed_contig_1903	histone h2a	937	9.05e-40	P:nucleosome assembly; F:DNA binding; F:protein heterodimerization activity; C:nucleosome; C:nucleus		no IPS match	no IPS match	167137	18264.2	75052	408863	507.07	2762.4	-2.44567	0.966	1728.71	2.14	1728.71	DE - Young
GZUJ98X01_(single)_trimmed_contig_19042	gdsl esterase lipase	1281	9.66e-138	P:lipid metabolic process; F:carboxylic ester hydrolase activity; C:extracellular region; C:cytoplasmic vesicle	Carboxylesterase	P:GO:0006629; F:GO:0016787; F:GO:0016788	P:lipid metabolic process; F:hydrolase activity; F:hydrolase activity, acting on ester bonds	17315	1387.8	7602	56523	37.57	279.33	-2.89432	0.989	188.523	2.588	188.541	DE - Young
GZUJ98X01_(single)_trimmed_contig_1918	chlorophyll a b binding protein	571	2.18e-46	P:photosynthesis, light harvesting; C:membrane		P:GO:0009765; C:GO:0016020	P:photosynthesis, light harvesting; C:membrane	34565	6122.35	81474	4828	903.3	53.53	4.07679	1	860.606	-4.383	-860.617	DE - Mature
GZUJ98X01_(single)_trimmed_contig_19411	translocase of chloroplast chloroplastic	369	6.49e-56	P:obsolete GTP catabolic process; P:intracellular protein transport; F:GTPase activity; F:GTP binding; F:protein-transporting ATPase activity; F:protein homodimerization activity; C:chloroplast outer membrane; C:integral component of membrane		F:GO:0005525	F:GTP binding	3156	862.295	1848	7149	31.7	122.65	-1.95199	0.9	67.557	1.646	67.577	DE - Young
GZUJ98X01_(single)_trimmed_contig_19561	amino acid	1813	0	P:amino acid transmembrane transport; P:protein targeting to membrane; P:water transport; P:nucleotide transport; P:endoplasmic reticulum to Golgi vesicle-mediated transport; P:response to salt stress; P:response to fructose; P:positive regulation of flavonoid biosynthetic process; P:regulation of plant-type hypersensitive response; P:acidic amino acid transport; P:basic amino acid transport; P:n…		no GO terms	no GO terms	27129	1526.47	6945	60251	24.25	210.38	-3.11694	0.99	146.037	2.811	146.064	DE - Young
GZUJ98X01_(single)_trimmed_contig_19566	ribonucleoside-diphosphate reductase large subunit	1155	0	P:gluconeogenesis; P:DNA-templated DNA replication; P:rRNA processing; P:tRNA metabolic process; P:cytoskeleton organization; P:nucleotide biosynthetic process; P:deoxyribonucleoside triphosphate biosynthetic process; P:embryo development ending in seed dormancy; P:chloroplast relocation; P:thylakoid membrane organization; P:proteasomal protein catabolic process; P:response to cadmium ion; P:obso…	Acting on ester bonds; Ribonucleoside-diphosphate reductase	P:GO:0006260; P:GO:0055114; F:GO:0004748; F:GO:0005524; C:GO:0005971	P:DNA replication; P:obsolete oxidation-reduction process; F:ribonucleoside-diphosphate reductase activity, thioredoxin disulfide as acceptor; F:ATP binding; C:ribonucleoside-diphosphate reductase complex	8232	741.881	4514	17305	24.74	94.85	-1.9388	0.9	52.021	1.633	52.047	DE - Young
GZUJ98X01_(single)_trimmed_contig_1960	alanine aminotransferase 2	421	3.37e-12	P:biosynthetic process; F:catalytic activity; F:pyridoxal phosphate binding		no IPS match	no IPS match	15260	3686.43	30538	5136	459.2	77.23	2.57189	0.99	397.012	-2.878	-397.022	DE - Mature
GZUJ98X01_(single)_trimmed_contig_198	photosystem i subunit psi-e	926	5.56e-26	P:photosynthesis, light reaction; P:metal ion transport; P:cellular cation homeostasis; C:chloroplast thylakoid membrane; C:photosystem I reaction center; C:chloroplast envelope; C:plastoglobule		P:GO:0015979; C:GO:0009522; C:GO:0009538	P:photosynthesis; C:photosystem I; C:photosystem I reaction center	65327	7356.73	189562	45569	1295.95	311.53	2.05657	0.971	1044.68	-2.362	-1044.68	DE - Mature
GZUJ98X01_(single)_trimmed_contig_1996	early nodulin-like protein	1025	2.41e-44	F:copper ion binding; F:electron transfer activity		F:GO:0005507; F:GO:0009055	F:copper ion binding; F:electron transfer activity	14945	1494.96	6566	32989	40.55	203.75	-2.32903	0.966	124.35	2.023	124.367	DE - Young
GZUJ98X01_(single)_trimmed_contig_20380	tetratricopeptide repeat domain-containing protein	964	2.83e-88	P:protein targeting to mitochondrion; P:photosynthesis, light reaction; F:protein binding; C:plasma membrane; C:chloroplast thylakoid membrane; C:chloroplast thylakoid lumen; C:chloroplast envelope		F:GO:0005515	F:protein binding	9367	1002.01	5479	22968	35.98	150.83	-2.06766	0.901	86.091	1.762	86.109	DE - Young
GZUJ98X01_(single)_trimmed_contig_2047	fumarylacetoacetate hydrolase domain-containing protein 1 homolog	1147	9.34e-80	P:fatty acid beta-oxidation; P:metabolic process; F:catalytic activity; F:copper ion binding; F:hydrolase activity; F:lyase activity; F:isomerase activity; F:5-oxopent-3-ene-1,2,5-tricarboxylate decarboxylase activity; C:cytoplasm; C:mitochondrion		no IPS match	no IPS match	25525	2279.9	9897	47176	54.62	260.38	-2.25312	0.904	156.111	1.947	156.123	DE - Young
GZUJ98X01_(single)_trimmed_contig_20941	phosphopantothenate--cysteine ligase 2-like	629	1.77e-60	F:ligase activity		no GO terms	no GO terms	6643	1090.62	3030	16765	30.5	168.73	-2.46784	0.966	106.071	2.162	106.093	DE - Young
GZUJ98X01_(single)_trimmed_contig_2162	probable linoleate 9s-lipoxygenase 5-like	353	2.8e-43	P:obsolete oxidation-reduction process; F:iron ion binding; F:protein binding; F:linoleate 13S-lipoxygenase activity	Linoleate 13S-lipoxygenase	P:GO:0055114; F:GO:0005506; F:GO:0005515; F:GO:0016165; F:GO:0016702; F:GO:0046872	P:obsolete oxidation-reduction process; F:iron ion binding; F:protein binding; F:linoleate 13S-lipoxygenase activity; F:oxidoreductase activity, acting on single donors with incorporation of molecular oxygen, incorporation of two atoms of oxygen; F:metal ion binding	28089	7724.19	11223	56679	201.27	1016.47	-2.33636	0.966	621.412	2.03	621.415	DE - Young
GZUJ98X01_(single)_trimmed_contig_2163	lipoxygenase	345	1.31e-40	P:obsolete oxidation-reduction process; F:iron ion binding; F:protein binding; F:linoleate 13S-lipoxygenase activity	Linoleate 13S-lipoxygenase	P:GO:0055114; F:GO:0005506; F:GO:0005515; F:GO:0016165; F:GO:0016702; F:GO:0046872	P:obsolete oxidation-reduction process; F:iron ion binding; F:protein binding; F:linoleate 13S-lipoxygenase activity; F:oxidoreductase activity, acting on single donors with incorporation of molecular oxygen, incorporation of two atoms of oxygen; F:metal ion binding	8814	2526.1	2867	20780	52.61	381.31	-2.85756	0.971	256.019	2.552	256.032	DE - Young
GZUJ98X01_(single)_trimmed_contig_2173	eukaryotic initiation factor 4a-15-like	1275	0	F:nucleic acid binding; F:helicase activity; F:ATP binding		F:GO:0003676; F:GO:0004386; F:GO:0004386; F:GO:0005524	F:nucleic acid binding; F:helicase activity; F:helicase activity; F:ATP binding	25176	2006.25	14951	55625	74.23	276.19	-1.89559	0.9	149.286	1.59	149.295	DE - Young
GZUJ98X01_(single)_trimmed_contig_2175	putative protein	655	6.41e-23	P:pentose-phosphate shunt; P:rRNA processing; P:circadian rhythm; P:response to blue light; P:chloroplast relocation; P:thylakoid membrane organization; P:stomatal complex morphogenesis; P:response to red light; P:response to far red light; P:photosynthesis; P:chlorophyll biosynthetic process; P:carotenoid biosynthetic process; P:photosynthesis, light reaction; P:glucosinolate biosynthetic proces…		no GO terms	no GO terms	11239	1762.07	22964	4335	221.95	41.9	2.40521	0.989	188.19	-2.711	-188.21	DE - Mature
GZUJ98X01_(single)_trimmed_contig_22091	polygalacturonase-inhibiting protein	381	9e-30	P:defense response; C:extracellular region; C:cell wall; C:membrane		no GO terms	no GO terms	973	248.669	2122	11562	35.26	192.11	-2.44583	0.966	120.23	2.14	120.249	DE - Young
GZUJ98X01_(single)_trimmed_contig_22092	polygalacturonase inhibitor protein	379	1.71e-36	F:protein binding		F:GO:0005515	F:protein binding	4172	1074.26	3438	15460	57.43	258.24	-2.16884	0.903	151.573	1.863	151.585	DE - Young
GZUJ98X01_(single)_trimmed_contig_22771	high mobility group b protein 7-like	1258	2.35e-34	P:DNA-templated DNA replication; F:DNA binding; F:DNA-binding transcription factor activity; C:nucleus		no GO terms	no GO terms	11563	939.834	4547	29521	22.88	148.56	-2.69889	0.971	97.359	2.393	97.388	DE - Young
GZUJ98X01_(single)_trimmed_contig_23010	oxidoreductase glyr1-like	206	4.3e-28	P:pentose-phosphate shunt; P:valine metabolic process; P:response to oxidative stress; P:microtubule nucleation; P:gamma-aminobutyric acid metabolic process; P:isopentenyl diphosphate biosynthetic process, methylerythritol 4-phosphate pathway; P:cysteine biosynthetic process; F:nucleotide binding; F:3-hydroxybutyrate dehydrogenase activity; F:phosphogluconate dehydrogenase (decarboxylating) activ…	Phosphogluconate dehydrogenase (NADP(+)-dependent, decarboxylating); 3-hydroxybutyrate dehydrogenase; 3-hydroxyisobutyrate dehydrogenase	P:GO:0055114; F:GO:0016491; F:GO:0016616; F:GO:0050662	P:obsolete oxidation-reduction process; F:oxidoreductase activity; F:oxidoreductase activity, acting on the CH-OH group of donors, NAD or NADP as acceptor; F:obsolete coenzyme binding	1234	559.413	919	3387	28.24	104.09	-1.88202	0.9	55.995	1.576	56.018	DE - Young
GZUJ98X01_(single)_trimmed_contig_2360	bahd acyltransferase dcr-like	1993	7.58e-156	F:acyltransferase activity, transferring groups other than amino-acyl groups		F:GO:0016747	F:acyltransferase activity, transferring groups other than amino-acyl groups	21033	1077.93	17351	81934	55.11	260.26	-2.23957	0.904	155.524	1.934	155.536	DE - Young
GZUJ98X01_(single)_trimmed_contig_2376	unnamed protein product	553	2.12e-11	P:pentose-phosphate shunt; P:thylakoid membrane organization; F:structural molecule activity; C:chloroplast; C:chloroplast thylakoid; C:chloroplast thylakoid membrane; C:chloroplast envelope; C:membrane		no IPS match	no IPS match	6830	1278.76	12986	4854	148.66	55.57	1.41964	0.901	103.785	-1.726	-103.799	DE - Mature
GZUJ98X01_(single)_trimmed_contig_2455	ferric reductase-like transmembrane component	3771	0	P:response to light stimulus; P:photosynthetic electron transport chain; P:electron transport chain; P:obsolete oxidation-reduction process; F:ferric-chelate reductase activity; F:iron ion binding; F:electron transfer activity; F:NAD(P)H oxidase H2O2-forming activity; F:oxidoreductase activity; F:flavin adenine dinucleotide binding; C:nucleus; C:plasma membrane; C:chloroplast; C:plastid; C:membra…		no IPS match	no IPS match	67831	1850.82	139165	48009	233.63	80.6	1.53537	0.903	168.549	-1.841	-168.559	DE - Mature
GZUJ98X01_(single)_trimmed_contig_2474	sucrose transporter	1742	0	P:sucrose transport; P:transmembrane transport; F:sucrose transmembrane transporter activity; C:integral component of plasma membrane		P:GO:0015770; P:GO:0055085; F:GO:0008515; F:GO:0022857; C:GO:0005887; C:GO:0016021	P:sucrose transport; P:transmembrane transport; F:sucrose transmembrane transporter activity; F:transmembrane transporter activity; C:integral component of plasma membrane; C:integral component of membrane	13379	778.269	50815	16576	184.67	60.24	1.61616	0.904	136.035	-1.922	-136.049	DE - Mature
GZUJ98X01_(single)_trimmed_contig_2608	histone h2a	506	7.93e-38	P:nucleosome assembly; P:cell population proliferation; F:DNA binding; F:protein heterodimerization activity; C:nucleosome; C:nucleus; C:chromosome; C:nucleolus; C:plasmodesma		no IPS match	no IPS match	20890	4185.12	7949	58120	99.45	727.15	-2.87021	0.971	489.099	2.564	489.106	DE - Young
GZUJ98X01_(single)_trimmed_contig_2667	elongation factor 2	309	1.97e-49	F:GTP binding		F:GO:0005525	F:GTP binding	4061	1364.16	1788	8496	36.63	174.06	-2.24849	0.904	104.244	1.943	104.262	DE - Young
GZUJ98X01_(single)_trimmed_contig_266	photosystem i psah protein	787	1.51e-60	P:rRNA processing; P:plastid organization; P:photosynthetic electron transport in photosystem I; P:photosystem II assembly; P:cysteine biosynthetic process; P:regulation of protein dephosphorylation; C:chloroplast thylakoid membrane; C:photosystem I reaction center; C:plastoglobule; C:integral component of membrane		P:GO:0015979; C:GO:0009522; C:GO:0009538	P:photosynthesis; C:photosystem I; C:photosystem I reaction center	167883	22250.4	392605	140454	3158.12	1129.81	1.48299	0.901	2245.78	-1.789	-2245.78	DE - Mature
GZUJ98X01_(single)_trimmed_contig_2695	histone h2a	1089	3.56e-41	P:nucleosome assembly; P:DNA-mediated transformation; P:response to wounding; P:response to bacterium; F:DNA binding; F:protein binding; F:protein heterodimerization activity; C:nucleosome; C:cell wall; C:nucleus; C:chromosome; C:nucleolus		no IPS match	no IPS match	38343	3676.08	16260	83361	94.52	484.6	-2.3581	0.966	297.689	2.052	297.696	DE - Young
GZUJ98X01_(single)_trimmed_contig_2720	at4g23890 t32a16_60	249	4.26e-20	P:biological_process; P:response to blue light; P:regulation of proton transport; P:metal ion transport; P:cellular cation homeostasis; P:protein autophosphorylation; F:molecular_function; C:chloroplast; C:chloroplast thylakoid; C:chloroplast thylakoid membrane; C:plastid		no IPS match	no IPS match	2082	803.691	5966	1710	151.68	43.48	1.80261	0.966	116.595	-2.109	-116.614	DE - Mature
GZUJ98X01_(single)_trimmed_contig_2739	proteinase inhibitor	654	5.88e-16	P:defense response		P:GO:0006952	P:defense response	67905	10857.3	35721	140566	345.78	1360.66	-1.97638	0.901	755.425	1.67	755.427	DE - Young
GZUJ98X01_(single)_trimmed_contig_2756	probable caffeoyl- o-methyltransferase at4g26220-like	2144	4.81e-87	P:lipid metabolic process; P:intracellular signal transduction; F:phosphatidylinositol phospholipase C activity; F:calcium ion binding	Phosphoinositide phospholipase C	P:GO:0006629; P:GO:0035556; F:GO:0004435; F:GO:0005509; F:GO:0008081	P:lipid metabolic process; P:intracellular signal transduction; F:phosphatidylinositol phospholipase C activity; F:calcium ion binding; F:phosphoric diester hydrolase activity	43354	2071.28	17802	101305	52.56	299.13	-2.50874	0.966	189.538	2.203	189.551	DE - Young
GZUJ98X01_(single)_trimmed_contig_2764	myosin heavy chain	464	6.1e-30	P:DNA repair; P:biological_process; P:response to abscisic acid; P:response to cadmium ion; P:nucleic acid phosphodiester bond hydrolysis; F:molecular_function; F:nuclease activity; F:ATP binding; F:zinc ion binding; C:cytoplasm; C:cytosol; C:plasma membrane		no GO terms	no GO terms	3329	715.494	7057	2681	96.28	36.58	1.39618	0.901	66.741	-1.702	-66.763	DE - Mature
GZUJ98X01_(single)_trimmed_contig_2771	tubulin alpha	880	2.1e-104	P:microtubule-based process; F:structural constituent of cytoskeleton; F:GTP binding; C:microtubule		P:GO:0007017; F:GO:0005200; F:GO:0005525; C:GO:0005874	P:microtubule-based process; F:structural constituent of cytoskeleton; F:GTP binding; C:microtubule	10836	1258.97	3974	24610	28.59	177.04	-2.63049	0.971	114.705	2.325	114.729	DE - Young
GZUJ98X01_(single)_trimmed_contig_28272	flavanone 3-hydroxylase	327	1.71e-16	P:flavonoid biosynthetic process; P:obsolete oxidation-reduction process; F:oxidoreductase activity, acting on single donors with incorporation of molecular oxygen, incorporation of two atoms of oxygen; F:L-ascorbic acid binding; F:naringenin 3-dioxygenase activity; F:metal ion binding	Acting on single donors with incorporation of molecular oxygen (oxygenases). The oxygen incorporated need not be derived from O(2); Flavanone 3-dioxygenase	no IPS match	no IPS match	2938	945.615	1807	7582	34.98	146.79	-2.06915	0.901	83.814	1.763	83.833	DE - Young
GZUJ98X01_(single)_trimmed_contig_28294	3-ketoacyl- reductase 1	1148	8.34e-137	P:embryo development; P:sterol biosynthetic process; P:cuticle development; P:very long-chain fatty acid biosynthetic process; P:sphingoid biosynthetic process; P:obsolete oxidation-reduction process; F:nucleotide binding; F:estradiol 17-beta-dehydrogenase activity; F:acetoacetyl-CoA reductase activity; F:ketoreductase activity; C:endoplasmic reticulum; C:chloroplast; C:membrane	Acting on the CH-OH group of donors; Acetoacetyl-CoA reductase; 17-beta-estradiol 17-dehydrogenase	P:GO:0008152; F:GO:0016491	P:metabolic process; F:oxidoreductase activity	7877	698.532	4311	16034	23.77	88.42	-1.89523	0.9	47.785	1.589	47.811	DE - Young
GZUJ98X01_(single)_trimmed_contig_2861	60s ribosomal protein l18-2-like	437	2.19e-24	P:translation; F:structural constituent of ribosome; C:intracellular anatomical structure; C:vacuole; C:ribosome; C:plasma membrane; C:chloroplast; C:membrane; C:cytosolic large ribosomal subunit; C:cytosolic ribosome; C:ribonucleoprotein complex		no IPS match	no IPS match	2676	628.991	8503	2561	123.18	37.1	1.73128	0.965	93.234	-2.037	-93.257	DE - Mature
GZUJ98X01_(single)_trimmed_contig_2919	soluble inorganic pyrophosphatase	1307	2.51e-103	P:phosphate-containing compound metabolic process; F:magnesium ion binding; F:inorganic diphosphate phosphatase activity; C:cytoplasm	Inorganic diphosphatase	P:GO:0006796; F:GO:0000287; F:GO:0004427; C:GO:0005737	P:phosphate-containing compound metabolic process; F:magnesium ion binding; F:inorganic diphosphate phosphatase activity; C:cytoplasm	9705	759.495	21118	8340	102.29	40.4	1.34024	0.9	69.66	-1.646	-69.68	DE - Mature
GZUJ98X01_(single)_trimmed_contig_2926	probable caffeoyl- o-methyltransferase at4g26220-like	205	1.94e-20	F:O-methyltransferase activity	Transferring one-carbon groups	F:GO:0008171	F:O-methyltransferase activity	3456	1694.08	1297	7615	40.05	235.16	-2.55377	0.966	150.279	2.248	150.296	DE - Young
GZUJ98X01_(single)_trimmed_contig_29496	ribulose- -bisphosphate carboxylase oxygenase small subunit	260	6.32e-19	P:response to cold; P:response to blue light; P:photorespiration; P:response to red light; P:response to far red light; P:reductive pentose-phosphate cycle; P:obsolete oxidation-reduction process; P:obsolete chloroplast ribulose bisphosphate carboxylase complex biogenesis; F:monooxygenase activity; F:copper ion binding; F:ribulose-bisphosphate carboxylase activity; C:cell wall; C:chloroplast thyl…	Ribulose-bisphosphate carboxylase	no GO terms	no GO terms	32350	11095.1	9124	3014	222.16	73.39	1.59794	0.904	162.908	-1.904	-162.919	DE - Mature
GZUJ98X01_(single)_trimmed_contig_294	60s ribosomal protein l27	859	9.37e-62	P:RNA methylation; P:translation; P:ribosome biogenesis; F:structural constituent of ribosome; C:Golgi apparatus; C:membrane; C:cytosolic large ribosomal subunit		no IPS match	no IPS match	7967	957.403	4620	17063	34.05	125.75	-1.88483	0.9	67.722	1.579	67.74	DE - Young
GZUJ98X01_(single)_trimmed_contig_3004	pgr5-like protein chloroplastic-like	290	1.55e-41	P:maltose metabolic process; P:pentose-phosphate shunt; P:rRNA processing; P:response to blue light; P:plastid organization; P:photosynthetic electron transport in photosystem I; P:chloroplast relocation; P:thylakoid membrane organization; P:response to red light; P:photosystem II assembly; P:response to far red light; P:PSII associated light-harvesting complex II catabolic process; P:photosynthe…		no GO terms	no GO terms	2267	793.214	4886	1065	106.66	23.25	2.19772	0.971	87.916	-2.504	-87.952	DE - Mature
GZUJ98X01_(single)_trimmed_contig_3006	phosphoenolpyruvate carboxylase	292	5.7e-20	P:tricarboxylic acid cycle; P:response to stress; P:metabolic process; P:carbon fixation; P:photosynthesis; P:obsolete oxidation-reduction process; F:catalytic activity; F:oxaloacetate decarboxylase activity; F:phosphoenolpyruvate carboxylase activity; F:oxidoreductase activity; F:lyase activity; F:2-alkenal reductase [NAD(P)+] activity; C:cytoplasm; C:cytosol; C:plasma membrane; C:chloroplast; C…		no IPS match	no IPS match	4925	1597.83	5806	2015	125.88	43.69	1.52667	0.903	90.601	-1.833	-90.62	DE - Mature
GZUJ98X01_(single)_trimmed_contig_3011	lipid transfer protein	378	1.34e-37	P:lipid transport; F:lipid binding		P:GO:0006869; F:GO:0008289	P:lipid transport; F:lipid binding	1336	308.794	18631	7691	312.03	128.81	1.27644	0.9	207.98	-1.582	-207.986	DE - Mature
GZUJ98X01_(single)_trimmed_contig_3050	adenine nucleotide translocator	239	2.28e-37	P:gluconeogenesis; P:ubiquitin-dependent protein catabolic process; P:protein targeting to membrane; P:endoplasmic reticulum to Golgi vesicle-mediated transport; P:cytoskeleton organization; P:photorespiration; P:regulation of plant-type hypersensitive response; P:proteasomal protein catabolic process; P:basic amino acid transport; P:purine nucleotide transport; P:negative regulation of programme…		P:GO:0006810; P:GO:0055085; F:GO:0005215; C:GO:0005743	P:transport; P:transmembrane transport; F:transporter activity; C:mitochondrial inner membrane	3056	1254.43	1547	9275	40.98	245.68	-2.58379	0.966	157.867	2.278	157.884	DE - Young
GZUJ98X01_(single)_trimmed_contig_3123	lhcb6 protein	1088	5.2e-117	P:calcium ion transport; P:Golgi organization; P:response to salt stress; P:photosynthesis, light harvesting; P:nonphotochemical quenching; P:obsolete protein-chromophore linkage; P:cysteine biosynthetic process; P:regulation of protein dephosphorylation; F:chlorophyll binding; F:metal ion binding; C:chloroplast thylakoid membrane; C:photosystem II antenna complex; C:chloroplast envelope; C:plast…		P:GO:0009765; C:GO:0016020	P:photosynthesis, light harvesting; C:membrane	29380	2821.25	81596	31060	474.78	180.73	1.39342	0.901	328.815	-1.699	-328.819	DE - Mature
GZUJ98X01_(single)_trimmed_contig_3153	bidirectional sugar transporter sweet14-like	1536	3.5e-78	P:calcium ion transport; P:Golgi organization; P:response to salt stress; P:leaf senescence; P:sucrose transport; P:cellular cation homeostasis; P:cellular response to abscisic acid stimulus; P:cellular response to salicylic acid stimulus; P:cellular response to osmotic stress; F:sucrose transmembrane transporter activity; C:integral component of plasma membrane; C:cytoplasmic vesicle		no IPS match	no IPS match	33987	2258.94	62797	22756	258.82	93.79	1.46444	0.901	183.08	-1.77	-183.089	DE - Mature
GZUJ98X01_(single)_trimmed_contig_3233	sucrose-phosphate synthase	490	3.75e-64	P:sucrose biosynthetic process; F:sucrose-phosphate synthase activity	Sucrose-phosphate synthase	no IPS match	no IPS match	4997	1017.74	9680	3081	125.06	39.81	1.65142	0.904	92.929	-1.958	-92.949	DE - Mature
GZUJ98X01_(single)_trimmed_contig_3291	fructose-bisphosphate aldolase	313	3.13e-47	P:response to hypoxia; P:glycolytic process; F:fructose-bisphosphate aldolase activity; C:chloroplast	Fructose-bisphosphate aldolase	P:GO:0006096; F:GO:0003824; F:GO:0004332	P:glycolytic process; F:catalytic activity; F:fructose-bisphosphate aldolase activity	9183	2831.12	5182	25845	104.81	522.73	-2.31829	0.966	318.265	2.012	318.271	DE - Young
GZUJ98X01_(single)_trimmed_contig_3398	sorghum bicolor protein targeted either to mitochondria or chloroplast proteins t50848	1382	1.74e-41	C:plastid		no IPS match	no IPS match	8546	630.246	27570	9961	126.29	45.63	1.46869	0.901	89.445	-1.775	-89.463	DE - Mature
GZUJ98X01_(single)_trimmed_contig_3466	oxidoreductase	898	3.23e-76	P:obsolete oxidation-reduction process; F:oxidoreductase activity, acting on single donors with incorporation of molecular oxygen, incorporation of two atoms of oxygen; F:leucocyanidin oxygenase activity; C:cytoplasm	Acting on single donors with incorporation of molecular oxygen (oxygenases). The oxygen incorporated need not be derived from O(2); Acting on paired donors, with incorporation or reduction of molecular oxygen. The oxygen incorporated need not be derived from O(2)	no IPS match	no IPS match	8299	950.154	3795	17937	26.75	126.45	-2.24096	0.904	75.588	1.935	75.613	DE - Young
GZUJ98X01_(single)_trimmed_contig_34	chlorophyll a-b binding protein chloroplastic-like	1628	3.15e-117	P:rRNA processing; P:response to blue light; P:response to high light intensity; P:response to sucrose; P:photosynthesis, light harvesting; P:response to red light; P:regulation of proton transport; P:nonphotochemical quenching; P:response to far red light; P:cysteine biosynthetic process; F:chlorophyll binding; F:metal ion binding; C:mitochondrion; C:PSII associated light-harvesting complex II; …		P:GO:0009765; C:GO:0016020	P:photosynthesis, light harvesting; C:membrane	528266	33503	1319461	387234	5130.86	1505.8	1.76867	0.966	3915.55	-2.075	-3915.55	DE - Mature
GZUJ98X01_(single)_trimmed_contig_3726	photosystem ii protein	379	6.01e-46	P:maltose metabolic process; P:rRNA processing; P:thylakoid membrane organization; P:stomatal complex morphogenesis; P:nonphotochemical quenching; P:photosystem II assembly; P:starch biosynthetic process; P:cysteine biosynthetic process; P:positive regulation of catalytic activity; P:response to karrikin; F:chlorophyll binding; F:xanthophyll binding; C:PSII associated light-harvesting complex II;…		no GO terms	no GO terms	9933	2696.7	5030	21730	84.02	362.97	-2.11105	0.903	209.741	1.805	209.749	DE - Young
GZUJ98X01_(single)_trimmed_contig_3731	bifunctional nuclease in basal defense response 1	499	6.54e-69	P:nucleotide-excision repair; P:response to wounding; P:regulation of histone deacetylation; P:negative regulation of DNA-templated transcription; P:defense response to fungus; P:nucleic acid phosphodiester bond hydrolysis; F:nuclease activity; F:sequence-specific DNA binding	Acting on ester bonds	F:GO:0004518	F:nuclease activity	3151	629.517	6129	2217	77.76	28.13	1.46692	0.901	55.043	-1.773	-55.072	DE - Mature
GZUJ98X01_(single)_trimmed_contig_3756	chloroplast carbonic anhydrase	263	3.8e-32	P:MAPK cascade; P:pentose-phosphate shunt; P:protein targeting to membrane; P:response to cold; P:detection of biotic stimulus; P:salicylic acid biosynthetic process; P:systemic acquired resistance, salicylic acid mediated signaling pathway; P:jasmonic acid mediated signaling pathway; P:response to carbon dioxide; P:regulation of stomatal movement; P:response to chitin; P:regulation of hydrogen p…	Carbonic anhydrase	P:GO:0015976; F:GO:0004089; F:GO:0008270	P:carbon utilization; F:carbonate dehydratase activity; F:zinc ion binding	2367	868.335	6091	1150	146.62	27.68	2.40517	0.989	124.311	-2.711	-124.341	DE - Mature
GZUJ98X01_(single)_trimmed_contig_3860	probable plastid-lipid-associated protein chloroplastic-like	676	5.14e-95	P:pentose-phosphate shunt; P:thylakoid membrane organization; F:structural molecule activity; C:chloroplast thylakoid membrane; C:chloroplast envelope		F:GO:0005198; C:GO:0009507	F:structural molecule activity; C:chloroplast	8572	1278.66	14857	6113	139.13	57.25	1.28109	0.9	92.891	-1.587	-92.904	DE - Mature
GZUJ98X01_(single)_trimmed_contig_3880	proline dehydrogenase	728	1.99e-37	P:proline catabolic process; P:response to oxidative stress; P:response to water deprivation; P:defense response to bacterium; P:obsolete oxidation-reduction process; F:proline dehydrogenase activity; C:mitochondrion	Acting on the CH-NH group of donors	P:GO:0006562; P:GO:0055114; F:GO:0004657	P:proline catabolic process; P:obsolete oxidation-reduction process; F:proline dehydrogenase activity	36459	5073.59	14289	84883	124.26	738.14	-2.57053	0.966	473.172	2.265	473.177	DE - Young
GZUJ98X01_(single)_trimmed_contig_38987	snakin-1	496	4.43e-33	P:defense response; P:response to gibberellin; C:extracellular region; C:cell wall		no GO terms	no GO terms	1645	295.603	14966	5171	191.02	66	1.53319	0.903	137.726	-1.839	-137.738	DE - Mature
GZUJ98X01_(single)_trimmed_contig_3923	sucrose phosphate synthase	2043	0	P:response to hypoxia; P:sucrose biosynthetic process; P:pollen wall assembly; P:galactolipid biosynthetic process; F:sucrose-phosphate synthase activity; C:cytosol; C:plasma membrane; C:plasmodesma	Sucrose-phosphate synthase	P:GO:0005985; P:GO:0009058; F:GO:0046524	P:sucrose metabolic process; P:biosynthetic process; F:sucrose-phosphate synthase activity	19543	994.169	40419	13795	125.25	42.75	1.55081	0.903	90.732	-1.857	-90.751	DE - Mature
GZUJ98X01_(single)_trimmed_contig_39247	chalcone isomerase	249	2.68e-22	P:flavonoid biosynthetic process; P:response to UV-B; P:response to karrikin; F:chalcone isomerase activity; C:nucleus; C:plant-type vacuole membrane; C:extrinsic component of endoplasmic reticulum membrane	Chalcone isomerase	P:GO:0009813; F:GO:0016872; F:GO:0045430	P:flavonoid biosynthetic process; F:intramolecular lyase activity; F:chalcone isomerase activity	1007	390.036	1464	5952	37.22	151.33	-2.02355	0.901	85.249	1.718	85.266	DE - Young
GZUJ98X01_(single)_trimmed_contig_3989	eukaryotic initiation factor iso-4f subunit p82-34-like	530	2.17e-36	P:translational initiation; P:response to virus; P:RNA metabolic process; P:transport of virus in host, cell to cell; F:DNA binding; F:translation initiation factor activity; C:nucleus; C:cytosol		F:GO:0005488	F:binding	2518	493.9	5574	2163	66.58	25.84	1.36548	0.9	45.712	-1.672	-45.743	DE - Mature
GZUJ98X01_(single)_trimmed_contig_4094	histone h3	454	1.99e-57	P:nucleosome assembly; F:DNA binding; F:protein heterodimerization activity; C:nucleosome; C:nucleus		P:GO:0006334; F:GO:0003677; F:GO:0046982; C:GO:0000786	P:nucleosome assembly; F:DNA binding; F:protein heterodimerization activity; C:nucleosome	10582	2425.06	5722	30191	79.79	420.99	-2.39951	0.966	260.941	2.094	260.95	DE - Young
GZUJ98X01_(single)_trimmed_contig_4095	histone h3	545	2.66e-64	P:nucleosome assembly; P:vesicle-mediated transport; F:DNA binding; F:protein heterodimerization activity; C:nucleosome; C:nucleus; C:plastid; C:integral component of membrane		P:GO:0006334; F:GO:0003677; F:GO:0046982; C:GO:0000786	P:nucleosome assembly; F:DNA binding; F:protein heterodimerization activity; C:nucleosome	26659	5259.54	13036	71968	151.42	835.97	-2.4649	0.966	525.18	2.159	525.184	DE - Young
GZUJ98X01_(single)_trimmed_contig_4159	ribonucleoside-diphosphate reductase large subunit-like	1762	0	P:gluconeogenesis; P:DNA-templated DNA replication; P:cytoskeleton organization; P:nucleotide biosynthetic process; P:deoxyribonucleoside triphosphate biosynthetic process; P:proteasomal protein catabolic process; P:response to cadmium ion; P:obsolete oxidation-reduction process; F:ribonucleoside-diphosphate reductase activity, thioredoxin disulfide as acceptor; F:ATP binding; C:ribonucleoside-di…	Ribonucleoside-diphosphate reductase	P:GO:0006260; P:GO:0055114	P:DNA replication; P:obsolete oxidation-reduction process	12605	757.332	6682	25306	24.01	90.92	-1.92096	0.9	49.575	1.615	49.602	DE - Young
GZUJ98X01_(single)_trimmed_contig_43050	heat shock protein 70	582	7.18e-88	P:response to stress; P:obsolete oxidation-reduction process; F:ATP binding; F:2-alkenal reductase [NAD(P)+] activity; C:chloroplast membrane	2-alkenal reductase (NAD(P)(+))	no GO terms	no GO terms	1090	165.763	4198	16619	45.66	180.77	-1.98515	0.901	100.637	1.679	100.651	DE - Young
GZUJ98X01_(single)_trimmed_contig_4333	col domain class transcription factor	2115	2.68e-82	P:response to stimulus; F:zinc ion binding; C:intracellular anatomical structure		F:GO:0008270; C:GO:0005622	F:zinc ion binding; C:intracellular anatomical structure	52403	2536.73	100540	37175	300.94	111.27	1.43541	0.901	211.076	-1.741	-211.083	DE - Mature
GZUJ98X01_(single)_trimmed_contig_4355	histone h2a	221	1.52e-20	P:nucleosome assembly; F:DNA binding; F:protein heterodimerization activity; C:nucleosome; C:nucleus		P:GO:0006334; F:GO:0003677; F:GO:0046982; C:GO:0000786; C:GO:0005634	P:nucleosome assembly; F:DNA binding; F:protein heterodimerization activity; C:nucleosome; C:nucleus	8631	3571.28	4213	20868	120.68	597.77	-2.3084	0.966	363.124	2.002	363.129	DE - Young
GZUJ98X01_(single)_trimmed_contig_4407	proline dehydrogenase mitochondrial-like	589	1.18e-48	P:glutamate biosynthetic process; P:proline catabolic process; P:response to oxidative stress; P:obsolete oxidation-reduction process; F:proline dehydrogenase activity; C:mitochondrion	Acting on the CH-NH group of donors	P:GO:0006537; P:GO:0006562; P:GO:0055114; F:GO:0004657	P:glutamate biosynthetic process; P:proline catabolic process; P:obsolete oxidation-reduction process; F:proline dehydrogenase activity	14049	2389.81	9590	38131	103.07	409.84	-1.99144	0.901	228.612	1.685	228.618	DE - Young
GZUJ98X01_(single)_trimmed_contig_4422	phosphate-induced protein	925	3.49e-87	P:response to arsenic-containing substance; C:Golgi apparatus; C:cytosol; C:plant-type cell wall; C:plasmodesma; C:chloroplast; C:membrane		no GO terms	no GO terms	4657	513.422	16546	5116	113.24	35.01	1.69354	0.965	84.977	-1.999	-85	DE - Mature
GZUJ98X01_(single)_trimmed_contig_4637	hypothetical protein VITISV_006022	1793	2.71e-141	P:biological_process; P:myo-inositol hexakisphosphate biosynthetic process; F:molecular_function; C:cellular_component; C:plastid		no GO terms	no GO terms	20879	1211.46	41310	13172	145.86	46.51	1.64897	0.904	108.311	-1.955	-108.329	DE - Mature
GZUJ98X01_(single)_trimmed_contig_4803	upf0308 protein chloroplastic-like	560	1.78e-53	P:obsolete oxidation-reduction process; F:peroxidase activity; F:peroxiredoxin activity; C:chloroplast stroma	Acting on a peroxide as acceptor; Peroxidase	no IPS match	no IPS match	10574	1965.04	25337	8409	286.43	95.06	1.59127	0.904	209.679	-1.897	-209.687	DE - Mature
GZUJ98X01_(single)_trimmed_contig_4804	upf0308 protein chloroplastic	407	3.19e-31	P:obsolete oxidation-reduction process; F:peroxidase activity; F:peroxiredoxin activity; C:chloroplast stroma	Acting on a peroxide as acceptor; Peroxidase	no GO terms	no GO terms	3597	866.201	9542	2411	148.42	37.5	1.98472	0.966	118.168	-2.291	-118.19	DE - Mature
GZUJ98X01_(single)_trimmed_contig_4825	atp-dependent zinc metalloprotease ftsh chloroplastic-like	342	1.24e-27	P:pentose-phosphate shunt; P:obsolete ATP catabolic process; P:rRNA processing; P:proteolysis; P:chloroplast relocation; P:thylakoid membrane organization; P:photoinhibition; P:photosystem II repair; P:photosystem II assembly; P:PSII associated light-harvesting complex II catabolic process; P:regulation of protein dephosphorylation; P:hydrogen peroxide catabolic process; P:plastid transcription; …	Acting on peptide bonds (peptidases)	no GO terms	no GO terms	7987	2325.22	21673	7517	401.18	139.14	1.52771	0.903	288.829	-1.834	-288.834	DE - Mature
GZUJ98X01_(single)_trimmed_contig_4864	macrophage migration inhibitory factor family protein	301	2.51e-44	P:inflammatory response; P:response to other organism; F:phenylpyruvate tautomerase activity; C:peroxisome; C:chloroplast; C:membrane	Phenylpyruvate tautomerase	no GO terms	no GO terms	2952	947.156	6324	2368	133.01	49.8	1.41732	0.901	92.785	-1.723	-92.801	DE - Mature
GZUJ98X01_(single)_trimmed_contig_48690	probable histone -like	349	1.6e-38	P:nucleosome assembly; P:cell population proliferation; F:DNA binding; F:protein heterodimerization activity; C:nucleosome; C:nucleolus		no GO terms	no GO terms	7945	2005.1	29092	146659	527.71	2660.3	-2.33377	0.966	1625.41	2.028	1625.41	DE - Young
GZUJ98X01_(single)_trimmed_contig_49074	predicted protein	273	8.97e-18	P:maltose metabolic process; P:pentose-phosphate shunt; P:starch biosynthetic process; F:nucleotide binding; F:nucleic acid binding; F:heat shock protein binding; F:unfolded protein binding; C:chloroplast		no IPS match	no IPS match	24	8.223	5524	2065	128.1	47.89	1.41947	0.901	89.425	-1.726	-89.441	DE - Mature
GZUJ98X01_(single)_trimmed_contig_496	nitrate reductase	363	3.71e-64	P:nitrate assimilation; P:obsolete oxidation-reduction process; F:iron ion binding; F:electron transfer activity; F:nitrate reductase (NADH) activity; F:heme binding; F:molybdenum ion binding; F:molybdopterin cofactor binding; F:flavin adenine dinucleotide binding	Nitrate reductase (NADH)	P:GO:0055114; F:GO:0016491; F:GO:0030151; F:GO:0046872	P:obsolete oxidation-reduction process; F:oxidoreductase activity; F:molybdenum ion binding; F:metal ion binding	8701	2391.36	26626	8977	464.35	156.56	1.5685	0.904	337.949	-1.874	-337.954	DE - Mature
GZUJ98X01_(single)_trimmed_contig_5028	arachidonic acid-induced dea1	801	7.84e-12	P:lipid transport; F:lipid binding; C:extracellular region		no IPS match	no IPS match	42149	5509.41	14070	125983	111.2	995.7	-3.16255	0.99	694.729	2.857	694.735	DE - Young
GZUJ98X01_(single)_trimmed_contig_5054	peroxidase	1767	2.04e-133	P:response to oxidative stress; P:obsolete oxidation-reduction process; F:peroxidase activity; F:heme binding; F:metal ion binding; C:vacuole; C:plant-type cell wall; C:membrane	Peroxidase	P:GO:0006979; P:GO:0055114; F:GO:0004601; F:GO:0020037	P:response to oxidative stress; P:obsolete oxidation-reduction process; F:peroxidase activity; F:heme binding	36238	2109.94	12567	91862	45.02	329.11	-2.86993	0.971	221.36	2.564	221.375	DE - Young
GZUJ98X01_(single)_trimmed_contig_5098	proline dehydrogenase	754	2.53e-78	P:glutamate biosynthetic process; P:proline catabolic process; P:response to oxidative stress; P:obsolete oxidation-reduction process; F:proline dehydrogenase activity; C:mitochondrion	Acting on the CH-NH group of donors	P:GO:0006537; P:GO:0006562; P:GO:0055114; F:GO:0004657	P:glutamate biosynthetic process; P:proline catabolic process; P:obsolete oxidation-reduction process; F:proline dehydrogenase activity	43901	5955.42	17814	96790	149.57	812.66	-2.44183	0.966	508.165	2.136	508.17	DE - Young
GZUJ98X01_(single)_trimmed_contig_5107	histone h3	946	4.87e-49	P:nucleosome assembly; F:DNA binding; F:protein heterodimerization activity; C:nucleosome; C:nucleus		no GO terms	no GO terms	28392	3006.15	13059	57207	87.39	382.83	-2.13116	0.903	222.445	1.825	222.452	DE - Young
GZUJ98X01_(single)_trimmed_contig_5116	lil3 protein	684	1.98e-49	P:very long-chain fatty acid metabolic process; P:pentose-phosphate shunt; P:rRNA processing; P:regulation of translation; P:response to blue light; P:photosynthesis, light harvesting; P:chloroplast relocation; P:leaf morphogenesis; P:thylakoid membrane organization; P:stomatal complex morphogenesis; P:response to red light; P:photosystem II assembly; P:response to far red light; P:chlorophyll bi…		no GO terms	no GO terms	8135	1175.57	4747	22283	43.94	206.24	-2.23072	0.904	122.981	1.925	122.996	DE - Young
GZUJ98X01_(single)_trimmed_contig_51430	40s ribosomal protein s5	438	3.59e-94	P:translation; F:RNA binding; F:structural constituent of ribosome; C:cell wall; C:vacuolar membrane; C:plasma membrane; C:plasmodesma; C:chloroplast; C:cytosolic small ribosomal subunit		P:GO:0006412; F:GO:0003723; F:GO:0003735; C:GO:0015935	P:translation; F:RNA binding; F:structural constituent of ribosome; C:small ribosomal subunit	1172	234.642	3126	11766	45.18	170.06	-1.91229	0.9	92.449	1.606	92.463	DE - Young
GZUJ98X01_(single)_trimmed_contig_5197	60s ribosomal protein l39	400	1.55e-17	P:translation; F:structural constituent of ribosome; C:mitochondrion; C:cytosolic large ribosomal subunit		no IPS match	no IPS match	3113	780.53	1495	8112	23.66	128.39	-2.44001	0.966	80.249	2.134	80.278	DE - Young
GZUJ98X01_(single)_trimmed_contig_5261	histone h3	302	6.03e-22	P:nucleosome assembly; F:DNA binding; F:protein heterodimerization activity; C:nucleosome; C:nucleus		no IPS match	no IPS match	14767	4724.73	4280	37206	89.72	779.93	-3.11984	0.99	541.562	2.814	541.569	DE - Young
GZUJ98X01_(single)_trimmed_contig_5319	at3g60750-like protein	232	1.55e-33	P:gluconeogenesis; P:glycolytic process; P:calcium ion transport; P:water transport; P:hyperosmotic response; P:Golgi organization; P:response to temperature stimulus; P:response to salt stress; P:response to fructose; P:plant-type cell wall biogenesis; P:regulation of meristem growth; P:cell growth; P:reductive pentose-phosphate cycle; P:isopentenyl diphosphate biosynthetic process, methylerythr…	Transketolase	no GO terms	no GO terms	6511	2646.42	14069	3997	383.9	109.07	1.81548	0.966	295.887	-2.121	-295.894	DE - Mature
GZUJ98X01_(single)_trimmed_contig_5742	oxidoreductase	696	9.59e-47	P:toxin catabolic process; P:response to wounding; P:coumarin biosynthetic process; P:hydrogen peroxide-mediated programmed cell death; P:response to cyclopentenone; P:obsolete oxidation-reduction process; F:2-oxoglutarate-dependent dioxygenase activity; C:cytoplasm	Acting on paired donors, with incorporation or reduction of molecular oxygen. The oxygen incorporated need not be derived from O(2)	no GO terms	no GO terms	9283	1353.32	3545	18632	32.24	169.47	-2.39411	0.966	104.919	2.088	104.94	DE - Young
GZUJ98X01_(single)_trimmed_contig_5755	at3g46780 t6h20_190	788	4.67e-78	P:pentose-phosphate shunt; P:rRNA processing; P:circadian rhythm; P:response to blue light; P:chloroplast relocation; P:thylakoid membrane organization; P:stomatal complex morphogenesis; P:response to red light; P:response to far red light; P:chlorophyll biosynthetic process; P:carotenoid biosynthetic process; P:photosynthesis, light reaction; P:glucosinolate biosynthetic process; F:nucleotide bi…		no GO terms	no GO terms	18524	2408.88	42135	17302	338.5	139	1.28407	0.901	226.224	-1.59	-226.229	DE - Mature
GZUJ98X01_(single)_trimmed_contig_5770	pollen-specific protein c13	303	1.29e-24	P:cellular process; P:cellular component organization or biogenesis; C:extracellular region		no GO terms	no GO terms	5527	1817.45	1529	16703	31.95	348.98	-3.44926	0.996	250.528	3.144	250.547	DE - Young
GZUJ98X01_(single)_trimmed_contig_588	ascorbate peroxidase	1181	1.55e-117	P:response to oxidative stress; P:obsolete oxidation-reduction process; F:L-ascorbate peroxidase activity; F:heme binding; C:chloroplast; C:membrane	L-ascorbate peroxidase	P:GO:0006979; P:GO:0055114; F:GO:0004601; F:GO:0020037	P:response to oxidative stress; P:obsolete oxidation-reduction process; F:peroxidase activity; F:heme binding	48287	4196.13	129514	5739	694.25	30.76	4.49633	1	669.836	-4.802	-669.853	DE - Mature
GZUJ98X01_(single)_trimmed_contig_5917	non-specific lipid-transfer protein at2g13820-like	705	2.71e-28	C:cytoplasmic vesicle		no GO terms	no GO terms	11946	1716.38	6674	25792	59.93	231.6	-1.95028	0.9	127.508	1.644	127.519	DE - Young
GZUJ98X01_(single)_trimmed_contig_599	photosystem i reaction center subunit x psak	1245	1.83e-47	P:photosynthesis; P:cysteine biosynthetic process; P:metal ion transport; P:cellular cation homeostasis; F:chlorophyll binding; C:photosystem I; C:chloroplast thylakoid membrane; C:integral component of membrane		no GO terms	no GO terms	143576	11899.3	405054	132673	2059.64	674.62	1.61025	0.904	1514.99	-1.916	-1515	DE - Mature
GZUJ98X01_(single)_trimmed_contig_6020	retinol dehydrogenase	1312	6.46e-91	P:pollen tube growth; P:obsolete oxidation-reduction process; F:protochlorophyllide reductase activity	Protochlorophyllide reductase	P:GO:0008152; F:GO:0016491	P:metabolic process; F:oxidoreductase activity	13035	1020.65	5643	27238	27.23	131.43	-2.27103	0.904	79.142	1.965	79.167	DE - Young
GZUJ98X01_(single)_trimmed_contig_60	thaumatin-like protein	1321	8.46e-107	P:cytokinesis by cell plate formation; P:plant-type cell wall organization; P:cell wall modification; P:response to other organism; C:extracellular region; C:plant-type cell wall; C:plasmodesma; C:cytoplasmic vesicle		no GO terms	no GO terms	21394	1653.56	18032	81335	86.41	389.78	-2.17339	0.904	229.05	1.867	229.057	DE - Young
GZUJ98X01_(single)_trimmed_contig_6141	glutathione s-transferase	1378	4.32e-109	P:glutathione metabolic process; P:de-etiolation; P:cellular catabolic process; P:response to cadmium ion; P:lateral root development; P:response to growth hormone; P:response to karrikin; P:organic substance catabolic process; F:lactoylglutathione lyase activity; F:protein binding; F:transferase activity; C:chloroplast	Lactoylglutathione lyase	F:GO:0005515	F:protein binding	25476	1888.04	13858	60199	63.66	276.56	-2.11913	0.903	160.163	1.813	160.173	DE - Young
GZUJ98X01_(single)_trimmed_contig_6144	histone h2a	543	2.6e-35	P:nucleosome assembly; F:DNA binding; F:protein heterodimerization activity; C:nucleosome; C:nucleolus		P:GO:0006334; F:GO:0003677; F:GO:0046982; C:GO:0000786; C:GO:0005634	P:nucleosome assembly; F:DNA binding; F:protein heterodimerization activity; C:nucleosome; C:nucleus	6926	1319.54	3300	25045	38.47	291.99	-2.92411	0.989	197.863	2.618	197.881	DE - Young
GZUJ98X01_(single)_trimmed_contig_6312	epoxide hydrolase	1714	1.62e-119	P:metabolic process; F:epoxide hydrolase activity; F:non-membrane spanning protein tyrosine kinase activity; F:cis-stilbene-oxide hydrolase activity	Microsomal epoxide hydrolase; Soluble epoxide hydrolase; Non-specific protein-tyrosine kinase	F:GO:0003824	F:catalytic activity	14063	847.741	6630	28407	24.49	104.92	-2.09903	0.901	60.428	1.793	60.454	DE - Young
GZUJ98X01_(single)_trimmed_contig_6331	calnexin homolog	222	7.29e-15	P:protein folding; P:response to heat; P:response to high light intensity; P:response to endoplasmic reticulum stress; P:response to hydrogen peroxide; F:calcium ion binding; F:unfolded protein binding; C:mitochondrion; C:vacuolar membrane; C:endoplasmic reticulum membrane; C:plasma membrane; C:plant-type cell wall; C:chloroplast; C:integral component of membrane; C:cytoplasmic vesicle		no IPS match	no IPS match	1467	624.248	843	3623	24.04	103.31	-2.10347	0.901	59.576	1.798	59.603	DE - Young
GZUJ98X01_(single)_trimmed_contig_6407	chilling-responsive protein	817	1.4e-104	P:cell morphogenesis; P:gluconeogenesis; P:glycolytic process; P:response to desiccation; P:response to salt stress; P:embryo development ending in seed dormancy; P:cell growth; P:cysteine biosynthetic process; P:response to cadmium ion; P:Golgi vesicle transport; C:Golgi apparatus; C:cytosol; C:plasma membrane; C:plasmodesma		P:GO:0009269	P:response to desiccation	24688	3040.23	8810	51534	68.27	399.32	-2.54822	0.966	254.931	2.242	254.941	DE - Young
GZUJ98X01_(single)_trimmed_contig_64678	photosystem i reaction center subunit xi	261	2.91e-32	P:rRNA processing; P:plastid organization; P:photosystem II assembly; P:metal ion transport; P:cellular cation homeostasis; C:chloroplast thylakoid membrane; C:photosystem I reaction center; C:chloroplast envelope; C:plastoglobule; C:integral component of membrane		P:GO:0015979; C:GO:0009522; C:GO:0009538	P:photosynthesis; C:photosystem I; C:photosystem I reaction center	34	13.552	24897	9829	603.89	238.41	1.34084	0.901	411.325	-1.647	-411.328	DE - Mature
GZUJ98X01_(single)_trimmed_contig_6467	proline dehydrogenase mitochondrial-like	400	1.39e-50	P:glutamate biosynthetic process; P:proline catabolic process; P:response to oxidative stress; P:obsolete oxidation-reduction process; F:proline dehydrogenase activity; C:mitochondrion	Acting on the CH-NH group of donors	P:GO:0006537; P:GO:0006562; P:GO:0055114; F:GO:0004657	P:glutamate biosynthetic process; P:proline catabolic process; P:obsolete oxidation-reduction process; F:proline dehydrogenase activity	12080	2987.97	3028	32757	47.92	518.43	-3.43545	0.996	371.71	3.129	371.723	DE - Young
GZUJ98X01_(single)_trimmed_contig_6470	medium-chain-fatty-acid-- ligase	1153	2.21e-129	P:acetate metabolic process; P:glyoxylate cycle; P:butyrate metabolic process; F:acetate-CoA ligase activity; F:o-succinylbenzoate-CoA ligase activity; F:AMP binding; F:butyrate-CoA ligase activity; C:mitochondrion; C:peroxisome	Acetate--CoA ligase; Medium-chain acyl-CoA ligase; o-succinylbenzoate--CoA ligase	P:GO:0008152; F:GO:0003824	P:metabolic process; F:catalytic activity	8288	745.768	20905	7729	114.78	42.44	1.43537	0.901	80.51	-1.741	-80.528	DE - Mature
GZUJ98X01_(single)_trimmed_contig_650	phosphate triose-phosphate translocator precursor	216	9.8e-33	P:photosynthetic acclimation; P:phosphoglycerate transmembrane transport; P:cysteine biosynthetic process; P:photosynthesis, light reaction; P:regulation of protein dephosphorylation; P:triose phosphate transmembrane transport; F:phosphoglycerate transmembrane transporter activity; F:antiporter activity; F:triose-phosphate transmembrane transporter activity; C:mitochondrion; C:chloroplast thylako…		no GO terms	no GO terms	7621	3381.23	18287	3824	535.97	112.08	2.25762	0.971	445.62	-2.564	-445.627	DE - Mature
GZUJ98X01_(single)_trimmed_contig_6523	plasma membrane atpase 4-like isoform 1	212	1.62e-27	P:obsolete ATP catabolic process; P:ATP biosynthetic process; P:proton transmembrane transport; F:ATP binding; F:P-type proton-exporting transporter activity; F:metal ion binding; C:plasma membrane; C:integral component of membrane	Acting on acid anhydrides	no GO terms	no GO terms	1386	621.505	3215	1053	96	31.44	1.61043	0.904	70.619	-1.916	-70.645	DE - Mature
GZUJ98X01_(single)_trimmed_contig_6582	lipid transfer protein	382	5.26e-34	P:lipid transport; F:lipid binding		P:GO:0006869; F:GO:0008289	P:lipid transport; F:lipid binding	15656	3985.4	5202	46375	86.21	768.54	-3.15619	0.99	535.859	2.85	535.867	DE - Young
GZUJ98X01_(single)_trimmed_contig_6611	lipid transfer protein	382	6.87e-34	P:lipid transport; F:lipid binding		P:GO:0006869; F:GO:0008289	P:lipid transport; F:lipid binding	14742	3771.55	4080	43873	67.62	727.08	-3.42659	0.996	520.902	3.121	520.911	DE - Young
GZUJ98X01_(single)_trimmed_contig_6618	glycine-rich protein 2b-like	303	3.3e-28	P:regulation of DNA-templated transcription; P:response to cold; P:embryo development; P:fruit development; P:proteolysis involved in protein catabolic process; F:DNA binding; F:RNA binding; F:threonine-type endopeptidase activity; F:serine-type peptidase activity; F:zinc ion binding; C:nucleus; C:cytosol; C:proteasome core complex; C:integral component of membrane	Acting on peptide bonds (peptidases)	P:GO:0006355; F:GO:0003676; F:GO:0003677	P:regulation of DNA-templated transcription; F:nucleic acid binding; F:DNA binding	2445	796.046	2183	8464	45.61	176.84	-1.95502	0.9	97.509	1.649	97.522	DE - Young
GZUJ98X01_(single)_trimmed_contig_6660	iron superoxide dismutase partial	507	4.06e-42	P:rRNA processing; P:tRNA metabolic process; P:superoxide metabolic process; P:response to UV; P:chloroplast organization; P:plastid transcription; P:positive regulation of DNA-templated transcription; P:obsolete oxidation-reduction process; F:superoxide dismutase activity; F:metal ion binding; C:thylakoid; C:chloroplast nucleoid	Superoxide dismutase	P:GO:0006801; P:GO:0055114; F:GO:0004784; F:GO:0046872	P:superoxide metabolic process; P:obsolete oxidation-reduction process; F:superoxide dismutase activity; F:metal ion binding	8798	1746.75	19047	5602	237.83	69.95	1.76553	0.966	181.375	-2.071	-181.387	DE - Mature
GZUJ98X01_(single)_trimmed_contig_676	23kda polypeptide of the oxygen evolving complex of photosystem ii	209	1.33e-29	P:photosynthesis; F:calcium ion binding; C:chloroplast thylakoid membrane; C:photosystem II oxygen evolving complex; C:extrinsic component of membrane		P:GO:0015979; F:GO:0005509; C:GO:0009523; C:GO:0009654; C:GO:0019898	P:photosynthesis; F:calcium ion binding; C:photosystem II; C:photosystem II oxygen evolving complex; C:extrinsic component of membrane	21274	9518.89	45561	12002	1380.05	363.54	1.92453	0.966	1086.74	-2.23	-1086.74	DE - Mature
GZUJ98X01_(single)_trimmed_contig_68885	histone h2a	502	5.83e-42	P:nucleosome assembly; F:DNA binding; F:protein heterodimerization activity; C:nucleosome; C:nucleus		no GO terms	no GO terms	3421	635.434	5979	28961	75.4	365.22	-2.27613	0.904	220.191	1.97	220.2	DE - Young
GZUJ98X01_(single)_trimmed_contig_691	chlorophyllide a chloroplastic-like	278	4.11e-47	P:aromatic amino acid family biosynthetic process; P:leaf morphogenesis; P:chlorophyll biosynthetic process; P:cysteine biosynthetic process; P:cell differentiation; P:positive regulation of DNA-templated transcription; P:obsolete oxidation-reduction process; F:iron ion binding; F:chlorophyllide a oxygenase [overall] activity; F:oxidoreductase activity, acting on paired donors, with incorporation…	Chlorophyllide a oxygenase	P:GO:0055114; F:GO:0005506; F:GO:0016491; F:GO:0016705; F:GO:0051537	P:obsolete oxidation-reduction process; F:iron ion binding; F:oxidoreductase activity; F:oxidoreductase activity, acting on paired donors, with incorporation or reduction of molecular oxygen; F:2 iron, 2 sulfur cluster binding	1693	607.205	4594	1703	104.62	38.78	1.43177	0.901	73.296	-1.738	-73.317	DE - Mature
GZUJ98X01_(single)_trimmed_contig_6987	protein thylakoid chloroplastic-like	382	5.64e-20	P:rRNA processing; P:regulation of translation; P:phosphatidylglycerol biosynthetic process; P:G protein-coupled receptor signaling pathway; P:photosynthetic electron transport in photosystem I; P:chloroplast relocation; P:thylakoid membrane organization; P:sugar mediated signaling pathway; P:photosystem II assembly; P:isopentenyl diphosphate biosynthetic process, methylerythritol 4-phosphate pat…		P:GO:0010027; P:GO:0015979; C:GO:0009523	P:thylakoid membrane organization; P:photosynthesis; C:photosystem II	5638	1349.36	14341	5176	237.66	85.78	1.47019	0.901	168.395	-1.776	-168.405	DE - Mature
GZUJ98X01_(single)_trimmed_contig_7006	caffeoyl- o-methyltransferase	820	7.02e-72	P:anthocyanin-containing compound biosynthetic process; P:lignin biosynthetic process; P:methylation; P:cyanidin 3-O-glucoside biosynthetic process; P:delphinidin 3-O-glucoside biosynthetic process; P:pigmentation; P:seed development; P:spermidine hydroxycinnamate conjugate biosynthetic process; F:caffeoyl-CoA O-methyltransferase activity; F:metal ion binding; F:trihydroxyferuloyl spermidine O-me…	Transferring one-carbon groups; Caffeoyl-CoA O-methyltransferase	F:GO:0008171	F:O-methyltransferase activity	8908	1094.44	4326	17962	33.4	138.67	-2.05374	0.901	78.832	1.748	78.852	DE - Young
GZUJ98X01_(single)_trimmed_contig_7024	af469064_1 polyamine oxidase	282	8.02e-35	P:obsolete oxidation-reduction process; F:oxidoreductase activity; C:mitochondrion		no GO terms	no GO terms	16324	5695.75	5642	43832	126.66	983.99	-2.95768	0.989	669.783	2.652	669.789	DE - Young
GZUJ98X01_(single)_trimmed_contig_7043	flavin containing polyamine oxidase	683	1.01e-61	P:obsolete oxidation-reduction process; F:oxidoreductase activity, acting on the CH-NH group of donors, oxygen as acceptor; C:cytoplasmic vesicle		P:GO:0055114; F:GO:0016491	P:obsolete oxidation-reduction process; F:oxidoreductase activity	72798	10706.7	12097	173432	112.13	1607.52	-3.84159	0.999	1189.07	3.536	1189.08	DE - Young
GZUJ98X01_(single)_trimmed_contig_7099	af469064_1 polyamine oxidase	282	8.02e-35	P:obsolete oxidation-reduction process; F:oxidoreductase activity; C:mitochondrion		no GO terms	no GO terms	19286	6722.11	1244	60353	27.93	1354.87	-5.6002	1	1068.81	5.294	1068.82	DE - Young
GZUJ98X01_(single)_trimmed_contig_70	chlorophyll a-b binding protein	722	1.26e-44	P:photosynthesis, light harvesting; P:obsolete protein-chromophore linkage; P:cysteine biosynthetic process; F:chlorophyll binding; F:metal ion binding; C:photosystem I; C:photosystem II; C:chloroplast thylakoid membrane; C:plastoglobule; C:integral component of membrane; C:light-harvesting complex		no IPS match	no IPS match	64242	9385.8	172792	36647	1515.08	321.33	2.23727	0.971	1256.03	-2.543	-1256.04	DE - Mature
GZUJ98X01_(single)_trimmed_contig_71	chlorophyll a-b binding protein	278	3.61e-35	P:photosynthesis, light harvesting; P:obsolete protein-chromophore linkage; P:cysteine biosynthetic process; F:chlorophyll binding; F:metal ion binding; C:photosystem I; C:photosystem II; C:chloroplast thylakoid membrane; C:plastoglobule; C:integral component of membrane; C:light-harvesting complex		P:GO:0009765; C:GO:0016020	P:photosynthesis, light harvesting; C:membrane	38373	13681.8	121454	35212	2765.76	801.85	1.78627	0.966	2118.63	-2.092	-2118.63	DE - Mature
GZUJ98X01_(single)_trimmed_contig_7205	hydrophobic protein lti6a	609	1.81e-18	P:glycolytic process; P:water transport; P:Golgi organization; P:response to cold; P:response to water deprivation; P:response to abscisic acid; P:hyperosmotic salinity response; P:response to cadmium ion; C:plasma membrane; C:integral component of membrane; C:cytoplasmic vesicle		no GO terms	no GO terms	5017	838.486	2466	10435	25.63	108.47	-2.08139	0.901	62.156	1.775	62.181	DE - Young
GZUJ98X01_(single)_trimmed_contig_721	psal protein	947	5.62e-61	P:rRNA processing; P:plastid organization; P:photosystem II assembly; P:metal ion transport; P:cellular cation homeostasis; C:chloroplast thylakoid membrane; C:photosystem I reaction center; C:chloroplast envelope; C:plastoglobule; C:integral component of membrane		no GO terms	no GO terms	96596	10327	313792	112678	2097.68	753.25	1.47759	0.901	1489.42	-1.784	-1489.42	DE - Mature
GZUJ98X01_(single)_trimmed_contig_722	early tobacco anther	932	6.42e-30	C:cytoplasm		no GO terms	no GO terms	24975	2711.72	13394	79958	90.98	543.12	-2.57765	0.966	348.606	2.272	348.613	DE - Young
GZUJ98X01_(single)_trimmed_contig_74533	heat shock	215	5.38e-31	P:response to heat; P:obsolete oxidation-reduction process; F:ATP binding; F:2-alkenal reductase [NAD(P)+] activity; C:cell wall; C:plasma membrane; C:chloroplast	2-alkenal reductase (NAD(P)(+))	no GO terms	no GO terms	92	35.902	2432	9107	71.61	268.15	-1.90481	0.9	145.408	1.599	145.417	DE - Young
GZUJ98X01_(single)_trimmed_contig_75162	histone h2a	290	4.86e-11	P:nucleosome assembly; F:DNA binding; F:protein heterodimerization activity; C:nucleosome; C:nucleus		no IPS match	no IPS match	7579	2545.78	7023	31619	153.31	690.24	-2.17065	0.903	405.322	1.865	405.326	DE - Young
GZUJ98X01_(single)_trimmed_contig_7557	alpha- -glucan-protein synthase	210	2.68e-30	P:cellulose biosynthetic process; P:UDP-L-arabinose metabolic process; P:cell wall organization; F:glycogenin glucosyltransferase activity; F:UDP-arabinopyranose mutase activity; C:extracellular region; C:cell wall; C:Golgi apparatus; C:cytosol; C:plasmodesma; C:membrane	UDP-arabinopyranose mutase; Glycogenin glucosyltransferase	P:GO:0030244; F:GO:0016866	P:cellulose biosynthetic process; F:intramolecular transferase activity	4079	1969.28	1442	8960	43.47	270.11	-2.63546	0.971	175.149	2.329	175.164	DE - Young
GZUJ98X01_(single)_trimmed_contig_7608	conserved hypothetical protein	975	7.81e-74	P:translational initiation; P:biological_process; F:translation initiation factor activity; F:carbon-nitrogen ligase activity, with glutamine as amido-N-donor; C:extracellular region; C:mitochondrion		no IPS match	no IPS match	6221	667.841	4750	17784	30.84	115.47	-1.90464	0.9	62.609	1.599	62.63	DE - Young
GZUJ98X01_(single)_trimmed_contig_762	atp synthase b chain	1265	3.99e-66	P:MAPK cascade; P:pentose-phosphate shunt; P:rRNA processing; P:protein targeting to membrane; P:response to cold; P:detection of biotic stimulus; P:plastid organization; P:salicylic acid biosynthetic process; P:photorespiration; P:systemic acquired resistance, salicylic acid mediated signaling pathway; P:jasmonic acid mediated signaling pathway; P:response to chitin; P:photosystem II assembly; P…		P:GO:0015986; F:GO:0015078; C:GO:0045263	P:proton motive force-driven ATP synthesis; F:proton transmembrane transporter activity; C:proton-transporting ATP synthase complex, coupling factor F(o)	119201	9603.7	325040	132716	1626.65	664.17	1.29228	0.901	1090.16	-1.598	-1090.16	DE - Mature
GZUJ98X01_(single)_trimmed_contig_771	PsbY precursor	619	3.21e-26	P:nitrogen compound metabolic process; P:cellular component organization; P:photosynthesis, light reaction; P:cellular component biogenesis; P:primary metabolic process; P:cellular macromolecule metabolic process; F:manganese ion binding; C:photosystem II; C:chloroplast thylakoid membrane; C:integral component of membrane		P:GO:0015979; F:GO:0030145; C:GO:0009523; C:GO:0016021	P:photosynthesis; F:manganese ion binding; C:photosystem II; C:integral component of membrane	13517	2175.96	56613	21748	578.99	222.42	1.38025	0.901	399.354	-1.686	-399.358	DE - Mature
GZUJ98X01_(single)_trimmed_contig_776	constans protein	1808	1.04e-168	P:regulation of DNA-templated transcription; P:circadian rhythm; P:regulation of flower development; P:far-red light signaling pathway; P:inflorescence development; P:long-day photoperiodism; P:short-day photoperiodism; F:DNA binding; F:DNA-binding transcription factor activity; F:protein binding; F:zinc ion binding; C:nucleus		F:GO:0005515	F:protein binding	61606	3472.05	138040	53736	483.34	188.15	1.36116	0.901	331.374	-1.667	-331.378	DE - Mature
GZUJ98X01_(single)_trimmed_contig_791	histone h2a	631	4.82e-34	P:nucleosome assembly; F:DNA binding; F:protein heterodimerization activity; C:nucleosome; C:nucleus		P:GO:0006334; F:GO:0003677; F:GO:0046982; C:GO:0000786; C:GO:0005634	P:nucleosome assembly; F:DNA binding; F:protein heterodimerization activity; C:nucleosome; C:nucleus	53909	8859.41	36411	181013	365.3	1816.05	-2.31365	0.966	1104.52	2.008	1104.52	DE - Young
GZUJ98X01_(single)_trimmed_contig_8038	endo-beta- -glucanase	1630	0	P:carbohydrate metabolic process; F:cellulase activity; F:carbohydrate binding; C:extracellular region	Cellulase	P:GO:0005975; F:GO:0003824; F:GO:0004553	P:carbohydrate metabolic process; F:catalytic activity; F:hydrolase activity, hydrolyzing O-glycosyl compounds	9643	614.944	6396	25625	24.84	99.52	-2.00232	0.901	55.705	1.696	55.73	DE - Young
GZUJ98X01_(single)_trimmed_contig_819	rieske iron-sulphur protein precursor	311	1.37e-18	P:nonphotochemical quenching; P:photosynthesis; P:electron transport chain; P:defense response to bacterium; P:response to karrikin; F:ubiquinol-cytochrome-c reductase activity; F:plastoquinol--plastocyanin reductase activity; F:electron transporter, transferring electrons within cytochrome b6/f complex of photosystem II activity; F:metal ion binding; F:2 iron, 2 sulfur cluster binding; C:plasma …	Acting on diphenols and related substances as donors; Acting on diphenols and related substances as donors	P:GO:0055114; F:GO:0016491; F:GO:0051537	P:obsolete oxidation-reduction process; F:oxidoreductase activity; F:2 iron, 2 sulfur cluster binding	9118	3031.84	21143	1293	430.38	26.32	4.03138	1	409.38	-4.337	-409.403	DE - Mature
GZUJ98X01_(single)_trimmed_contig_8205	amp dependent	944	0	P:metabolic process; F:catalytic activity		P:GO:0008152; F:GO:0003824	P:metabolic process; F:catalytic activity	5829	633.375	14539	5760	97.5	38.63	1.33568	0.9	66.301	-1.642	-66.322	DE - Mature
GZUJ98X01_(single)_trimmed_contig_8213	lipoxygenase	211	7.06e-25	P:obsolete oxidation-reduction process; F:oxidoreductase activity, acting on single donors with incorporation of molecular oxygen, incorporation of two atoms of oxygen; F:metal ion binding	Acting on single donors with incorporation of molecular oxygen (oxygenases). The oxygen incorporated need not be derived from O(2)	P:GO:0055114; F:GO:0016702; F:GO:0046872	P:obsolete oxidation-reduction process; F:oxidoreductase activity, acting on single donors with incorporation of molecular oxygen, incorporation of two atoms of oxygen; F:metal ion binding	4674	2215.21	1320	6962	39.6	208.88	-2.3991	0.966	129.456	2.093	129.473	DE - Young
GZUJ98X01_(single)_trimmed_contig_8214	lipoxygenase	209	3.67e-24	P:obsolete oxidation-reduction process; F:oxidoreductase activity, acting on single donors with incorporation of molecular oxygen, incorporation of two atoms of oxygen; F:metal ion binding	Acting on single donors with incorporation of molecular oxygen (oxygenases). The oxygen incorporated need not be derived from O(2)	P:GO:0055114; F:GO:0016702; F:GO:0046872	P:obsolete oxidation-reduction process; F:oxidoreductase activity, acting on single donors with incorporation of molecular oxygen, incorporation of two atoms of oxygen; F:metal ion binding	9482	4515.22	4447	23868	134.7	722.97	-2.42419	0.966	450.439	2.118	450.444	DE - Young
GZUJ98X01_(single)_trimmed_contig_835	60s ribosomal protein l6	325	1.95e-36	P:RNA methylation; P:translation; F:structural constituent of ribosome; C:nucleolus; C:endoplasmic reticulum; C:plasma membrane; C:plasmodesma; C:chloroplast; C:cytosolic large ribosomal subunit		P:GO:0006412; F:GO:0003735; C:GO:0005622; C:GO:0005840	P:translation; F:structural constituent of ribosome; C:intracellular anatomical structure; C:ribosome	7027	2187.7	2510	16571	48.89	322.78	-2.72294	0.971	212.365	2.417	212.379	DE - Young
GZUJ98X01_(single)_trimmed_contig_8389	fructose-6-phosphate 2-kinase fructose- -bisphosphatase	359	6.88e-32	P:fructose metabolic process; P:fructose 6-phosphate metabolic process; P:fructose 2,6-bisphosphate metabolic process; P:metabolic process; P:phosphorylation; P:D-xylose metabolic process; P:regulation of carbon utilization; F:catalytic activity; F:6-phosphofructo-2-kinase activity; F:fructose-2,6-bisphosphate 2-phosphatase activity; F:ATP binding; F:kinase activity; F:hydrolase activity; F:carbo…		no IPS match	no IPS match	1958	554.694	4078	1462	71.91	25.78	1.47994	0.901	51.093	-1.786	-51.124	DE - Mature
GZUJ98X01_(single)_trimmed_contig_8418	germin precursor oxalate oxidase	278	1.89e-12	P:transition metal ion transport; P:biological_process; P:response to salt stress; F:manganese ion binding; F:nutrient reservoir activity; F:metal ion binding; C:plant-type vacuole; C:extracellular region; C:plasma membrane; C:apoplast		no GO terms	no GO terms	2298	835.263	1143	5641	26.03	128.46	-2.30307	0.965	77.938	1.997	77.964	DE - Young
GZUJ98X01_(single)_trimmed_contig_8419	germin-like protein 2-1-like	1131	3.24e-65	F:manganese ion binding; F:nutrient reservoir activity; F:metal ion binding; C:extracellular region		no GO terms	no GO terms	18405	1699.18	8456	47162	47.33	263.98	-2.4796	0.966	166.328	2.174	166.342	DE - Young
GZUJ98X01_(single)_trimmed_contig_8515	60s ribosomal protein l11	988	2.87e-114	P:translation; F:structural constituent of ribosome; C:ribosome		P:GO:0006412; F:GO:0003735; C:GO:0005622; C:GO:0005840	P:translation; F:structural constituent of ribosome; C:intracellular anatomical structure; C:ribosome	26660	2752.73	7061	69750	45.24	446.93	-3.30438	0.996	316.507	2.998	316.521	DE - Young
GZUJ98X01_(single)_trimmed_contig_8516	60s ribosomal protein l11	853	5.68e-115	P:RNA methylation; P:translation; F:structural constituent of ribosome; C:intracellular anatomical structure; C:nucleolus; C:cytoplasm; C:vacuole; C:Golgi apparatus; C:cytosol; C:ribosome; C:plasmodesma; C:chloroplast; C:membrane; C:cytosolic large ribosomal subunit; C:cytosolic ribosome; C:ribonucleoprotein complex		no GO terms	no GO terms	12715	1542.43	30332	7603	225.11	56.43	1.9961	0.966	179.595	-2.302	-179.61	DE - Mature
GZUJ98X01_(single)_trimmed_contig_9121	histone h3	264	2.89e-52	P:nucleosome assembly; F:DNA binding; F:protein heterodimerization activity; C:nucleosome		P:GO:0006334; F:GO:0003677; F:GO:0046982; C:GO:0000786	P:nucleosome assembly; F:DNA binding; F:protein heterodimerization activity; C:nucleosome	19191	7462.62	6552	34520	157.12	827.78	-2.39738	0.966	512.855	2.091	512.859	DE - Young
GZUJ98X01_(single)_trimmed_contig_916	beta-glucosidase 11-like	330	1.69e-32	P:carbohydrate metabolic process; P:anthocyanin-containing compound biosynthetic process; P:pigmentation; F:hydrolase activity, hydrolyzing O-glycosyl compounds; F:hexosyltransferase activity; C:plant-type vacuole		P:GO:0005975; F:GO:0004553	P:carbohydrate metabolic process; F:hydrolase activity, hydrolyzing O-glycosyl compounds	13244	3964.83	27412	9920	525.87	190.3	1.46643	0.901	372.189	-1.772	-372.193	DE - Mature
GZUJ98X01_(single)_trimmed_contig_917	beta-glucosidase 11-like	286	1.41e-18	P:carbohydrate metabolic process; F:hydrolase activity, hydrolyzing O-glycosyl compounds; C:cytoplasmic vesicle		P:GO:0005975; F:GO:0004553	P:carbohydrate metabolic process; F:hydrolase activity, hydrolyzing O-glycosyl compounds	5407	1904.28	11339	2465	250.99	54.56	2.20171	0.971	206.999	-2.508	-207.014	DE - Mature
GZUJ98X01_(single)_trimmed_contig_9254	predicted protein	814	5.66e-86	P:biological_process; F:molecular_function; C:cytosol		no GO terms	no GO terms	10432	1306.04	6410	23838	49.85	185.39	-1.8949	0.9	100.187	1.589	100.2	DE - Young
GZUJ98X01_(single)_trimmed_contig_93	myosin heavy chain	3179	6.06e-87	P:response to abscisic acid; P:response to cadmium ion; C:cytosol; C:plasma membrane		no GO terms	no GO terms	35516	1151.05	72578	20901	144.53	41.62	1.79602	0.966	110.941	-2.102	-110.961	DE - Mature
GZUJ98X01_(single)_trimmed_contig_9405	pyruvate kinase	1112	4.08e-180	P:glycolytic process; F:magnesium ion binding; F:pyruvate kinase activity; F:potassium ion binding	Pyruvate kinase	P:GO:0006096; F:GO:0000287; F:GO:0003824; F:GO:0004743; F:GO:0030955	P:glycolytic process; F:magnesium ion binding; F:catalytic activity; F:pyruvate kinase activity; F:potassium ion binding	8097	751.967	4474	17813	25.47	101.41	-1.99333	0.9	56.602	1.687	56.627	DE - Young
GZUJ98X01_(single)_trimmed_contig_94798	3-ketoacyl- synthase 11-like	411	6.39e-40	P:fatty acid biosynthetic process; P:response to stress; P:multicellular organism development; P:response to abiotic stimulus; P:cellular process; P:anatomical structure development; P:organic cyclic compound biosynthetic process; F:acyltransferase activity, transferring groups other than amino-acyl groups; C:intracellular organelle; C:obsolete cytoplasmic part		P:GO:0008152; P:GO:0008610; F:GO:0003824; F:GO:0016747	P:metabolic process; P:lipid biosynthetic process; F:catalytic activity; F:acyltransferase activity, transferring groups other than amino-acyl groups	3306	770.041	5503	21505	84.76	331.24	-1.96642	0.901	183.315	1.66	183.322	DE - Young
GZUJ98X01_(single)_trimmed_contig_94	cathepsin b-like	1529	8.71e-138	P:cell morphogenesis; P:proteolysis; P:fatty acid beta-oxidation; P:seed dormancy process; P:cell growth; P:Golgi vesicle transport; P:regulation of catalytic activity; F:cysteine-type endopeptidase activity; C:extracellular region; C:vacuole; C:cytosol	Acting on peptide bonds (peptidases)	no IPS match	no IPS match	16005	1079.83	33411	12138	138.33	50.26	1.46063	0.901	97.75	-1.767	-97.766	DE - Mature
GZUJ98X01_(single)_trimmed_contig_9626	tubulin beta-2 beta-3 chain	1545	0	P:microtubule-based process; F:structural constituent of cytoskeleton; F:GTP binding; C:microtubule		P:GO:0007017; F:GO:0005200; F:GO:0005525; C:GO:0005874	P:microtubule-based process; F:structural constituent of cytoskeleton; F:GTP binding; C:microtubule	24803	1638.58	12928	60411	52.97	247.53	-2.22436	0.904	147.367	1.918	147.379	DE - Young
GZUJ98X01_(single)_trimmed_contig_969	chlorophyll a b binding protein	1736	6.3e-79	P:photosynthesis, light harvesting; P:obsolete protein-chromophore linkage; P:cysteine biosynthetic process; P:metal ion transport; P:cellular cation homeostasis; P:response to karrikin; F:chlorophyll binding; F:metal ion binding; C:photosystem I; C:photosystem II; C:chloroplast thylakoid membrane; C:chloroplast envelope; C:plastoglobule; C:integral component of membrane; C:light-harvesting compl…		P:GO:0009765; C:GO:0016020	P:photosynthesis, light harvesting; C:membrane	71344	4304.24	141941	50069	517.61	182.59	1.50326	0.903	370.178	-1.809	-370.183	DE - Mature
GZUJ98X01_(single)_trimmed_contig_96	type iii chlorophyll a b-binding protein	824	1.69e-65	P:photosynthesis, light harvesting; P:obsolete protein-chromophore linkage; P:cysteine biosynthetic process; F:chlorophyll binding; F:metal ion binding; C:photosystem I; C:photosystem II; C:chloroplast thylakoid membrane; C:plastoglobule; C:integral component of membrane; C:light-harvesting complex		P:GO:0009765; C:GO:0016020	P:photosynthesis, light harvesting; C:membrane	156498	19401.5	392660	97768	3016.74	751.13	2.00586	0.966	2410.83	-2.312	-2410.83	DE - Mature
GZUJ98X01_(single)_trimmed_contig_9840	at1g56580 f25p12_18	1034	1.01e-54	P:trichome morphogenesis; P:cell wall biogenesis; C:cytoplasm; C:apoplast		no GO terms	no GO terms	21502	2152.98	6929	58251	42.42	356.64	-3.07165	0.989	246.245	2.766	246.26	DE - Young
GZUJ98X01_(single)_trimmed_contig_1020	phosphoenolpyruvate phosphate translocator precursor	400	1.08e-18	P:transport; F:transporter activity; C:plastid; C:membrane; C:integral component of membrane		no IPS match	no IPS match	10469	2581.2	1052	28860	16.65	456.76	-4.77784	1	353.079	4.472	353.107	DE - Young
GZUJ98X01_(single)_trimmed_contig_10364	protein hothead-like	2626	0	P:alcohol metabolic process; P:petal development; P:stamen development; P:plant ovule development; P:obsolete oxidation-reduction process; F:choline dehydrogenase activity; F:aldehyde-lyase activity; F:flavin adenine dinucleotide binding; C:chloroplast	Choline dehydrogenase	P:GO:0006066; P:GO:0055114; F:GO:0008812; F:GO:0016614; F:GO:0050660	P:alcohol metabolic process; P:obsolete oxidation-reduction process; F:choline dehydrogenase activity; F:oxidoreductase activity, acting on CH-OH group of donors; F:flavin adenine dinucleotide binding	5013	203.832	1836	11303	4.43	27.25	-2.62088	0.968	17.628	2.316	17.78	DE - Young
GZUJ98X01_(single)_trimmed_contig_10418	cyclin d3	1832	9.42e-89	P:mitotic cell cycle; P:organelle organization; P:response to hormone; P:post-embryonic development; P:tissue development; P:response to organic cyclic compound; P:cell cycle process; P:regulation of cellular metabolic process; P:animal organ development; P:cell division; P:regulation of cell cycle; P:regulation of macromolecule metabolic process; P:regulation of primary metabolic process; C:nucl…		P:GO:0007049; C:GO:0005634	P:cell cycle; C:nucleus	18091	1010.96	5571	40993	19.25	141.66	-2.8795	0.971	95.404	2.573	95.439	DE - Young
GZUJ98X01_(single)_trimmed_contig_106775	low quality protein: uncharacterized short-chain type dehydrogenase reductase y4vi-like	908	8.27e-27	P:obsolete oxidation-reduction process; F:oxidoreductase activity; C:extracellular region		no IPS match	no IPS match	608	67.51	162	2690	1.13	18.75	-4.0525	0.995	14.052	3.748	14.543	DE - Young
GZUJ98X01_(single)_trimmed_contig_10750	squamosa promoter-binding-like protein 12-like	2157	1.6e-90	P:regulation of biological process; F:DNA binding; C:nucleus; C:obsolete cytoplasmic part		F:GO:0003677; C:GO:0005634	F:DNA binding; C:nucleus	12568	604.846	6217	30424	18.25	89.29	-2.2906	0.903	54.022	1.985	54.058	DE - Young
GZUJ98X01_(single)_trimmed_contig_10790	pyrimidine-specific ribonucleoside hydrolase rihb	2669	0	F:hydrolase activity; C:cell wall; C:mitochondrion; C:cytoplasmic vesicle		no GO terms	no GO terms	6430	264.56	1647	15541	3.91	36.86	-3.23682	0.989	25.93	2.932	26.095	DE - Young
GZUJ98X01_(single)_trimmed_contig_10793	unknown	612	1.1e-47	P:cysteine biosynthetic process; P:obsolete oxidation-reduction process; F:oxidoreductase activity; C:mitochondrion; C:chloroplast thylakoid membrane; C:chloroplast inner membrane		no GO terms	no GO terms	3075	510.842	942	7209	9.74	74.57	-2.9366	0.989	50.614	2.63	50.682	DE - Young
GZUJ98X01_(single)_trimmed_contig_10795	glycine-rich protein	1838	0	P:amino acid transport; C:nucleus; C:cytoplasm; C:plasma membrane		no GO terms	no GO terms	6784	386.52	3449	14415	11.88	49.65	-2.06326	0.9	28.303	1.757	28.358	DE - Young
GZUJ98X01_(single)_trimmed_contig_10878	anthocyanidin -o-glucosyltransferase-like	1203	9.41e-86	P:metabolic process; F:UDP-glucosyltransferase activity		P:GO:0008152; F:GO:0016758	P:metabolic process; F:hexosyltransferase activity	2797	253.907	1398	6153	7.36	32.38	-2.13733	0.9	18.849	1.832	18.938	DE - Young
GZUJ98X01_(single)_trimmed_contig_10904	6-phosphogluconate dehydrogenase	713	6.48e-62	P:pentose-phosphate shunt; P:endoplasmic reticulum to Golgi vesicle-mediated transport; P:response to cold; P:response to water deprivation; P:response to salt stress; P:response to abscisic acid; P:response to sucrose; P:response to glucose; P:response to fructose; P:regulation of anion channel activity; P:D-gluconate metabolic process; P:amino acid import; F:phosphogluconate dehydrogenase (deca…	Phosphogluconate dehydrogenase (NADP(+)-dependent, decarboxylating)	P:GO:0006098; P:GO:0055114; F:GO:0004616	P:pentose-phosphate shunt; P:obsolete oxidation-reduction process; F:phosphogluconate dehydrogenase (decarboxylating) activity	1527	216.762	52	4383	0.46	38.92	-6.40273	0.999	31.04	6.091	31.632	DE - Young
GZUJ98X01_(single)_trimmed_contig_109458	alpha- -glucan-protein synthase	530	1.6e-47	P:cellulose biosynthetic process; P:UDP-L-arabinose metabolic process; P:cell wall organization; F:glycogenin glucosyltransferase activity; F:UDP-arabinopyranose mutase activity; C:extracellular region; C:cell wall; C:Golgi apparatus; C:cytosol; C:plasmodesma; C:membrane	UDP-arabinopyranose mutase; Glycogenin glucosyltransferase	P:GO:0030244; F:GO:0016866	P:cellulose biosynthetic process; F:intramolecular transferase activity	926	155.874	638	3021	7.62	36.08	-2.24334	0.902	21.584	1.937	21.671	DE - Young
GZUJ98X01_(single)_trimmed_contig_10995	probable pectinesterase 68-like	798	2.95e-43	P:obsolete histone phosphorylation; P:cell wall modification; F:pectinesterase activity; F:aspartyl esterase activity; C:extracellular region; C:plant-type cell wall; C:membrane	Pectinesterase	P:GO:0042545; F:GO:0030599; C:GO:0005618	P:cell wall modification; F:pectinesterase activity; C:cell wall	1123	144.003	328	3253	2.6	25.81	-3.31135	0.993	18.286	3.004	18.531	DE - Young
GZUJ98X01_(single)_trimmed_contig_11003	stress related-like protein interactor	323	1.11e-23	P:glucose catabolic process; P:D-xylose metabolic process; C:vacuolar membrane; C:endoplasmic reticulum; C:Golgi apparatus; C:plasma membrane; C:cytoplasmic vesicle		no GO terms	no GO terms	1019	318.325	560	2783	10.98	54.55	-2.3127	0.965	33.171	2.007	33.231	DE - Young
GZUJ98X01_(single)_trimmed_contig_11234	protein trichome birefringence-like 39	1822	7.02e-159	C:vacuole; C:plasmodesma		no GO terms	no GO terms	6321	361.327	2341	12724	8.13	44.21	-2.44305	0.964	27.648	2.136	27.731	DE - Young
GZUJ98X01_(single)_trimmed_contig_11322	di-glucose binding protein with kinesin motor domain	3169	0	P:microtubule cytoskeleton organization; P:cytokinesis by cell plate formation; P:DNA methylation; P:DNA methylation-dependent heterochromatin formation; P:microtubule-based movement; P:regulation of flower development; P:DNA integration; P:obsolete histone phosphorylation; P:small non-coding RNA-dependent heterochromatin formation; P:petal formation; P:sepal formation; P:histone H3-K9 methylatio…	Acting on acid anhydrides	P:GO:0007018; F:GO:0003777; F:GO:0005524; F:GO:0008017; C:GO:0005871	P:microtubule-based movement; F:microtubule motor activity; F:ATP binding; F:microtubule binding; C:kinesin complex	6843	237.272	2834	14609	5.66	29.18	-2.36611	0.962	17.959	2.06	18.077	DE - Young
GZUJ98X01_(single)_trimmed_contig_11405	protein	597	7.66e-113	P:photosystem II assembly; C:mitochondrion; C:chloroplast stroma		no GO terms	no GO terms	5048	847.43	2056	10550	21.8	111.87	-2.35942	0.965	68.743	2.053	68.774	DE - Young
GZUJ98X01_(single)_trimmed_contig_11589	hypothetical protein, partial	2186	1.43e-36	P:obsolete histone phosphorylation; P:regulation of cellular process; C:nucleus		no IPS match	no IPS match	7029	340.999	2132	16062	6.17	46.52	-2.91451	0.988	31.475	2.607	31.583	DE - Young
GZUJ98X01_(single)_trimmed_contig_11623	aldose 1-	1654	1.83e-77	P:galactose metabolic process; F:aldose 1-epimerase activity; F:carbohydrate binding; C:nucleus	Aldose 1-epimerase	P:GO:0005975; F:GO:0003824; F:GO:0016853; F:GO:0030246	P:carbohydrate metabolic process; F:catalytic activity; F:isomerase activity; F:carbohydrate binding	4381	277.008	2157	9684	8.26	37.07	-2.16604	0.901	21.742	1.861	21.822	DE - Young
GZUJ98X01_(single)_trimmed_contig_11791	gtp-binding protein 5-like	693	6.28e-11	F:GTP binding		F:GO:0005525	F:GTP binding	1351	198.364	562	2976	5.13	27.19	-2.40605	0.962	16.869	2.099	16.999	DE - Young
GZUJ98X01_(single)_trimmed_contig_12009	probable inactive receptor kinase at5g67200-like	2680	0	P:regionalization; P:protein phosphorylation; P:anatomical structure morphogenesis; P:cellular process; P:developmental process; P:meristem development; P:negative regulation of biological process; P:regulation of cellular process; F:protein kinase activity; F:ATP binding; C:plasma membrane		P:GO:0006468; F:GO:0004672; F:GO:0005524; F:GO:0016772	P:protein phosphorylation; F:protein kinase activity; F:ATP binding; F:transferase activity, transferring phosphorus-containing groups	4891	188.926	2340	12122	5.53	28.63	-2.37218	0.962	17.648	2.067	17.769	DE - Young
GZUJ98X01_(single)_trimmed_contig_12089	rna binding	346	5.04e-31	P:transport; F:organic cyclic compound binding; F:heterocyclic compound binding; C:plastid		P:GO:0006810; C:GO:0005622	P:transport; C:intracellular anatomical structure	539	152.624	269	1357	4.92	24.83	-2.33535	0.961	15.173	2.029	15.308	DE - Young
GZUJ98X01_(single)_trimmed_contig_12094	protein	1302	5.22e-90	P:organelle organization		no GO terms	no GO terms	3092	241.323	991	6425	4.82	31.24	-2.69629	0.969	20.467	2.391	20.606	DE - Young
GZUJ98X01_(single)_trimmed_contig_12161	dna replication licensing factor mcm3-like protein	314	4.97e-21	P:cytokinesis by cell plate formation; P:DNA unwinding involved in DNA replication; P:DNA replication initiation; P:regulation of DNA replication; P:DNA methylation; P:cell population proliferation; P:regulation of flower development; P:obsolete gene silencing; P:histone H3-K9 methylation; P:regulation of cell cycle; F:DNA binding; F:DNA helicase activity; F:ATP binding; F:ATP-dependent activity,…		no IPS match	no IPS match	1021	328.618	725	3924	14.62	79.11	-2.43592	0.965	49.414	2.13	49.46	DE - Young
GZUJ98X01_(single)_trimmed_contig_12439	loxc homologue	803	8.92e-149	P:response to wounding; P:response to fungus; P:jasmonic acid biosynthetic process; P:response to jasmonic acid; P:oxylipin biosynthetic process; P:obsolete oxidation-reduction process; F:iron ion binding; F:linoleate 13S-lipoxygenase activity; C:chloroplast thylakoid membrane; C:chloroplast stroma; C:chloroplast envelope	Linoleate 13S-lipoxygenase	P:GO:0055114; F:GO:0016702; F:GO:0046872	P:obsolete oxidation-reduction process; F:oxidoreductase activity, acting on single donors with incorporation of molecular oxygen, incorporation of two atoms of oxygen; F:metal ion binding	1480	196.427	752	3847	5.93	30.33	-2.35464	0.963	18.618	2.049	18.731	DE - Young
GZUJ98X01_(single)_trimmed_contig_12580	microtubule-associated protein rp eb family member 1-like	1187	6.33e-49	P:organelle organization; P:thigmotropism; C:cell wall; C:nucleolus; C:spindle; C:phragmoplast		no IPS match	no IPS match	2570	225.056	1027	6498	5.48	34.66	-2.66102	0.969	22.572	2.356	22.695	DE - Young
GZUJ98X01_(single)_trimmed_contig_12730	indole-3-acetic acid-amido synthetase	2052	0	P:response to light stimulus; P:response to auxin; P:response to brassinosteroid; P:response to cyclopentenone; P:secretion by cell; F:indole-3-acetic acid amido synthetase activity; C:plastid; C:cytoplasmic vesicle		no GO terms	no GO terms	7066	358.321	2212	21105	6.82	65.11	-3.25504	0.99	45.878	2.948	45.973	DE - Young
GZUJ98X01_(single)_trimmed_contig_12832	zinc finger ccch domain-containing protein 53-like	2663	0	F:nucleotide binding; F:nucleic acid binding; F:metal ion binding		F:GO:0000166; F:GO:0003676; F:GO:0046872	F:nucleotide binding; F:nucleic acid binding; F:metal ion binding	12670	512.152	6366	26002	15.13	61.81	-2.03043	0.9	34.893	1.724	34.936	DE - Young
GZUJ98X01_(single)_trimmed_contig_12956	momilactone a synthase-like	266	2.76e-38	P:obsolete oxidation-reduction process; F:3-oxoacyl-[acyl-carrier-protein] reductase (NADPH) activity	3-oxoacyl-[acyl-carrier-protein] reductase	no GO terms	no GO terms	318	123.308	66	938	1.57	22.32	-3.8295	0.995	16.499	3.523	16.871	DE - Young
GZUJ98X01_(single)_trimmed_contig_13021	transcription factor bhlh96-like	2105	4.41e-87	P:regulation of DNA-templated transcription; F:protein dimerization activity		F:GO:0046983	F:protein dimerization activity	9169	455.155	3828	17158	11.51	51.6	-2.16448	0.902	30.25	1.858	30.307	DE - Young
GZUJ98X01_(single)_trimmed_contig_13041	lin-54-like protein	2701	1.56e-102	P:microtubule cytoskeleton organization; P:DNA metabolic process; P:regulation of meristem structural organization; P:cell cycle process; P:heterochromatin formation; P:histone lysine methylation; P:floral organ morphogenesis; P:response to stimulus; P:regulation of cell division; C:nucleus		no GO terms	no GO terms	3407	137.434	1213	7647	2.84	17.92	-2.65761	0.963	11.664	2.35	11.898	DE - Young
GZUJ98X01_(single)_trimmed_contig_13131	condensin complex subunit 1	4070	0	P:cytokinesis; P:microtubule-based process; P:mitotic chromosome condensation; P:epidermal cell fate specification; F:binding; C:condensin complex; C:nucleus		P:GO:0000278; P:GO:0007076; P:GO:0030261; F:GO:0005488; C:GO:0005634	P:mitotic cell cycle; P:mitotic chromosome condensation; P:chromosome condensation; F:binding; C:nucleus	8197	212.79	3420	17007	5.32	26.45	-2.31377	0.962	16.09	2.008	16.215	DE - Young
GZUJ98X01_(single)_trimmed_contig_13209	ribonucleoside-diphosphate reductase small chain-like	1226	0	P:DNA-templated DNA replication; P:DNA repair; P:multicellular organism development; P:nucleotide biosynthetic process; P:deoxyribonucleoside diphosphate metabolic process; P:programmed cell death; P:regulation of cell cycle; P:obsolete oxidation-reduction process; F:ribonucleoside-diphosphate reductase activity, thioredoxin disulfide as acceptor; F:transition metal ion binding; C:ribonucleoside-…	Ribonucleoside-diphosphate reductase	no IPS match	no IPS match	8190	685.207	3876	19826	20.01	102.37	-2.355	0.965	62.843	2.049	62.876	DE - Young
GZUJ98X01_(single)_trimmed_contig_1325	two-component response regulator arr9-like	795	1.23e-49	P:regulation of cellular process		no GO terms	no GO terms	2991	381.182	775	7110	6.17	56.62	-3.19797	0.99	39.656	2.892	39.761	DE - Young
GZUJ98X01_(single)_trimmed_contig_13309	dna cytosine-5-methyltransferase	3107	0	P:cellular process; P:DNA methylation on cytosine; F:DNA binding; F:chromatin binding; F:methyltransferase activity		P:GO:0006306; F:GO:0003677; F:GO:0003682; F:GO:0008168	P:DNA methylation; F:DNA binding; F:chromatin binding; F:methyltransferase activity	6624	239.922	2206	14333	4.49	29.2	-2.70118	0.969	19.142	2.394	19.292	DE - Young
GZUJ98X01_(single)_trimmed_contig_13388	aldehyde dehydrogenase family 3 member f1	1798	1.45e-180	P:cellular aldehyde metabolic process; P:response to mechanical stimulus; P:calcium-mediated signaling; P:cellular response to water deprivation; P:obsolete oxidation-reduction process; F:3-chloroallyl aldehyde dehydrogenase activity; F:aldehyde dehydrogenase (NAD+) activity; F:aldehyde dehydrogenase [NAD(P)+] activity; C:endoplasmic reticulum; C:membrane	Aldehyde dehydrogenase (NAD(P)(+)); Aldehyde dehydrogenase (NAD(+)); Acting on the aldehyde or oxo group of donors	P:GO:0006081; P:GO:0008152; P:GO:0055114; F:GO:0004030; F:GO:0016491; F:GO:0016620	P:cellular aldehyde metabolic process; P:metabolic process; P:obsolete oxidation-reduction process; F:aldehyde dehydrogenase [NAD(P)+] activity; F:oxidoreductase activity; F:oxidoreductase activity, acting on the aldehyde or oxo group of donors, NAD or NADP as acceptor	5028	288.949	1325	11811	4.67	41.59	-3.15474	0.989	28.995	2.85	29.135	DE - Young
GZUJ98X01_(single)_trimmed_contig_13441	anthranilate synthase alpha subunit	481	1.16e-96	P:sulfate assimilation; P:tryptophan biosynthetic process; P:MAPK cascade; P:threonine catabolic process; P:tryptophan catabolic process; P:protein targeting to membrane; P:response to cold; P:response to water deprivation; P:detection of biotic stimulus; P:response to wounding; P:photomorphogenesis; P:indoleacetic acid biosynthetic process; P:salicylic acid biosynthetic process; P:response to et…	Anthranilate synthase; Sulfate adenylyltransferase	P:GO:0009058	P:biosynthetic process	2255	478.931	827	4770	10.88	62.78	-2.52863	0.966	39.928	2.222	39.989	DE - Young
GZUJ98X01_(single)_trimmed_contig_1349	sister chromatid cohesion protein pds5-like protein	404	6.47e-24	P:chromosome segregation; P:cell cycle process; P:multicellular organismal process; P:cellular macromolecule metabolic process; P:obsolete cellular process involved in reproduction; P:nucleic acid metabolic process; C:cytosol; C:chloroplast		no GO terms	no GO terms	1039	262.926	458	2774	7.18	43.47	-2.59796	0.965	28.005	2.293	28.099	DE - Young
GZUJ98X01_(single)_trimmed_contig_13564	protein	1552	9.2e-129	F:protein binding; C:chloroplast		no IPS match	no IPS match	2579	173.499	1179	6642	4.81	27.09	-2.49365	0.963	17.119	2.188	17.258	DE - Young
GZUJ98X01_(single)_trimmed_contig_13585	glutathione s-transferase	403	4.52e-25	P:toxin catabolic process; F:glutathione transferase activity; F:protein binding; F:glutathione binding; C:nucleus; C:vacuolar membrane; C:chloroplast stroma; C:thylakoid; C:chloroplast envelope; C:stromule	Glutathione transferase	F:GO:0005515	F:protein binding	1324	335.901	23	3118	0.36	48.98	-7.08805	0.999	39.287	6.777	39.868	DE - Young
GZUJ98X01_(single)_trimmed_contig_13852	tetratricopeptide repeat protein 7b-like	1365	1.27e-146	F:calmodulin binding; C:nucleus; C:plasma membrane		no IPS match	no IPS match	2164	170.998	795	4451	3.69	20.64	-2.48375	0.961	13.021	2.179	13.202	DE - Young
GZUJ98X01_(single)_trimmed_contig_13888	white-brown-complex abc transporter family	928	1.76e-161	P:obsolete ATP catabolic process; P:response to wounding; P:response to salt stress; P:response to abscisic acid; P:fatty acid transport; P:cutin transport; F:ATP binding; F:fatty acid transmembrane transporter activity; F:ABC-type phosphonate transporter activity; C:external side of plasma membrane	Acting on acid anhydrides	C:GO:0016020	C:membrane	2187	250.387	786	5796	5.36	39.54	-2.88301	0.988	26.641	2.577	26.765	DE - Young
GZUJ98X01_(single)_trimmed_contig_13980	dna binding	1308	1.56e-36	F:protein dimerization activity		F:GO:0046983	F:protein dimerization activity	1685	134.522	620	4289	3	20.76	-2.79077	0.966	13.801	2.484	14.023	DE - Young
GZUJ98X01_(single)_trimmed_contig_14105	amp dependent	413	1.07e-45	P:metabolic process; F:ligase activity		P:GO:0008152; F:GO:0003824	P:metabolic process; F:catalytic activity	658	162.823	278	2027	4.26	31.07	-2.8666	0.969	20.887	2.56	21.044	DE - Young
GZUJ98X01_(single)_trimmed_contig_14268	e3 ubiquitin-protein ligase orthrus 2-like	2650	0	P:nuclear division; P:double-strand break repair via homologous recombination; P:cytokinesis by cell plate formation; P:DNA replication initiation; P:regulation of DNA replication; P:nucleolus organization; P:cell population proliferation; P:pollen development; P:DNA methylation on cytosine within a CG sequence; P:somatic cell DNA recombination; P:protein ubiquitination; P:obsolete histone phosph…	Forming carbon-nitrogen bonds	F:GO:0005515; F:GO:0008270; F:GO:0042393; F:GO:0046872	F:protein binding; F:zinc ion binding; F:histone binding; F:metal ion binding	9538	390.701	4023	24387	9.61	58.26	-2.5999	0.966	37.542	2.294	37.612	DE - Young
GZUJ98X01_(single)_trimmed_contig_14273	zinc-finger domain of monoamine-oxidase a repressor r1 protein	1995	1.3e-107	C:nucleus		no GO terms	no GO terms	6357	340.596	2115	14257	6.71	45.24	-2.75321	0.97	29.906	2.447	30.006	DE - Young
GZUJ98X01_(single)_trimmed_contig_14281	cell elongation protein	544	5.24e-14	P:polysaccharide biosynthetic process; P:polysaccharide catabolic process; P:starch metabolic process; P:acetyl-CoA metabolic process; P:plant-type cell wall organization; P:lignin metabolic process; P:multidimensional cell growth; P:plant-type secondary cell wall biogenesis; P:cell tip growth; P:regulation of meristem growth; P:sterol biosynthetic process; P:brassinosteroid biosynthetic process;…	Acting on the CH-OH group of donors	no GO terms	no GO terms	1590	303.833	635	3162	7.39	36.8	-2.31606	0.964	22.392	2.01	22.482	DE - Young
GZUJ98X01_(single)_trimmed_contig_14318	protein	3965	7.16e-136	C:plasmodesma		no GO terms	no GO terms	8050	217.096	3682	17009	5.88	27.16	-2.2076	0.9	16.1	1.902	16.212	DE - Young
GZUJ98X01_(single)_trimmed_contig_14497	protein	2707	8.9e-140	P:nuclear division; P:cytokinesis by cell plate formation; P:acetyl-CoA metabolic process; P:translation; P:nucleolus organization; P:cell population proliferation; P:regulation of flower development; P:epidermal cell fate specification; P:obsolete gene silencing; P:histone lysine methylation; P:actin nucleation; P:spindle assembly; F:structural constituent of ribosome; C:nucleus; C:ribosome		P:GO:0006412; F:GO:0003735; C:GO:0005622; C:GO:0005840	P:translation; F:structural constituent of ribosome; C:intracellular anatomical structure; C:ribosome	4082	164.7	1405	8553	3.29	20	-2.60384	0.96	12.904	2.3	13.107	DE - Young
GZUJ98X01_(single)_trimmed_contig_14573	polygalacturonase inhibiting protein	236	6.61e-26	P:MAPK cascade; P:regulation of DNA-templated transcription; P:protein targeting to membrane; P:response to bacterium; P:jasmonic acid metabolic process; P:systemic acquired resistance, salicylic acid mediated signaling pathway; P:jasmonic acid mediated signaling pathway; P:regulation of hydrogen peroxide metabolic process; P:regulation of plant-type hypersensitive response; P:negative regulation…		F:GO:0005515	F:protein binding	1502	620.089	126	5447	3.38	146.11	-5.43389	1	114.896	5.128	115.011	DE - Young
GZUJ98X01_(single)_trimmed_contig_14583	protein	750	2.28e-38	P:response to auxin; P:response to karrikin; F:calcium ion binding		F:GO:0005509	F:calcium ion binding	3496	485.225	1561	8029	13.18	67.77	-2.3623	0.965	41.675	2.057	41.726	DE - Young
GZUJ98X01_(single)_trimmed_contig_14723	pore-forming toxin-like protein hfr-2	1610	7.19e-58	P:obsolete pathogenesis; C:extracellular region		no GO terms	no GO terms	11596	738.741	4869	24660	19.15	96.97	-2.34019	0.965	59.334	2.035	59.368	DE - Young
GZUJ98X01_(single)_trimmed_contig_14779	protein	440	2.58e-64	C:plant-type cell wall		no GO terms	no GO terms	1029	236.743	460	2272	6.62	32.69	-2.30395	0.963	19.839	1.998	19.939	DE - Young
GZUJ98X01_(single)_trimmed_contig_1483	kinesin-like protein	5769	0	P:microtubule-based movement; F:microtubule motor activity; F:ATP binding; F:microtubule binding; C:kinesin complex		P:GO:0007018; F:GO:0003777; F:GO:0005524; F:GO:0008017; C:GO:0005871	P:microtubule-based movement; F:microtubule motor activity; F:ATP binding; F:microtubule binding; C:kinesin complex	8155	146.215	2623	17535	2.88	19.24	-2.73997	0.965	12.696	2.435	12.927	DE - Young
GZUJ98X01_(single)_trimmed_contig_14848	multidrug pheromone mdr abc transporter family	1043	1.07e-142	P:obsolete ATP catabolic process; P:response to red or far red light; P:anatomical structure morphogenesis; P:epidermal cell differentiation; P:vernalization response; P:auxin export across the plasma membrane; P:basipetal auxin transport; P:acropetal auxin transport; P:regulation of cellular component size; P:anthocyanin accumulation in tissues in response to UV light; P:root development; P:carp…	Acting on acid anhydrides; Acting on acid anhydrides	F:GO:0000166; F:GO:0005524; F:GO:0016887; F:GO:0017111	F:nucleotide binding; F:ATP binding; F:ATP hydrolysis activity; F:ribonucleoside triphosphate phosphatase activity	2787	274.972	1241	5926	7.53	35.97	-2.25607	0.902	21.579	1.95	21.667	DE - Young
GZUJ98X01_(single)_trimmed_contig_14854	cyclin-dependent kinase b1-1	1222	0	P:protein phosphorylation; P:unidimensional cell growth; P:stomatal complex formation; P:DNA endoreduplication; P:cotyledon development; P:regulation of cell cycle; F:cyclin-dependent protein serine/threonine kinase activity; F:ATP binding; F:RNA polymerase II CTD heptapeptide repeat kinase activity; F:cyclin binding; C:cyclin-dependent protein kinase holoenzyme complex; C:nucleus; C:cytoplasm	[RNA-polymerase]-subunit kinase; Cyclin-dependent kinase	P:GO:0006468; F:GO:0004672; F:GO:0004674; F:GO:0005524; F:GO:0016772	P:protein phosphorylation; F:protein kinase activity; F:protein serine/threonine kinase activity; F:ATP binding; F:transferase activity, transferring phosphorus-containing groups	3824	320.48	1115	9098	5.78	47.13	-3.0275	0.988	32.373	2.723	32.487	DE - Young
GZUJ98X01_(single)_trimmed_contig_14948	transferring glycosyl	727	5.33e-14	P:protein glycosylation; F:galactosyltransferase activity; F:transferase activity; C:membrane		no GO terms	no GO terms	5192	729.242	1689	9746	14.71	84.87	-2.52846	0.966	53.981	2.223	54.027	DE - Young
GZUJ98X01_(single)_trimmed_contig_14984	transposase	1749	9.4e-68	F:nucleic acid binding; F:protein dimerization activity		F:GO:0003676; F:GO:0046983	F:nucleic acid binding; F:protein dimerization activity	3060	188.809	1121	5999	4.06	21.71	-2.41881	0.96	13.517	2.114	13.681	DE - Young
GZUJ98X01_(single)_trimmed_contig_15115	acyl-acp thioesterase	211	3.19e-23	P:fatty acid biosynthetic process; F:acyl carrier activity; F:oleoyl-[acyl-carrier-protein] hydrolase activity; F:myristoyl-[acyl-carrier-protein] hydrolase activity; F:palmitoyl-[acyl-carrier-protein] hydrolase activity; C:chloroplast	Oleoyl-[acyl-carrier-protein] hydrolase	P:GO:0006633; F:GO:0016790	P:fatty acid biosynthetic process; F:thiolester hydrolase activity	406	194.355	232	1834	6.96	55.03	-2.98306	0.989	37.577	2.677	37.672	DE - Young
GZUJ98X01_(single)_trimmed_contig_15121	atp binding	7800	0	P:cytokinesis; P:organelle organization; P:regulation of cellular process; F:nucleotide binding; F:microtubule motor activity; C:cytoplasm; C:microtubule associated complex		no IPS match	no IPS match	10802	142.091	3487	22201	2.83	18.02	-2.67073	0.963	11.754	2.365	11.989	DE - Young
GZUJ98X01_(single)_trimmed_contig_15284	subtilisin-like protease	2726	0	P:proteolysis; P:asymmetric cell division; P:negative regulation of catalytic activity; F:serine-type endopeptidase activity; F:identical protein binding; C:cell wall; C:cytoplasmic vesicle; C:apoplast	Acting on peptide bonds (peptidases)	P:GO:0006508; F:GO:0004252	P:proteolysis; F:serine-type endopeptidase activity	4200	159.675	2001	13401	4.65	31.12	-2.74254	0.969	20.542	2.438	20.686	DE - Young
GZUJ98X01_(single)_trimmed_contig_15316	sec14 cytosolic factor-like	1843	0	P:transport; P:sterol biosynthetic process; P:plant-type cell wall cellulose metabolic process; P:cell wall pectin metabolic process; F:transporter activity; C:nucleus; C:cytosol; C:plasma membrane; C:integral component of membrane		no IPS match	no IPS match	18114	1014.58	6233	36843	21.41	126.55	-2.56335	0.966	81.02	2.257	81.051	DE - Young
GZUJ98X01_(single)_trimmed_contig_15357	proteasome subunit beta type-3-b	305	1.72e-31	P:mitotic G2 phase; P:protein deneddylation; P:fatty acid beta-oxidation; P:photomorphogenesis; P:proteasome-mediated ubiquitin-dependent protein catabolic process; P:proteasome assembly; P:response to misfolded protein; F:threonine-type endopeptidase activity; C:nucleus; C:cytosol; C:proteasome core complex; C:plasma membrane; C:cytoplasmic vesicle	Acting on peptide bonds (peptidases)	P:GO:0051603; F:GO:0004175; F:GO:0004298; C:GO:0005839	P:proteolysis involved in protein catabolic process; F:endopeptidase activity; F:threonine-type endopeptidase activity; C:proteasome core complex	1942	659.862	1028	5007	21.34	103.93	-2.28398	0.904	62.775	1.978	62.806	DE - Young
GZUJ98X01_(single)_trimmed_contig_15398	pentatricopeptide repeat-containing protein	438	3.9e-19	P:protein deneddylation; P:pyrimidine ribonucleotide biosynthetic process; P:photomorphogenesis; F:RNA binding; C:nucleus; C:mitochondrion		no IPS match	no IPS match	918	208.815	488	2894	7.05	41.83	-2.56884	0.965	26.802	2.262	26.897	DE - Young
GZUJ98X01_(single)_trimmed_contig_15415	chromosome-associated kinesin	3808	0	P:DNA replication; P:obsolete covalent chromatin modification; P:heterochromatin formation; P:macromolecule methylation; P:anatomical structure development; F:nucleotide binding; F:microtubule motor activity; C:microtubule associated complex		no GO terms	no GO terms	9394	258.57	2785	19806	4.63	32.93	-2.83032	0.969	22.021	2.524	22.165	DE - Young
GZUJ98X01_(single)_trimmed_contig_15537	chalcone-flavanone isomerase family protein	933	4.65e-46	P:floral whorl development; P:floral organ formation; P:phyllome development; C:intracellular membrane-bounded organelle		no IPS match	no IPS match	2788	303.786	961	6680	6.52	45.33	-2.79752	0.97	30.165	2.491	30.268	DE - Young
GZUJ98X01_(single)_trimmed_contig_15570	membrane bound o-acyl transferase family protein	479	2.7e-76	P:intra-Golgi vesicle-mediated transport; P:autophagy; P:response to symbiotic fungus; P:obsolete animal organ senescence; P:cellular response to phosphate starvation; P:galactolipid biosynthetic process; P:triglyceride biosynthetic process; P:cellular response to water deprivation; F:1-acylglycerophosphocholine O-acyltransferase activity; F:lysophospholipid acyltransferase activity; C:extracellu…	1-acylglycerophosphocholine O-acyltransferase	no GO terms	no GO terms	3172	674.649	1420	7275	18.77	96.15	-2.35686	0.965	59.051	2.051	59.087	DE - Young
GZUJ98X01_(single)_trimmed_contig_15614	phenolic oxidative coupling protein	703	2.75e-34	P:defense response; P:response to biotic stimulus		no GO terms	no GO terms	2296	331.75	1077	4994	9.7	44.97	-2.21291	0.902	26.699	1.907	26.767	DE - Young
GZUJ98X01_(single)_trimmed_contig_15830	protein	2073	0	P:biological_process		no GO terms	no GO terms	3615	184.334	1149	7075	3.51	21.61	-2.62216	0.966	13.979	2.316	14.169	DE - Young
GZUJ98X01_(single)_trimmed_contig_15917	chaperone protein dnaj 6	370	6.01e-40	P:DNA-templated DNA replication; P:protein folding; P:purine nucleobase transport; P:response to stress; P:petal formation; P:sepal formation; F:heat shock protein binding; F:unfolded protein binding; C:nucleus; C:cytoplasm		no GO terms	no GO terms	983	267.781	387	2467	6.62	42.21	-2.67268	0.97	27.542	2.366	27.644	DE - Young
GZUJ98X01_(single)_trimmed_contig_16011	cinnamyl alcohol dehydrogenase-like protein	1290	1.09e-159	P:response to bacterium; P:plant-type hypersensitive response; P:lignin biosynthetic process; P:obsolete oxidation-reduction process; F:zinc ion binding; F:acyltransferase activity, transferring groups other than amino-acyl groups; F:aryl-alcohol dehydrogenase (NAD+) activity; F:cinnamyl-alcohol dehydrogenase activity; F:mannitol dehydrogenase activity	Mannitol dehydrogenase; Aryl-alcohol dehydrogenase; Cinnamyl-alcohol dehydrogenase	P:GO:0055114; F:GO:0008270; F:GO:0016491; F:GO:0016747	P:obsolete oxidation-reduction process; F:zinc ion binding; F:oxidoreductase activity; F:acyltransferase activity, transferring groups other than amino-acyl groups	5163	419.53	1688	12758	8.28	62.61	-2.91869	0.989	42.392	2.612	42.473	DE - Young
GZUJ98X01_(single)_trimmed_contig_16039	protein	515	1.66e-48	P:obsolete histone phosphorylation; C:mitochondrion; C:chloroplast		no GO terms	no GO terms	2018	404.466	1281	6038	15.75	74.22	-2.23646	0.903	44.324	1.931	44.366	DE - Young
GZUJ98X01_(single)_trimmed_contig_16069	replicon protein a2	540	8.09e-39	P:double-strand break repair via homologous recombination; P:cytokinesis by cell plate formation; P:DNA replication initiation; P:regulation of DNA replication; P:DNA methylation; P:cell population proliferation; P:pollen development; P:regulation of flower development; P:regulation of G2/M transition of mitotic cell cycle; P:somatic cell DNA recombination; P:gene silencing by RNA; P:histone H3-K…		no GO terms	no GO terms	1896	356.019	1275	171296	14.95	2008.17	-7.06959	1	1610.64	6.764	1610.66	DE - Young
GZUJ98X01_(single)_trimmed_contig_16113	dna polymerase alpha catalytic subunit	4469	0	P:DNA replication checkpoint signaling; P:double-strand break repair via homologous recombination; P:DNA synthesis involved in DNA repair; P:cytokinesis by cell plate formation; P:regionalization; P:DNA replication, synthesis of RNA primer; P:DNA replication initiation; P:lagging strand elongation; P:regulation of DNA replication; P:nucleotide-excision repair, DNA gap filling; P:double-strand bre…	Transferring phosphorus-containing groups; DNA-directed DNA polymerase	P:GO:0006139; P:GO:0006260; F:GO:0000166; F:GO:0001882; F:GO:0003676; F:GO:0003677; F:GO:0003887	P:nucleobase-containing compound metabolic process; P:DNA replication; F:nucleotide binding; F:nucleoside binding; F:nucleic acid binding; F:DNA binding; F:DNA-directed DNA polymerase activity	5982	140.081	2495	13229	3.53	18.74	-2.40838	0.958	11.633	2.101	11.821	DE - Young
GZUJ98X01_(single)_trimmed_contig_16133	kinesin-like protein kif22-like	2435	3.47e-135	P:organelle organization; P:microtubule-based process; P:regulation of biological process; F:binding; C:chloroplast		no GO terms	no GO terms	4392	200.175	1519	9175	3.95	23.85	-2.59406	0.962	15.357	2.289	15.527	DE - Young
GZUJ98X01_(single)_trimmed_contig_16156	condensin complex subunit 3-like	1661	0	P:mitotic chromosome condensation; P:response to heat; P:embryo development ending in seed dormancy; F:binding; C:condensin complex; C:nucleus; C:plasmodesma		P:GO:0007076; F:GO:0005488; C:GO:0000796	P:mitotic chromosome condensation; F:binding; C:condensin complex	2323	149.958	753	4791	2.87	18.26	-2.66956	0.963	11.909	2.364	12.142	DE - Young
GZUJ98X01_(single)_trimmed_contig_16158	condensin complex subunit 3-like	1499	0	P:mitotic chromosome condensation; P:response to heat; P:embryo development ending in seed dormancy; F:binding; C:condensin complex; C:nucleus; C:plasmodesma		P:GO:0007076; F:GO:0005488; C:GO:0000796	P:mitotic chromosome condensation; F:binding; C:condensin complex	2198	156.1	789	4025	3.33	17	-2.35194	0.956	10.426	2.045	10.624	DE - Young
GZUJ98X01_(single)_trimmed_contig_16175	lipid transfer protein	721	3.01e-33	P:transport; P:lipid transport; F:lipid binding		no IPS match	no IPS match	3309	479.061	1847	8234	16.22	72.3	-2.15622	0.903	42.295	1.85	42.336	DE - Young
GZUJ98X01_(single)_trimmed_contig_16201	b- -glucanase	1457	9.2e-106	P:carbohydrate metabolic process; F:beta-glucosidase activity	Beta-glucosidase	P:GO:0005975; F:GO:0004553	P:carbohydrate metabolic process; F:hydrolase activity, hydrolyzing O-glycosyl compounds	6153	438.721	2840	12953	12.34	56.28	-2.18928	0.903	33.21	1.883	33.264	DE - Young
GZUJ98X01_(single)_trimmed_contig_16313	glucan endo- -beta-glucosidase	2207	0	P:carbohydrate metabolic process; F:glucan endo-1,3-beta-D-glucosidase activity; F:cation binding; C:anchored component of plasma membrane	Glucan endo-1,3-beta-D-glucosidase	P:GO:0005975; F:GO:0004553	P:carbohydrate metabolic process; F:hydrolase activity, hydrolyzing O-glycosyl compounds	4646	222.274	2140	9987	6.14	28.65	-2.22222	0.9	17.047	1.917	17.154	DE - Young
GZUJ98X01_(single)_trimmed_contig_16452	ctp synthase	671	4.42e-52	P:endonucleolytic cleavage involved in rRNA processing; P:pyrimidine nucleotide biosynthetic process; P:embryo development ending in seed dormancy; P:response to cadmium ion; F:CTP synthase activity; C:cytosol; C:cytoplasmic vesicle	CTP synthase (glutamine hydrolyzing)	P:GO:0006221; F:GO:0003883	P:pyrimidine nucleotide biosynthetic process; F:CTP synthase activity	3874	611.699	1377	10633	12.99	100.32	-2.94914	0.989	68.206	2.643	68.258	DE - Young
GZUJ98X01_(single)_trimmed_contig_16556	myb-related protein 3r-1-like	1176	4.96e-53	P:cytokinesis by cell plate formation; P:regulation of DNA-templated transcription; P:organelle organization; P:response to hexose; P:regulation of DNA endoreduplication; P:floral whorl development; P:floral organ formation; P:phyllome development; F:DNA binding; F:DNA-binding transcription factor activity; F:transcription coactivator activity; C:nucleus		no IPS match	no IPS match	2625	238.395	996	5985	5.36	32.22	-2.58765	0.964	20.715	2.281	20.84	DE - Young
GZUJ98X01_(single)_trimmed_contig_16593	condensin complex components subunit	4193	0	P:cytokinesis by cell plate formation; P:DNA replication initiation; P:regulation of DNA replication; P:DNA repair; P:DNA methylation; P:DNA recombination; P:DNA methylation-dependent heterochromatin formation; P:transport; P:sister chromatid cohesion; P:mitotic chromosome condensation; P:cell population proliferation; P:regulation of flower development; P:ta-siRNA processing; P:regulation of G2/…		P:GO:0006281; P:GO:0006310; P:GO:0007076; P:GO:0051276; F:GO:0005515; F:GO:0005524; C:GO:0000796; C:GO:0005694	P:DNA repair; P:DNA recombination; P:mitotic chromosome condensation; P:chromosome organization; F:protein binding; F:ATP binding; C:condensin complex; C:chromosome	12465	309.784	4369	26199	6.6	39.56	-2.5835	0.965	25.419	2.278	25.521	DE - Young
GZUJ98X01_(single)_trimmed_contig_16663	auxin response factor 4	320	6.58e-42	P:regulation of DNA-templated transcription; P:auxin-activated signaling pathway; P:vegetative phase change; P:abaxial cell fate specification; F:DNA binding; F:DNA-binding transcription factor activity; F:protein dimerization activity; C:nucleus		P:GO:0006355; F:GO:0046983; C:GO:0005634	P:regulation of DNA-templated transcription; F:protein dimerization activity; C:nucleus	598	194.088	254	1521	5.02	30.09	-2.58352	0.964	19.329	2.276	19.463	DE - Young
GZUJ98X01_(single)_trimmed_contig_16836	atp binding	2757	0	P:microtubule cytoskeleton organization; P:cytokinesis by cell plate formation; P:DNA methylation; P:microtubule-based movement; P:regulation of flower development; P:obsolete histone phosphorylation; P:gene silencing by RNA; P:heterochromatin formation; P:petal formation; P:sepal formation; P:histone H3-K9 methylation; F:ATP binding; F:microtubule binding; F:minus-end-directed microtubule motor …	Acting on acid anhydrides	P:GO:0007018; F:GO:0003777; F:GO:0005524; F:GO:0008017; C:GO:0005871	P:microtubule-based movement; F:microtubule motor activity; F:ATP binding; F:microtubule binding; C:kinesin complex	5800	224.5	2093	13168	4.81	30.24	-2.65235	0.969	19.667	2.347	19.806	DE - Young
GZUJ98X01_(single)_trimmed_contig_16858	protein prolifera	1205	0	P:DNA unwinding involved in DNA replication; P:DNA replication initiation; P:DNA methylation; P:cell population proliferation; P:sugar mediated signaling pathway; P:heterochromatin formation; P:histone H3-K9 methylation; F:DNA binding; F:DNA helicase activity; F:protein binding; F:ATP binding; F:ATP-dependent activity, acting on DNA; C:nucleus; C:cytosol; C:MCM complex		P:GO:0006260; P:GO:0006270; F:GO:0003677; F:GO:0003678; F:GO:0005524; C:GO:0005634; C:GO:0042555	P:DNA replication; P:DNA replication initiation; F:DNA binding; F:DNA helicase activity; F:ATP binding; C:nucleus; C:MCM complex	6351	565.624	2316	13002	12.17	68.31	-2.48877	0.966	43.119	2.183	43.174	DE - Young
GZUJ98X01_(single)_trimmed_contig_16984	hypothetical protein VITISV_025472	1601	1.64e-57	P:microtubule cytoskeleton organization; P:cytokinesis by cell plate formation; P:biological_process; P:spindle assembly; F:molecular_function; C:nucleus		no GO terms	no GO terms	2695	181.481	951	5911	3.76	23.37	-2.63585	0.967	15.157	2.33	15.335	DE - Young
GZUJ98X01_(single)_trimmed_contig_17019	pollen ole e 1 allergen and extensin family protein	398	1.37e-46	P:biological_process; F:molecular_function		no GO terms	no GO terms	960	238.631	350	3555	5.57	56.55	-3.34378	0.996	40.203	3.038	40.317	DE - Young
GZUJ98X01_(single)_trimmed_contig_17047	fatty acyl- reductase 3-like	1080	1.04e-133	P:metabolic process; P:biosynthetic process; P:cellular process; F:fatty-acyl-CoA reductase (alcohol-forming) activity		F:GO:0080019	F:fatty-acyl-CoA reductase (alcohol-forming) activity	2352	221.387	410	5061	2.4	29.67	-3.6279	0.997	21.609	3.32	21.863	DE - Young
GZUJ98X01_(single)_trimmed_contig_17130	glucan endo- -beta-glucosidase	1307	4.29e-32	P:carbohydrate metabolic process; F:glucan endo-1,3-beta-D-glucosidase activity; F:cation binding	Glucan endo-1,3-beta-D-glucosidase	P:GO:0005975; F:GO:0004553	P:carbohydrate metabolic process; F:hydrolase activity, hydrolyzing O-glycosyl compounds	3556	277.865	1164	8488	5.64	41.11	-2.86572	0.97	27.639	2.56	27.757	DE - Young
GZUJ98X01_(single)_trimmed_contig_17148	protein	1098	2.86e-146	C:mitochondrion; C:chloroplast inner membrane		no GO terms	no GO terms	3520	334.136	1819	8925	10.49	51.46	-2.29444	0.903	31.16	1.989	31.223	DE - Young
GZUJ98X01_(single)_trimmed_contig_17227	microtubule-associated protein rp eb family member 1-like isoform 2	1441	9.93e-136	P:cytokinesis by cell plate formation; P:thigmotropism; P:positive gravitropism; P:vegetative to reproductive phase transition of meristem; F:microtubule binding; C:nucleus; C:microtubule organizing center; C:spindle microtubule; C:phragmoplast; C:preprophase band; C:cortical microtubule, transverse to long axis		no IPS match	no IPS match	2029	144.706	560	4397	2.46	19.32	-2.97336	0.984	13.175	2.667	13.442	DE - Young
GZUJ98X01_(single)_trimmed_contig_17237	aspartate carbamoyltransferase	753	1.34e-98	P:purine nucleotide biosynthetic process; P:'de novo' pyrimidine nucleobase biosynthetic process; P:cellular amino acid metabolic process; P:pyrimidine ribonucleotide biosynthetic process; P:cellular response to phosphate starvation; F:aspartate carbamoyltransferase activity; F:protein binding; F:amino acid binding; C:cytosol; C:chloroplast stroma	Aspartate carbamoyltransferase	P:GO:0006207; P:GO:0006520; F:GO:0004070; F:GO:0016597; F:GO:0016743	P:'de novo' pyrimidine nucleobase biosynthetic process; P:cellular amino acid metabolic process; F:aspartate carbamoyltransferase activity; F:amino acid binding; F:carboxyl- or carbamoyltransferase activity	1070	148.676	547	2715	4.6	22.83	-2.31123	0.96	13.875	2.005	14.019	DE - Young
GZUJ98X01_(single)_trimmed_contig_17249	pollen ole e 1 allergen and extensin family protein	397	9.38e-47	P:biological_process; F:molecular_function		no GO terms	no GO terms	820	205.607	612	2664	9.76	42.48	-2.12183	0.902	24.622	1.816	24.689	DE - Young
GZUJ98X01_(single)_trimmed_contig_17270	transcription factor ice1	2050	5.55e-149	P:stomatal lineage progression; P:developmental process; P:response to chemical; P:positive regulation of DNA-templated transcription; P:seed development; P:response to freezing; P:protein modification by small protein removal; F:DNA binding; F:amino acid binding; F:protein dimerization activity; C:nucleus		P:GO:0008152; F:GO:0016597; F:GO:0046983	P:metabolic process; F:amino acid binding; F:protein dimerization activity	8604	436.285	4233	19107	13.07	59	-2.17446	0.903	34.683	1.868	34.733	DE - Young
GZUJ98X01_(single)_trimmed_contig_17347	protein	776	7.56e-48	F:calcium ion binding		F:GO:0005509	F:calcium ion binding	1642	222.771	654	3576	5.34	29.17	-2.44957	0.963	18.276	2.145	18.402	DE - Young
GZUJ98X01_(single)_trimmed_contig_17359	cyclin	753	2.66e-53	P:regulation of cyclin-dependent protein serine/threonine kinase activity; P:cell division; F:protein kinase binding; C:nucleus		no IPS match	no IPS match	1405	196.752	444	3049	3.73	25.63	-2.78059	0.968	17.015	2.474	17.194	DE - Young
GZUJ98X01_(single)_trimmed_contig_17439	calmodulin binding	2011	1.34e-170	F:calmodulin binding; C:nucleus		F:GO:0005515	F:protein binding	5489	285.216	2016	12417	6.35	39.09	-2.62197	0.97	25.291	2.317	25.397	DE - Young
GZUJ98X01_(single)_trimmed_contig_17465	protein	1315	3.19e-153	P:metabolic process; P:Golgi vesicle transport; P:membrane fusion		no GO terms	no GO terms	8080	644.006	4243	19123	20.43	92.06	-2.17189	0.903	54.082	1.866	54.114	DE - Young
GZUJ98X01_(single)_trimmed_contig_17563	multidrug resistance	1035	6.19e-180	P:xenobiotic transmembrane transport; P:pollen development; P:flavonoid metabolic process; P:pollen tube growth; P:anther dehiscence; P:actin filament-based movement; F:antiporter activity; F:xenobiotic transmembrane transporter activity; C:vacuolar membrane; C:plasma membrane		P:GO:0006855; P:GO:0055085; F:GO:0015297; F:GO:0042910; C:GO:0016020	P:xenobiotic transmembrane transport; P:transmembrane transport; F:antiporter activity; F:xenobiotic transmembrane transporter activity; C:membrane	7048	689.929	2339	14850	14.31	90.83	-2.66615	0.971	59.21	2.361	59.257	DE - Young
GZUJ98X01_(single)_trimmed_contig_17564	multidrug resistance	507	2.39e-66	P:xenobiotic transmembrane transport; P:pollen development; P:flavonoid metabolic process; P:pollen tube growth; P:anther dehiscence; P:actin filament-based movement; F:antiporter activity; F:xenobiotic transmembrane transporter activity; C:vacuolar membrane; C:plasma membrane		P:GO:0006855; P:GO:0055085; F:GO:0015297; F:GO:0042910; C:GO:0016020	P:xenobiotic transmembrane transport; P:transmembrane transport; F:antiporter activity; F:xenobiotic transmembrane transporter activity; C:membrane	1348	278.525	509	3062	6.36	38.23	-2.58761	0.965	24.59	2.283	24.695	DE - Young
GZUJ98X01_(single)_trimmed_contig_17676	delta-1-pyrroline-5-carboxylate dehydrogenase 1 protein	787	1.62e-102	P:response to salt stress; P:proline catabolic process to glutamate; P:obsolete oxidation-reduction process; P:reactive oxygen species metabolic process; F:1-pyrroline-5-carboxylate dehydrogenase activity; F:3-chloroallyl aldehyde dehydrogenase activity; F:aldehyde dehydrogenase (NAD+) activity; F:zinc ion binding; F:cobalt ion binding; C:mitochondrion; C:chloroplast	Acting on the CH-NH group of donors; Aldehyde dehydrogenase (NAD(+)); Acting on the aldehyde or oxo group of donors	P:GO:0008152; P:GO:0055114; F:GO:0016491; F:GO:0016620	P:metabolic process; P:obsolete oxidation-reduction process; F:oxidoreductase activity; F:oxidoreductase activity, acting on the aldehyde or oxo group of donors, NAD or NADP as acceptor	3554	475.535	1926	8287	15.49	66.66	-2.10548	0.901	38.458	1.799	38.5	DE - Young
GZUJ98X01_(single)_trimmed_contig_17704	udp-glycosyltransferase 74e2-like	226	3.66e-30	P:shoot system morphogenesis; P:cellular response to water deprivation; P:cellular response to hydrogen peroxide; P:cellular response to abscisic acid stimulus; P:cellular hyperosmotic salinity response; P:indolebutyric acid metabolic process; P:response to karrikin; F:indole-3-butyrate beta-glucosyltransferase activity	Glycosyltransferases	no GO terms	no GO terms	603	260.434	295	1711	8.26	47.93	-2.53672	0.965	30.528	2.23	30.609	DE - Young
GZUJ98X01_(single)_trimmed_contig_17730	myb-related protein 3r-1-like	2417	0	P:cytokinesis by cell plate formation; P:regulation of DNA-templated transcription; F:DNA binding; F:chromatin binding; F:DNA-binding transcription factor activity; F:transcription coactivator activity; C:nucleus		F:GO:0003677; F:GO:0003682	F:DNA binding; F:chromatin binding	4980	219.216	1684	11154	4.41	29.21	-2.72761	0.969	19.235	2.422	19.387	DE - Young
GZUJ98X01_(single)_trimmed_contig_17970	inactive receptor kinase	973	8.72e-52	P:acetyl-CoA metabolic process; P:protein phosphorylation; P:microtubule nucleation; P:transmembrane receptor protein tyrosine kinase signaling pathway; P:pattern specification process; P:regulation of cell size; P:plant-type cell wall organization; P:auxin polar transport; P:root morphogenesis; P:regulation of meristem growth; P:sterol biosynthetic process; P:brassinosteroid biosynthetic process…	Transferring phosphorus-containing groups	F:GO:0005515	F:protein binding	1021	113.891	429	2577	2.79	16.77	-2.58755	0.957	10.779	2.281	11.018	DE - Young
GZUJ98X01_(single)_trimmed_contig_17991	hypothetical protein mapping: ARALYDRAFT_895556	7619	4e-11	P:biological_process; P:petal formation; P:sepal formation; F:molecular_function		no IPS match	no IPS match	22393	304.007	7455	45964	6.19	38.19	-2.62518	0.97	24.717	2.318	24.826	DE - Young
GZUJ98X01_(single)_trimmed_contig_17	rac-like gtp-binding protein arac7-like	1506	2.43e-100	P:obsolete GTP catabolic process; P:actin filament organization; P:small GTPase mediated signal transduction; P:protein transport; F:GTPase activity; F:sphingomyelin phosphodiesterase activity; F:GTP binding; C:extracellular region; C:cytoplasm; C:plasma membrane	Sphingomyelin phosphodiesterase	no IPS match	no IPS match	4809	329.952	2383	10545	10.02	44.33	-2.1454	0.902	25.858	1.84	25.924	DE - Young
GZUJ98X01_(single)_trimmed_contig_18002	proliferating cell nuclear antigen	571	2.93e-27	P:regulation of DNA replication; F:DNA binding; F:DNA polymerase processivity factor activity; C:nucleus; C:PCNA complex		P:GO:0006275; F:GO:0003677; F:GO:0030337; C:GO:0043626	P:regulation of DNA replication; F:DNA binding; F:DNA polymerase processivity factor activity; C:PCNA complex	988	169.349	517	3133	5.73	34.74	-2.59999	0.964	22.382	2.293	22.499	DE - Young
GZUJ98X01_(single)_trimmed_contig_18117	calcium-dependent phosphotriesterase-like protein	1646	5.97e-156	F:protein binding; C:extracellular region; C:endoplasmic reticulum		F:GO:0005515	F:protein binding	2105	131.927	1161	5762	4.47	22.16	-2.30961	0.96	13.471	2.005	13.619	DE - Young
GZUJ98X01_(single)_trimmed_contig_18313	anthranilate n-hydroxycinnamoyl benzoyltransferase	559	4.39e-31	F:transferase activity; F:acyltransferase activity, transferring groups other than amino-acyl groups		no IPS match	no IPS match	1781	299.462	592	7019	6.7	79.49	-3.56854	0.996	57.637	3.262	57.729	DE - Young
GZUJ98X01_(single)_trimmed_contig_18413	conserved peptide upstream open reading frame 47	1147	8.61e-98	P:biological_process; P:metabolic process; P:methylation; F:molecular_function; F:methyltransferase activity; C:extracellular region; C:mitochondrion		no GO terms	no GO terms	3638	333.223	1680	8304	9.27	45.83	-2.30565	0.964	27.822	1.999	27.894	DE - Young
GZUJ98X01_(single)_trimmed_contig_18517	chalcone synthase	1354	6.25e-104	P:biosynthetic process; P:response to stimulus; F:acyltransferase activity, transferring groups other than amino-acyl groups; C:intracellular membrane-bounded organelle		P:GO:0008152; P:GO:0009058; F:GO:0003824; F:GO:0016746; F:GO:0016747	P:metabolic process; P:biosynthetic process; F:catalytic activity; F:acyltransferase activity; F:acyltransferase activity, transferring groups other than amino-acyl groups	1842	140.66	615	4781	2.88	22.35	-2.95613	0.985	15.218	2.653	15.447	DE - Young
GZUJ98X01_(single)_trimmed_contig_18554	protein disulfide isomerase	329	4.98e-52	P:glycerol ether metabolic process; P:response to salt stress; P:embryo development; P:response to zinc ion; P:response to endoplasmic reticulum stress; P:regulation of programmed cell death; P:cell redox homeostasis; P:response to cadmium ion; P:seed development; F:dolichyl-diphosphooligosaccharide-protein glycotransferase activity; F:electron transfer activity; F:protein-disulfide reductase act…	Glycosyltransferases	P:GO:0045454	P:cell redox homeostasis	2457	742.678	1131	6633	21.76	127.63	-2.55222	0.966	81.539	2.246	81.57	DE - Young
GZUJ98X01_(single)_trimmed_contig_18575	branched-chain amino acid	1447	1.48e-155	P:branched-chain amino acid metabolic process; P:toxin catabolic process; P:response to sucrose; P:response to fructose; F:L-leucine transaminase activity; F:L-valine transaminase activity; F:L-isoleucine transaminase activity; C:nucleus; C:mitochondrion; C:chloroplast	Branched-chain-amino-acid transaminase	no IPS match	no IPS match	4037	287.648	1724	10012	7.54	43.8	-2.53829	0.965	27.91	2.232	27.999	DE - Young
GZUJ98X01_(single)_trimmed_contig_18672	probable glycosyltransferase at5g03795-like	1471	0	P:metabolic process; F:glucuronosyl-N-acetylglucosaminyl-proteoglycan 4-alpha-N-acetylglucosaminyltransferase activity; C:Golgi apparatus; C:membrane	Glucuronosyl-N-acetylglucosaminyl-proteoglycan 4-alpha-N-	no GO terms	no GO terms	2500	178.873	933	4993	4.02	21.49	-2.4184	0.96	13.376	2.114	13.542	DE - Young
GZUJ98X01_(single)_trimmed_contig_18737	interactor of constitutive active rops chloroplastic-like	290	6.71e-34	P:regulation of cell population proliferation; C:extracellular region; C:plasma membrane; C:chloroplast		no GO terms	no GO terms	1332	457.276	344	2856	7.51	62.35	-3.0535	0.989	42.954	2.748	43.042	DE - Young
GZUJ98X01_(single)_trimmed_contig_18797	sulfite reductase	293	2.65e-21	P:glycolytic process; P:water transport; P:hyperosmotic response; P:Golgi organization; P:response to cold; P:response to salt stress; P:indoleacetic acid biosynthetic process; P:sterol biosynthetic process; P:cysteine biosynthetic process; P:sulfate reduction; P:glucosinolate biosynthetic process; P:response to cadmium ion; F:copper ion binding; F:sulfite reductase activity; F:heme binding; F:su…	Assimilatory sulfite reductase (ferredoxin); Deleted entry	no GO terms	no GO terms	1193	413.16	616	2830	13.31	61.15	-2.19984	0.903	36.178	1.894	36.228	DE - Young
GZUJ98X01_(single)_trimmed_contig_18875	short chain alcohol	1127	7.35e-93	P:obsolete oxidation-reduction process; F:oxidoreductase activity, acting on the CH-OH group of donors, NAD or NADP as acceptor		P:GO:0008152; F:GO:0016491	P:metabolic process; F:oxidoreductase activity	1864	170.13	979	5312	5.5	29.84	-2.43974	0.963	18.651	2.134	18.773	DE - Young
GZUJ98X01_(single)_trimmed_contig_18910	polyneuridine-aldehyde esterase-like	924	2.35e-63	P:protein targeting to membrane; P:water transport; P:systemic acquired resistance; P:response to salt stress; P:salicylic acid metabolic process; P:response to fructose; P:positive regulation of flavonoid biosynthetic process; P:regulation of plant-type hypersensitive response; P:cysteine biosynthetic process; P:defense response to fungus; F:methyl indole-3-acetate esterase activity; F:methyl sa…	Acting on ester bonds	no IPS match	no IPS match	1219	133.819	364	2923	2.49	20.03	-3.00794	0.984	13.716	2.7	13.979	DE - Young
GZUJ98X01_(single)_trimmed_contig_18947	piriformospora indica-insensitive protein 2-like	2153	1.28e-169	P:response to molecule of bacterial origin; P:signal transduction; P:metabolic process; P:response to symbiotic fungus; P:stomatal complex morphogenesis; P:biological process involved in symbiotic interaction; P:stamen development; F:oxidoreductase activity; C:plasma membrane; C:chloroplast		no GO terms	no GO terms	3747	185.215	1165	7561	3.43	22.23	-2.69623	0.966	14.569	2.392	14.764	DE - Young
GZUJ98X01_(single)_trimmed_contig_18989	cytochrome p450	2053	0	P:fatty acid metabolic process; P:obsolete oxidation-reduction process; F:iron ion binding; F:protein binding; F:electron transfer activity; F:alkane 1-monooxygenase activity; F:oxygen binding; F:heme binding; F:aromatase activity; C:extracellular region	Alkane 1-monooxygenase; Unspecific monooxygenase	P:GO:0055114; F:GO:0005506; F:GO:0016705; F:GO:0020037	P:obsolete oxidation-reduction process; F:iron ion binding; F:oxidoreductase activity, acting on paired donors, with incorporation or reduction of molecular oxygen; F:heme binding	3008	151.699	2249	9882	6.94	30.47	-2.13438	0.9	17.727	1.83	17.821	DE - Young
GZUJ98X01_(single)_trimmed_contig_19390	mitotic spindle checkpoint protein mad2	1234	3.36e-136	P:mitotic spindle assembly checkpoint signaling; P:cell population proliferation; P:obsolete histone phosphorylation; P:DNA endoreduplication; P:proteasome-mediated ubiquitin-dependent protein catabolic process; P:proteasome assembly; P:pollen sperm cell differentiation; P:cell division; P:regulation of unidimensional cell growth; P:response to misfolded protein; F:DNA binding; F:protein binding;…		P:GO:0007094	P:mitotic spindle assembly checkpoint signaling	2009	166.012	583	4895	2.99	25.11	-3.07004	0.986	17.335	2.764	17.554	DE - Young
GZUJ98X01_(single)_trimmed_contig_19418	gdsl esterase lipase	1757	3.96e-161	P:lipid metabolic process; P:response to stimulus; F:lipase activity; F:carboxylic ester hydrolase activity; C:nucleus; C:apoplast	Carboxylesterase; Acting on ester bonds	P:GO:0006629; F:GO:0016787; F:GO:0016788	P:lipid metabolic process; F:hydrolase activity; F:hydrolase activity, acting on ester bonds	22191	1294.09	4913	54379	17.7	195.93	-3.46852	0.996	140.892	3.162	140.927	DE - Young
GZUJ98X01_(single)_trimmed_contig_19420	protein	3001	0	P:respiratory burst involved in defense response; P:glutamine biosynthetic process; P:tryptophan catabolic process; P:nitrogen fixation; P:response to bacterium; P:indoleacetic acid biosynthetic process; P:response to abscisic acid; P:response to chitin; P:lateral root formation; P:root cap development; F:glutamate-ammonia ligase activity; F:microtubule binding; F:gamma-tubulin binding; F:protein…	Glutamine synthetase	P:GO:0006542; P:GO:0006807; P:GO:0008152; F:GO:0003824; F:GO:0004356	P:glutamine biosynthetic process; P:nitrogen compound metabolic process; P:metabolic process; F:catalytic activity; F:glutamate-ammonia ligase activity	5368	195.561	1536	11932	3.24	25.17	-2.95764	0.986	17.133	2.652	17.337	DE - Young
GZUJ98X01_(single)_trimmed_contig_19527	tetrahydroxychalcone glucosyltransferase	314	4.68e-19	P:metabolic process; F:anthocyanidin 3-O-glucosyltransferase activity	Anthocyanidin 3-O-glucosyltransferase	no GO terms	no GO terms	788	254.452	589	2547	11.87	51.35	-2.11304	0.902	29.685	1.807	29.74	DE - Young
GZUJ98X01_(single)_trimmed_contig_1956	endo-beta- -glucanase	366	7.78e-14	P:carbohydrate metabolic process; F:hydrolase activity, hydrolyzing O-glycosyl compounds		P:GO:0005975; F:GO:0003824; F:GO:0004553	P:carbohydrate metabolic process; F:catalytic activity; F:hydrolase activity, hydrolyzing O-glycosyl compounds	646	172.658	698	3772	12.07	65.24	-2.43433	0.965	40.732	2.128	40.788	DE - Young
GZUJ98X01_(single)_trimmed_contig_19832	endoxyloglucan transferase	1246	1.43e-139	P:cellular glucan metabolic process; P:plant-type cell wall modification involved in multidimensional cell growth; P:anatomical structure development; F:hydrolase activity, hydrolyzing O-glycosyl compounds; F:xyloglucan:xyloglucosyl transferase activity; C:cell wall; C:integral component of plasma membrane; C:apoplast	Xyloglucan:xyloglucosyl transferase	P:GO:0005975; P:GO:0006073; F:GO:0004553; F:GO:0016762; C:GO:0005618; C:GO:0048046	P:carbohydrate metabolic process; P:cellular glucan metabolic process; F:hydrolase activity, hydrolyzing O-glycosyl compounds; F:xyloglucan:xyloglucosyl transferase activity; C:cell wall; C:apoplast	1645	139.086	598	4613	3.04	23.44	-2.94683	0.985	15.932	2.642	16.15	DE - Young
GZUJ98X01_(single)_trimmed_contig_19882	chromosome-associated kinesin	388	1.92e-35	P:microtubule-based movement; F:microtubule motor activity; F:ATP binding; F:microtubule binding; C:kinesin complex; C:microtubule		P:GO:0007018; F:GO:0003777; F:GO:0005524; F:GO:0008017	P:microtubule-based movement; F:microtubule motor activity; F:ATP binding; F:microtubule binding	492	129.497	159	1136	2.59	18.54	-2.83962	0.965	12.408	2.531	12.663	DE - Young
GZUJ98X01_(single)_trimmed_contig_19891	cop1-interacting protein	605	9.92e-56	C:plasma membrane		no GO terms	no GO terms	887	150.425	301	1896	3.15	19.84	-2.65499	0.965	12.908	2.349	13.12	DE - Young
GZUJ98X01_(single)_trimmed_contig_19909	binding calmodulin binding protein	3435	0	P:organelle organization; P:gene silencing by RNA; P:heterochromatin formation		no GO terms	no GO terms	5202	159.947	2108	11326	3.89	20.87	-2.42359	0.96	13.009	2.12	13.181	DE - Young
GZUJ98X01_(single)_trimmed_contig_19926	condensin complex	541	1.84e-14	P:mitotic chromosome condensation; C:condensin complex		P:GO:0007076; C:GO:0000796	P:mitotic chromosome condensation; C:condensin complex	970	194.713	399	2109	4.67	24.68	-2.40185	0.961	15.305	2.096	15.448	DE - Young
GZUJ98X01_(single)_trimmed_contig_19962	protein	384	3.16e-20	P:vernalization response; F:DNA binding; C:cytoplasm		F:GO:0003677	F:DNA binding	757	203.799	341	1840	5.62	30.33	-2.4321	0.963	18.93	2.126	19.049	DE - Young
GZUJ98X01_(single)_trimmed_contig_20056	dna replication licensing factor mcm4	1389	0	P:nuclear division; P:cytokinesis by cell plate formation; P:DNA unwinding involved in DNA replication; P:DNA replication initiation; P:regulation of DNA replication; P:DNA methylation; P:nucleolus organization; P:cell population proliferation; P:nucleotide biosynthetic process; P:regulation of flower development; P:heterochromatin formation; P:histone H3-K9 methylation; P:regulation of cell cycl…		P:GO:0006260; P:GO:0006270; F:GO:0003677; F:GO:0003678; F:GO:0005524; C:GO:0042555	P:DNA replication; P:DNA replication initiation; F:DNA binding; F:DNA helicase activity; F:ATP binding; C:MCM complex	3889	294.908	1835	8668	8.36	39.51	-2.24064	0.902	23.611	1.934	23.69	DE - Young
GZUJ98X01_(single)_trimmed_contig_20057	dna replication licensing factor mcm4	956	0	P:nuclear division; P:cytokinesis by cell plate formation; P:DNA unwinding involved in DNA replication; P:DNA replication initiation; P:regulation of DNA replication; P:DNA methylation; P:nucleolus organization; P:cell population proliferation; P:nucleotide biosynthetic process; P:regulation of flower development; P:heterochromatin formation; P:histone H3-K9 methylation; P:regulation of cell cycl…		P:GO:0006260; P:GO:0006270; F:GO:0003677; F:GO:0003678; F:GO:0005524; C:GO:0042555	P:DNA replication; P:DNA replication initiation; F:DNA binding; F:DNA helicase activity; F:ATP binding; C:MCM complex	3223	355.058	1406	6956	9.31	46.06	-2.30666	0.964	27.97	2.001	28.042	DE - Young
GZUJ98X01_(single)_trimmed_contig_20120	predicted protein	323	6.15e-11	P:metabolic process; F:oxidoreductase activity, acting on CH-OH group of donors		no GO terms	no GO terms	960	300.195	295	2058	5.78	40.34	-2.80307	0.97	26.866	2.497	26.981	DE - Young
GZUJ98X01_(single)_trimmed_contig_20170	acyltransferase-like protein	1107	3.07e-167	P:triglyceride biosynthetic process; P:phytol metabolic process; F:diacylglycerol O-acyltransferase activity; C:plastoglobule	Diacylglycerol O-acyltransferase	F:GO:0016747	F:acyltransferase activity, transferring groups other than amino-acyl groups	3572	333.08	1433	7699	8.19	44.03	-2.42655	0.964	27.44	2.12	27.522	DE - Young
GZUJ98X01_(single)_trimmed_contig_20290	hmg high mobility group box protein	1575	2.38e-83	P:microtubule cytoskeleton organization; P:cytokinesis by cell plate formation; P:acetyl-CoA metabolic process; P:response to cyclopentenone; P:obsolete histone phosphorylation; P:regulation of cell population proliferation; F:DNA binding; F:DNA-binding transcription factor activity; C:nucleus		no GO terms	no GO terms	8674	565.031	2014	19066	8.1	76.63	-3.24192	0.99	53.934	2.937	54.014	DE - Young
GZUJ98X01_(single)_trimmed_contig_20300	sodium transporter hkt1-like	2088	1.65e-144	P:metal ion transport; P:transmembrane transport; P:inorganic cation transmembrane transport; F:cation transmembrane transporter activity; C:membrane		P:GO:0006812; P:GO:0055085; F:GO:0008324	P:cation transport; P:transmembrane transport; F:cation transmembrane transporter activity	4414	218.307	1444	8607	4.38	26.1	-2.57505	0.963	16.743	2.27	16.896	DE - Young
GZUJ98X01_(single)_trimmed_contig_2032	tropinone reductase	432	2.2e-40	P:metabolic process; F:oxidoreductase activity		P:GO:0008152; F:GO:0016491	P:metabolic process; F:oxidoreductase activity	1180	283.28	534	2524	7.83	36.99	-2.24005	0.902	22.11	1.935	22.195	DE - Young
GZUJ98X01_(single)_trimmed_contig_20403	heat shock protein 83	401	8.42e-40	P:protein folding; P:response to heat; P:response to high light intensity; P:response to hydrogen peroxide; P:defense response to bacterium; P:response to arsenic-containing substance; F:ATP binding; F:unfolded protein binding; C:cell wall; C:cytosol; C:plasma membrane		no IPS match	no IPS match	499	133.439	141	1198	2.23	18.91	-3.08403	0.984	13.082	2.781	13.375	DE - Young
GZUJ98X01_(single)_trimmed_contig_20423	axial regulator yabby 1	1441	6.58e-79	P:regionalization; P:organelle organization; P:post-embryonic animal morphogenesis; P:animal organ morphogenesis; P:cell fate commitment; P:seed development; P:floral organ development; P:meristem development; P:regulation of biological process		no GO terms	no GO terms	2968	214.09	808	7041	3.55	30.93	-3.12312	0.988	21.488	2.817	21.671	DE - Young
GZUJ98X01_(single)_trimmed_contig_20500	aspartic proteinase	1482	0	P:glycolytic process; P:proteolysis; P:protein targeting to vacuole; P:lipid metabolic process; P:water transport; P:hyperosmotic response; P:Golgi organization; P:response to temperature stimulus; P:response to salt stress; P:response to cadmium ion; P:animal organ development; F:aspartic-type endopeptidase activity; C:extracellular region; C:vacuole; C:endoplasmic reticulum; C:cytosol; C:plasmo…	Acting on peptide bonds (peptidases)	P:GO:0006508; P:GO:0006629; F:GO:0004190	P:proteolysis; P:lipid metabolic process; F:aspartic-type endopeptidase activity	7555	513.445	3258	15938	13.92	68.08	-2.29007	0.903	41.185	1.984	41.233	DE - Young
GZUJ98X01_(single)_trimmed_contig_20552	homeobox-leucine zipper protein roc3-like	3106	0	P:regulation of DNA-templated transcription; F:DNA-binding transcription factor activity; F:lipid binding; F:sequence-specific DNA binding; C:nucleus		P:GO:0006355; F:GO:0003677; F:GO:0003700; F:GO:0008289; F:GO:0043565; C:GO:0005634	P:regulation of DNA-templated transcription; F:DNA binding; F:DNA-binding transcription factor activity; F:lipid binding; F:sequence-specific DNA binding; C:nucleus	3649	128.077	1521	9296	3.1	18.95	-2.61186	0.96	12.235	2.306	12.451	DE - Young
GZUJ98X01_(single)_trimmed_contig_20553	cytochrome p450 86b1-like	2038	0	P:suberin biosynthetic process; P:very long-chain fatty acid biosynthetic process; P:obsolete oxidation-reduction process; F:iron ion binding; F:electron transfer activity; F:heme binding; F:aromatase activity; C:endoplasmic reticulum	Unspecific monooxygenase	P:GO:0055114; F:GO:0005506; F:GO:0016705; F:GO:0020037	P:obsolete oxidation-reduction process; F:iron ion binding; F:oxidoreductase activity, acting on paired donors, with incorporation or reduction of molecular oxygen; F:heme binding	5394	277.594	858	12715	2.67	39.5	-3.88694	0.998	29.305	3.583	29.523	DE - Young
GZUJ98X01_(single)_trimmed_contig_20683	aquaporin tip4-1-like	1234	3.48e-100	P:transport; P:biological_process; F:transporter activity; C:membrane		P:GO:0006810; F:GO:0005215; C:GO:0016020	P:transport; F:transporter activity; C:membrane	3098	258.208	1543	6862	7.92	35.2	-2.152	0.901	20.575	1.847	20.658	DE - Young
GZUJ98X01_(single)_trimmed_contig_20861	kinesin-like protein kif11-like	3285	0	P:microtubule cytoskeleton organization; P:cytokinesis by cell plate formation; P:DNA methylation-dependent heterochromatin formation; P:microtubule-based movement; P:regulation of flower development; P:small non-coding RNA-dependent heterochromatin formation; P:petal formation; P:sepal formation; P:histone H3-K9 methylation; F:microtubule motor activity; F:ATP binding; F:microtubule binding; C:k…		P:GO:0007018; F:GO:0003777; F:GO:0005524; F:GO:0008017; C:GO:0005871	P:microtubule-based movement; F:microtubule motor activity; F:ATP binding; F:microtubule binding; C:kinesin complex	4542	151.829	1403	10321	2.7	19.89	-2.88101	0.966	13.395	2.573	13.64	DE - Young
GZUJ98X01_(single)_trimmed_contig_20887	polygalacturonase-inhibiting protein	1430	2.07e-87	C:extracellular region; C:cell wall; C:apoplast		no GO terms	no GO terms	5969	436.405	2087	16325	9.24	72.27	-2.96743	0.989	49.257	2.662	49.329	DE - Young
GZUJ98X01_(single)_trimmed_contig_20997	protein hothead-like	887	5.04e-167	P:alcohol metabolic process; P:cell-cell signaling; P:embryo sac development; P:fatty acid omega-oxidation; F:choline dehydrogenase activity; F:mandelonitrile lyase activity; F:flavin adenine dinucleotide binding; C:extracellular region	(R)-mandelonitrile lyase; Choline dehydrogenase	P:GO:0055114; F:GO:0016614; F:GO:0050660	P:obsolete oxidation-reduction process; F:oxidoreductase activity, acting on CH-OH group of donors; F:flavin adenine dinucleotide binding	3069	350.829	1078	8087	7.69	57.72	-2.90802	0.989	39.023	2.601	39.11	DE - Young
GZUJ98X01_(single)_trimmed_contig_21020	cytidine deoxycytidylate deaminase family protein	379	7.93e-43	P:metabolic process; F:zinc ion binding; F:guanine deaminase activity; C:cytosol	Guanine deaminase	F:GO:0003824; F:GO:0008270; F:GO:0016787	F:catalytic activity; F:zinc ion binding; F:hydrolase activity	580	162.689	263	1589	4.39	26.54	-2.59588	0.963	17.089	2.289	17.242	DE - Young
GZUJ98X01_(single)_trimmed_contig_21094	2-alkenal reductase nadp+dependent-like	1512	0	P:carbohydrate metabolic process; P:obsolete oxidation-reduction process; F:nucleotide binding; F:polygalacturonase activity; F:zinc ion binding; F:2-alkenal reductase [NAD(P)+] activity; C:extracellular region	2-alkenal reductase (NAD(P)(+)); Endo-polygalacturonase	no IPS match	no IPS match	2443	166.496	853	4768	3.57	19.96	-2.48312	0.96	12.586	2.177	12.773	DE - Young
GZUJ98X01_(single)_trimmed_contig_21280	subtilisin-like protease-like	563	1.41e-18	P:proteolysis; P:negative regulation of catalytic activity; F:serine-type endopeptidase activity; F:identical protein binding; C:extracellular region; C:membrane	Acting on peptide bonds (peptidases)	no IPS match	no IPS match	2187	406.321	1018	5708	11.45	64.18	-2.48678	0.966	40.501	2.181	40.56	DE - Young
GZUJ98X01_(single)_trimmed_contig_21393	rhodanese-like domain-containing protein mitochondrial-like	680	1.82e-55	P:iron ion transport; P:aging; P:cellular response to iron ion starvation; P:response to nitrate; P:regulation of anion channel activity; P:nitrate transmembrane transport; P:root hair elongation; C:cytoplasm		no GO terms	no GO terms	5496	848.182	2259	12543	21.03	116.77	-2.47315	0.966	73.481	2.167	73.513	DE - Young
GZUJ98X01_(single)_trimmed_contig_21678	protein kinase	331	1.79e-27	F:kinase activity; C:obsolete cell part		F:GO:0016772	F:transferase activity, transferring phosphorus-containing groups	313	95.106	243	1275	4.65	24.39	-2.39099	0.961	15.089	2.086	15.232	DE - Young
GZUJ98X01_(single)_trimmed_contig_21689	protein kinase like protein	1710	0	P:response to molecule of bacterial origin; P:protein phosphorylation; P:transmembrane receptor protein tyrosine kinase signaling pathway; P:stomatal complex morphogenesis; P:stamen development; P:obsolete oxidation-reduction process; F:protein serine/threonine kinase activity; F:protein tyrosine kinase activity; F:ATP binding; F:2-alkenal reductase [NAD(P)+] activity; C:plasma membrane; C:integr…	Transferring phosphorus-containing groups; Transferring phosphorus-containing groups; 2-alkenal reductase (NAD(P)(+))	P:GO:0006468; F:GO:0004672; F:GO:0005524; F:GO:0016772	P:protein phosphorylation; F:protein kinase activity; F:ATP binding; F:transferase activity, transferring phosphorus-containing groups	2296	146.055	975	4829	3.61	17.88	-2.30828	0.956	10.86	2.002	11.043	DE - Young
GZUJ98X01_(single)_trimmed_contig_21707	kinesin-like protein	3313	0	P:cytokinesis by cell plate formation; P:microtubule-based movement; P:cell population proliferation; F:microtubule motor activity; F:ATP binding; F:microtubule binding; C:nucleus; C:kinesin complex; C:microtubule; C:plasmodesma		P:GO:0007018; F:GO:0003777; F:GO:0005524; F:GO:0008017; C:GO:0005871	P:microtubule-based movement; F:microtubule motor activity; F:ATP binding; F:microtubule binding; C:kinesin complex	9369	295.707	2906	20792	5.55	39.73	-2.83967	0.97	26.605	2.533	26.725	DE - Young
GZUJ98X01_(single)_trimmed_contig_21812	leucine-rich repeat	2555	0	P:protein phosphorylation; P:metabolic process; P:response to stimulus; F:protein kinase activity; F:ATP binding; C:obsolete cell part		P:GO:0006468; F:GO:0004672; F:GO:0005524; F:GO:0016772	P:protein phosphorylation; F:protein kinase activity; F:ATP binding; F:transferase activity, transferring phosphorus-containing groups	5042	219.739	1724	9748	4.27	24.15	-2.49972	0.962	15.277	2.193	15.434	DE - Young
GZUJ98X01_(single)_trimmed_contig_21978	uridylate kinase	959	1.06e-121	P:pyrimidine nucleotide biosynthetic process; P:rRNA processing; P:tRNA metabolic process; P:aromatic amino acid family biosynthetic process; P:chloroplast organization; P:embryo development ending in seed dormancy; P:thylakoid membrane organization; P:vegetative to reproductive phase transition of meristem; P:iron-sulfur cluster assembly; P:phosphorylation; P:protein targeting to chloroplast; P:…	UMP kinase	P:GO:0006221; F:GO:0009041; F:GO:0033862; C:GO:0005737	P:pyrimidine nucleotide biosynthetic process; F:uridylate kinase activity; F:UMP kinase activity; C:cytoplasm	4400	468.467	2486	10135	16.41	66.9	-2.02743	0.9	37.736	1.722	37.775	DE - Young
GZUJ98X01_(single)_trimmed_contig_21995	esterase-like protein	1179	3.68e-112	P:metabolic process; F:hydrolase activity; C:mitochondrion		no GO terms	no GO terms	2695	233.864	1021	5909	5.48	31.73	-2.5336	0.964	20.198	2.227	20.32	DE - Young
GZUJ98X01_(single)_trimmed_contig_22084	3-deoxy-d-arabino-heptulosonate 7-phosphate synthase	232	2.78e-18	P:aromatic amino acid family biosynthetic process; P:chorismate biosynthetic process; P:chorismate biosynthetic process; P:response to wounding; P:response to bacterium; P:systemic acquired resistance; P:coumarin biosynthetic process; P:response to endoplasmic reticulum stress; F:3-deoxy-7-phosphoheptulonate synthase activity; F:protein binding; C:chloroplast thylakoid; C:membrane	3-deoxy-7-phosphoheptulonate synthase	P:GO:0009073; F:GO:0003849	P:aromatic amino acid family biosynthetic process; F:3-deoxy-7-phosphoheptulonate synthase activity	823	344	543	2226	14.82	60.74	-2.0351	0.9	34.342	1.729	34.386	DE - Young
GZUJ98X01_(single)_trimmed_contig_22167	unnamed protein product	1015	7.85e-15	F:acyltransferase activity, transferring groups other than amino-acyl groups		F:GO:0016747	F:acyltransferase activity, transferring groups other than amino-acyl groups	3138	314.061	1145	7699	7.14	48.02	-2.74964	0.97	31.725	2.443	31.819	DE - Young
GZUJ98X01_(single)_trimmed_contig_2216	lrr receptor-like serine threonine-protein kinase erecta-like	296	1.14e-44	F:ATP binding; F:transferase activity, transferring phosphorus-containing groups		F:GO:0005524; F:GO:0016772	F:ATP binding; F:transferase activity, transferring phosphorus-containing groups	838	278.581	428	1968	9.15	42.09	-2.20163	0.902	24.911	1.895	24.983	DE - Young
GZUJ98X01_(single)_trimmed_contig_2217	lrr receptor-like serine threonine-protein kinase erecta-like	296	1.14e-44	F:ATP binding; F:transferase activity, transferring phosphorus-containing groups		F:GO:0005524; F:GO:0016772	F:ATP binding; F:transferase activity, transferring phosphorus-containing groups	704	237.774	121	1924	2.59	41.15	-3.98987	0.998	30.72	3.685	30.94	DE - Young
GZUJ98X01_(single)_trimmed_contig_2218	lrr receptor-like serine threonine-protein kinase erecta-like	745	3.02e-63	F:protein binding		F:GO:0005515	F:protein binding	4353	595.745	1220	10560	10.37	89.73	-3.11317	0.99	62.264	2.808	62.328	DE - Young
GZUJ98X01_(single)_trimmed_contig_22246	nucleotide-sugar transporter family protein	1283	9.15e-168	P:purine nucleobase transport; P:pollen exine formation; P:organic anion transport; F:organic anion transmembrane transporter activity; C:endosome; C:Golgi apparatus; C:trans-Golgi network; C:plasma membrane; C:integral component of membrane		no IPS match	no IPS match	3112	250.871	896	6745	4.42	33.28	-2.91254	0.987	22.517	2.606	22.667	DE - Young
GZUJ98X01_(single)_trimmed_contig_22304	cyclin a-like protein	794	7.26e-113	P:regulation of cyclin-dependent protein serine/threonine kinase activity; P:regulation of G2/M transition of mitotic cell cycle; P:meiotic cell cycle; F:protein kinase binding		P:GO:0000079; P:GO:0010389; P:GO:0051726; F:GO:0019901	P:regulation of cyclin-dependent protein serine/threonine kinase activity; P:regulation of G2/M transition of mitotic cell cycle; P:regulation of cell cycle; F:protein kinase binding	2307	297.528	830	5463	6.62	43.56	-2.7181	0.97	28.637	2.413	28.738	DE - Young
GZUJ98X01_(single)_trimmed_contig_22417	protein	801	1.99e-120	P:respiratory burst involved in defense response; P:regulation of DNA-templated transcription; P:response to cold; P:response to wounding; P:response to mechanical stimulus; P:response to absence of light; P:ethylene biosynthetic process; P:ethylene-activated signaling pathway; P:response to chitin; P:intracellular signal transduction; P:regulation of programmed cell death; P:defense response to …		F:GO:0046872	F:metal ion binding	922	119.195	278	2649	2.2	20.94	-3.25069	0.986	14.749	2.946	15.04	DE - Young
GZUJ98X01_(single)_trimmed_contig_22450	phosphoenolpyruvate carboxylase	633	1.3e-144	P:tricarboxylic acid cycle; P:carbon fixation; F:phosphoenolpyruvate carboxylase activity; F:2-alkenal reductase [NAD(P)+] activity	2-alkenal reductase (NAD(P)(+)); Phosphoenolpyruvate carboxylase	P:GO:0006099; P:GO:0015977; F:GO:0003824; F:GO:0008964	P:tricarboxylic acid cycle; P:carbon fixation; F:catalytic activity; F:phosphoenolpyruvate carboxylase activity	983	159.044	144	2678	1.44	26.78	-4.21702	0.997	20.239	3.911	20.614	DE - Young
GZUJ98X01_(single)_trimmed_contig_22459	zinc finger protein	1241	2.14e-40	F:zinc ion binding		F:GO:0008270	F:zinc ion binding	3978	330.082	2732	12274	13.94	62.61	-2.16716	0.903	36.738	1.862	36.785	DE - Young
GZUJ98X01_(single)_trimmed_contig_22495	monothiol glutaredoxin-s17	226	1.23e-31	P:nuclear division; P:nucleolus organization; P:response to heat; P:auxin polar transport; P:cell redox homeostasis; P:regulation of cell cycle; P:reactive oxygen species metabolic process; F:electron transfer activity; F:protein-disulfide reductase activity; C:cytosol		P:GO:0045454; F:GO:0009055; F:GO:0015035	P:cell redox homeostasis; F:electron transfer activity; F:protein-disulfide reductase activity	371	152.212	280	1551	7.84	43.45	-2.47043	0.964	27.32	2.164	27.406	DE - Young
GZUJ98X01_(single)_trimmed_contig_22670	thymidylate kinase	308	1.13e-20	F:kinase activity; C:nucleoplasm; C:mitochondrion; C:cytosol		no GO terms	no GO terms	328	102.877	219	1247	4.5	25.63	-2.50984	0.963	16.243	2.204	16.392	DE - Young
GZUJ98X01_(single)_trimmed_contig_22671	protein zeu1	382	2.25e-32	P:dTDP biosynthetic process; P:phosphorylation; F:thymidylate kinase activity; F:ATP binding; C:nucleoplasm; C:mitochondrion; C:cytosol; C:chloroplast	dTMP kinase	no GO terms	no GO terms	475	121.285	302	1630	5	27.01	-2.43349	0.962	16.858	2.126	16.992	DE - Young
GZUJ98X01_(single)_trimmed_contig_22718	homeobox-leucine zipper protein hdg2-like	2127	0	P:regulation of DNA-templated transcription; P:protein acetylation; P:thylakoid membrane organization; P:regulation of meristem growth; P:trichome morphogenesis; P:stomatal complex morphogenesis; P:vegetative to reproductive phase transition of meristem; P:iron-sulfur cluster assembly; P:plant ovule development; P:maintenance of floral organ identity; P:cotyledon development; F:DNA-binding transc…		P:GO:0006355; F:GO:0003677; F:GO:0003700; F:GO:0008289; F:GO:0043565; C:GO:0005634	P:regulation of DNA-templated transcription; F:DNA binding; F:DNA-binding transcription factor activity; F:lipid binding; F:sequence-specific DNA binding; C:nucleus	7139	358.953	3245	17421	9.66	51.85	-2.42425	0.965	32.308	2.119	32.377	DE - Young
GZUJ98X01_(single)_trimmed_contig_22721	microtubule-associated protein spiral2-like	1481	1.76e-87	P:heterochromatin formation; P:histone lysine methylation		no GO terms	no GO terms	1934	145.876	584	3951	2.5	16.89	-2.75617	0.963	11.173	2.452	11.439	DE - Young
GZUJ98X01_(single)_trimmed_contig_22737	gmp synthase	1233	4.84e-93	P:glutamine metabolic process; F:transferase activity		no GO terms	no GO terms	5363	454.59	1576	12098	8.09	62.12	-2.94085	0.989	42.184	2.634	42.267	DE - Young
GZUJ98X01_(single)_trimmed_contig_22823	f-box protein at1g10780-like	1480	1.04e-156	P:DNA replication initiation; P:regulation of DNA replication; P:cell population proliferation; P:regulation of G2/M transition of mitotic cell cycle; P:obsolete histone phosphorylation; C:nucleus; C:plasmodesma		no GO terms	no GO terms	2080	147.205	672	4829	2.87	20.66	-2.84772	0.966	13.844	2.539	14.075	DE - Young
GZUJ98X01_(single)_trimmed_contig_2286	calcium-transporting atpase plasma membrane-type-like	4342	0	P:ATP biosynthetic process; P:cation transport; P:calcium ion transport; P:cellular zinc ion homeostasis; P:single fertilization; P:metabolic process; P:pollen development; P:response to nematode; P:plant-type cell wall modification; P:pollen tube growth; P:pollen exine formation; P:inflorescence morphogenesis; P:shoot system development; P:obsolete cellular process involved in reproduction; P:po…		no IPS match	no IPS match	15329	366.281	7498	32649	10.93	47.6	-2.12267	0.902	27.594	1.817	27.654	DE - Young
[truncated: 71,604 more rows]
