# Supplementary material for: Comparative transcriptome analysis of emerging young and mature leaves of Bienertia sinuspersici, a single-cell C4 plant
Source: PeerJ. 2025 Apr 29;13:e19282. doi: 10.7717/peerj.19282 (PMC12047216; doi:10.7717/peerj.19282)
Supplement: Supplemental Information 3 [file peerj-13-19282-s003.xlsx]

## Sheet: GO-Slim
GO Term	GO Name	GO Category	Emergent	Mature		GO Term	GO Name	GO Category	Emergent	Mature
GO:0007049	cell cycle	BP	1.01288e-63	0.844426		GO:0005856	cytoskeleton	CC	4.88432e-28	0.91542
GO:0009908	flower development	BP	1.04802e-45	0.46255		GO:0005730	nucleolus	CC	0.00013284	0.101582
GO:0040029	epigenetic regulation of gene expression	BP	2.25584e-31	1		GO:0005777	peroxisome	CC	0.00128929	0.0420486
GO:0006259	DNA metabolic process	BP	1.9684e-30	0.70799		GO:0005783	endoplasmic reticulum	CC	0.000511487	0.0152329
GO:0016049	cell growth	BP	1.66213e-16	0.378018		GO:0005634	nucleus	CC	2.07699e-67	9.1649e-05
GO:0036211	protein modification process	BP	2.06216e-10	0.13022		GO:0005576	extracellular region	CC	3.46049e-22	2.15645e-12
GO:0030154	cell differentiation	BP	5.95715e-10	0.153434		GO:0005886	plasma membrane	CC	1.63137e-21	3.52502e-13
GO:0009790	embryo development	BP	9.28243e-09	0.157127		GO:0005829	cytosol	CC	1.18995e-14	0.00015596
GO:0009856	pollination	BP	0.00769946	0.378018		GO:0005618	cell wall	CC	1.49166e-14	3.52854e-08
GO:0065009	regulation of molecular function	BP	3.38943e-08	0.0132358		GO:0009507	chloroplast	CC	1.21739e-12	2.61503e-31
GO:0016043	cellular component organization	BP	1.35094e-69	2.25553e-07		GO:0005773	vacuole	CC	1.09953e-08	8.97181e-06
GO:0009058	biosynthetic process	BP	9.18579e-63	2.16312e-28		GO:0005739	mitochondrion	CC	5.12703e-06	1.23052e-06
GO:0009791	post-embryonic development	BP	1.7786e-62	0.00286891		GO:0009579	thylakoid	CC	0.103633	4.20958e-19
GO:0022414	reproductive process	BP	5.31192e-55	0.00382259
GO:0006139	nucleobase-containing compound metabolic process	BP	2.89276e-43	2.19137e-12		GO Term	GO Name	GO Category	Emergent	Mature
GO:0006950	response to stress	BP	3.4771e-37	5.01074e-27		GO:0003774	cytoskeletal motor activity	MF	1.55365e-21	0.756713
GO:0042221	response to chemical	BP	5.27535e-36	3.34184e-26		GO:0030234	enzyme regulator activity	MF	2.54423e-06	0.128877
GO:0006629	lipid metabolic process	BP	2.60683e-26	0.000149051		GO:0003682	chromatin binding	MF	1.81112e-05	0.378018
GO:0009605	response to external stimulus	BP	1.59699e-22	4.15798e-13		GO:0008289	lipid binding	MF	0.00238293	0.411076
GO:0007165	signal transduction	BP	1.72019e-20	1.38515e-13		GO:0005515	protein binding	MF	8.81485e-49	0.00168047
GO:0006810	transport	BP	7.51682e-18	2.31076e-19		GO:0003677	DNA binding	MF	1.06438e-47	0.000863783
GO:0009607	response to biotic stimulus	BP	1.0329e-17	1.38063e-15		GO:0016787	hydrolase activity	MF	7.92959e-30	4.43829e-15
GO:0009719	response to endogenous stimulus	BP	1.87717e-17	2.29551e-14		GO:0000166	nucleotide binding	MF	4.42825e-29	1.12383e-06
GO:0009056	catabolic process	BP	2.4668e-17	9.30078e-09		GO:0003700	DNA-binding transcription factor activity	MF	7.69884e-13	2.16095e-05
GO:0005975	carbohydrate metabolic process	BP	8.55021e-15	1.20503e-16		GO:0016301	kinase activity	MF	2.74072e-10	5.47147e-05
GO:0019538	protein metabolic process	BP	4.47157e-12	4.58141e-05		GO:0005215	transporter activity	MF	4.26756e-06	1.7261e-09
GO:0009416	response to light stimulus	BP	1.8259e-10	0.000149051		GO:0019825	oxygen binding	MF	0.0147735	0.000370675
GO:0012501	programmed cell death	BP	3.72841e-09	0.00058995		GO:0030246	carbohydrate binding	MF	0.0315885	1.83414e-09
GO:0019748	secondary metabolic process	BP	4.26056e-08	0.00840221
GO:0006091	generation of precursor metabolites and energy	BP	0.000191795	2.15117e-21
GO:0019725	cellular homeostasis	BP	0.0113398	1.99538e-11
GO:0015979	photosynthesis	BP	0.153545	2.97589e-21

## Sheet: GO_Enrichment_Complete
GO Term	GO Name	GO Category	Emergent	Mature
GO:0003677	DNA binding	MOLECULAR_FUNCTION	2.67548e-46	0.00750998
GO:0005524	ATP binding	MOLECULAR_FUNCTION	1.78953e-26	2.70759e-06
GO:0003700	DNA-binding transcription factor activity	MOLECULAR_FUNCTION	1.21874e-11	0.000236224
GO:0035251	UDP-glucosyltransferase activity	MOLECULAR_FUNCTION	3.76861e-07	9.71088e-05
GO:0004674	protein serine/threonine kinase activity	MOLECULAR_FUNCTION	2.30518e-06	0.00298049
GO:0005506	iron ion binding	MOLECULAR_FUNCTION	7.13979e-06	9.27464e-08
GO:0005215	transporter activity	MOLECULAR_FUNCTION	4.15069e-05	3.12467e-08
GO:0016298	lipase activity	MOLECULAR_FUNCTION	0.000101955	0.00464258
GO:0020037	heme binding	MOLECULAR_FUNCTION	0.000113912	6.10152e-15
GO:0009055	electron transfer activity	MOLECULAR_FUNCTION	0.00262084	7.38998e-10
GO:0008081	phosphoric diester hydrolase activity	MOLECULAR_FUNCTION	0.00561073	0.000653728
GO:0005634	nucleus	CELLULAR_COMPONENT	7.82707e-66	0.000920315
GO:0005576	extracellular region	CELLULAR_COMPONENT	6.847e-21	5.1646e-11
GO:0005886	plasma membrane	CELLULAR_COMPONENT	3.22053e-20	7.82295e-12
GO:0005829	cytosol	CELLULAR_COMPONENT	2.12413e-13	0.00152637
GO:0005618	cell wall	CELLULAR_COMPONENT	2.68063e-13	5.60324e-07
GO:0031410	cytoplasmic vesicle	CELLULAR_COMPONENT	3.86835e-11	0.00467843
GO:0005773	vacuole	CELLULAR_COMPONENT	1.42556e-07	0.000104425
GO:0005739	mitochondrion	CELLULAR_COMPONENT	4.93759e-05	1.65419e-05		chloroplast stroma,
GO:0009570	chloroplast stroma	CELLULAR_COMPONENT	0.00201961	7.03711e-08
GO:0031967	organelle envelope	CELLULAR_COMPONENT	0.00467741	5.30526e-13
GO:0048731	system development	BIOLOGICAL_PROCESS	2.27874e-53	0.00273381
GO:0006629	lipid metabolic process	BIOLOGICAL_PROCESS	6.44145e-25	0.00145389
GO:0006355	regulation of DNA-templated transcription	BIOLOGICAL_PROCESS	6.52151e-13	4.97431e-08
GO:0009611	response to wounding	BIOLOGICAL_PROCESS	5.38638e-11	3.7327e-05
GO:0009651	response to salt stress	BIOLOGICAL_PROCESS	6.87459e-11	8.86459e-07
GO:0044248	cellular catabolic process	BIOLOGICAL_PROCESS	2.1685e-10	0.000143204
GO:0009414	response to water deprivation	BIOLOGICAL_PROCESS	1.21027e-08	0.00907438
GO:0009733	response to auxin	BIOLOGICAL_PROCESS	4.77254e-06	1.24025e-05
GO:0006612	protein targeting to membrane	BIOLOGICAL_PROCESS	5.04593e-06	0.00150245
GO:0010363	regulation of plant-type hypersensitive response	BIOLOGICAL_PROCESS	9.00209e-06	0.000236224
GO:0009072	aromatic amino acid metabolic process	BIOLOGICAL_PROCESS	1.60267e-05	0.00808088
GO:0009737	response to abscisic acid	BIOLOGICAL_PROCESS	2.23868e-05	0.000994089
GO:0009751	response to salicylic acid	BIOLOGICAL_PROCESS	2.92463e-05	8.34479e-05
GO:0009620	response to fungus	BIOLOGICAL_PROCESS	5.56319e-05	9.71088e-05
GO:0009409	response to cold	BIOLOGICAL_PROCESS	5.9845e-05	4.94681e-05
GO:0030001	metal ion transport	BIOLOGICAL_PROCESS	9.59114e-05	1.36808e-05
GO:0044042	glucan metabolic process	BIOLOGICAL_PROCESS	0.000107446	0.00985542
GO:0090407	organophosphate biosynthetic process	BIOLOGICAL_PROCESS	0.000345392	0.000231658
GO:0061024	flavanone 3-dioxygenase activity	BIOLOGICAL_PROCESS	0.000435139	0.000497847
GO:0010200	response to chitin	BIOLOGICAL_PROCESS	0.000511748	2.18404e-09
GO:0009141	nucleoside triphosphate metabolic process	BIOLOGICAL_PROCESS	0.002578	0.000155239
GO:0009867	jasmonic acid mediated signaling pathway	BIOLOGICAL_PROCESS	0.00267147	0.000209964
GO:0000272	polysaccharide catabolic process	BIOLOGICAL_PROCESS	0.00347475	0.00631971
GO:0019344	cysteine biosynthetic process	BIOLOGICAL_PROCESS	0.00376949	1.88787e-06
GO:0071705	nitrogen compound transport	BIOLOGICAL_PROCESS	0.003772	0.000240485
GO:0098660	inorganic ion transmembrane transport	BIOLOGICAL_PROCESS	0.00812918	0.00352656
GO:0009693	ethylene biosynthetic process	BIOLOGICAL_PROCESS	0.0093637	0.00684452
GO:0008017	microtubule binding	MOLECULAR_FUNCTION	1.17445e-25	1
GO:0046982	protein heterodimerization activity	MOLECULAR_FUNCTION	8.91219e-19	1
GO:0019901	protein kinase binding	MOLECULAR_FUNCTION	1.06078e-11	1
GO:0003678	DNA helicase activity	MOLECULAR_FUNCTION	2.95506e-09	1
GO:0004144	diacylglycerol O-acyltransferase activity	MOLECULAR_FUNCTION	1.48749e-08	1
GO:0016165	linoleate 13S-lipoxygenase activity	MOLECULAR_FUNCTION	1.96916e-08	1
GO:0004049	anthranilate synthase activity	MOLECULAR_FUNCTION	1.4382e-07	0.613081
GO:0008810	cellulase activity	MOLECULAR_FUNCTION	3.28655e-07	0.92793
GO:0008756	o-succinylbenzoate-CoA ligase activity	MOLECULAR_FUNCTION	4.57246e-07	0.0152833
GO:0004657	proline dehydrogenase activity	MOLECULAR_FUNCTION	7.62133e-07	1
GO:0004781	sulfate adenylyltransferase (ATP) activity	MOLECULAR_FUNCTION	1.06551e-05	1
GO:0035175	histone H3S10 kinase activity	MOLECULAR_FUNCTION	2.09939e-05	1
GO:0016208	AMP binding	MOLECULAR_FUNCTION	2.24815e-05	0.0211271
GO:0005516	calmodulin binding	MOLECULAR_FUNCTION	3.39651e-05	1
GO:0016538	cyclin-dependent protein serine/threonine kinase regulator activity	MOLECULAR_FUNCTION	4.50969e-05	1
GO:0080019	alcohol-forming very long-chain fatty acyl-CoA reductase activity	MOLECULAR_FUNCTION	4.50969e-05	1
GO:0004693	cyclin-dependent protein serine/threonine kinase activity	MOLECULAR_FUNCTION	7.5877e-05	1
GO:0003682	chromatin binding	MOLECULAR_FUNCTION	0.000159955	1
GO:0042973	glucan endo-1,3-beta-D-glucosidase activity	MOLECULAR_FUNCTION	0.000303244	1
GO:0045486	flavanone 3-dioxygenase activity	MOLECULAR_FUNCTION	0.000346275	1
GO:0017111	ribonucleoside triphosphate phosphatase activity	MOLECULAR_FUNCTION	0.000642897	1
GO:0003883	CTP synthase activity	MOLECULAR_FUNCTION	0.000652666	1
GO:0008569	minus-end-directed microtubule motor activity	MOLECULAR_FUNCTION	0.000652666	1
GO:0004748	ribonucleoside-diphosphate reductase activity, thioredoxin disulfide as acceptor	MOLECULAR_FUNCTION	0.00108676	1
GO:0003713	transcription coactivator activity	MOLECULAR_FUNCTION	0.00184056	1
GO:0018456	aryl-alcohol dehydrogenase (NAD+) activity	MOLECULAR_FUNCTION	0.00219991	1
GO:0030337	DNA polymerase processivity factor activity	MOLECULAR_FUNCTION	0.00219991	1
GO:0047364	desulfoglucosinolate sulfotransferase activity	MOLECULAR_FUNCTION	0.00241681	1
GO:0000976	transcription cis-regulatory region binding	MOLECULAR_FUNCTION	0.00294553	1
GO:0030599	pectinesterase activity	MOLECULAR_FUNCTION	0.00356144	1
GO:0016803	ether hydrolase activity	MOLECULAR_FUNCTION	0.00423545	1
GO:0042409	caffeoyl-CoA O-methyltransferase activity	MOLECULAR_FUNCTION	0.00423545	1
GO:0016847	1-aminocyclopropane-1-carboxylate synthase activity	MOLECULAR_FUNCTION	0.004604	1
GO:0070330	aromatase activity	MOLECULAR_FUNCTION	0.004604	1
GO:0019842	vitamin binding	MOLECULAR_FUNCTION	0.00544157	1
GO:0010385	double-stranded methylated DNA binding	MOLECULAR_FUNCTION	0.0054421	1
GO:0016901	oxidoreductase activity, acting on the CH-OH group of donors, quinone or similar compound as acceptor	MOLECULAR_FUNCTION	0.0054421	1
GO:0004070	aspartate carbamoyltransferase activity	MOLECULAR_FUNCTION	0.00559503	1
GO:0047172	shikimate O-hydroxycinnamoyltransferase activity	MOLECULAR_FUNCTION	0.00559503	1
GO:0047205	quinate O-hydroxycinnamoyltransferase activity	MOLECULAR_FUNCTION	0.00559503	1
GO:0016627	oxidoreductase activity, acting on the CH-CH group of donors	MOLECULAR_FUNCTION	0.00604971	1
GO:0045551	cinnamyl-alcohol dehydrogenase activity	MOLECULAR_FUNCTION	0.00680595	1
GO:0004650	polygalacturonase activity	MOLECULAR_FUNCTION	0.00792146	1
GO:0000786	nucleosome	CELLULAR_COMPONENT	1.70263e-28	1
GO:0005871	kinesin complex	CELLULAR_COMPONENT	6.71356e-19	1
GO:0042555	MCM complex	CELLULAR_COMPONENT	7.25048e-18	1
GO:0009506	plasmodesma	CELLULAR_COMPONENT	6.00408e-13	0.256077
GO:0000796	condensin complex	CELLULAR_COMPONENT	2.89115e-11	1
GO:0005819	spindle	CELLULAR_COMPONENT	2.1685e-10	1
GO:0005950	anthranilate synthase complex	CELLULAR_COMPONENT	1.48049e-08	1
GO:0009524	phragmoplast	CELLULAR_COMPONENT	4.52696e-07	1
GO:0055028	cortical microtubule	CELLULAR_COMPONENT	7.01327e-07	1
GO:0009505	plant-type cell wall	CELLULAR_COMPONENT	3.13338e-06	0.013834
GO:0009574	preprophase band	CELLULAR_COMPONENT	2.82237e-05	1
GO:0005662	DNA replication factor A complex	CELLULAR_COMPONENT	0.000346275	1
GO:0009504	cell plate	CELLULAR_COMPONENT	0.00050971	1
GO:0005730	nucleolus	CELLULAR_COMPONENT	0.0010535	0.422563
GO:0005971	ribonucleoside-diphosphate reductase complex	CELLULAR_COMPONENT	0.00108676	1
GO:0043626	PCNA complex	CELLULAR_COMPONENT	0.00219991	1
GO:0005783	endoplasmic reticulum	CELLULAR_COMPONENT	0.00370319	0.0907285
GO:0005774	vacuolar membrane	CELLULAR_COMPONENT	0.00548305	0.0132168
GO:0000307	cyclin-dependent protein kinase holoenzyme complex	CELLULAR_COMPONENT	0.00559503	1
GO:0009897	external side of plasma membrane	CELLULAR_COMPONENT	0.00840832	1
GO:0005777	peroxisome	CELLULAR_COMPONENT	0.00862895	0.212868
GO:0000911	cytokinesis by cell plate formation	BIOLOGICAL_PROCESS	3.24904e-46	1
GO:0006275	regulation of DNA replication	BIOLOGICAL_PROCESS	1.27022e-40	1
GO:0006270	DNA replication initiation	BIOLOGICAL_PROCESS	2.08427e-36	1
GO:0006334	nucleosome assembly	BIOLOGICAL_PROCESS	2.38005e-27	1
GO:0009909	regulation of flower development	BIOLOGICAL_PROCESS	4.45254e-24	1
GO:0010389	regulation of G2/M transition of mitotic cell cycle	BIOLOGICAL_PROCESS	4.59114e-23	1
GO:0007018	microtubule-based movement	BIOLOGICAL_PROCESS	2.2303e-18	1
GO:0000079	regulation of cyclin-dependent protein serine/threonine kinase activity	BIOLOGICAL_PROCESS	4.99988e-16	1
GO:0006268	DNA unwinding involved in DNA replication	BIOLOGICAL_PROCESS	3.39627e-14	1
GO:0010075	regulation of meristem growth	BIOLOGICAL_PROCESS	1.83624e-13	1
GO:0007076	mitotic chromosome condensation	BIOLOGICAL_PROCESS	8.77702e-13	1
GO:0042023	DNA endoreduplication	BIOLOGICAL_PROCESS	5.0506e-11	1
GO:0010103	stomatal complex morphogenesis	BIOLOGICAL_PROCESS	7.32368e-11	0.616758
GO:0051225	spindle assembly	BIOLOGICAL_PROCESS	7.4749e-11	1
GO:0008356	asymmetric cell division	BIOLOGICAL_PROCESS	7.73698e-11	1
GO:0007000	nucleolus organization	BIOLOGICAL_PROCESS	3.45039e-09	1
GO:0010583	response to cyclopentenone	BIOLOGICAL_PROCESS	1.27329e-08	1
GO:0009664	plant-type cell wall organization	BIOLOGICAL_PROCESS	4.75656e-08	1
GO:0006346	DNA methylation-dependent heterochromatin formation	BIOLOGICAL_PROCESS	8.82072e-08	1
GO:0009926	auxin polar transport	BIOLOGICAL_PROCESS	8.9124e-08	0.319297
GO:0006567	threonine catabolic process	BIOLOGICAL_PROCESS	1.56359e-07	0.861742
GO:0031048	regulatory ncRNA-mediated heterochromatin formation	BIOLOGICAL_PROCESS	2.4982e-07	1
GO:0006562	proline catabolic process	BIOLOGICAL_PROCESS	6.02023e-07	0.464336
GO:0016444	somatic cell DNA recombination	BIOLOGICAL_PROCESS	9.34147e-07	1
GO:0080167	response to karrikin	BIOLOGICAL_PROCESS	1.12117e-06	1
GO:0042127	regulation of cell population proliferation	BIOLOGICAL_PROCESS	1.81579e-06	1
GO:0048453	sepal formation	BIOLOGICAL_PROCESS	2.07334e-06	1
GO:0007169	cell surface receptor protein tyrosine kinase signaling pathway	BIOLOGICAL_PROCESS	2.66865e-06	0.0870726
GO:0009793	embryo development ending in seed dormancy	BIOLOGICAL_PROCESS	2.69142e-06	1
GO:0048451	petal formation	BIOLOGICAL_PROCESS	2.7342e-06	1
GO:0016126	sterol biosynthetic process	BIOLOGICAL_PROCESS	2.88324e-06	1
GO:0000724	double-strand break repair via homologous recombination	BIOLOGICAL_PROCESS	3.24965e-06	1
GO:0046686	response to cadmium ion	BIOLOGICAL_PROCESS	7.82091e-06	0.0133171
GO:0000162	tryptophan biosynthetic process	BIOLOGICAL_PROCESS	1.06551e-05	0.955155
GO:0009825	multidimensional cell growth	BIOLOGICAL_PROCESS	1.33924e-05	1
GO:0019761	glucosinolate biosynthetic process	BIOLOGICAL_PROCESS	1.66291e-05	0.0460109
GO:0009901	anther dehiscence	BIOLOGICAL_PROCESS	2.24815e-05	1
GO:0006833	water transport	BIOLOGICAL_PROCESS	3.4053e-05	0.645176
GO:0048283	indeterminate inflorescence morphogenesis	BIOLOGICAL_PROCESS	3.98583e-05	1
GO:0010440	stomatal lineage progression	BIOLOGICAL_PROCESS	5.207e-05	1
GO:0051302	regulation of cell division	BIOLOGICAL_PROCESS	6.47392e-05	1
GO:0048513	animal organ development	BIOLOGICAL_PROCESS	8.66224e-05	1
GO:0009809	lignin biosynthetic process	BIOLOGICAL_PROCESS	0.000121143	1
GO:0010311	lateral root formation	BIOLOGICAL_PROCESS	0.000136238	1
GO:0043481	anthocyanin accumulation in tissues in response to UV light	BIOLOGICAL_PROCESS	0.000136238	1
GO:0052096	formation of syncytium involving giant cell for nutrient acquisition	BIOLOGICAL_PROCESS	0.000147839	1
GO:0009684	indoleacetic acid biosynthetic process	BIOLOGICAL_PROCESS	0.000156652	0.0235577
GO:0008361	regulation of cell size	BIOLOGICAL_PROCESS	0.000190628	1
GO:0000103	sulfate assimilation	BIOLOGICAL_PROCESS	0.000203225	0.955155
GO:0009686	gibberellin biosynthetic process	BIOLOGICAL_PROCESS	0.000267483	0.359369
GO:0002237	response to molecule of bacterial origin	BIOLOGICAL_PROCESS	0.000272095	0.278273
GO:0009165	nucleotide biosynthetic process	BIOLOGICAL_PROCESS	0.000302525	0.0100844
GO:0009970	cellular response to sulfate starvation	BIOLOGICAL_PROCESS	0.000303244	1
GO:0048767	root hair elongation	BIOLOGICAL_PROCESS	0.000355317	1
GO:0031408	oxylipin biosynthetic process	BIOLOGICAL_PROCESS	0.000486711	0.174532
GO:0042545	cell wall modification	BIOLOGICAL_PROCESS	0.00050161	0.717286
GO:0001558	regulation of cell growth	BIOLOGICAL_PROCESS	0.000559524	1
GO:0046785	microtubule polymerization	BIOLOGICAL_PROCESS	0.000559524	1
GO:0009640	photomorphogenesis	BIOLOGICAL_PROCESS	0.000611777	1
GO:0009556	microsporogenesis	BIOLOGICAL_PROCESS	0.000639691	1
GO:0022603	regulation of anatomical structure morphogenesis	BIOLOGICAL_PROCESS	0.000753488	1
GO:0010224	response to UV-B	BIOLOGICAL_PROCESS	0.000791142	1
GO:0043161	proteasome-mediated ubiquitin-dependent protein catabolic process	BIOLOGICAL_PROCESS	0.000846809	1
GO:0006569	tryptophan catabolic process	BIOLOGICAL_PROCESS	0.000896291	0.219704
GO:0010112	regulation of systemic acquired resistance	BIOLOGICAL_PROCESS	0.000963523	0.774919
GO:0009832	plant-type cell wall biogenesis	BIOLOGICAL_PROCESS	0.00101067	0.934902
GO:0009696	salicylic acid metabolic process	BIOLOGICAL_PROCESS	0.00106682	0.334123
GO:0009652	thigmotropism	BIOLOGICAL_PROCESS	0.00108676	1
GO:0030243	cellulose metabolic process	BIOLOGICAL_PROCESS	0.00116675	0.142478
GO:0042538	hyperosmotic salinity response	BIOLOGICAL_PROCESS	0.00119899	0.0362348
GO:0009963	positive regulation of flavonoid biosynthetic process	BIOLOGICAL_PROCESS	0.00134134	0.798919
GO:0006084	acetyl-CoA metabolic process	BIOLOGICAL_PROCESS	0.00155208	1
GO:0000271	polysaccharide biosynthetic process	BIOLOGICAL_PROCESS	0.00199721	0.0229999
GO:0009845	seed germination	BIOLOGICAL_PROCESS	0.00234828	1
GO:0048366	leaf development	BIOLOGICAL_PROCESS	0.00241681	0.049623
GO:0006096	glycolytic process	BIOLOGICAL_PROCESS	0.00241681	0.0497384
GO:0007030	Golgi organization	BIOLOGICAL_PROCESS	0.00245072	0.601146
GO:0010359	regulation of anion channel activity	BIOLOGICAL_PROCESS	0.00265624	1
GO:0009624	response to nematode	BIOLOGICAL_PROCESS	0.00280546	0.753469
GO:0045786	negative regulation of cell cycle	BIOLOGICAL_PROCESS	0.00294553	1
GO:0046486	glycerolipid metabolic process	BIOLOGICAL_PROCESS	0.00296018	0.602347
GO:0009746	response to hexose	BIOLOGICAL_PROCESS	0.00297874	0.0365327
GO:0042761	very long-chain fatty acid biosynthetic process	BIOLOGICAL_PROCESS	0.00299888	1
GO:0043414	macromolecule methylation	BIOLOGICAL_PROCESS	0.00299922	1
GO:0019722	calcium-mediated signaling	BIOLOGICAL_PROCESS	0.00313825	0.644539
GO:0006537	glutamate biosynthetic process	BIOLOGICAL_PROCESS	0.00323914	1
GO:0009957	epidermal cell fate specification	BIOLOGICAL_PROCESS	0.00323914	1
GO:0003002	regionalization	BIOLOGICAL_PROCESS	0.00354349	1
GO:0009269	response to desiccation	BIOLOGICAL_PROCESS	0.00393531	1
GO:0042218	1-aminocyclopropane-1-carboxylate biosynthetic process	BIOLOGICAL_PROCESS	0.00400571	1
GO:0007349	cellularization	BIOLOGICAL_PROCESS	0.00423545	1
GO:0042631	cellular response to water deprivation	BIOLOGICAL_PROCESS	0.00508752	1
GO:0000041	transition metal ion transport	BIOLOGICAL_PROCESS	0.00508986	0.0497384
GO:0009860	pollen tube growth	BIOLOGICAL_PROCESS	0.0054399	1
GO:0046174	polyol catabolic process	BIOLOGICAL_PROCESS	0.0054421	1
GO:0009740	gibberellic acid mediated signaling pathway	BIOLOGICAL_PROCESS	0.0055201	0.219704
GO:0043248	proteasome assembly	BIOLOGICAL_PROCESS	0.0055901	1
GO:0051788	response to misfolded protein	BIOLOGICAL_PROCESS	0.0055901	1
GO:0009186	deoxyribonucleoside diphosphate metabolic process	BIOLOGICAL_PROCESS	0.00559503	1
GO:0009718	anthocyanin-containing compound biosynthetic process	BIOLOGICAL_PROCESS	0.00562363	0.0902765
GO:0061640	cytoskeleton-dependent cytokinesis	BIOLOGICAL_PROCESS	0.00596146	1
GO:0015996	chlorophyll catabolic process	BIOLOGICAL_PROCESS	0.00624286	1
GO:0050832	defense response to fungus	BIOLOGICAL_PROCESS	0.00716703	0.0368888
GO:0019318	hexose metabolic process	BIOLOGICAL_PROCESS	0.00773732	0.32463
GO:0010876	lipid localization	BIOLOGICAL_PROCESS	0.00789919	0.0993019
GO:0005982	starch metabolic process	BIOLOGICAL_PROCESS	0.00819772	0.0981339
GO:0034614	cellular response to reactive oxygen species	BIOLOGICAL_PROCESS	0.00857328	1
GO:0009694	jasmonic acid metabolic process	BIOLOGICAL_PROCESS	0.00900176	0.99662
GO:0071215	cellular response to abscisic acid stimulus	BIOLOGICAL_PROCESS	0.0093637	0.319644
GO:1901568	fatty acid derivative metabolic process	BIOLOGICAL_PROCESS	0.00960135	1
GO:0008270	zinc ion binding	MOLECULAR_FUNCTION	0.0405404	7.78146e-05
GO:0022804	active transmembrane transporter activity	MOLECULAR_FUNCTION	0.0414509	0.000553885
GO:0016762	xyloglucan:xyloglucosyl transferase activity	MOLECULAR_FUNCTION	0.0426514	8.15417e-05
GO:0048029	monosaccharide binding	MOLECULAR_FUNCTION	0.0468975	0.00168647
GO:0005509	calcium ion binding	MOLECULAR_FUNCTION	0.0530039	1.73278e-12
GO:0019825	oxygen binding	MOLECULAR_FUNCTION	0.0769892	0.00332152
GO:0015035	protein-disulfide reductase activity	MOLECULAR_FUNCTION	0.110701	1.03089e-08
GO:0080032	methyl jasmonate esterase activity	MOLECULAR_FUNCTION	0.152418	0.00797248
GO:0004435	phosphatidylinositol phospholipase C activity	MOLECULAR_FUNCTION	0.176723	1.54328e-08
GO:0004601	peroxidase activity	MOLECULAR_FUNCTION	0.213393	2.85187e-08
GO:0051539	4 iron, 4 sulfur cluster binding	MOLECULAR_FUNCTION	0.231989	0.00244465
GO:0016709	oxidoreductase activity, acting on paired donors, with incorporation or reduction of molecular oxygen, NAD(P)H as one donor, and incorporation of one atom of oxygen	MOLECULAR_FUNCTION	0.238834	0.00332152
GO:0015318	inorganic molecular entity transmembrane transporter activity	MOLECULAR_FUNCTION	0.312498	0.00183072
GO:0004175	endopeptidase activity	MOLECULAR_FUNCTION	0.388211	0.00684452
GO:0016168	chlorophyll binding	MOLECULAR_FUNCTION	0.606581	3.03749e-08
GO:0008794	arsenate reductase (glutaredoxin) activity	MOLECULAR_FUNCTION	1	8.86896e-07
GO:0046524	sucrose-phosphate synthase activity	MOLECULAR_FUNCTION	1	3.58498e-05
GO:0030247	polysaccharide binding	MOLECULAR_FUNCTION	1	0.000137194
GO:0016161	beta-amylase activity	MOLECULAR_FUNCTION	1	0.000156368
GO:0008061	chitin binding	MOLECULAR_FUNCTION	1	0.00111133
GO:0004568	chitinase activity	MOLECULAR_FUNCTION	1	0.00273381
GO:0003987	acetate-CoA ligase activity	MOLECULAR_FUNCTION	1	0.00398799
GO:0015078	proton transmembrane transporter activity	MOLECULAR_FUNCTION	1	0.00945285
GO:0031969	chloroplast membrane	CELLULAR_COMPONENT	0.0577093	0.00653683
GO:0009535	chloroplast thylakoid membrane	CELLULAR_COMPONENT	0.339189	3.95663e-20
GO:0009523	photosystem II	CELLULAR_COMPONENT	1	1.60988e-10
GO:0010287	plastoglobule	CELLULAR_COMPONENT	1	1.64288e-07
GO:0030076	light-harvesting complex	CELLULAR_COMPONENT	1	4.39947e-05
GO:0009538	photosystem I reaction center	CELLULAR_COMPONENT	1	0.000145431
GO:0006508	proteolysis	BIOLOGICAL_PROCESS	0.0227567	0.0065187
GO:0009739	response to gibberellin	BIOLOGICAL_PROCESS	0.0256605	8.2711e-05
GO:0046148	pigment biosynthetic process	BIOLOGICAL_PROCESS	0.0358312	0.000764398
GO:0006869	lipid transport	BIOLOGICAL_PROCESS	0.0380675	0.00684452
GO:0006979	response to oxidative stress	BIOLOGICAL_PROCESS	0.0414412	8.98187e-06
GO:0048585	negative regulation of response to stimulus	BIOLOGICAL_PROCESS	0.0547574	0.00720463
GO:0009744	response to sucrose	BIOLOGICAL_PROCESS	0.0609037	0.00524959
GO:0010027	thylakoid membrane organization	BIOLOGICAL_PROCESS	0.0628611	0.000247225
GO:0006857	oligopeptide transport	BIOLOGICAL_PROCESS	0.0665326	0.0027331
GO:0000165	MAPK cascade	BIOLOGICAL_PROCESS	0.0676737	0.00174321
GO:0044036	cell wall macromolecule metabolic process	BIOLOGICAL_PROCESS	0.0774521	0.000258512
GO:0048193	Golgi vesicle transport	BIOLOGICAL_PROCESS	0.106476	0.00325437
GO:0042742	defense response to bacterium	BIOLOGICAL_PROCESS	0.107806	0.00109459
GO:0010114	response to red light	BIOLOGICAL_PROCESS	0.108121	1.89709e-05
GO:0009862	systemic acquired resistance, salicylic acid mediated signaling pathway	BIOLOGICAL_PROCESS	0.109164	0.00338165
GO:0015706	nitrate transmembrane transport	BIOLOGICAL_PROCESS	0.141524	0.00713581
GO:0042743	hydrogen peroxide metabolic process	BIOLOGICAL_PROCESS	0.179433	0.00126804
GO:0051649	establishment of localization in cell	BIOLOGICAL_PROCESS	0.196677	0.00332152
GO:0030003	intracellular monoatomic cation homeostasis	BIOLOGICAL_PROCESS	0.222666	0.000683912
GO:0010167	response to nitrate	BIOLOGICAL_PROCESS	0.243204	0.00376104
GO:0009658	chloroplast organization	BIOLOGICAL_PROCESS	0.265907	0.00300658
GO:0010089	xylem development	BIOLOGICAL_PROCESS	0.265907	0.00322659
GO:0006826	iron ion transport	BIOLOGICAL_PROCESS	0.27197	0.000683912
GO:0045454	cell redox homeostasis	BIOLOGICAL_PROCESS	0.274352	2.87182e-08
GO:0010218	response to far red light	BIOLOGICAL_PROCESS	0.311417	2.85392e-05
GO:0009873	ethylene-activated signaling pathway	BIOLOGICAL_PROCESS	0.329156	0.00684452
GO:0051640	organelle localization	BIOLOGICAL_PROCESS	0.353967	0.00765705
GO:0045893	positive regulation of DNA-templated transcription	BIOLOGICAL_PROCESS	0.406236	0.000683912
GO:0009637	response to blue light	BIOLOGICAL_PROCESS	0.435723	0.000599271
GO:0006098	pentose-phosphate shunt	BIOLOGICAL_PROCESS	0.65314	3.28067e-05
GO:0010106	cellular response to iron ion starvation	BIOLOGICAL_PROCESS	0.731119	0.00322659
GO:0010196	nonphotochemical quenching	BIOLOGICAL_PROCESS	0.769138	0.00797248
GO:0009765	photosynthesis, light harvesting	BIOLOGICAL_PROCESS	1	1.88253e-06
GO:0019605	butyrate metabolic process	BIOLOGICAL_PROCESS	1	2.19053e-05
GO:0006754	ATP biosynthetic process	BIOLOGICAL_PROCESS	1	0.000851062
GO:0006083	acetate metabolic process	BIOLOGICAL_PROCESS	1	0.00113612
GO:0006364	rRNA processing	BIOLOGICAL_PROCESS	1	0.00139167
GO:0006032	chitin catabolic process	BIOLOGICAL_PROCESS	1	0.00168647
GO:0010044	response to aluminum ion	BIOLOGICAL_PROCESS	1	0.00201521
GO:0010045	response to nickel cation	BIOLOGICAL_PROCESS	1	0.00201521
GO:0010270	photosystem II oxygen evolving complex assembly	BIOLOGICAL_PROCESS	1	0.00201521
GO:0005986	sucrose biosynthetic process	BIOLOGICAL_PROCESS	1	0.00246201
GO:0009767	photosynthetic electron transport chain	BIOLOGICAL_PROCESS	1	0.00263773
GO:0016559	peroxisome fission	BIOLOGICAL_PROCESS	1	0.00322659
GO:0051347	positive regulation of transferase activity	BIOLOGICAL_PROCESS	1	0.00322659
GO:0006624	vacuolar protein processing	BIOLOGICAL_PROCESS	1	0.0041079
GO:0019805	quinolinate biosynthetic process	BIOLOGICAL_PROCESS	1	0.00761439
GO:0006097	glyoxylate cycle	BIOLOGICAL_PROCESS	1	0.00797248
